# Supplementary material for: Integrative CAGE and DNA Methylation Profiling Identify Epigenetically Regulated Genes in NSCLC
Source: Oxford University Press journal article supplement (doi:10.1158/1541-7786.mcr-17-0191), 2017-07-11
Supplement: 15417786mcr170191-sup-181812_2_supp_4116752_vrxgrr.xlsx [file 15417786mcr170191-sup-181812_2_supp_4116752_vrxgrr.xlsx]

## Sheet: S1
Supplementary Table S1: Cell samples used for CAGE profiling.
Category1	Category2	Name	Description	Library Name	Cell lot	Cell catalog	Company	RNA lot number	RNA Catalog number	Tissue	Sex	Age	Ethnicity
NSCLC cell	cell lines	NCI-H1385	unspecified NSCLC	CNhs12193		CRL-5867	ATCC			lung	female	49	Black
NSCLC cell	cell lines	NCI-H460	large cell carcinoma	CNhs12806		HTB177	ATCC			lung	male	unknown	unknown
NSCLC cell	cell lines	NCI-H650	adenocarcinoma	CNhs14138		CRL-5835	ATCC			lung	male	N/A	N/A
NSCLC cell	cell lines	KNS-62	squamous cell carcinoma	CNhs11862		ifo50358	JAPAN HEALTH SCIENCES FOUNDATION - Health Science Research Resources Bank			lung	male	49	unknown
NSCLC cell	cell lines	PC-14	adenocarcinoma	CNhs10726		RCB0446	RIKEN Bioresource centre			lung	unknown	unknown	Japanese
NSCLC cell	cell lines	NCI-H441	adenocarcinoma	CNhs14245		HTB-174	ATCC			lung	male	N/A	N/A
NSCLC cell	cell lines	NCI-H358	adenocarcinoma	CNhs11840		CRL-5807	ATCC			lung	male	N/A	N/A
NSCLC cell	cell lines	SW 1573	adenocarcinoma	CNhs11838		CRL-2170	ATCC			lung	female	44	Caucasian
NSCLC cell	cell lines	ChaGo-K-1	unspecified NSCLC	CNhs11841		HTB-168	ATCC			lung	male	45	N/A
NSCLC cell	cell lines	LC-1F	squamous cell carcinoma	CNhs14238		RCB0439	RIKEN Bioresource centre			lung	male	69	Japanese
NSCLC cell	cell lines	A549	adenocarcinoma	CNhs11275		RCB0098	RIKEN Bioresource centre			lung	male	unknown	unknown
NSCLC cell	cell lines	EBC-1	squamous cell carcinoma	CNhs11273		RCB1965	RIKEN Bioresource centre			lung	male	69	unknown
NSCLC cell	cell lines	LU65	large cell carcinoma	CNhs11274		RCB1967	RIKEN Bioresource centre			lung	unknown	unknown	unknown
NSCLC cell	cell lines	RERF-LC-AI	squamous cell carcinoma	CNhs14240		RCB0444	RIKEN Bioresource centre			lung	male	unknown	Japanese
NSCLC cell	cell lines	Lu99B	large cell carcinoma	CNhs10751		RCB1971	RIKEN Bioresource centre			lung	male	63	Japanese
NSCLC cell	cell lines	IA-LM	large cell carcinoma	CNhs11277		RCB0554	RIKEN Bioresource centre			lung	male	68	Japanese
lung epithelial cell	primary cells	BEC1	bronchial epithelial cell	CNhs11327	N/A	N/A	Sciencell/3H	3968	SC3215	lung	N/A	N/A	N/A
lung epithelial cell	primary cells	BEC2	bronchial epithelial cell	CNhs12085	N/A	N/A	Sciencell/3H	23052	SC3215	lung	N/A	N/A	N/A
lung epithelial cell	primary cells	BEC3	bronchial epithelial cell	CNhs12623	N/A	N/A	Sciencell/3H	6784	SC3215	lung	N/A	N/A	N/A
lung epithelial cell	primary cells	BEC4	bronchial epithelial cell	CNhs12054	N/A	N/A	Cell Applications	1858	CA502-R10a	lung	male	20	unknown
lung epithelial cell	primary cells	BEC5	bronchial epithelial cell	CNhs12058	N/A	N/A	Cell Applications	1473	CA502-R10a	lung	female	63	unknown
lung epithelial cell	primary cells	BEC6	bronchial epithelial cell	CNhs12062	N/A	N/A	Cell Applications	1217	CA502-R10a	lung	male	45	Caucasian
lung epithelial cell	primary cells	BEC7	bronchial epithelial cell	CNhs12642	N/A	N/A	Sciencell/3H	6805	SC3215	lung	N/A	N/A	N/A
lung epithelial cell	primary cells	AEC1	alveolar epithelial Cell	CNhs11325	N/A	N/A	Sciencell/3H	5020	SC3205	lung	N/A	N/A	N/A
lung epithelial cell	primary cells	AEC2	alveolar epithelial Cell	CNhs12084	N/A	N/A	Sciencell/3H	4978	SC3205	lung	N/A	N/A	N/A
lung epithelial cell	primary cells	AEC3	alveolar epithelial Cell	CNhs12119	N/A	N/A	Sciencell/3H	5001	SC3205	lung	N/A	N/A	N/A
lung epithelial cell	primary cells	TEC1	tracheal epithelial cell	CNhs11092	N/A	N/A	Cell Applications	1875	CA504-R10a	trachea	female	50	Caucasian
lung epithelial cell	primary cells	TEC2	tracheal epithelial cell	CNhs11993	N/A	N/A	Cell Applications	1217	CA504-R10a	trachea	male	45	Caucasian
lung epithelial cell	primary cells	TEC3	tracheal epithelial cell	CNhs12051	N/A	N/A	Cell Applications	1225	CA504-R10a	trachea	male	60	Caucasian
lung epithelial cell	primary cells	SAEC1	small airway epithelial cell	CNhs10884	4F0715	CC-2547	Lonza	N/A	N/A	lung	female	19	Caucasian
lung epithelial cell	primary cells	SAEC2	small airway epithelial cell	CNhs11975	5F0380J	CC-2547	Lonza	N/A	N/A	lung	male	58	Caucasian
lung epithelial cell	primary cells	SAEC3	small airway epithelial cell	CNhs12016	8F3145	CC-2547	Lonza	N/A	N/A	lung	male	50	Caucasian

## Sheet: S2
Supplementary Table S2: Public datasets.
	Dataset	PMID	Sample type	Method	NSCLC	adenocarcinoma	squamous cell carcinoma	normal
Expression	FANTOM5	24670764	cell line	CAGE	16			16
	DBTSS (DRA001846/DRA002311)	25378318	cell line	RNA-seq	26			1
	E-MTAB-2706	25485619	cell line	RNA-seq	58			0
	TCGA LUAD	25079552	tissue	RNA-seq	515			59
	TCGA LUSC	22960745	tissue	RNA-seq	501			49
	GSE81089	27699219	tissue	RNA-seq	199			19
	GSE30219	23698379	tissue	Affymetrix Human Genome U133 Plus 2.0 Array		85	61
	GSE31210	22080568	tissue	Affymetrix Human Genome U133 Plus 2.0 Array		204	0
	GSE3141	16273092	tissue	Affymetrix Human Genome U133 Plus 2.0 Array		58	53
	GSE37745	23032747	tissue	Affymetrix Human Genome U133 Plus 2.0 Array		106	66
	GSE50081	24305008	tissue	Affymetrix Human Genome U133 Plus 2.0 Array		127	43
	E-MTAB-923	22914773	tissue	Affymetrix Human Genome U133 Plus 2.0 Array		90	0
	E-MTAB-1727	25189482	tissue	Affymetrix Human Genome U133 Plus 2.0 Array		0	93
Methylation	GSE36216	22261801	cell line	Illumina Infinium HumanMethylation450	69			6
	DBTSS (DRA001841)	25378318	cell line	BS-seq	26			0
	TCGA LUAD	25079552	tissue	Illumina Infinium HumanMethylation450	431			31
	TCGA LUSC	22960745	tissue	Illumina Infinium HumanMethylation450	359			42
Histone	DBTSS (DRA001860/DRA002311)	25378318	cell line	ChIP-seq	26			0

## Sheet: S3
Supplementary Table S3: Differentially expressed promoters in FANTOM5 NSCLC cell lines.
DPI	Promoter	Gene symbol	Transcript	logFC	logCPM	FDR	UP/DOWN	ON/OFF	Annotation	TCGA LUAD	TCGA LUSC	TCGA LUAD	TCGA LUSC
chr6:87804815..87804830,-	p1@CGA	CGA	ENSG00000135346.8	11.7072	6.13533	0.000253544	UP	ON	protein coding	UP	UP		ON
chr12:86268065..86268080,+	p1@NTS	NTS	ENSG00000133636.10	11.0293	6.56095	3.29796e-05	UP		protein coding	UP	UP	OFF
chr2:211421314..211421335,+	p1@CPS1	CPS1	ENSG00000021826.14	10.8493	5.2984	0.000298383	UP	ON	protein coding	UP	UP	ON	ON
chr11:14993888..14993903,-	p1@CALCA	CALCA	ENSG00000110680.12	10.7923	6.89791	0.00166965	UP		protein coding	UP	UP		OFF
chrM:647..659,+	p@chrM:647..659,+	MT-TF	ENSG00000211459.2	10.0813	5.99295	7.9047e-05	UP		other
chr7:40833016..40833066,+	p2@C7orf10	C7orf10	ENSG00000175600.15	10.06	4.53174	0.00239637	UP		protein coding	UP	UP
chr10:81370689..81370700,+	p4@SFTPA1	SFTPA1		10.014	4.49929	0.00531313	UP		protein coding	DOWN	DOWN
chr6:166582133..166582149,-	p1@T	T		9.87578	4.36341	0.00555608	UP		protein coding	UP	UP	ON	ON
chr19:39313478..39313484,+	p@chr19:39313478..39313484,+	AC104534.2	NA	9.71841	4.21465	2.05139e-05	UP	ON	antisense	NA	NA	NA	NA
chrX:55246771..55246793,+	p1@PAGE5	PAGE5	ENSG00000158639.12	9.47968	3.98483	0.00253858	UP		protein coding	UP	UP
chr11:62475140..62475195,+	p1@GNG3	GNG3		9.44626	3.90361	0.00979738	UP		protein coding		UP		ON
chr7:1781906..1781951,-	p1@ENST00000415399,p1@ENST00000453348	AC074389.9	ENSG00000236081.1	9.39683	3.90862	4.06769e-06	UP	ON	linc	UP	UP	ON	ON
chr14:24105566..24105579,+	p1@DHRS2	DHRS2	ENSG00000100867.14	9.33172	4.49312	9.69877e-06	UP	ON	protein coding	UP	UP	OFF
chr18:70211559..70211587,-	p2@CBLN2	CBLN2		9.31076	3.77239	0.00587266	UP		protein coding	UP	UP
chr2:228244013..228244027,-	p1@TM4SF20	TM4SF20		9.30036	3.82021	0.00678686	UP		protein coding	UP
chr1:18081804..18081883,+	p1@ACTL8	ACTL8	ENSG00000117148.7	9.25855	3.78391	0.000552508	UP	ON	protein coding	UP	UP	ON	ON
chr2:224588775..224588778,-	p@chr2:224588775..224588778,-		NA	9.23678	3.73962	1.5593e-05	UP	ON	protein coding	NA	NA	NA	NA
chr18:56887381..56887399,+	p1@GRP	GRP		9.19894	4.44514	0.00773312	UP		protein coding	DOWN	UP	OFF	OFF
chr8:120651070..120651091,-	p1@ENPP2	ENPP2	ENSG00000136960.12	9.17822	3.64529	0.00205348	UP	ON	protein coding	DOWN	DOWN
chr9:138413277..138413293,+	p1@LCN1	LCN1		9.15599	3.68525	0.00712845	UP		protein coding	UP			ON
chr2:224467068..224467085,-	p1@SCG2	SCG2	ENSG00000171951.4	9.09902	6.43352	8.34831e-05	UP	ON	protein coding	UP	UP
chr13:36429787..36429812,-	p1@DCLK1	DCLK1	ENSG00000133083.14	9.04445	3.56795	6.80084e-05	UP	ON	protein coding	UP
chr6:166401402..166401431,-	p3@LINC00473	LINC00473	ENSG00000223414.2	9.03641	3.56892	1.35058e-05	UP	ON	linc	UP		ON
chr5:173472676..173472732,+	p1@HMP19	NSG2		9.03552	3.50592	0.0112166	UP		protein coding	NA	NA	NA	NA
chr22:22901636..22901715,-	p1@PRAME	PRAME	ENSG00000185686.17	8.9754	3.50787	1.60124e-09	UP	ON	protein coding	UP	UP	ON	ON
chr7:50628762..50628778,-	p2@DDC	DDC		8.93348	3.40806	0.0072117	UP		protein coding	UP	UP	OFF	OFF
chr10:101542384..101542406,+	p2@ABCC2	ABCC2	ENSG00000023839.10	8.92915	4.06414	7.86014e-05	UP	ON	protein coding	UP	UP
chr12:26126681..26126692,+	p8@RASSF8	RASSF8		8.86649	3.42513	0.00797288	UP		protein coding	DOWN	DOWN
chr21:41239344..41239371,+	p1@PCP4	PCP4		8.84898	3.32709	0.00683179	UP		protein coding	UP	UP	ON
chr5:175298573..175298628,+	p1@CPLX2	CPLX2	ENSG00000145920.14	8.84871	3.36516	0.00132893	UP	ON	protein coding	UP	UP	OFF	OFF
chr11:117695449..117695466,-	p1@FXYD2	FXYD2		8.82211	4.12524	0.0061895	UP		protein coding	UP	UP	OFF	OFF
chr4:74586784..74586789,-	p@chr4:74586784..74586789,-		NA	8.81594	4.95864	0.00676306	UP		linc	NA	NA	NA	NA
chr10:5060184..5060198,-	p3@AKR1C2	AKR1C2	ENSG00000151632.16	8.81186	3.30196	0.000755581	UP	ON	protein coding	UP	UP	ON	ON
chr2:224467093..224467104,-	p2@SCG2	SCG2	ENSG00000171951.4	8.75053	3.23575	0.00102141	UP	ON	protein coding	UP	UP
chr17:25416268..25416287,-	p@chr17:25416268..25416287,-		NA	8.72795	3.26376	0.000336692	UP	ON	linc	NA	NA	NA	NA
chr18:40857447..40857461,-	p1@SYT4	SYT4		8.68839	3.17286	0.0127141	UP		protein coding			OFF	OFF
chr5:136896379..136896398,-	p@chr5:136896379..136896398,-	SPOCK1		8.67615	3.24405	0.00572519	UP		protein coding gene body	UP	UP	ON
chr13:111618030..111618074,+	p@chr13:111618030..111618074,+		NA	8.6407	3.20927	3.05244e-05	UP	ON	linc	NA	NA	NA	NA
chr4:7755797..7755812,+	p1@AFAP1-AS1	AFAP1-AS1	ENSG00000272620.1	8.63089	4.75789	2.73499e-08	UP	ON	antisense	UP	UP	ON	ON
chr9:75567962..75567979,-	p1@ALDH1A1	ALDH1A1	ENSG00000165092.12	8.60575	7.97059	6.50296e-06	UP		protein coding
chr17:41836153..41836161,-	p1@SOST	SOST		8.56348	3.10797	0.00422988	UP		protein coding		UP
chr10:101542462..101542535,+	p1@ABCC2	ABCC2	ENSG00000023839.10	8.53222	3.11307	0.000852367	UP	ON	protein coding	UP	UP
chr10:5060148..5060171,-	p2@AKR1C2	AKR1C2	ENSG00000151632.16	8.51024	3.66621	0.000538221	UP	ON	protein coding	UP	UP	ON	ON
chr8:52307771..52307797,+	p@chr8:52307771..52307797,+		NA	8.50448	4.60566	0.000677642	UP		lncrna	NA	NA	NA	NA
chr20:17207665..17207699,+	p1@PCSK2	PCSK2	ENSG00000125851.9	8.43454	2.97217	0.00321279	UP		protein coding	UP		OFF	OFF
chr3:124653579..124653601,-	p1@MUC13	MUC13	ENSG00000173702.7	8.42797	3.01883	0.000300096	UP	ON	protein coding	UP	UP
chr9:137979506..137979530,+	p1@OLFM1	OLFM1	ENSG00000130558.18	8.42162	2.99953	0.000552721	UP	ON	protein coding		UP
chr12:1920892..1920943,-	p1@CACNA2D4	CACNA2D4	ENSG00000151062.14	8.41909	4.33796	0.00590465	UP		protein coding
chr15:51973680..51973707,+	p1@SCG3	SCG3		8.38108	2.88211	0.00663069	UP		protein coding	UP	UP	OFF	OFF
chrX:86983649..86983684,-	p@chrX:86983649..86983684,-		NA	8.35375	2.93011	0.000851479	UP	ON	linc	NA	NA	NA	NA
chr8:27850180..27850202,-	p1@SCARA5	SCARA5		8.34118	2.94273	0.00997958	UP		protein coding	DOWN	DOWN	OFF	OFF
chr20:10199566..10199582,+	p2@SNAP25	SNAP25	ENSG00000132639.12	8.32857	2.8472	0.000250264	UP	ON	protein coding	UP
chr7:158226043..158226065,+	p@chr7:158226043..158226065,+			8.32013	3.52162	0.0049217	UP		lncrna	NA	NA	NA	NA
chr2:233352531..233352550,-	p1@ECEL1	ECEL1	ENSG00000171551.11	8.31533	2.86677	0.0020187	UP	ON	protein coding	UP	UP	ON	ON
chr11:69518781..69518797,-	p1@FGF19	FGF19	NA	8.31378	4.91964	0.00871488	UP		protein coding	UP	UP	ON	ON
chr11:1151573..1151590,+	p1@MUC5AC	MUC5AC	ENSG00000215182.6	8.26908	2.8815	0.000863009	UP	ON	protein coding	NA	NA	NA	NA
chr8:53166899..53166914,-	p3@ST18	ST18		8.26094	2.76794	0.0150619	UP		protein coding	UP	UP	ON
chr9:119051028..119051054,-	p1@ENST00000438048	PAPPA-AS2	ENSG00000226604.2	8.25221	2.84715	0.00274219	UP		antisense
chr5:142638718..142638753,+	p@chr5:142638718..142638753,+		NA	8.25003	2.86966	0.00248104	UP		lncrna	NA	NA	NA	NA
chr6:166401442..166401508,-	p2@LINC00473	LINC00473	ENSG00000223414.2	8.22481	3.5609	0.000122654	UP	ON	linc	UP		ON
chrX:30233668..30233698,+	p1@MAGEB2	MAGEB2	ENSG00000099399.5	8.21065	2.82871	0.00465443	UP		protein coding	UP	UP		ON
chr3:55002193..55002225,+	p@chr3:55002193..55002225,+	CACNA2D3		8.2102	2.80401	0.0106103	UP		protein coding gene body		UP
chr6:166581333..166581349,-	p2@T	T		8.18881	2.80772	0.0107083	UP		protein coding	UP	UP	ON	ON
chr17:5522731..5522749,-	p@chr17:5522731..5522749,-	NLRP1	ENSG00000091592.15	8.18679	2.79042	0.00158415	UP	ON	protein coding
chr5:58883433..58883475,-	p@chr5:58883433..58883475,-	PDE4D	NA	8.18334	2.78142	0.00113085	UP	ON	protein coding gene body		DOWN
chr15:40366561..40366568,-	p@chr15:40366561..40366568,-		NA	8.17864	2.79318	0.000656532	UP	ON	not annotated	NA	NA	NA	NA
chr5:132948193..132948209,-	p1@FSTL4	FSTL4	ENSG00000053108.16	8.15963	2.77857	0.000336218	UP	ON	protein coding	UP	UP
chr2:234590530..234590553,+	p1@UGT1A7	UGT1A7	ENSG00000244122.2	8.15486	3.54606	0.00502517	UP		protein coding	UP	UP		ON
chr4:88896857..88896874,+	p1@SPP1	SPP1	ENSG00000118785.13	8.14474	8.45702	1.4856e-05	UP		protein coding	UP	UP
chr1:240775447..240775462,-	p1@GREM2	GREM2	ENSG00000180875.4	8.12791	3.20344	0.000286881	UP	ON	protein coding		DOWN		OFF
chr8:32579341..32579372,+	p2@NRG1	NRG1	ENSG00000157168.14	8.08722	3.17589	0.00079285	UP	ON	protein coding	DOWN
chr15:22550751..22550779,+	p@chr15:22550751..22550779,+			8.05544	2.69071	0.0113626	UP		pseudogene	NA	NA	NA	NA
chr6:141219534..141219572,-	p@chr6:141219534..141219572,-		NA	8.02925	2.66069	2.74008e-07	UP	ON	linc	NA	NA	NA	NA
chrX:115594126..115594143,-	p1@CXorf61	CXorf61	ENSG00000204019.4	8.01839	2.66004	3.11872e-05	UP	ON	protein coding	UP	UP	ON	ON
chr5:95768919..95768964,-	p1@PCSK1	PCSK1		8.0097	2.53345	0.0167242	UP		protein coding	UP	UP	ON	ON
chr6:56607178..56607207,-	p@chr6:56607178..56607207,-	DST	NA	7.97391	2.62624	0.000116384	UP	ON	protein coding	DOWN
chr20:20348740..20348757,+	p1@INSM1	INSM1	ENSG00000173404.4	7.97055	2.50126	0.00592537	UP		protein coding	UP	UP
chr6:166401530..166401566,-	p1@LINC00473	LINC00473	ENSG00000223414.2	7.96302	2.60289	0.000165996	UP	ON	linc	UP		ON
chr18:70210764..70210794,-	p1@CBLN2	CBLN2		7.95455	2.48359	0.0102691	UP		protein coding	UP	UP
chr12:1609684..1609705,+	p1@LOC100292680		NA	7.92373	2.55382	0.00034593	UP	ON	linc	NA	NA	NA	NA
chr20:61297994..61298009,-	p1@ENST00000451648	RP11-93B14.5	ENSG00000232803.1	7.92047	2.57545	0.00175417	UP	ON	antisense	UP
chr9:87024410..87024417,+	p@chr9:87024410..87024417,+			7.91151	2.55156	0.00834505	UP		linc	NA	NA	NA	NA
chr11:62474803..62474875,-	p3@BSCL2	BSCL2		7.89856	3.42848	0.0134292	UP		protein coding
chr2:108602971..108602986,+	p1@SLC5A7	SLC5A7		7.88924	2.42216	0.0176486	UP		protein coding	DOWN	UP	OFF	OFF
chr17:46692457..46692484,-	p2@HOXB8	HOXB8	ENSG00000120068.6	7.86776	2.47769	0.00203504	UP	ON	protein coding	UP	UP
chr9:75567949..75567960,-	p2@ALDH1A1	ALDH1A1	ENSG00000165092.12	7.86474	4.72256	0.000114009	UP		protein coding
chr17:46703687..46703740,-	p1@HOXB9	HOXB9	ENSG00000170689.9	7.85926	3.18741	7.50463e-06	UP	ON	protein coding	UP	UP	ON	ON
chr5:57877973..57878025,+	p2@RAB3C	RAB3C	ENSG00000152932.7	7.82965	2.48548	0.00332309	UP	ON	protein coding	UP			OFF
chr7:45928079..45928095,+	p1@IGFBP1	IGFBP1	ENSG00000146678.9	7.82188	4.07432	0.00158553	UP	ON	protein coding	UP	UP
chr18:40857329..40857357,-	p2@SYT4	SYT4		7.8085	2.34803	0.0182788	UP		protein coding			OFF	OFF
chr4:93512357..93512364,+	p@chr4:93512357..93512364,+	GRID2		7.8085	2.34803	0.0182788	UP		protein coding gene body			OFF
chr2:233385266..233385306,+	p2@PRSS56	PRSS56		7.78754	2.44626	0.0129026	UP		protein coding	NA	NA	NA	NA
chr2:115919726..115919782,+	p1@DPP10	DPP10	ENSG00000175497.16	7.77681	2.37733	0.00333381	UP	ON	protein coding	UP	UP	OFF	OFF
chr19:39989580..39989598,+	p1@DLL3	DLL3		7.76955	2.31438	0.0080054	UP		protein coding	UP	UP	ON	ON
chr16:80926478..80926494,-	p1@uc002fft.1	RP11-314O13.1	ENSG00000260896.5	7.76566	2.42881	0.00255824	UP		linc	NA	NA	NA	NA
chr21:42558703..42558723,-	p1@ENST00000440221	PLAC4	ENSG00000225745.8	7.76258	2.42904	0.00253152	UP	ON	antisense	UP	UP		OFF
chr7:100808843..100808858,-	p1@VGF	VGF	ENSG00000128564.6	7.75458	7.12267	2.5467e-06	UP		protein coding	UP	UP	ON	ON
chr11:15095131..15095148,+	p1@CALCB	CALCB	ENSG00000175868.13	7.73881	2.86439	0.00460252	UP		protein coding	UP	UP		ON
chr3:149192475..149192496,+	p1@TM4SF4	TM4SF4		7.73793	2.41773	0.0132097	UP		protein coding	UP	DOWN	OFF	OFF
chr12:103351444..103351461,+	p1@ASCL1	ASCL1		7.73683	4.11581	0.0093267	UP		protein coding	UP	UP
chr17:63556428..63556442,-	p1@AXIN2	AXIN2		7.73514	2.38641	0.00565853	UP		protein coding		DOWN
chr12:66035928..66035945,-	p1@ENST00000535315,p1@ENST00000537298	RP11-230G5.2	ENSG00000250748.6	7.73442	2.42747	0.00329217	UP		linc	NA	NA	NA	NA
chr13:107029084..107029103,+	p4@LINC00460	LINC00460	ENSG00000233532.5	7.72021	2.95742	0.000726465	UP	ON	linc	NA	NA	NA	NA
chr1:144944671..144944674,+	p1@ENST00000410856	RNU2-38P	ENSG00000222788.1	7.70697	3.33266	1.44814e-06	UP	ON	small ncRNAs			ON	ON
chr13:110076646..110076651,+	p@chr13:110076646..110076651,+		NA	7.65974	2.34204	0.000506617	UP	ON	not annotated	NA	NA	NA	NA
chr14:29047309..29047323,+	p@chr14:29047309..29047323,+		NA	7.64291	3.17007	3.53583e-06	UP	ON	linc	NA	NA	NA	NA
chr4:163085141..163085162,-	p1@FSTL5	FSTL5		7.64051	3.15397	0.0059436	UP	ON	protein coding	UP	UP		ON
chr17:66287258..66287276,-	p1@SLC16A6	SLC16A6	ENSG00000108932.11	7.63839	2.33059	0.000163671	UP	ON	protein coding	DOWN	DOWN
chr1:146989697..146989701,-	p1@LOC100289211	LINC00624		7.6169	2.2986	0.00563767	UP		linc	NA	NA	NA	NA
chr1:246033769..246033788,-	p@chr1:246033769..246033788,-	SMYD3		7.61294	2.28119	0.0140743	UP		protein coding gene body
chr1:197148192..197148228,-	p@chr1:197148192..197148228,-	ZBTB41	NA	7.59353	2.29281	0.00106571	UP	ON	protein coding gene body
chr1:149824160..149824183,+	p1@HIST2H3A,p1@HIST2H3C,p1@HIST2H3D	HIST2H3A	ENSG00000203852.3	7.58181	5.31806	2.04482e-05	UP		protein coding	NA	NA
chr4:161747552..161747607,-	p@chr4:161747552..161747607,-		NA	7.58001	2.27812	0.00275802	UP		linc	NA	NA	NA	NA
chr10:4828859..4828883,+	p6@AKR1E2	AKR1E2	ENSG00000165568.17	7.57681	2.29433	0.00498056	UP		protein coding	UP	UP
chr6:169691363..169691375,-	p@chr6:169691363..169691375,-			7.56426	2.23968	0.0144381	UP		linc	NA	NA	NA	NA
chr12:7521974..7522019,-	p1@CD163L1	CD163L1	ENSG00000177675.8	7.55956	3.78741	1.17143e-05	UP	ON	protein coding
chr15:21905826..21905834,-	p@chr15:21905826..21905834,-		NA	7.54866	2.24565	0.000700048	UP	ON	pseudogene	NA	NA	NA	NA
chr7:107883821..107883841,-	p7@NRCAM	NRCAM		7.51872	2.2331	0.0147804	UP		protein coding		UP
chrX:151081351..151081390,+	p1@MAGEA4	MAGEA4	ENSG00000147381.11	7.51632	2.20621	0.00337013	UP		protein coding	UP	UP	ON	ON
chr7:40832998..40833012,+	p3@C7orf10	C7orf10	ENSG00000175600.15	7.51159	2.99901	0.00442667	UP		protein coding	UP	UP
chr6:53481796..53481815,-	p1@ENST00000502390,p1@ENST00000506206,p1@ENST00000510846	GCLC	ENSG00000231683.6	7.50891	3.31082	0.00010756	UP	ON	protein coding	UP	UP
chr5:175298512..175298532,+	p4@CPLX2	CPLX2	ENSG00000145920.14	7.50421	2.18561	0.00504684	UP		protein coding	UP	UP	OFF	OFF
chr19:51471925..51471946,-	p4@KLK6	KLK6	ENSG00000167755.13	7.49214	2.11757	0.00253742	UP	ON	protein coding	UP	UP	ON	ON
chr2:191625222..191625228,-	p@chr2:191625222..191625228,-		NA	7.49202	3.66755	1.73503e-05	UP	ON	linc	NA	NA	NA	NA
chrX:142113711..142113717,+	p1@SPANXN4	SPANXN4		7.4888	2.2073	0.0150165	UP		protein coding		NA
chr7:92855762..92855790,-	p1@HEPACAM2	HEPACAM2		7.4839	2.05438	0.0212141	UP		protein coding	UP	UP
chr1:246382967..246382990,-	p@chr1:246382967..246382990,-	SMYD3		7.47346	2.04507	0.0213243	UP		protein coding gene body
chr5:38595498..38595514,-	p2@LIFR	LIFR		7.47212	2.17855	0.015123	UP		protein coding	DOWN	DOWN
chr12:71551772..71551786,-	p2@TSPAN8	TSPAN8	ENSG00000127324.8	7.46783	3.54525	0.000182025	UP		protein coding	UP
chr13:24528588..24528596,+	p@chr13:24528588..24528596,+		NA	7.46149	2.15094	0.00244738	UP	ON	linc	NA	NA	NA	NA
chr3:117716418..117716433,-	p1@ENST00000484092	LSAMP	ENSG00000239268.2	7.45745	2.13597	0.000932388	UP	ON	protein coding	DOWN	DOWN
chr11:123325343..123325357,+	p1@ENST00000525757,p1@uc001pyv.1	LINC01059	ENSG00000023171.14	7.4543	4.01797	6.32574e-05	UP		linc	NA	NA	NA	NA
chrX:151080929..151080974,+	p2@MAGEA4	MAGEA4	ENSG00000147381.11	7.44719	2.14696	0.00395619	UP		protein coding	UP	UP	ON	ON
chr1:203144944..203144961,-	p1@MYBPH	MYBPH	ENSG00000133055.8	7.44493	2.14144	0.00256341	UP	ON	protein coding	UP
chr12:79439461..79439490,+	p2@SYT1	SYT1	ENSG00000067715.13	7.42977	2.07597	0.000479732	UP	ON	protein coding	UP	UP
chr10:5138548..5138561,+	p@chr10:5138548..5138561,+	AKR1C3	ENSG00000196139.12	7.42348	2.1353	0.00222627	UP	ON	protein coding	UP	UP
chr6:130088354..130088379,-	p@chr6:130088354..130088379,-		NA	7.41727	2.15192	0.00453382	UP		not annotated	NA	NA	NA	NA
chr18:5478350..5478363,-	p10@EPB41L3	EPB41L3		7.41029	2.14227	0.0156774	UP		protein coding gene body		DOWN
chr12:1609708..1609723,+	p2@LOC100292680		NA	7.40427	2.11265	0.00137616	UP	ON	linc	NA	NA	NA	NA
chr3:120401043..120401138,-	p1@HGD	HGD	ENSG00000113924.11	7.39881	2.13323	0.00377634	UP	ON	protein coding	UP	UP		OFF
chr2:75751179..75751194,+	p1@BC018659	AC007099.1	ENSG00000231172.2	7.3752	2.08282	0.00269297	UP	ON	antisense			ON
chr19:43690679..43690695,-	p1@PSG5	PSG5	ENSG00000204941.13	7.37506	2.09928	0.00131009	UP	ON	protein coding	UP	UP	ON	ON
chr13:24144896..24144956,+	p3@TNFRSF19	TNFRSF19	ENSG00000127863.15	7.36066	2.06777	0.00745136	UP		protein coding
chr4:66536196..66536216,-	p2@EPHA5	EPHA5	ENSG00000145242.13	7.34249	2.026	0.00279236	UP	ON	protein coding	UP			OFF
chr12:54867352..54867392,-	p1@GTSF1	GTSF1	ENSG00000170627.9	7.34057	2.06929	0.0036943	UP		protein coding	UP	UP		OFF
chr17:66077866..66077872,+	p@chr17:66077866..66077872,+			7.33405	2.06154	0.00178467	UP	ON	pseudogene	NA	NA	NA	NA
chr6:25726781..25726797,-	p1@HIST1H2AA	HIST1H2AA		7.33102	2.85438	0.0125504	UP		protein coding			ON
chr11:106266838..106266843,+	p@chr11:106266838..106266843,+			7.32968	2.05791	0.016317	UP		linc	NA	NA	NA	NA
chr1:18085810..18085839,+	p@chr1:18085810..18085839,+	ACTL8	NA	7.32767	2.08305	0.00583004	UP		protein coding gene body	UP	UP	ON	ON
chr10:92055064..92055067,+	p@chr10:92055064..92055067,+		NA	7.31963	2.06549	0.0118631	UP		not annotated	NA	NA	NA	NA
chr2:12246664..12246694,+	p1@ENST00000449986	AC096559.1	ENSG00000224184.5	7.31512	2.74981	0.00639432	UP		linc	NA	NA	NA	NA
chr9:31848654..31848709,+	p@chr9:31848654..31848709,+		NA	7.29941	2.02625	0.00215704	UP	ON	linc	NA	NA	NA	NA
chr10:81320162..81320168,-	p1@SFTPA1,p1@SFTPA2	SFTPA2		7.29917	2.06743	0.0165932	UP		protein coding	DOWN	DOWN
chr11:62474885..62474903,-	p5@BSCL2	BSCL2		7.29526	1.8875	0.023232	UP		protein coding
chr11:31832658..31832681,-	p1@PAX6	PAX6	ENSG00000007372.20	7.27522	2.00247	7.27647e-06	UP	ON	protein coding	DOWN	UP
chr12:114211448..114211463,-	p1@ENST00000510694,p1@ENST00000550223	RP11-438N16.1	ENSG00000249550.6	7.27219	1.98586	6.60918e-06	UP	ON	linc	NA	NA	NA	NA
chrX:45474991..45474996,+	p@chrX:45474991..45474996,+	RP11-245M24.1		7.26975	2.04696	0.00626276	UP		linc	NA	NA	NA	NA
chr3:55002230..55002244,+	p@chr3:55002230..55002244,+	CACNA2D3		7.25407	1.9797	0.017062	UP		protein coding gene body		UP
chr7:106415457..106415472,+	p1@ENST00000490162	RP5-884M6.1	ENSG00000228742.9	7.25369	2.01176	3.56281e-07	UP	ON	linc	NA	NA	NA	NA
chr13:79177674..79177701,-	p1@POU4F1	POU4F1	ENSG00000152192.7	7.24465	2.58301	0.000115596	UP	ON	protein coding	UP	UP	ON	ON
chr4:90228910..90228960,-	p1@GPRIN3	GPRIN3	ENSG00000185477.4	7.23305	1.99328	0.00332275	UP	ON	protein coding		DOWN		ON
chr7:155250249..155250278,+	p3@EN2		NA	7.22165	1.94389	1.48056e-05	UP	ON	not annotated	NA	NA	NA	NA
chr20:5892147..5892163,+	p1@CHGB	CHGB	ENSG00000089199.9	7.21873	2.47287	4.21612e-05	UP	ON	protein coding	UP	UP
chr12:71551564..71551596,-	p1@TSPAN8	TSPAN8	ENSG00000127324.8	7.21501	2.755	0.0097826	UP	ON	protein coding	UP
chr5:94027855..94027904,+	p2@ANKRD32	ANKRD32	ENSG00000133302.12	7.21284	2.55513	0.000531532	UP	ON	protein coding	UP
chr5:102143894..102143910,+	p6@PAM	PAM		7.21142	1.81576	0.0171496	UP		protein coding
chr15:75356166..75356171,+	p@chr15:75356166..75356171,+	PPCDC	NA	7.20515	1.97108	0.00441369	UP	ON	protein coding gene body
chrX:29686367..29686386,+	p@chrX:29686367..29686386,+	IL1RAPL1		7.16782	1.90889	0.0179318	UP		protein coding gene body
chr5:10502793..10502819,-	p1@ENST00000515243	RP11-1C1.4	ENSG00000249396.1	7.16594	1.94274	0.00632562	UP	ON	linc			ON	ON
chr13:107028964..107028978,+	p2@LINC00460	LINC00460	ENSG00000233532.5	7.16173	2.84552	0.000357501	UP	ON	linc	NA	NA	NA	NA
chr4:147866993..147867021,-	p1@TTC29	TTC29		7.15638	1.9	0.0114358	UP		protein coding	DOWN	DOWN	OFF	OFF
chr1:14746465..14746470,-	p@chr1:14746465..14746470,-			7.156	1.86432	0.0148069	UP		linc	NA	NA	NA	NA
chr7:14028488..14028516,-	p2@ETV1	ETV1	ENSG00000006468.13	7.15268	1.93599	5.25987e-05	UP	ON	protein coding	DOWN	DOWN
chr2:176973498..176973524,+	p1@HOXD10	AC009336.1	ENSG00000128710.5	7.14763	1.8577	0.0060365	UP		small ncRNAs		UP		ON
chr4:88450511..88450533,-	p1@SPARCL1	SPARCL1		7.14723	1.86192	0.0205563	UP		protein coding	DOWN	DOWN
chrX:151903207..151903234,+	p1@CSAG1	CSAG1	ENSG00000198930.12	7.14617	1.84185	0.00130226	UP	ON	protein coding	UP	UP	ON	ON
chr7:57509877..57509895,+	p1@ZNF716	ZNF716	ENSG00000182111.8	7.14334	1.93133	0.00447261	UP		protein coding	UP	UP	ON	ON
chr21:39493574..39493607,+	p1@DSCR8	DSCR8	ENSG00000198054.11	7.13102	1.91204	0.00865146	UP		protein coding	UP	UP	ON	ON
chr15:22550789..22550806,+	p@chr15:22550789..22550806,+			7.1168	1.90392	0.0183796	UP		pseudogene	NA	NA	NA	NA
chr20:62130428..62130472,-	p1@EEF1A2	EEF1A2	ENSG00000101210.10	7.11339	5.64841	1.27239e-11	UP		protein coding	UP	UP
chrX:151903253..151903273,+	p2@CSAG1	CSAG1	ENSG00000198930.12	7.11191	1.80971	0.00125428	UP	ON	protein coding	UP	UP	ON	ON
chr7:56516044..56516102,-	p1@LOC650226	RP13-492C18.2	ENSG00000237268.2	7.09727	1.84391	0.000657433	UP	ON	pseudogene
chr17:20771833..20771846,+	p1@ENST00000439794	RP11-344E13.3	ENSG00000233098.8	7.09068	1.86412	0.00223894	UP	ON	antisense	NA	NA	NA	NA
chr19:48753064..48753095,-	p1@CARD8	CARD8	ENSG00000105483.16	7.08943	2.59238	0.00135989	UP	ON	protein coding		DOWN
chr8:55074639..55074655,+	p@chr8:55074639..55074655,+			7.0883	2.76415	0.0141482	UP		linc	NA	NA	NA	NA
chr3:238969..239006,+	p3@CHL1	CHL1		7.07413	1.86962	0.0091055	UP		protein coding	UP			ON
chr2:29353520..29353557,+	p8@CLIP4	CLIP4	ENSG00000115295.19	7.07075	1.84047	4.48939e-05	UP	ON	protein coding
chr3:174577105..174577136,+	p2@NAALADL2	NAALADL2	ENSG00000177694.14	7.07073	2.75581	3.93185e-05	UP	ON	protein coding	UP
chr4:31998999..31999004,+	p1@ENST00000513211	RP11-734I18.1	ENSG00000251129.1	7.0684	1.84385	0.001391	UP	ON	linc	UP	UP	ON	ON
chr18:64271316..64271334,-	p1@CDH19	CDH19	ENSG00000071991.8	7.06657	1.74262	0.00708726	UP		protein coding	DOWN	DOWN	OFF	OFF
chr9:87284622..87284653,+	p3@NTRK2	NTRK2	ENSG00000148053.15	7.04162	1.77864	0.0119663	UP		protein coding	DOWN	UP
chr8:128258299..128258301,-	p@chr8:128258299..128258301,-			7.03942	1.85164	0.00610391	UP	ON	not annotated	NA	NA	NA	NA
chr2:233385234..233385255,+	p4@PRSS56	PRSS56		7.03608	1.82211	0.0192712	UP		protein coding	NA	NA	NA	NA
chr10:1779710..1779726,-	p2@ADARB2	ADARB2	ENSG00000185736.15	7.03346	2.24323	0.00185566	UP	ON	protein coding			OFF	OFF
chr10:4823096..4823144,-	p@chr10:4823096..4823144,-		NA	7.02597	1.85243	0.00933291	UP		linc	NA	NA	NA	NA
chr12:131438426..131438439,+	p3@GPR133	GPR133		7.01879	1.82609	0.0194284	UP		protein coding	DOWN	DOWN
chr20:43344001..43344020,+	p1@WISP2	WISP2	ENSG00000064205.10	7.01669	3.13577	0.000632926	UP		protein coding	DOWN	DOWN	ON
chr14:60337478..60337544,-	p2@RTN1	RTN1	ENSG00000139970.16	7.01657	2.92936	0.000101965	UP	ON	protein coding	DOWN	DOWN	ON
chr6:25726986..25727039,+	p1@HIST1H2BA	HIST1H2BA	ENSG00000146047.5	7.01556	4.02102	0.0125649	UP		protein coding	UP		ON
chr19:54024369..54024390,+	p22@ZNF331	ZNF331		6.99684	1.79091	0.0133944	UP		protein coding	DOWN	DOWN
chr5:177302520..177302548,+	p1@ENST00000506672	RP11-423H2.1	ENSG00000170089.15	6.99211	1.74538	0.00263813	UP	ON	pseudogene	NA	NA	NA	NA
chr3:63805044..63805054,+	p1@C3orf49	C3orf49		6.97854	1.7944	0.0199418	UP		protein coding		DOWN		OFF
chr1:166958538..166958552,+	p2@MAEL	MAEL		6.97491	1.77085	0.0200447	UP		protein coding	UP	UP
chr17:9739681..9739708,+	p5@GLP2R	GLP2R	NA	6.97062	1.78504	0.00649386	UP	ON	protein coding		DOWN	OFF	OFF
chr7:102613762..102613772,-	p4@FBXL13	FBXL13	ENSG00000161040.16	6.96452	1.78398	5.52579e-05	UP	ON	protein coding				OFF
chr5:33794920..33794939,-	p@chr5:33794920..33794939,-	ADAMTS12	NA	6.96447	1.78671	0.0060131	UP	ON	protein coding gene body	UP	UP	ON
chr2:154449516..154449549,-	p1@ENST00000424322	AC012501.2	ENSG00000227400.2	6.95511	1.74812	0.000168607	UP	ON	lncrna		UP	ON	ON
chr8:104384724..104384782,+	p3@CTHRC1	CTHRC1	ENSG00000164932.12	6.95376	1.74208	0.00147698	UP	ON	protein coding	UP	UP
chr2:183291741..183291771,-	p1@PDE1A	PDE1A	ENSG00000115252.18	6.95154	1.76756	0.000222063	UP	ON	protein coding
chr16:1922109..1922181,-	p1@C16orf73	MEIOB	ENSG00000162039.14	6.94805	2.79873	0.00357795	UP	ON	protein coding	NA	NA	NA	NA
chr4:95263977..95264006,-	p1@HPGDS	HPGDS		6.94645	1.76925	0.0202856	UP		protein coding	DOWN	DOWN
chr6:73934119..73934140,-	p@chr6:73934119..73934140,-	RP11-257K9.8		6.94583	1.77334	0.00699128	UP		protein coding gene body	NA	NA	NA	NA
chr19:48753141..48753160,-	p3@CARD8	CARD8	ENSG00000105483.16	6.94104	1.78223	0.00440066	UP		protein coding		DOWN
chr1:159046532..159046595,-	p1@AIM2	AIM2	ENSG00000163568.13	6.93803	1.76627	0.000897514	UP	ON	protein coding	UP	UP		ON
chr2:188378374..188378387,-	p3@TFPI	TFPI	ENSG00000003436.14	6.93219	2.29705	0.000689468	UP	ON	protein coding		DOWN
chr19:42498369..42498390,-	p1@ATP1A3	ATP1A3	ENSG00000105409.15	6.92928	3.83633	0.000517056	UP		protein coding	UP	UP
chr10:101542439..101542457,+	p3@ABCC2	ABCC2	ENSG00000023839.10	6.92594	2.1617	0.000449047	UP	ON	protein coding	UP	UP
chr22:43739340..43739385,-	p1@SCUBE1	SCUBE1	ENSG00000159307.18	6.91847	2.29347	0.00378011	UP	ON	protein coding	DOWN	DOWN		OFF
chr6:158448114..158448159,+	p1@AK026758	SYNJ2	NA	6.91685	1.71036	0.00425294	UP	ON	protein coding gene body	UP	UP
chr15:69373210..69373239,+	p1@LINC00277	LINC00277	ENSG00000259222.2	6.90433	1.72907	0.0123535	UP		linc
chr6:148761457..148761478,+	p8@SASH1	SASH1	ENSG00000111961.16	6.87923	1.74007	0.0115256	UP		protein coding	DOWN	DOWN
chr2:108363394..108363398,-	p@chr2:108363394..108363398,-		NA	6.87396	1.71262	0.00506029	UP		not annotated	NA	NA	NA	NA
chr2:234590556..234590568,+	p2@UGT1A7	UGT1A7	ENSG00000244122.2	6.87014	2.25719	0.00741561	UP		protein coding	UP	UP		ON
chr4:90229142..90229217,-	p2@GPRIN3	GPRIN3	ENSG00000185477.4	6.85712	1.69196	0.00271087	UP	ON	protein coding		DOWN		ON
chr8:124749609..124749658,-	p1@ANXA13	ANXA13		6.8454	1.69187	0.021539	UP		protein coding	UP	UP
chr6:27791862..27791877,+	p10@HIST1H4C,p10@HIST1H4F,p9@HIST1H4A,p9@HIST1H4B,p9@HIST1H4D,p9@HIST1H4E,p9@HIST1H4H,p9@HIST1H4I,p9@HIST1H4J,p9@HIST1H4K,p9@HIST1H4L,p9@HIST2H4A,p9@HIST2H4B,p9@HIST4H4	HIST1H4J	ENSG00000197238.4	6.84353	4.46307	5.75671e-05	UP		protein coding	UP	UP
chr1:156391550..156391569,-	p2@C1orf61	C1orf61	ENSG00000125462.16	6.82632	1.64134	1.4341e-06	UP	ON	protein coding	UP	UP	ON	ON
chr19:4769143..4769147,+	p1@MIR7-3HG	MIR7-3HG		6.82509	2.02836	0.00713677	UP		linc	NA	NA	NA	NA
chr7:145813864..145813947,+	p1@CNTNAP2	CNTNAP2		6.82453	1.48855	0.0214187	UP		protein coding	UP	UP	OFF
chr10:101542415..101542428,+	p4@ABCC2	ABCC2	ENSG00000023839.10	6.82359	1.64307	0.00122942	UP	ON	protein coding	UP	UP
chr2:233320855..233320886,+	p1@ALPI	ALPI		6.8154	1.64862	0.0148658	UP		protein coding	UP	UP	ON	ON
chr12:20975516..20975562,+	p@chr12:20975516..20975562,+	SLCO1B3	NA	6.81478	1.64945	0.000140066	UP	ON	protein coding gene body	UP	UP	ON	ON
chr5:73071714..73071730,+	p@chr5:73071714..73071730,+	ARHGEF28	NA	6.81193	1.61242	0.000800865	UP	ON	protein coding gene body	NA	NA	NA	NA
chr18:61368086..61368120,+	p@chr18:61368086..61368120,+	SERPINB11		6.81042	1.66379	0.0221245	UP		other		UP
chr18:55100785..55100819,-	p@chr18:55100785..55100819,-			6.80591	1.47131	0.0305165	UP		lncrna	NA	NA	NA	NA
chr8:114449161..114449175,-	p1@CSMD3	CSMD3	ENSG00000164796.17	6.8036	2.43671	0.00227814	UP		protein coding		UP
chr13:101090921..101090936,+	p@chr13:101090921..101090936,+	PCCA		6.7977	1.63492	0.0221851	UP		protein coding gene body
chr4:88450372..88450424,-	p3@SPARCL1	SPARCL1		6.79388	1.57637	0.0251819	UP		protein coding	DOWN	DOWN
chr3:120627034..120627102,+	p1@STXBP5L	STXBP5L	ENSG00000145087.12	6.79379	1.48695	0.000918806	UP	ON	protein coding	UP	UP	ON	ON
chr1:92634472..92634492,+	p1@KIAA1107	KIAA1107		6.78916	1.45757	0.0308181	UP		protein coding gene body
chr18:63412128..63412151,+	p@chr18:63412128..63412151,+			6.78916	1.45757	0.030818	UP		not annotated	NA	NA	NA	NA
chr2:149017229..149017235,-	p@chr2:149017229..149017235,-			6.78704	2.32541	0.00867571	UP		lncrna	NA	NA	NA	NA
chr5:5146295..5146366,+	p1@ADAMTS16	ADAMTS16	NA	6.78143	1.61644	4.79066e-06	UP	ON	protein coding gene body	UP		ON
chrX:107262093..107262120,+	p@chrX:107262093..107262120,+		NA	6.78065	2.63967	0.00304784	UP		protein coding	NA	NA	NA	NA
chr21:39493435..39493461,-	p1@DSCR4	DSCR4	ENSG00000184029.9	6.77878	1.63263	0.0108829	UP		protein coding	UP	UP	ON	ON
chr17:46703826..46703845,-	p3@HOXB9	HOXB9	ENSG00000170689.9	6.77625	1.50662	0.000315193	UP	ON	protein coding	UP	UP	ON	ON
chr7:107883678..107883689,-	p13@NRCAM	NRCAM		6.77507	1.63787	0.0225767	UP		protein coding		UP
chr2:27070964..27071027,+	p1@DPYSL5	DPYSL5	ENSG00000157851.16	6.7711	1.48129	0.00255824	UP	ON	protein coding	UP	UP	ON	ON
chr17:77743943..77743968,-	p@chr17:77743943..77743968,-		NA	6.75903	1.59891	0.00228172	UP	ON	linc	NA	NA	NA	NA
chr7:139227292..139227325,+	p@chr7:139227292..139227325,+	CLEC2L	NA	6.75424	1.56921	0.0124235	UP		protein coding gene body	UP	UP		ON
chr14:65346617..65346639,-	p1@SPTB	SPTB	ENSG00000070182.17	6.74795	1.56384	0.000836662	UP	ON	protein coding	UP	UP
chr16:28996364..28996381,+	p3@LAT	LAT	ENSG00000213658.10	6.73081	1.61958	0.0041427	UP	ON	protein coding
chr13:24144532..24144589,+	p2@TNFRSF19	TNFRSF19	ENSG00000127863.15	6.73002	1.57974	0.0057717	UP	ON	protein coding
chr5:524558..524565,-	p1@SLC9A3	SLC9A3	ENSG00000066230.10	6.72794	1.60183	0.0127392	UP		protein coding	UP	UP		ON
chr18:40857274..40857292,-	p5@SYT4	SYT4		6.72016	1.40135	0.0320213	UP		protein coding			OFF	OFF
chr18:63412228..63412270,+	p@chr18:63412228..63412270,+			6.72016	1.40135	0.0320213	UP		not annotated	NA	NA	NA	NA
chr5:58571829..58571862,-	p9@PDE4D	PDE4D	ENSG00000113448.16	6.71776	1.58798	0.00246075	UP	ON	protein coding		DOWN
chr2:87754989..87755007,+	p1@LINC00152	LINC00152	ENSG00000222041.10	6.71501	2.74628	0.000168738	UP	ON	linc	NA	NA	NA	NA
chr13:36788658..36788703,-	p2@CCDC169-SOHLH2,p2@SOHLH2	SOHLH2		6.70986	1.59234	0.0233987	UP		protein coding	UP	UP		ON
chrX:150345054..150345060,+	p1@GPR50	GPR50	ENSG00000102195.8	6.70375	1.56153	0.0152425	UP		protein coding	UP	UP	ON	ON
chr14:57960545..57960595,-	p1@C14orf105	C14orf105	ENSG00000100557.9	6.69626	1.57675	0.00907686	UP		protein coding	UP		ON
chr4:103266043..103266060,-	p12@SLC39A8	SLC39A8		6.69375	2.66735	0.0022235	UP		protein coding	DOWN	DOWN
chr13:36429731..36429762,-	p4@DCLK1	DCLK1	ENSG00000133083.14	6.69109	1.53518	0.00120846	UP	ON	protein coding	UP
chr2:201242941..201242960,+	p4@SPATS2L	SPATS2L	ENSG00000196141.12	6.68792	3.49101	6.71817e-06	UP		protein coding
chr3:149051194..149051242,-	p5@TM4SF18	TM4SF18	ENSG00000163762.6	6.68364	1.57224	6.43656e-05	UP	ON	protein coding		DOWN		ON
chr17:9745841..9745870,+	p1@GLP2R	GLP2R	ENSG00000065325.12	6.67069	1.55242	0.00526087	UP	ON	protein coding		DOWN	OFF	OFF
chr5:58652788..58652840,-	p8@PDE4D	PDE4D	ENSG00000113448.16	6.66714	1.55396	0.00740019	UP		protein coding		DOWN
chr12:71551618..71551630,-	p3@TSPAN8	TSPAN8		6.66238	1.3597	0.0200476	UP		protein coding	UP
chr20:58508359..58508420,-	p2@SYCP2	SYCP2	ENSG00000196074.12	6.66193	1.53223	0.00498833	UP	ON	protein coding	UP	UP	ON	ON
chr11:15583363..15583369,+	p@chr11:15583363..15583369,+	RP11-531H8.1		6.6617	1.52786	0.0242469	UP		linc	NA	NA	NA	NA
chr19:6926344..6926391,+	p@chr19:6926344..6926391,+	EMR1	NA	6.65628	1.53756	0.000325901	UP	ON	protein coding gene body	DOWN	DOWN
chr1:240775419..240775435,-	p2@GREM2	GREM2	ENSG00000180875.4	6.65516	1.5341	0.00798199	UP		protein coding		DOWN		OFF
chr4:41540160..41540196,+	p3@LIMCH1	LIMCH1	ENSG00000064042.17	6.65462	1.52833	0.00237242	UP	ON	protein coding	DOWN	DOWN
chr3:191143312..191143322,+	p@chr3:191143312..191143322,+		NA	6.65385	1.52397	0.0130805	UP		linc	NA	NA	NA	NA
chr14:60097297..60097403,-	p1@RTN1	RTN1	ENSG00000139970.16	6.65251	2.6465	0.00801463	UP		protein coding	DOWN	DOWN	ON
chr9:123812542..123812560,-	p1@C5	C5		6.65154	1.54428	0.0243885	UP		protein coding		DOWN
chr8:27115909..27115927,-	p1@STMN4	STMN4		6.64769	1.34302	0.0334306	UP		protein coding	UP	UP		ON
chr22:22900001..22900057,-	p2@PRAME	PRAME	ENSG00000185686.17	6.6475	1.463	0.00209547	UP	ON	protein coding	UP	UP	ON	ON
chr5:84943630..84943645,-	p@chr5:84943630..84943645,-		NA	6.62804	1.50593	0.00711998	UP		linc	NA	NA	NA	NA
chr16:10652993..10653057,-	p5@EMP2	EMP2	ENSG00000213853.9	6.6278	1.45624	0.000179874	UP	ON	protein coding	DOWN	DOWN
chr2:78768976..78769030,-	p1@uc002snv.3		NA	6.62117	2.98974	0.000968185	UP	ON	pseudogene	NA	NA	NA	NA
chr8:15274691..15274710,+	p2@TUSC3	TUSC3	ENSG00000104723.20	6.61041	2.03743	2.46705e-06	UP	ON	protein coding		UP
chr18:40857389..40857405,-	p3@SYT4	SYT4		6.61004	1.31301	0.0341879	UP		protein coding			OFF	OFF
chr2:71162995..71163037,+	p1@ATP6V1B1	ATP6V1B1	ENSG00000116039.11	6.59834	1.95622	0.00144146	UP	ON	protein coding		UP	ON
chr10:4828763..4828786,+	p7@AKR1E2	AKR1E2	ENSG00000165568.17	6.59397	1.5196	0.0136715	UP		protein coding	UP	UP
chr11:69061580..69061585,+	p5@MYEOV	MYEOV	ENSG00000172927.3	6.58637	1.48916	6.70153e-06	UP	ON	protein coding	UP	UP		ON
chr3:63805017..63805035,+	p2@C3orf49	C3orf49		6.58479	1.49318	0.0254806	UP		protein coding		DOWN		OFF
chr17:41620493..41620539,-	p@chr17:41620493..41620539,-	ETV4		6.57882	1.48874	0.0254389	UP		protein coding gene body	UP	UP
chr2:158345462..158345480,-	p4@CYTIP	CYTIP		6.57866	1.48809	0.011255	UP		protein coding		DOWN
chr4:169248228..169248233,+	p@chr4:169248228..169248233,+		NA	6.57423	1.42137	0.000746249	UP	ON	not annotated	NA	NA	NA	NA
chr1:246382992..246383003,-	p@chr1:246382992..246383003,-	SMYD3		6.57138	1.28241	0.034937	UP		protein coding gene body
chr14:93389488..93389501,+	p1@CHGA	CHGA	ENSG00000100604.12	6.56332	3.74382	0.00067254	UP		protein coding	UP	UP
chr5:179757923..179757948,-	p3@GFPT2	GFPT2	ENSG00000131459.12	6.56065	1.45781	0.00315999	UP	ON	protein coding
chr5:79948119..79948125,+	p@chr5:79948119..79948125,+		NA	6.55456	1.40967	0.000577098	UP	ON	not annotated	NA	NA	NA	NA
chr8:123580969..123580991,-	p@chr8:123580969..123580991,-			6.55424	1.42888	0.00694057	UP	ON	linc	NA	NA	NA	NA
chr12:66036137..66036157,-	p1@ENST00000539653,p2@ENST00000544557	RP11-230G5.2	ENSG00000250748.6	6.54881	2.54402	0.0046941	UP	ON	linc	NA	NA	NA	NA
chr11:17555421..17555441,-	p6@USH1C	USH1C	ENSG00000006611.15	6.54752	1.46387	0.00758268	UP		protein coding	UP	UP
chr12:112443767..112443827,-	p3@TMEM116	TMEM116	ENSG00000198270.12	6.54736	1.36247	0.00533739	UP	ON	protein coding
chr2:201243006..201243024,+	p9@SPATS2L	SPATS2L	ENSG00000196141.12	6.54368	1.87021	9.18461e-05	UP	ON	protein coding
chr2:28113973..28113990,-	p1@LOC100302650	RBKS	ENSG00000171174.9	6.53663	1.45789	0.00678304	UP	ON	protein coding
chr2:176972000..176972025,+	p4@HOXD11	HOXD11	ENSG00000128713.12	6.53605	1.29834	0.00961432	UP		protein coding	UP	UP	ON	ON
chr13:100623375..100623425,-	p1@ZIC5	ZIC5	NA	6.53595	1.43403	5.97409e-07	UP	ON	protein coding gene body	UP	UP	ON	ON
chr8:95220775..95220820,-	p1@CDH17	CDH17		6.53478	1.45739	0.0263411	UP		protein coding	UP	UP
chr1:246469346..246469359,-	p7@SMYD3	SMYD3	ENSG00000185420.18	6.53478	1.42383	0.0145553	UP		protein coding
chr8:53162037..53162058,-	p5@ST18	ST18		6.53166	1.25121	0.0357229	UP		protein coding	UP	UP	ON
chr22:48972150..48972153,+	p4@FAM19A5	FAM19A5	ENSG00000219438.8	6.53154	1.45128	0.0214636	UP		protein coding			ON	ON
chr20:51880403..51880404,+	p@chr20:51880403..51880404,+	TSHZ2	NA	6.52834	1.37008	0.0110889	UP		protein coding gene body		UP	ON	ON
chr6:120326861..120326878,+	p@chr6:120326861..120326878,+		NA	6.52138	1.42574	1.5738e-05	UP	ON	not annotated	NA	NA	NA	NA
chr8:16859835..16859861,-	p1@FGF20	FGF20		6.52069	1.40166	0.0264532	UP		protein coding	UP	UP	ON
chr8:24814118..24814133,-	p1@NEFL	NEFL	ENSG00000277586.1	6.52011	4.73536	0.000247301	UP		lncrna	UP	UP	OFF
chr13:100622559..100622611,-	p@chr13:100622559..100622611,-	ZIC5	NA	6.51742	1.42278	4.66898e-07	UP	ON	protein coding gene body	UP	UP	ON	ON
chr22:29876197..29876215,+	p1@NEFH	NEFH	ENSG00000100285.9	6.5118	2.98717	0.0024709	UP		protein coding	UP	UP
chr17:25416565..25416581,+	p@chr17:25416565..25416581,+		NA	6.50861	1.376	0.00180848	UP	ON	linc	NA	NA	NA	NA
chr12:131856235..131856282,-	p@chr12:131856235..131856282,-			6.50519	1.43435	0.0268546	UP		linc	NA	NA	NA	NA
chr12:70944095..70944107,+	p@chr12:70944095..70944107,+			6.50432	1.95203	0.00899932	UP		lncrna	NA	NA	NA	NA
chr6:130088321..130088346,-	p@chr6:130088321..130088346,-		NA	6.50239	1.4372	0.00668565	UP	ON	not annotated	NA	NA	NA	NA
chr12:1920975..1920990,-	p3@CACNA2D4	CACNA2D4	ENSG00000151062.14	6.50185	1.4393	0.00713677	UP		protein coding
chr16:68561738..68561744,+	p@chr16:68561738..68561744,+		NA	6.49686	1.4236	0.000695622	UP	ON	protein coding	NA	NA	NA	NA
chrX:114937108..114937121,+	p1@ENST00000434365	EEF1GP5	ENSG00000234785.1	6.49626	4.72061	3.41824e-06	UP		pseudogene		UP	ON	ON
chrX:16202178..16202185,-	p@chrX:16202178..16202185,-			6.49003	1.44365	0.02701	UP		lncrna	NA	NA	NA	NA
chr14:31343747..31343772,+	p1@COCH	COCH	ENSG00000100473.15	6.48805	1.9622	2.63628e-07	UP	ON	protein coding	UP	UP	ON
chr8:134203303..134203314,+	p2@WISP1	WISP1		6.48308	1.37362	0.0272229	UP		protein coding	UP	UP
chr19:8444480..8444485,+	p@chr19:8444480..8444485,+		NA	6.48281	1.97422	6.54525e-05	UP	ON	not annotated	NA	NA	NA	NA
chr6:49681235..49681273,-	p1@CRISP2	CRISP2		6.47765	1.41874	0.0194289	UP		protein coding		DOWN		OFF
chr17:982198..982256,-	p5@ABR	ABR		6.47756	1.98534	0.026928	UP		protein coding
chr2:241544834..241544861,+	p2@GPR35	GPR35	ENSG00000178623.11	6.46588	2.08193	0.00351736	UP	ON	protein coding	UP
chr1:120904659..120904667,+	p1@ENST00000401004	HIST2H3DP1	ENSG00000213244.3	6.46459	3.00023	0.000359416	UP		pseudogene			ON
chr16:2094808..2094822,-	p@chr16:2094808..2094822,-	NTHL1	ENSG00000065057.7	6.46275	1.28251	0.00697125	UP	ON	protein coding
chr1:145683530..145683562,+	p@chr1:145683530..145683562,+	RNF115		6.46201	2.42667	0.0216203	UP		protein coding gene body
chr12:66036219..66036262,-	p1@ENST00000544557	RP11-230G5.2	ENSG00000250748.6	6.45958	3.65141	0.00395708	UP		linc	NA	NA	NA	NA
chr7:81319816..81319864,+	p@chr7:81319816..81319864,+		NA	6.45532	1.39352	0.00246534	UP	ON	lncrna	NA	NA	NA	NA
chr11:1244288..1244302,+	p1@MUC5B	MUC5B	ENSG00000117983.17	6.44621	2.92891	0.00777351	UP		protein coding	UP
chr1:173020072..173020086,-	p1@TNFSF18	TNFSF18	ENSG00000120337.8	6.44431	2.6956	0.000357479	UP		protein coding		UP
chr4:147866960..147866991,-	p2@TTC29	TTC29		6.44408	1.34551	0.0147583	UP		protein coding	DOWN	DOWN	OFF	OFF
chr2:29353477..29353508,+	p11@CLIP4	CLIP4	ENSG00000115295.19	6.44363	1.36158	7.36001e-05	UP	ON	protein coding
chr1:79086118..79086182,+	p1@IFI44L	IFI44L	ENSG00000137959.15	6.44243	4.20773	1.65251e-05	UP		protein coding
chr9:137764479..137764484,-	p1@uc004cff.2		NA	6.44154	1.36062	0.0114299	UP		lncrna	NA	NA	NA	NA
chr12:20975472..20975489,+	p@chr12:20975472..20975489,+	SLCO1B3	NA	6.43878	1.36954	0.000105365	UP	ON	protein coding gene body	UP	UP	ON	ON
chr21:38593701..38593756,+	p1@ENST00000440629	AP001432.14	ENSG00000242553.1	6.4289	1.35367	2.02866e-10	UP	ON	linc			ON	ON
chr2:73520667..73520683,-	p1@EGR4	EGR4	ENSG00000135625.7	6.41783	1.3698	1.86558e-05	UP	ON	protein coding	UP	UP
chr14:77608121..77608141,-	p1@ZDHHC22	ZDHHC22	ENSG00000177108.5	6.41678	1.31887	0.0104813	UP	ON	protein coding	UP	UP
chr16:65159769..65159787,-	p@chr16:65159769..65159787,-	CDH11	ENSG00000140937.13	6.41357	2.15187	0.00405319	UP		protein coding
chr14:65803162..65803174,+	p@chr14:65803162..65803174,+		NA	6.41295	1.38683	0.016713	UP		linc	NA	NA	NA	NA
chr2:174982800..174982819,-	p@chr2:174982800..174982819,-	OLA1	NA	6.41044	2.32889	0.000327091	UP	ON	protein coding gene body	UP	UP
chr11:117695415..117695426,-	p3@FXYD2	FXYD2		6.40774	1.36461	0.0286013	UP		protein coding	UP	UP	OFF	OFF
chr2:204400013..204400047,-	p1@RAPH1	RAPH1	ENSG00000173166.17	6.40483	5.64147	1.81819e-05	UP		protein coding
chr7:55799735..55799767,+	p1@SUMO2P3	SUMO2P3	ENSG00000224971.1	6.39338	2.29831	0.000105488	UP	ON	pseudogene
chr1:222721396..222721432,-	p2@HHIPL2	HHIPL2	ENSG00000143512.12	6.38894	1.33879	6.03676e-05	UP	ON	protein coding	UP	UP	ON	ON
chr5:95768762..95768786,-	p4@PCSK1	PCSK1		6.38335	1.13687	0.0393744	UP		protein coding	UP	UP	ON	ON
chr11:5526872..5526884,-	p1@OR51B5,p2@HBE1	HBG2	ENSG00000167355.7	6.38258	1.32333	0.000578974	UP	ON	protein coding	DOWN	DOWN	OFF	OFF
chr8:81786662..81786712,-	p@chr8:81786662..81786712,-	ZNF704	ENSG00000164684.13	6.37769	2.64629	0.000174675	UP	ON	protein coding
chrX:134975858..134975877,+	p1@SAGE1	SAGE1	NA	6.37689	1.32092	0.0039072	UP	ON	protein coding	UP	UP	ON	ON
chr5:163723950..163723997,+	p1@ENST00000519570,p1@ENST00000522686,p1@ENST00000523704,p1@ENST00000524297	CTC-340A15.2		6.37347	1.3386	0.0292408	UP		antisense	NA	NA	NA	NA
chr19:51857495..51857576,-	p@chr19:51857495..51857576,-	CTD-2616J11.11	NA	6.37319	4.0434	0.000746972	UP		protein coding gene body	NA	NA	NA	NA
chr21:47562618..47562624,-	p2@FTCD	FTCD	ENSG00000160282.13	6.36795	1.34746	0.0150165	UP		protein coding	UP	UP	ON	ON
chr17:70713965..70713974,-	p@chr17:70713965..70713974,-	SLC39A11	NA	6.36498	1.30417	0.00643771	UP	ON	protein coding gene body	UP	UP
chr4:116434644..116434654,+	p@chr4:116434644..116434654,+			6.36089	1.11984	0.0400903	UP		pseudogene	NA	NA	NA	NA
chr12:117099342..117099357,+	p1@ENST00000546835	RP11-497G19.1	ENSG00000257883.1	6.35745	1.33813	0.00949039	UP		linc	UP		ON	ON
chr2:154449479..154449511,-	p2@ENST00000424322	AC012501.2	ENSG00000227400.2	6.35458	1.28564	0.000438994	UP	ON	lncrna		UP	ON	ON
chr4:41540314..41540341,+	p6@LIMCH1	LIMCH1	ENSG00000064042.17	6.34372	1.32481	0.00244012	UP	ON	protein coding	DOWN	DOWN
chr4:81118647..81118666,+	p1@PRDM8	PRDM8	ENSG00000152784.15	6.34275	2.46011	0.00625402	UP		protein coding
chr2:79740118..79740210,+	p1@CTNNA2	CTNNA2		6.34161	1.11589	0.0175694	UP		protein coding	UP	UP
chr17:16593539..16593579,+	p1@CCDC144A	CCDC144A	ENSG00000170160.16	6.33609	1.92807	0.000310396	UP	ON	protein coding				OFF
chr5:175298541..175298564,+	p6@CPLX2	CPLX2	ENSG00000145920.14	6.33443	1.25772	0.0119109	UP		protein coding	UP	UP	OFF	OFF
chr2:233385210..233385225,+	p5@PRSS56	PRSS56		6.33163	1.28695	0.030107	UP		protein coding	NA	NA	NA	NA
chrX:118343594..118343601,-	p@chrX:118343594..118343601,-		NA	6.32612	1.82283	0.000566866	UP	ON	not annotated	NA	NA	NA	NA
chr1:246887780..246887791,+	p6@SCCPDH	SCCPDH		6.3254	1.3022	0.00509442	UP	ON	protein coding
chr6:66969216..66969240,+	p@chr6:66969216..66969240,+		NA	6.31845	1.72223	0.00794743	UP		linc	NA	NA	NA	NA
chr7:82073082..82073100,-	p2@CACNA2D1	CACNA2D1	ENSG00000153956.15	6.31796	2.4333	0.000116202	UP	ON	protein coding		UP
chr6:138060034..138060045,-	p1@ENST00000411615,p1@ENST00000419220	RP11-356I2.1		6.31721	1.29834	0.0303238	UP		linc	NA	NA	NA	NA
chr7:99578374..99578386,+	p1@AZGP1P1	AZGP1P1		6.31518	1.31921	0.0303238	UP		pseudogene	NA	NA	NA	NA
chr19:51017895..51017953,-	p1@ASPDH	ASPDH		6.31488	1.08524	0.0416414	UP		protein coding
chr11:122027810..122027839,-	p@chr11:122027810..122027839,-	RP11-820L6.1	NA	6.31455	2.31443	0.000196725	UP	ON	lncrna	NA	NA	NA	NA
chrX:110339439..110339450,+	p3@PAK3	PAK3	ENSG00000077264.14	6.31393	1.29394	0.00323334	UP	ON	protein coding	UP		OFF	OFF
chr8:128280926..128280930,-	p@chr8:128280926..128280930,-			6.31205	1.30718	0.030624	UP		not annotated	NA	NA	NA	NA
chr11:129684577..129684583,-	p@chr11:129684577..129684583,-		NA	6.31176	1.7128	0.00160096	UP	ON	lncrna	NA	NA	NA	NA
chr1:98519916..98519967,+	p@chr1:98519916..98519967,+		NA	6.30512	1.87449	3.02466e-05	UP	ON	linc	NA	NA	NA	NA
chr1:159859973..159859983,+	p@chr1:159859973..159859983,+			6.303	1.29386	0.0224852	UP		lncrna	NA	NA	NA	NA
chr9:18474163..18474202,+	p2@ADAMTSL1	ADAMTSL1	ENSG00000178031.15	6.3013	2.66995	0.00248104	UP		protein coding			ON
chr5:33794904..33794916,-	p@chr5:33794904..33794916,-	ADAMTS12	NA	6.29893	1.29098	0.0130589	UP		protein coding gene body	UP	UP	ON
chr17:66176843..66176848,+	p@chr17:66176843..66176848,+		NA	6.29246	1.25666	0.00467657	UP	ON	other	NA	NA	NA	NA
chr15:51973877..51973934,+	p2@SCG3	SCG3		6.29132	1.06765	0.0424616	UP		protein coding	UP	UP	OFF	OFF
chr1:179712410..179712437,+	p1@FAM163A	FAM163A		6.29103	1.60859	0.0118991	UP		protein coding	UP	UP	ON	ON
chr18:56246785..56246806,-	p1@ALPK2	ALPK2	ENSG00000198796.6	6.28973	1.23716	0.00107321	UP	ON	protein coding	UP	UP	ON
chr8:18942296..18942344,-	p6@PSD3	PSD3		6.28744	1.27618	0.00966428	UP	ON	protein coding		UP
chrX:23855458..23855463,-	p1@RPL9P7	RPL9P7	ENSG00000238103.4	6.28346	2.57194	7.02706e-05	UP	ON	pseudogene
chr1:243433014..243433053,+	p@chr1:243433014..243433053,+	SDCCAG8	NA	6.28254	1.28936	0.00975525	UP		protein coding gene body
chr19:51472081..51472088,-	p8@KLK6	KLK6	ENSG00000167755.13	6.27696	1.18768	0.00340127	UP	ON	protein coding	UP	UP	ON	ON
chr18:61370192..61370197,+	p1@SERPINB11	SERPINB11		6.27447	3.06736	0.0075994	UP		other		UP
chr11:124041748..124041781,+	p@chr11:124041748..124041781,+		NA	6.27304	1.26516	0.0162366	UP		other	NA	NA	NA	NA
chr7:4833949..4833955,+	p@chr7:4833949..4833955,+		NA	6.27245	1.25709	0.0102188	UP		not annotated	NA	NA	NA	NA
chr20:62130603..62130627,-	p3@EEF1A2	EEF1A2	ENSG00000101210.10	6.27046	3.08775	6.77293e-10	UP		protein coding	UP	UP
chr21:11098943..11098986,-	p1@BAGE2	BAGE2	ENSG00000187172.15	6.27035	1.24882	0.01605	UP		pseudogene	UP	UP
chr12:76334611..76334639,+	p@chr12:76334611..76334639,+		NA	6.26885	1.79064	0.00243799	UP	ON	not annotated	NA	NA	NA	NA
chr4:103266068..103266091,-	p10@SLC39A8	SLC39A8	ENSG00000138821.12	6.26507	3.06859	0.00579351	UP		protein coding	DOWN	DOWN
chrX:107262068..107262079,+	p@chrX:107262068..107262079,+		NA	6.26502	1.28197	0.00953065	UP	ON	protein coding	NA	NA	NA	NA
chr2:230579185..230579302,-	p1@DNER	DNER	ENSG00000187957.7	6.26291	3.89642	2.85044e-05	UP		protein coding	UP
chr5:33794876..33794902,-	p@chr5:33794876..33794902,-	ADAMTS12	NA	6.2615	1.87124	0.0085005	UP		protein coding gene body	UP	UP	ON
chr15:59903975..59903992,+	p1@GCNT3	GCNT3		6.25512	1.72511	0.00739956	UP		protein coding	UP	UP	ON
chr7:107883809..107883820,-	p11@NRCAM	NRCAM		6.25433	1.25477	0.021746	UP		protein coding		UP
chr1:188874798..188874820,+	p1@ENST00000445072	LINC01035		6.25119	1.25158	0.0318395	UP		linc	NA	NA	NA	NA
chr4:103265976..103265993,-	p11@SLC39A8	SLC39A8	ENSG00000138821.12	6.24435	2.23379	0.0025569	UP		protein coding	DOWN	DOWN
chrX:29678163..29678175,-	p@chrX:29678163..29678175,-		NA	6.24397	1.27054	0.00401191	UP	ON	lncrna	NA	NA	NA	NA
chr4:88901208..88901247,+	p2@SPP1	SPP1	NA	6.2403	1.20958	0.00102749	UP	ON	protein coding gene body	UP	UP
chr3:72387462..72387488,-	p@chr3:72387462..72387488,-			6.2361	1.24097	0.0320823	UP		not annotated	NA	NA	NA	NA
chr4:116034979..116035046,-	p1@NDST4	NDST4		6.23289	1.86959	0.0310128	UP		protein coding	UP	UP
chr6:10482197..10482203,-	p@chr6:10482197..10482203,-		NA	6.22367	2.41402	0.000359772	UP	ON	other	NA	NA	NA	NA
chr8:143763362..143763394,-	p2@JRK	JRK	ENSG00000234616.8	6.22364	1.78482	3.8653e-05	UP	ON	lncrna
chr2:190089901..190089924,-	p@chr2:190089901..190089924,-			6.22122	1.23014	0.0209206	UP		not annotated	NA	NA	NA	NA
chr1:149605910..149605911,+	p1@ENST00000365626	RP11-353N4.6	ENSG00000202496.1	6.21933	1.15922	0.00763223	UP	ON	pseudogene	NA	NA	NA	NA
chr11:57228029..57228040,+	p2@RTN4RL2	RTN4RL2		6.21707	1.22647	0.00696398	UP	ON	protein coding	UP
chr16:65159938..65159954,-	p@chr16:65159938..65159954,-	CDH11		6.21471	1.22472	0.012389	UP		protein coding
chr1:149822620..149822635,+	p1@HIST2H2AA3,p1@HIST2H2AA4	HIST2H2AA4	ENSG00000272196.2	6.21203	5.26182	2.59136e-05	UP		protein coding
chr17:18625426..18625454,+	p2@TRIM16L	TRIM16L	ENSG00000108448.20	6.20279	1.70735	0.00283862	UP	ON	protein coding	UP	UP
chr5:138718973..138719006,-	p1@SLC23A1	SLC23A1		6.20105	1.21779	0.0329795	UP		protein coding		DOWN		OFF
chr17:19912640..19912695,+	p2@SPECC1	SPECC1	ENSG00000128487.16	6.1955	2.06736	1.16763e-05	UP	ON	protein coding	NA	NA	NA	NA
chr3:54660217..54660228,+	p1@RPS15P5	RPS15P5	ENSG00000229806.1	6.19521	3.63004	5.44057e-05	UP		pseudogene			ON	ON
chr7:102613693..102613717,-	p2@FBXL13	FBXL13	ENSG00000161040.16	6.19419	1.21275	9.19237e-05	UP	ON	protein coding				OFF
chr13:19692402..19692418,-	p1@PHF2P1		NA	6.18738	1.20482	0.0113719	UP		pseudogene	NA	NA	NA	NA
chr7:57639397..57639403,-	p@chr7:57639397..57639403,-		NA	6.17439	1.19673	0.0103602	UP		linc	NA	NA	NA	NA
chr20:56100179..56100208,-	p1@CTCFL	CTCFL		6.174	1.11205	0.0265087	UP		protein coding	UP	UP
chr5:140561944..140561991,+	p1@PCDHB16	PCDHB16	ENSG00000272674.3	6.17195	1.6248	0.000141342	UP	ON	protein coding				ON
chr14:45381821..45381837,-	p@chr14:45381821..45381837,-		NA	6.17187	1.58433	0.00533254	UP		lncrna	NA	NA	NA	NA
chr5:140729649..140729713,+	p1@PCDHGB1	PCDHGB1	ENSG00000254221.2	6.17061	2.82001	5.21983e-09	UP		protein coding		UP
chr10:4822880..4822903,-	p@chr10:4822880..4822903,-		NA	6.16864	1.22008	0.0175032	UP		linc	NA	NA	NA	NA
chr18:40857413..40857422,-	p10@SYT4	SYT4		6.16737	0.976731	0.0471386	UP		protein coding			OFF	OFF
chr11:5949873..5949877,+	p@chr11:5949873..5949877,+			6.16362	1.16467	0.0339149	UP		linc	NA	NA	NA	NA
chr16:67918770..67918820,+	p1@NRN1L	NRN1L	ENSG00000188038.7	6.16113	1.0825	0.00177395	UP	ON	protein coding		DOWN	OFF	OFF
chr17:46692624..46692659,-	p3@HOXB8	HOXB8	ENSG00000120068.6	6.15823	1.06585	0.00507613	UP	ON	protein coding	UP	UP
chr5:119697859..119697884,+	p@chr5:119697859..119697884,+		NA	6.15731	1.16725	0.0146078	UP		linc	NA	NA	NA	NA
chr1:31944306..31944336,-	p@chr1:31944306..31944336,-		NA	6.15608	1.20759	0.00503526	UP	ON	linc	NA	NA	NA	NA
chr13:107029290..107029313,+	p3@LINC00460	LINC00460		6.1521	1.18815	0.0224852	UP		linc	NA	NA	NA	NA
chr1:169555709..169555730,-	p1@F5	F5	ENSG00000198734.10	6.14865	1.93171	0.0023706	UP		protein coding	UP
chr7:145482072..145482103,+	p@chr7:145482072..145482103,+			6.14662	1.1847	0.0341275	UP		not annotated	NA	NA	NA	NA
chr1:222721434..222721452,-	p1@HHIPL2	HHIPL2	ENSG00000143512.12	6.14278	1.16402	0.000168294	UP	ON	protein coding	UP	UP	ON	ON
chr10:5406935..5406962,+	p1@UCN3	UCN3		6.14125	0.957922	0.0481765	UP		protein coding	UP	DOWN	OFF	OFF
chr8:127751345..127751347,+	p@chr8:127751345..127751347,+			6.13347	1.17973	0.00526506	UP	ON	not annotated	NA	NA	NA	NA
chr5:179757790..179757847,-	p2@GFPT2	GFPT2	ENSG00000131459.12	6.13299	2.18657	0.000367036	UP	ON	protein coding
chr11:57227981..57228020,+	p1@RTN4RL2	RTN4RL2	ENSG00000186907.7	6.13008	4.02392	5.57836e-06	UP		protein coding	UP
chr12:47628787..47628808,+	p10@FAM113B	PCED1B	NA	6.12855	1.14101	0.0119896	UP		protein coding	NA	NA	NA	NA
chr5:175298632..175298647,+	p3@CPLX2	CPLX2	ENSG00000145920.14	6.12661	1.06218	0.010879	UP	ON	protein coding	UP	UP	OFF	OFF
chr21:45937497..45937535,+	p1@C21orf90	C21orf90	ENSG00000182912.6	6.12553	1.13078	0.0011746	UP	ON	protein coding		UP	OFF	OFF
chr14:106938365..106938391,-	p@chr14:106938365..106938391,-		NA	6.12363	1.10401	0.00676306	UP	ON	protein coding	NA	NA	NA	NA
chr18:13113125..13113128,+	p@chr18:13113125..13113128,+	CEP192	NA	6.12299	1.088	0.00711998	UP	ON	protein coding gene body
chr7:32083456..32083492,-	p@chr7:32083456..32083492,-	PDE1C	NA	6.12239	1.15907	0.00424795	UP	ON	protein coding gene body	DOWN	DOWN		OFF
chr2:70995350..70995375,-	p2@ADD2	ADD2	ENSG00000075340.22	6.11608	1.69601	4.56629e-05	UP	ON	protein coding		UP
chr10:26964681..26964713,-	p@chr10:26964681..26964713,-	RP13-16H11.2	ENSG00000227932.1	6.11551	1.14705	0.00298336	UP	ON	linc	UP	UP		ON
chr15:51973708..51973725,+	p3@SCG3	SCG3		6.11464	0.938894	0.049217	UP		protein coding	UP	UP	OFF	OFF
chr12:8786931..8786949,+	p1@ENST00000540341	RP11-438L7.3	ENSG00000255967.1	6.11458	1.11313	0.000547446	UP	ON	pseudogene
chrM:6276..6287,+	p12@uc011mfh.1	MT-CO1	ENSG00000198804.2	6.11224	1.09349	0.00194186	UP	ON	protein coding
chr3:195076933..195076946,-	p10@ACAP2	ACAP2		6.11136	1.16741	0.035168	UP		protein coding		UP
chr10:1779648..1779662,-	p6@ADARB2	ADARB2	ENSG00000185736.15	6.11121	1.50314	0.0024885	UP	ON	protein coding			OFF	OFF
chr17:20771531..20771548,-	p1@CCDC144NL	CCDC144NL	ENSG00000205212.3	6.10992	1.13135	0.00438661	UP	ON	protein coding	UP	UP
chr1:114654778..114654823,+	p@chr1:114654778..114654823,+			6.10254	1.14887	0.0223861	UP		lncrna	NA	NA	NA	NA
chr10:25755140..25755175,+	p3@GPR158	GPR158	ENSG00000151025.9	6.0979	1.14217	0.000337123	UP	ON	protein coding	UP	UP	OFF
chr7:87563557..87563641,+	p1@ADAM22	ADAM22	ENSG00000008277.14	6.09632	2.59378	1.27749e-10	UP		protein coding	UP			OFF
chr11:86380564..86380569,-	p@chr11:86380564..86380569,-	ME3	NA	6.0927	1.1439	0.00294761	UP	ON	protein coding gene body
chr12:104674604..104674628,-	p1@ENST00000549807	RP11-818F20.5	ENSG00000257732.1	6.09043	1.12007	8.20348e-06	UP	ON	antisense	UP	UP	ON	ON
chr3:14088646..14088660,-	p@chr3:14088646..14088660,-		NA	6.08717	1.62294	0.00991892	UP		lncrna	NA	NA	NA	NA
chr20:44421093..44421108,+	p4@DNTTIP1	DNTTIP1	ENSG00000101457.12	6.08251	1.86538	0.00015328	UP	ON	protein coding	UP
chr5:115368162..115368176,+	p@chr5:115368162..115368176,+	CTD-2287O16.3	ENSG00000268223.3	6.08103	1.13711	0.00356096	UP	ON	protein coding gene body	NA	NA	NA	NA
chr5:178259821..178259898,-	p@chr5:178259821..178259898,-		NA	6.0805	1.11885	0.00611837	UP	ON	not annotated	NA	NA	NA	NA
chr19:8408021..8408026,+	p@chr19:8408021..8408026,+		NA	6.08048	1.04565	0.0108258	UP	ON	not annotated	NA	NA	NA	NA
chr19:43269809..43269838,-	p1@PSG8	PSG8		6.07714	1.10849	0.0241835	UP		protein coding	UP	UP	ON	ON
chr10:35484090..35484104,+	p6@CREM	CREM	ENSG00000095794.19	6.07574	1.12331	0.00160412	UP	ON	protein coding
chrX:142722844..142722891,-	p2@SLITRK4	SLITRK4	ENSG00000179542.15	6.07369	1.11552	0.00219485	UP	ON	protein coding		UP	OFF	OFF
chr8:104152922..104152992,+	p1@BAALC	BAALC	ENSG00000164929.16	6.07318	3.96745	0.0146362	UP	OFF	protein coding				ON
chr4:66536169..66536189,-	p1@EPHA5	EPHA5	ENSG00000145242.13	6.07157	2.01454	0.00152711	UP		protein coding	UP			OFF
chr19:6591068..6591101,-	p2@CD70	CD70	ENSG00000125726.10	6.0703	1.11109	0.00108276	UP	ON	protein coding	UP	UP
chr19:42656683..42656689,+	p1@ENST00000559786,p1@uc002ost.1	CTC-378H22.2		6.06718	0.909669	0.0340838	UP		antisense	NA	NA	NA	NA
chrX:151307020..151307055,-	p1@MAGEA10	RP11-1007I13.4		6.06714	1.47796	0.0179484	UP		lncrna	NA	NA	NA	NA
chr7:16921601..16921614,-	p1@AGR3	AGR3	ENSG00000173467.8	6.06588	1.09108	0.0108086	UP	ON	protein coding		DOWN		OFF
chr12:114211474..114211499,-	p1@ENST00000547963,p1@ENST00000550905,p1@uc001tvk.1,p1@uc001tvl.3	RP11-438N16.1	ENSG00000249550.6	6.05969	1.085	5.43486e-05	UP	ON	linc	NA	NA	NA	NA
chr17:46682321..46682362,-	p1@HOXB6	HOXB3	ENSG00000108511.9	6.05849	3.56453	8.55885e-06	UP		protein coding	UP	UP
chr9:138453595..138453608,+	p1@PAEP	PAEP	ENSG00000122133.16	6.05707	1.59561	0.00146543	UP	ON	protein coding	UP	UP	ON	ON
chr3:157823609..157823667,+	p3@RSRC1	RSRC1	ENSG00000174891.12	6.05278	1.09627	1.09767e-05	UP	ON	protein coding		UP
chr14:74034310..74034345,+	p4@ACOT2	ACOT2		6.04891	1.08589	0.0217482	UP		protein coding
chr14:80677613..80677701,-	p2@DIO2	DIO2	ENSG00000211448.11	6.04885	1.07287	0.0125276	UP	ON	protein coding	UP	UP
chr4:46911255..46911270,-	p1@COX7B2	COX7B2	ENSG00000170516.16	6.0443	1.05652	0.0132343	UP	ON	protein coding	UP	UP	ON	ON
chr6:64152250..64152255,-	p@chr6:64152250..64152255,-		NA	6.04319	2.04822	0.000349804	UP		linc	NA	NA	NA	NA
chr7:95115246..95115262,+	p1@ASB4	ASB4		6.04066	1.05748	0.0378046	UP		protein coding	UP		OFF	OFF
chr11:9797175..9797232,+	p1@ENST00000525636	SBF2-AS1	ENSG00000246273.6	6.03982	1.03868	0.0228875	UP		antisense	NA	NA	NA	NA
chr6:135679339..135679355,-	p@chr6:135679339..135679355,-	AHI1	NA	6.02653	1.05655	0.0213543	UP		protein coding gene body
chr20:62130629..62130646,-	p4@EEF1A2	EEF1A2	ENSG00000101210.10	6.02553	1.06866	3.10424e-07	UP	ON	protein coding	UP	UP
chr1:147400526..147400541,+	p1@GPR89A,p1@GPR89B	GPR89B	ENSG00000188092.14	6.02475	1.03766	0.00333577	UP	ON	protein coding			ON
chrX:152486108..152486123,-	p1@MAGEA1	MAGEA1		6.024	1.09491	0.0378046	UP		protein coding	UP	UP	ON	ON
chr14:25501778..25501809,-	p@chr14:25501778..25501809,-	STXBP6	NA	6.01774	1.48751	5.62347e-06	UP	ON	protein coding gene body	DOWN	DOWN
chr4:95575427..95575440,+	p@chr4:95575427..95575440,+	PDLIM5		6.01378	1.089	0.0268546	UP		protein coding gene body
chr10:5326456..5326474,-	p@chr10:5326456..5326474,-	AKR1C7P	NA	6.00939	0.909825	0.00418029	UP	ON	pseudogene	NA	NA	NA	NA
chr3:115342470..115342534,+	p2@GAP43	GAP43	ENSG00000172020.12	6.00479	0.904619	0.0147102	UP	ON	protein coding	UP	UP		ON
chr17:76480973..76481009,+	p@chr17:76480973..76481009,+	RP11-559N14.5	ENSG00000267432.5	6.00466	1.07955	0.0260277	UP		antisense	NA	NA	NA	NA
chr4:103266004..103266021,-	p8@SLC39A8	SLC39A8	ENSG00000138821.12	6.00373	1.83123	0.00494315	UP		protein coding	DOWN	DOWN
chr6:124125310..124125362,+	p1@NKAIN2	NKAIN2	ENSG00000188580.13	5.99972	0.888138	0.0148676	UP	ON	protein coding	UP	UP	OFF
chr8:17752996..17753048,-	p1@FGL1	FGL1	ENSG00000104760.16	5.99755	1.70859	0.0106219	UP	ON	protein coding	UP	UP
chr7:145813717..145813743,+	p5@CNTNAP2	CNTNAP2		5.99182	0.860315	0.0290554	UP		protein coding	UP	UP	OFF
chr10:42970747..42970790,-	p1@CCNYL2		NA	5.98968	1.08556	0.00294327	UP	ON	pseudogene	NA	NA	NA	NA
chr7:53879623..53879635,-	p1@FLJ45974	GS1-179L18.1	ENSG00000205628.2	5.98813	1.82122	0.00212581	UP		linc	UP	UP	ON	ON
chr6:153071925..153071939,+	p1@VIP	VIP		5.98793	1.02158	0.0398527	UP		protein coding	DOWN	DOWN	OFF	OFF
chr12:40013582..40013635,-	p1@ABCD2	ABCD2		5.98771	1.07594	0.015607	UP	ON	protein coding
chr4:176733377..176733424,-	p1@GPM6A	GPM6A		5.98624	1.20718	0.0250542	UP		protein coding	DOWN	DOWN	OFF	OFF
chr1:63788098..63788150,-	p1@ENST00000418244,p1@ENST00000449386	RP4-792G4.2	ENSG00000230798.5	5.98161	1.04672	1.80468e-06	UP	ON	antisense	NA	NA	NA	NA
chr5:75919155..75919191,-	p3@F2RL2	F2RL2	ENSG00000164220.6	5.98108	1.92936	0.000850387	UP	ON	protein coding	UP	UP
chr4:100356551..100356570,-	p2@ADH7	ADH7	ENSG00000196344.11	5.98035	1.52649	0.0191968	UP		protein coding		UP
chr9:96698887..96698909,+	p@chr9:96698887..96698909,+			5.97937	1.06493	0.0393005	UP		not annotated	NA	NA	NA	NA
chr22:48027489..48027535,+	p1@uc003bij.2,p1@uc003bik.1	RP11-191L9.4	ENSG00000224271.5	5.97798	1.0244	0.000464729	UP	ON	linc	NA	NA	NA	NA
chr22:21138343..21138378,+	p@chr22:21138343..21138378,+	SERPIND1		5.97028	1.05885	0.0398145	UP		protein coding gene body		DOWN	OFF	OFF
chr10:35484053..35484076,+	p1@CREM	CREM	ENSG00000095794.19	5.96739	3.61663	0.00012448	UP		protein coding
chr2:36806173..36806191,-	p14@FEZ2	FEZ2	ENSG00000171055.14	5.95824	1.07282	0.00744077	UP	ON	protein coding
chr11:131240498..131240532,+	p1@NTM	NTM	ENSG00000182667.14	5.95774	0.984979	0.0245319	UP		protein coding	DOWN	DOWN
chr2:149863676..149863719,+	p@chr2:149863676..149863719,+	KIF5C		5.95451	1.0251	0.040638	UP		protein coding gene body	UP	UP
chr10:4822908..4822927,-	p@chr10:4822908..4822927,-		NA	5.95314	1.07418	0.0212816	UP		linc	NA	NA	NA	NA
chr4:84457250..84457268,+	p2@AGPAT9	AGPAT9	ENSG00000138678.10	5.95212	3.02302	2.07842e-08	UP	ON	protein coding
chr7:23312902..23312968,+	p2@GPNMB	GPNMB	ENSG00000136235.15	5.95042	1.41035	5.9625e-07	UP	ON	protein coding		UP
chr7:43288717..43288757,+	p3@HECW1	HECW1	ENSG00000002746.14	5.95025	1.03172	2.05382e-05	UP	ON	protein coding	UP	UP	ON
chr7:100171489..100171539,-	p1@uc003uvh.2	SAP25	ENSG00000205307.11	5.94607	0.993762	0.0155281	UP		protein coding	NA	NA	NA	NA
chr1:38218882..38218927,-	p1@EPHA10	EPHA10	ENSG00000183317.16	5.94463	1.59155	3.56828e-08	UP	ON	protein coding	UP			OFF
chr11:121896641..121896653,-	p@chr11:121896641..121896653,-			5.94365	1.0474	0.0402435	UP		linc	NA	NA	NA	NA
chr3:127006887..127006889,-	p@chr3:127006887..127006889,-		NA	5.93657	1.0441	0.00571872	UP	ON	linc	NA	NA	NA	NA
chr7:93690435..93690467,+	p3@ENST00000438538	AC003092.1	ENSG00000236453.5	5.93165	1.03626	0.0093267	UP	ON	linc	NA	NA	NA	NA
chr19:10688000..10688029,-	p@chr19:10688000..10688029,-	AP1M2	ENSG00000129354.11	5.93051	1.65969	0.00255937	UP	ON	protein coding			ON
chr19:51412626..51412645,-	p1@KLK4	KLK4	ENSG00000167749.11	5.93033	1.43231	0.023856	UP		protein coding	UP	UP
chr16:28722774..28722807,+	p1@EIF3CL,p1@EIF3C	EIF3C	ENSG00000184110.14	5.92904	2.9135	0.000147253	UP		protein coding	UP	UP
chr19:40675597..40675603,-	p@chr19:40675597..40675603,-		NA	5.92736	1.00091	0.00355394	UP	ON	linc	NA	NA	NA	NA
chr5:175299743..175299779,+	p11@CPLX2	CPLX2	ENSG00000145920.14	5.92638	0.938337	0.0173742	UP		protein coding	UP	UP	OFF	OFF
chr22:27053545..27053561,+	p1@MIAT	MIAT	ENSG00000225783.6	5.92299	1.60421	0.0333622	UP		linc	UP	UP
chr18:70535177..70535254,-	p1@NETO1	NETO1	ENSG00000166342.18	5.92143	2.18705	0.00292352	UP		protein coding	UP	UP	ON	ON
chr5:173472744..173472756,+	p2@HMP19	NSG2		5.92122	1.15784	0.0262401	UP		protein coding	NA	NA	NA	NA
chr7:102613930..102613944,+	p2@ENST00000420058	NFE4	ENSG00000230257.1	5.9192	1.0318	0.00343363	UP	ON	antisense	UP	UP	ON	ON
chrX:2882296..2882356,-	p1@ARSE	ARSE		5.91543	1.89099	0.0122494	UP		protein coding	UP
chr5:132948216..132948237,-	p2@FSTL4	FSTL4	ENSG00000053108.16	5.90104	0.981236	0.00222601	UP	ON	protein coding	UP	UP
chr6:145244699..145244732,+	p@chr6:145244699..145244732,+		NA	5.89596	0.958425	0.01545	UP	ON	not annotated	NA	NA	NA	NA
chrX:106171296..106171331,+	p1@CLDN2	CLDN2		5.89481	1.01028	0.042643	UP		protein coding	UP	DOWN
chr7:107883785..107883799,-	p12@NRCAM	NRCAM		5.89481	1.01028	0.042643	UP		protein coding		UP
chr7:18535346..18535399,+	p1@HDAC9	HDAC9	ENSG00000048052.21	5.89381	1.02708	0.0317023	UP		protein coding
chr11:45307817..45307898,-	p1@SYT13	SYT13	ENSG00000019505.7	5.89219	2.17209	0.0156774	UP		protein coding	UP	UP
chr7:63895150..63895155,+	p@chr7:63895150..63895155,+		NA	5.88974	0.945481	0.00235019	UP	ON	not annotated	NA	NA	NA	NA
chr17:63556446..63556459,-	p3@AXIN2	AXIN2		5.88971	0.956019	0.0218393	UP		protein coding		DOWN
chr11:31832610..31832639,-	p5@PAX6	PAX6	ENSG00000007372.20	5.88722	0.955819	0.000246565	UP	ON	protein coding	DOWN	UP
chr15:27018175..27018241,-	p1@GABRB3	GABRB3	ENSG00000166206.13	5.88532	1.4554	0.00202554	UP	ON	protein coding				OFF
chr7:157129738..157129760,+	p2@DNAJB6	DNAJB6	ENSG00000105993.14	5.88293	0.922809	0.00829288	UP	ON	protein coding
chr7:63505799..63505904,+	p1@ZNF727	RP11-3N2.13	ENSG00000214652.5	5.87948	2.49469	0.000401608	UP		pseudogene			ON	ON
chr2:37789618..37789635,+	p@chr2:37789618..37789635,+		NA	5.8779	1.40808	0.000493889	UP	ON	linc	NA	NA	NA	NA
chr17:46724682..46724718,-	p2@ENST00000433510	RP11-357H14.17	ENSG00000272763.1	5.877	0.974789	3.01778e-05	UP	ON	linc	UP	UP	ON	ON
chr10:91738412..91738433,+	p2@SNRPD2P1	SNRPD2P1	ENSG00000228938.3	5.87606	1.56019	0.00100199	UP	ON	pseudogene
chr1:15653374..15653410,+	p5@FHAD1	FHAD1		5.87604	0.996527	0.0432607	UP		protein coding	DOWN	DOWN	ON
chr1:211307404..211307472,-	p1@KCNH1	KCNH1	ENSG00000143473.11	5.87326	0.790386	0.0243438	UP		protein coding	UP	UP
chr5:140579139..140579161,+	p2@PCDHB11	PCDHB11	ENSG00000197479.6	5.86474	0.980984	0.000323155	UP	ON	protein coding		UP	ON
chr5:58883397..58883426,-	p@chr5:58883397..58883426,-	PDE4D	NA	5.86146	0.952391	0.0144416	UP	ON	protein coding gene body		DOWN
chr4:159131630..159131647,+	p1@TMEM144	TMEM144	ENSG00000164124.10	5.86126	1.55152	0.0024144	UP	ON	protein coding
chr21:44842554..44842566,-	p@chr21:44842554..44842566,-	SIK1	NA	5.86001	0.972852	0.00695692	UP	ON	protein coding gene body
chr12:79258547..79258607,+	p1@SYT1	SYT1	ENSG00000067715.13	5.85923	2.415	3.08573e-05	UP		protein coding	UP	UP
chrX:115594160..115594172,-	p2@CXorf61	CXorf61	ENSG00000204019.4	5.85529	0.975077	0.000451158	UP	ON	protein coding	UP	UP	ON	ON
chr7:29186192..29186222,+	p2@CHN2	CHN2	ENSG00000106069.20	5.85337	0.979956	0.000641364	UP	ON	protein coding				ON
chr11:17565907..17565933,-	p1@USH1C	USH1C	ENSG00000006611.15	5.8514	0.977169	0.0092566	UP	ON	protein coding	UP	UP
chr13:102569895..102569908,-	p@chr13:102569895..102569908,-	FGF14	NA	5.85101	0.846063	0.0327858	UP		protein coding gene body		DOWN		ON
chr14:77415048..77415092,-	p@chr14:77415048..77415092,-		NA	5.85066	0.936987	0.000657433	UP	ON	linc	NA	NA	NA	NA
chr4:158141899..158141980,+	p1@GRIA2	GRIA2		5.85033	0.757052	0.0299877	UP		protein coding	UP	UP
chr4:163085107..163085118,-	p2@FSTL5	FSTL5		5.85033	0.757052	0.0299877	UP		protein coding	UP	UP		ON
chrX:147062844..147062871,+	p1@FMR1NB	FMR1NB		5.84635	0.950265	0.0320298	UP		protein coding	UP	UP	ON	ON
chr5:14165816..14165851,+	p@chr5:14165816..14165851,+	TRIO	NA	5.84462	1.55127	0.00141801	UP	ON	protein coding gene body
chr18:55102628..55102646,+	p2@ONECUT2	ONECUT2	ENSG00000119547.5	5.84347	1.83264	3.94353e-05	UP	ON	protein coding	UP	UP		ON
chr10:70259244..70259249,+	p1@ENST00000414397	RP11-524O24.2	ENSG00000226493.1	5.84198	5.2854	1.20846e-07	UP		pseudogene			ON
chr16:28996416..28996444,+	p2@LAT	LAT	ENSG00000213658.10	5.83687	0.993799	0.0131142	UP		protein coding
chr5:11588907..11588967,-	p3@CTNND2	CTNND2		5.83655	0.970772	0.044516	UP		protein coding		DOWN	OFF	OFF
chr11:76480789..76480811,-	p@chr11:76480789..76480811,-		NA	5.83578	0.906659	0.000100295	UP	ON	other	NA	NA	NA	NA
chr5:164028220..164028240,+	p1@ENST00000519750	CTC-340A15.2		5.83504	0.976172	0.0444321	UP		antisense	NA	NA	NA	NA
chr6:148761434..148761452,+	p11@SASH1	SASH1	ENSG00000111961.16	5.83377	0.997978	0.0257067	UP		protein coding	DOWN	DOWN
chr11:69061636..69061648,+	p3@MYEOV	MYEOV	ENSG00000172927.3	5.83299	1.98237	6.27108e-08	UP	ON	protein coding	UP	UP		ON
chr3:98250809..98250829,+	p1@GPR15	GPR15		5.82561	0.970062	0.0451484	UP		protein coding
chr1:159859984..159860011,+	p@chr1:159859984..159860011,+		NA	5.825	2.94934	0.00285942	UP		lncrna	NA	NA	NA	NA
chr12:74794757..74794765,-	p@chr12:74794757..74794765,-	RP11-81H3.2	NA	5.82305	0.953502	1.01084e-05	UP	ON	linc	NA	NA	NA	NA
chr19:55700844..55700903,+	p1@uc002qjr.2		NA	5.82292	2.14283	6.60691e-07	UP	ON	protein coding	NA	NA	NA	NA
chr1:235813034..235813097,-	p1@GNG4	GNG4	ENSG00000168243.10	5.82279	3.54065	1.14428e-05	UP		protein coding	UP	UP
chr2:234888474..234888517,+	p7@TRPM8	TRPM8		5.82216	0.967669	0.0363503	UP		protein coding	UP	UP	ON	ON
chr20:57414795..57414811,+	p10@GNAS	GNAS		5.81962	0.936518	0.0140541	UP	ON	protein coding
chr18:40857493..40857505,-	p4@SYT4	SYT4		5.81775	0.735577	0.030889	UP		protein coding			OFF	OFF
chr3:192445319..192445395,-	p1@FGF12	FGF12		5.81775	0.735577	0.030889	UP		protein coding		UP
chr4:132300906..132300930,+	p1@ENST00000500169	RP11-314N14.1	ENSG00000250102.5	5.81193	0.962007	0.0121567	UP		linc	NA	NA	NA	NA
chr1:183387499..183387543,-	p2@NMNAT2	NMNAT2	ENSG00000157064.10	5.81075	2.2071	1.3119e-05	UP	ON	protein coding	UP		ON
chrX:140336645..140336655,-	p1@SPANXC	SPANXC	ENSG00000198573.6	5.8098	0.969285	0.0143586	UP		protein coding	UP	UP	ON	ON
chr13:97794052..97794099,+	p2@MBNL2		NA	5.8049	2.3899	9.03677e-08	UP	ON	protein coding	NA	NA	NA	NA
chr3:157217328..157217355,-	p3@VEPH1	VEPH1	ENSG00000197415.11	5.79806	0.944969	0.000228587	UP	ON	protein coding	DOWN	DOWN
chr1:160287068..160287094,+	p1@SUMO1P3	SUMO1P3	ENSG00000235082.2	5.7976	1.99655	0.000114637	UP		pseudogene
chr11:17498348..17498431,-	p1@ABCC8	ABCC8	ENSG00000006071.11	5.79566	1.13256	0.00545867	UP	ON	protein coding			OFF	OFF
chr6:166399688..166399710,-	p1@ENST00000535229,p1@uc003qup.1	PDE10A	ENSG00000112541.9	5.79341	0.917516	0.00400428	UP	ON	protein coding
chr19:58571896..58571933,-	p@chr19:58571896..58571933,-		NA	5.79129	0.960618	0.0257361	UP		lncrna	NA	NA	NA	NA
chr1:203096870..203096885,+	p3@ADORA1	ADORA1	ENSG00000163485.15	5.79096	0.896569	0.0189252	UP		protein coding	UP
chr7:100810718..100810739,-	p@chr7:100810718..100810739,-		NA	5.79051	0.964943	0.0186348	UP	ON	protein coding	NA	NA	NA	NA
chr3:63804973..63804980,+	p3@C3orf49	C3orf49		5.78561	0.93787	0.0465472	UP		protein coding		DOWN		OFF
chr18:70210391..70210400,-	p@chr18:70210391..70210400,-	CBLN2		5.7844	0.713829	0.0318079	UP		protein coding	UP	UP
chr2:108602728..108602775,+	p2@SLC5A7	SLC5A7		5.7844	0.713829	0.0318079	UP		protein coding	DOWN	UP	OFF	OFF
chr11:69061594..69061635,+	p1@MYEOV	MYEOV	ENSG00000172927.3	5.7828	5.50921	8.55242e-10	UP		protein coding	UP	UP		ON
chr19:5352533..5352545,+	p@chr19:5352533..5352545,+		NA	5.78195	0.896778	2.75533e-05	UP	ON	not annotated	NA	NA	NA	NA
chr11:76480816..76480852,-	p@chr11:76480816..76480852,-		NA	5.78008	0.87701	5.99751e-05	UP	ON	lncrna	NA	NA	NA	NA
chr2:219065015..219065047,+	p1@HMGB1P9	HMGB1P9	ENSG00000224159.1	5.77614	1.27202	0.000563448	UP	ON	pseudogene
chr17:46692603..46692621,-	p6@HOXB8	HOXB8	ENSG00000120068.6	5.77565	0.783281	0.0211646	UP		protein coding	UP	UP
chrX:152486087..152486103,-	p2@MAGEA1	MAGEA1		5.77521	0.931193	0.0472809	UP		protein coding	UP	UP	ON	ON
chr14:88471472..88471500,+	p1@GPR65	GPR65		5.77466	1.66618	0.0445769	UP		protein coding	DOWN	DOWN
chr18:3383425..3383441,-	p@chr18:3383425..3383441,-		NA	5.77368	0.754673	0.026315	UP		linc	NA	NA	NA	NA
chr2:240196457..240196486,-	p@chr2:240196457..240196486,-	HDAC4	NA	5.77367	0.901546	0.000316382	UP	ON	protein coding gene body
chr7:5834097..5834103,+	p@chr7:5834097..5834103,+			5.77217	0.901992	0.0476196	UP		linc	NA	NA	NA	NA
chr11:4719072..4719089,-	p1@OR51E2	OR51E2	ENSG00000167332.7	5.76998	0.871899	0.0235235	UP		protein coding	UP	UP		ON
chr17:64225508..64225539,-	p1@APOH	APOH		5.76601	0.92676	0.0472082	UP		protein coding		DOWN	OFF	OFF
chr14:80665112..80665114,-	p@chr14:80665112..80665114,-	DIO2		5.75949	0.897002	0.0131464	UP	ON	protein coding gene body	UP	UP
chr7:107883608..107883632,-	p15@NRCAM	NRCAM		5.75561	0.920116	0.0479663	UP		protein coding		UP
chr3:238509..238547,+	p2@CHL1	CHL1		5.75417	0.917737	0.0480021	UP		protein coding	UP			ON
chr1:45988542..45988573,-	p2@PRDX1	PRDX1	ENSG00000117450.13	5.7519	1.71179	4.66898e-07	UP	ON	protein coding		UP
chr16:71392619..71392635,+	p1@CALB2	CALB2	ENSG00000172137.18	5.75174	4.30551	1.02583e-08	UP		protein coding			OFF
chr22:31672514..31672548,+	p1@BC008706	LIMK2	NA	5.75087	0.859602	0.00470539	UP	ON	protein coding gene body
chr8:13988549..13988555,+	p@chr8:13988549..13988555,+			5.75027	0.691802	0.0328196	UP		lncrna	NA	NA	NA	NA
chr1:92414952..92414965,+	p1@BRDT	BRDT	ENSG00000137948.18	5.74792	0.79484	0.0235896	UP		protein coding	UP	UP	ON	ON
chr12:92028700..92028705,+	p@chr12:92028700..92028705,+			5.74785	0.920159	0.0486513	UP		not annotated	NA	NA	NA	NA
chr21:39493560..39493573,+	p2@DSCR8	DSCR8	ENSG00000198054.11	5.74741	0.911906	0.0272017	UP		protein coding	UP	UP	ON	ON
chr12:1609668..1609679,+	p3@LOC100292680		NA	5.74496	0.858577	0.00441176	UP	ON	linc	NA	NA	NA	NA
chr2:36806197..36806224,-	p11@FEZ2	FEZ2	ENSG00000171055.14	5.74428	1.40299	0.00390746	UP	ON	protein coding
chr8:3040586..3040628,-	p7@CSMD1	CSMD1	ENSG00000183117.18	5.74291	0.877745	0.00855512	UP	ON	protein coding			OFF	OFF
chr18:5540384..5540434,-	p6@EPB41L3	EPB41L3	ENSG00000082397.16	5.74128	0.905245	0.024663	UP		protein coding		DOWN
chr7:150688140..150688162,+	p7@NOS3	NOS3	ENSG00000164867.10	5.74115	0.946365	0.0102691	UP	ON	protein coding
chr6:119399805..119399860,-	p1@FAM184A	FAM184A	ENSG00000111879.18	5.73896	0.863822	7.01915e-06	UP	ON	protein coding	DOWN	DOWN
chr1:197886461..197886558,+	p1@LHX9	LHX9	ENSG00000143355.15	5.73661	1.26182	0.00179456	UP	ON	protein coding			OFF	OFF
chr17:63898371..63898416,-	p@chr17:63898371..63898416,-	CEP112		5.73507	1.44822	0.0426357	UP		protein coding gene body	NA	NA	NA	NA
chr7:50633078..50633140,-	p1@DDC	DDC		5.73405	0.906017	0.035416	UP		protein coding	UP	UP	OFF	OFF
chr7:28998207..28998227,-	p6@TRIL	AC005013.1		5.72999	0.925068	0.0337557	UP		pseudogene	NA	NA	NA	NA
chr12:96337097..96337126,+	p1@AMDHD1	AMDHD1	ENSG00000139344.7	5.72871	2.26093	0.00132121	UP	ON	protein coding				OFF
chr13:79177703..79177729,-	p2@POU4F1	POU4F1	ENSG00000152192.7	5.72783	1.40202	5.74011e-05	UP	ON	protein coding	UP	UP	ON	ON
chr7:134005080..134005095,-	p@chr7:134005080..134005095,-			5.72248	1.85105	0.0213528	UP		protein coding	NA	NA	NA	NA
chr5:138609489..138609542,+	p8@MATR3	MATR3	ENSG00000280987.3	5.72014	0.854309	0.000199439	UP	ON	protein coding
chr8:63077355..63077381,-	p@chr8:63077355..63077381,-		NA	5.7114	1.34518	8.9918e-06	UP	ON	linc	NA	NA	NA	NA
chr17:46692287..46692317,-	p7@HOXB8	HOXB8	ENSG00000120068.6	5.70836	0.798322	0.0160993	UP	ON	protein coding	UP	UP
chr2:233740519..233740548,+	p1@C2orf82	C2orf82	ENSG00000182600.9	5.70678	3.35972	0.000126025	UP		protein coding	UP	UP	ON	ON
chr7:94536898..94536998,+	p1@PPP1R9A	PPP1R9A	ENSG00000158528.11	5.70402	2.66576	5.89388e-17	UP	ON	protein coding		DOWN
chr2:176994408..176994492,+	p1@HOXD8	HOXD8	ENSG00000175879.8	5.69744	1.64159	0.0002434	UP		protein coding		UP
chr17:2652910..2652993,-	p@chr17:2652910..2652993,-	RP11-74E22.4		5.6972	0.678214	0.0283399	UP		pseudogene	NA	NA	NA	NA
chr3:85008089..85008189,+	p1@CADM2	CADM2	ENSG00000175161.13	5.69681	2.20062	4.38232e-06	UP	ON	protein coding			OFF
chr16:65159735..65159744,-	p@chr16:65159735..65159744,-	CDH11	ENSG00000140937.13	5.6968	0.870677	0.028339	UP		protein coding
chr7:72395617..72395665,+	p3@POM121	POM121	ENSG00000196313.11	5.68871	0.825177	0.0019814	UP	ON	protein coding
chr12:127256772..127256813,-	p1@LOC387895	LINC00944	ENSG00000256128.5	5.68834	0.863686	4.70797e-06	UP	ON	linc	NA	NA	NA	NA
chr12:66036083..66036098,-	p3@ENST00000539653	RP11-230G5.2	ENSG00000250748.6	5.68535	1.44974	0.0189252	UP		linc	NA	NA	NA	NA
chr14:36983036..36983064,-	p2@SFTA3	SFTA3	ENSG00000229415.9	5.68334	1.4408	0.00585509	UP	ON	protein coding		DOWN		OFF
chr12:131478468..131478480,-	p1@ENST00000536673	RP11-76C10.5	ENSG00000256151.1	5.68309	1.25705	0.00172658	UP	ON	linc				OFF
chr4:156775910..156775941,+	p2@TDO2	TDO2	ENSG00000151790.8	5.68173	1.4144	4.08886e-05	UP	ON	protein coding	UP			ON
chr10:94833642..94833655,+	p1@CYP26A1	CYP26A1	ENSG00000095596.11	5.67955	0.846425	0.0100092	UP	ON	protein coding	UP	UP		ON
chr1:151689259..151689285,-	p1@CELF3	CELF3		5.67951	0.646883	0.0350546	UP		protein coding	UP	UP
chr2:2334997..2335053,-	p1@MYT1L	MYT1L		5.67951	0.646883	0.0350546	UP		protein coding		UP
chr12:112443830..112443870,-	p2@TMEM116	TMEM116	ENSG00000198270.12	5.67836	1.67168	0.000207801	UP	ON	protein coding
chrX:151903235..151903247,+	p3@CSAG1	CSAG1	ENSG00000198930.12	5.67826	0.769026	0.0119913	UP	ON	protein coding	UP	UP	ON	ON
chr6:117586713..117586727,+	p1@VGLL2	VGLL2		5.67786	0.77487	0.0306149	UP		protein coding	UP	UP
chr5:180708354..180708380,+	p1@ENST00000412295	CTC-338M12.9	ENSG00000248103.1	5.67715	0.832634	0.0141453	UP	ON	linc	UP	UP	ON	ON
chr3:189349162..189349207,+	p2@TP63	TP63	ENSG00000073282.12	5.67308	1.55063	0.00440908	UP		protein coding	UP	UP	ON
chr2:202272186..202272220,-	p@chr2:202272186..202272220,-	TRAK2	NA	5.66745	1.21624	0.00295368	UP	ON	protein coding gene body		DOWN
chr3:238456..238502,+	p1@CHL1	CHL1		5.6674	0.862444	0.0371737	UP		protein coding	UP			ON
chr5:89854595..89854632,+	p1@GPR98	GPR98	ENSG00000164199.15	5.66725	1.53278	0.000732729	UP	ON	protein coding			ON
chr17:80317121..80317128,+	p1@TEX19	TEX19	ENSG00000182459.4	5.66448	1.70978	0.00152711	UP		protein coding	UP	UP	ON	ON
chr4:819884..819900,-	p2@CPLX1	CPLX1	ENSG00000168993.14	5.66	1.09043	0.000303469	UP	ON	protein coding	UP		ON	ON
chr20:57414743..57414785,+	p18@GNAS	GNAS	ENSG00000087460.23	5.65975	0.835476	0.00827218	UP	ON	protein coding
chr5:58295680..58295699,-	p36@PDE4D	PDE4D		5.65887	0.856831	0.0368083	UP		protein coding		DOWN
chr20:62697597..62697638,+	p5@TCEA2	TCEA2	ENSG00000171703.16	5.65727	0.85534	0.000877327	UP	ON	protein coding
chr2:176994919..176994931,+	p2@HOXD8	HOXD8	ENSG00000175879.8	5.65708	0.815717	0.0130305	UP	ON	protein coding		UP
chr8:24771265..24771282,+	p1@NEFM	NEFM	ENSG00000104722.13	5.6554	3.87249	0.0217085	UP		protein coding	UP	UP		OFF
chr6:73785930..73785949,-	p@chr6:73785930..73785949,-		NA	5.65133	0.814528	0.0192561	UP		lncrna	NA	NA	NA	NA
chr19:6502312..6502328,-	p1@TUBB4A	TUBB4A	ENSG00000104833.10	5.64824	2.83463	0.0081167	UP		protein coding	NA	NA	NA	NA
chrX:137793826..137793893,-	p2@FGF13	FGF13	ENSG00000129682.13	5.64738	0.845967	0.00914761	UP	ON	protein coding	UP
chr5:10316445..10316475,+	p@chr5:10316445..10316475,+		NA	5.63828	0.855772	0.00901392	UP	ON	linc	NA	NA	NA	NA
chrX:55246818..55246829,+	p2@PAGE5	PAGE5	ENSG00000158639.12	5.63823	0.833091	0.0297344	UP		protein coding	UP	UP
chr17:46703528..46703549,-	p5@HOXB9	HOXB9	ENSG00000170689.9	5.63801	0.79117	7.74279e-05	UP	ON	protein coding	UP	UP	ON	ON
chr3:128207349..128207386,-	p3@GATA2	GATA2	ENSG00000179348.11	5.63749	0.807388	5.90852e-05	UP	ON	protein coding	DOWN	DOWN
chr2:78769157..78769171,-	p2@uc002snv.3		NA	5.63586	0.757856	0.0139646	UP	ON	pseudogene	NA	NA	NA	NA
chr13:88463490..88463524,-	p1@BC040238	RP11-471M2.3	ENSG00000272046.1	5.63223	0.771595	0.00174256	UP	ON	linc
chr1:156786243..156786257,-	p6@SH2D2A	SH2D2A	ENSG00000027869.11	5.63117	2.02701	0.0307206	UP		protein coding
chr1:183387459..183387498,-	p1@NMNAT2	NMNAT2	ENSG00000157064.10	5.62369	2.02781	1.16094e-05	UP		protein coding	UP		ON
chr6:105624123..105624136,-	p2@POPDC3	POPDC3	NA	5.62152	0.830359	0.00214841	UP	ON	protein coding gene body	UP	UP	OFF
chr10:72432217..72432299,+	p1@ADAMTS14	ADAMTS14	ENSG00000138316.10	5.61857	0.790728	0.0023085	UP	ON	protein coding	UP	UP
chr6:96463840..96463892,+	p1@FUT9	FUT9	ENSG00000172461.10	5.61724	1.26066	0.000110674	UP	ON	protein coding	UP	UP	ON	ON
chr7:142511089..142511121,-	p1@TRBV30	TRBV30		5.61661	0.837914	0.0365689	UP		other	NA	NA	NA	NA
chr2:175366659..175366666,+	p1@ENST00000313760,p1@ENST00000545980	AC010894.4	ENSG00000179997.8	5.61647	0.770385	0.00608247	UP	ON	pseudogene		NA
chr3:170626612..170626637,+	p@chr3:170626612..170626637,+		NA	5.61205	0.810028	0.000196736	UP	ON	linc	NA	NA	NA	NA
chr11:69002385..69002407,-	p@chr11:69002385..69002407,-		NA	5.61124	0.798793	0.0295403	UP		linc	NA	NA	NA	NA
chr16:65160001..65160033,-	p@chr16:65160001..65160033,-	CDH11	ENSG00000140937.13	5.61066	2.77265	0.0026338	UP		protein coding
chr5:57878895..57878929,+	p1@RAB3C	RAB3C	ENSG00000152932.7	5.60991	0.737064	0.0286857	UP		protein coding	UP			OFF
chr16:28996446..28996491,+	p1@LAT	LAT	ENSG00000213658.10	5.60887	2.04956	0.0215435	UP		protein coding
chr5:18746294..18746324,-	p2@ENST00000512978	CTD-2023M8.1	ENSG00000248693.1	5.6074	0.808796	4.1411e-06	UP	ON	linc	UP	UP	ON	ON
chr8:141018677..141018706,-	p5@TRAPPC9	TRAPPC9		5.60513	0.600772	0.0375759	UP		protein coding
chr1:31943959..31943987,+	p@chr1:31943959..31943987,+		NA	5.60512	0.842124	0.00833524	UP	ON	not annotated	NA	NA	NA	NA
chr16:12995448..12995467,+	p2@SHISA9	SHISA9	ENSG00000237515.7	5.60308	0.727792	0.0232437	UP	ON	protein coding	UP	UP
chr9:126774018..126774055,+	p1@LHX2	LHX2	ENSG00000106689.10	5.60196	0.79711	0.000438592	UP	ON	protein coding	UP	UP	ON	ON
chr6:28926723..28926729,+	p@chr6:28926723..28926729,+			5.60037	0.793857	0.0407376	UP		not annotated	NA	NA	NA	NA
chr1:79654152..79654178,-	p@chr1:79654152..79654178,-		NA	5.59836	0.82952	0.00516879	UP	ON	pseudogene	NA	NA	NA	NA
chr19:51472222..51472234,-	p9@KLK6	KLK6	ENSG00000167755.13	5.59767	0.702241	0.0141207	UP	ON	protein coding	UP	UP	ON	ON
chr9:138394283..138394314,+	p9@MRPS2	MRPS2		5.59767	0.819193	0.0403658	UP		protein coding
chr9:102584262..102584276,+	p1@NR4A3	NR4A3	ENSG00000119508.17	5.59615	2.46846	1.30324e-05	UP	ON	protein coding	DOWN	DOWN
chr17:76628125..76628162,-	p@chr17:76628125..76628162,-	CTD-2357A8.3	ENSG00000267123.5	5.59532	1.36385	8.52864e-05	UP	ON	linc	NA	NA	NA	NA
chrX:120331616..120331638,+	p@chrX:120331616..120331638,+		NA	5.59468	0.799852	5.25987e-05	UP	ON	linc	NA	NA	NA	NA
chrY:27869488..27869491,+	p1@ENST00000516617	USP9YP30	ENSG00000252426.1	5.59316	0.783195	0.0108791	UP	ON	pseudogene	NA	NA
chr2:84743562..84743651,+	p1@DNAH6	DNAH6	ENSG00000115423.18	5.59164	0.799434	0.000168738	UP	ON	protein coding	DOWN	DOWN	OFF	OFF
chr17:46678419..46678455,-	p@chr17:46678419..46678455,-	HOXB3	NA	5.58656	0.776943	0.00113613	UP	ON	protein coding gene body	UP	UP
chr22:21457289..21457321,+	p1@BCRP2	BCRP2	ENSG00000169668.11	5.58556	0.783232	0.00244942	UP	ON	pseudogene	NA	NA	NA	NA
chr8:23702223..23702240,-	p@chr8:23702223..23702240,-	STC1	NA	5.58321	1.2532	0.00250505	UP	ON	protein coding gene body
chr14:28733614..28733626,+	p1@uc001wqd.2	BNIP3P1	ENSG00000197358.9	5.58296	0.790857	0.00337628	UP	ON	pseudogene			ON
chr16:54908072..54908081,-	p@chr16:54908072..54908081,-		NA	5.58212	0.807686	0.0230544	UP		linc	NA	NA	NA	NA
chr1:149804218..149804222,+	p11@HIST2H4A,p11@HIST2H4B	HIST2H4A	ENSG00000270882.2	5.58044	4.17228	0.000320855	UP		protein coding	UP	UP
chrX:108779021..108779067,+	p3@NXT2	NXT2	ENSG00000101888.11	5.58017	0.803003	0.0378572	UP		protein coding		UP
chr4:158745392..158745410,-	p@chr4:158745392..158745410,-		NA	5.57909	0.643574	0.00971673	UP	ON	linc	NA	NA	NA	NA
chr13:46785927..46785972,-	p5@LCP1	LCP1	ENSG00000136167.13	5.57548	1.37712	0.00204954	UP	ON	protein coding		DOWN
chr5:54157..54174,+	p@chr5:54157..54174,+		NA	5.57281	1.13131	0.00575313	UP	ON	not annotated	NA	NA	NA	NA
chr2:193059634..193059664,-	p1@TMEFF2	TMEFF2	ENSG00000144339.11	5.57279	0.615714	0.0122363	UP	ON	protein coding				OFF
chr4:6765228..6765254,+	p@chr4:6765228..6765254,+		NA	5.57206	1.52397	0.000183611	UP	ON	linc	NA	NA	NA	NA
chr1:156631176..156631189,-	p3@ENST00000448869	RP11-284F21.7	ENSG00000229953.1	5.57152	1.20421	1.54125e-08	UP	ON	antisense	UP	UP	ON	ON
chr17:46724016..46724042,-	p3@ENST00000433510	RP11-357H14.17	ENSG00000272763.1	5.57106	0.775482	9.25606e-05	UP	ON	linc	UP	UP	ON	ON
chr7:57639694..57639702,+	p@chr7:57639694..57639702,+		NA	5.5675	0.803728	0.0172195	UP	ON	pseudogene	NA	NA	NA	NA
chr1:50574585..50574627,+	p1@ELAVL4	ELAVL4		5.56645	0.577253	0.0389915	UP		protein coding	UP	UP
chr14:80678512..80678529,-	p1@DIO2	DIO2	ENSG00000211448.11	5.56281	2.98156	0.00644326	UP		protein coding	UP	UP
chr1:156631192..156631208,-	p2@ENST00000448869	RP11-284F21.7	ENSG00000229953.1	5.56277	3.25631	1.90443e-12	UP		antisense	UP	UP	ON	ON
chr9:123165695..123165711,-	p11@CDK5RAP2	CDK5RAP2	ENSG00000136861.17	5.56276	0.733469	0.00584571	UP	ON	protein coding
chr6:45399439..45399491,+	p@chr6:45399439..45399491,+	RUNX2		5.56158	0.747238	0.0441473	UP		protein coding gene body	UP	UP
chr17:26697304..26697335,-	p1@SEBOX,p1@VTN	VTN	NA	5.55611	0.779467	0.0235184	UP		protein coding	UP			OFF
chr8:128270900..128270912,-	p@chr8:128270900..128270912,-			5.55487	0.807158	0.0469245	UP		not annotated	NA	NA	NA	NA
chr20:36011978..36012014,+	p6@SRC	SRC	ENSG00000197122.11	5.55242	2.80103	0.00987033	UP		protein coding
chr3:89156799..89156831,+	p3@EPHA3	EPHA3	ENSG00000044524.10	5.55045	0.71701	0.0229195	UP		protein coding
chr1:38218857..38218878,-	p3@EPHA10	EPHA10	ENSG00000183317.16	5.54924	0.763203	3.72535e-06	UP	ON	protein coding	UP			OFF
chr1:66798089..66798106,+	p3@PDE4B	PDE4B	ENSG00000184588.17	5.54569	2.45052	0.00132121	UP		protein coding
chr7:102613997..102614016,+	p1@ENST00000420058	NFE4	ENSG00000230257.1	5.54251	0.802833	0.0104721	UP	ON	antisense	UP	UP	ON	ON
chr9:30925270..30925284,-	p@chr9:30925270..30925284,-		NA	5.54203	0.784896	0.0246974	UP		linc	NA	NA	NA	NA
chr20:58508702..58508728,-	p3@SYCP2	SYCP2	ENSG00000196074.12	5.54081	0.786025	0.00356195	UP	ON	protein coding	UP	UP	ON	ON
chr12:52445218..52445237,+	p1@NR4A1	NR4A1	ENSG00000123358.19	5.54066	6.69207	1.16514e-07	UP		protein coding	DOWN	DOWN
chr11:59844699..59844715,+	p1@ENST00000528891	RP11-736I10.2	ENSG00000255331.1	5.53585	0.724877	0.00744867	UP	ON	pseudogene	NA
chr21:45826259..45826283,+	p6@TRPM2	TRPM2	NA	5.5353	0.806452	0.0402363	UP		protein coding gene body	UP	UP
chr1:36335351..36335418,+	p3@EIF2C1	AGO1	ENSG00000092847.11	5.53308	0.711641	0.0209324	UP		protein coding	NA	NA	NA	NA
chr4:155484155..155484177,+	p1@FGB	FGB	ENSG00000171564.11	5.52836	0.73833	0.0186447	UP	ON	protein coding	UP	UP
chr11:22214569..22214642,+	p1@ANO5	ANO5	ENSG00000171714.10	5.52478	0.736317	0.000310396	UP	ON	protein coding		DOWN		OFF
chr6:100061724..100061753,+	p1@PRDM13	PRDM13	NA	5.52351	1.12897	0.000557938	UP	ON	protein coding gene body	UP	UP	ON	ON
chr3:54156570..54156627,+	p1@CACNA2D3	CACNA2D3	ENSG00000157445.14	5.52333	1.48217	0.00426396	UP		protein coding		UP
chr9:35754253..35754279,-	p1@MSMP	MSMP		5.5229	0.773719	0.0452053	UP		protein coding	UP
chr12:124950936..124950962,-	p@chr12:124950936..124950962,-	NCOR2	NA	5.5185	0.795083	0.0191077	UP		protein coding gene body
chr11:17565951..17565982,-	p2@USH1C	USH1C	ENSG00000006611.15	5.51819	0.767797	0.020001	UP		protein coding	UP	UP
chr3:25894063..25894094,+	p@chr3:25894063..25894094,+		NA	5.51519	0.793456	0.035505	UP		linc	NA	NA	NA	NA
chr5:38468399..38468427,-	p1@ENST00000510469	CTD-2263F21.1	ENSG00000251257.2	5.51323	2.82858	0.00203514	UP		antisense			ON	ON
chr10:69597886..69597910,-	p1@DNAJC12	DNAJC12	ENSG00000108176.14	5.51243	2.37792	8.20348e-06	UP		protein coding	UP	UP	ON
chr2:176981499..176981522,+	p2@HOXD10	HOXD10	ENSG00000128710.5	5.51199	0.649575	0.0452133	UP		protein coding		UP		ON
chr14:105935396..105935413,+	p4@MTA1	MTA1	ENSG00000182979.17	5.50921	0.703337	0.0161909	UP	ON	protein coding		UP
chr10:101542550..101542573,+	p5@ABCC2	ABCC2	ENSG00000023839.10	5.50895	0.762187	0.0147421	UP	ON	protein coding	UP	UP
chr14:72399114..72399238,+	p1@RGS6	RGS6	ENSG00000182732.16	5.50885	0.672043	0.0445769	UP		protein coding			OFF	OFF
chr2:115918927..115918946,-	p2@LOC389023	AC066593.1	ENSG00000235026.5	5.50816	0.612546	0.0358828	UP		antisense	NA	NA	NA	NA
chr19:51471965..51471976,-	p5@KLK6	KLK6	ENSG00000167755.13	5.50655	1.57396	0.00805646	UP		protein coding	UP	UP	ON	ON
chr7:157361654..157361695,-	p1@PTPRN2	PTPRN2	NA	5.50581	3.17816	0.0066184	UP		protein coding gene body		DOWN
chr10:114135045..114135058,+	p12@ACSL5	ACSL5	ENSG00000197142.10	5.50568	0.789172	0.0195636	UP		protein coding		DOWN
chr7:112063175..112063191,+	p3@IFRD1	IFRD1	ENSG00000006652.13	5.50482	1.10975	1.24289e-05	UP	ON	protein coding
chr8:61193947..61193965,-	p1@CA8	CA8	ENSG00000178538.9	5.49317	1.4897	0.000677642	UP	ON	protein coding				OFF
chr8:26371381..26371398,-	p1@PNMA2	PNMA2	ENSG00000240694.8	5.49132	2.59318	7.52849e-06	UP		protein coding		DOWN
chr1:246887391..246887408,+	p3@SCCPDH	SCCPDH	ENSG00000143653.9	5.49058	1.89191	0.000677642	UP		protein coding
chr6:127439838..127439849,+	p2@RSPO3	RSPO3	ENSG00000146374.13	5.48975	0.75431	0.0256924	UP		protein coding			ON
chr19:51412603..51412620,-	p2@KLK4	KLK4		5.48582	0.529255	0.0420098	UP		protein coding	UP	UP
chr6:147453079..147453129,-	p1@ENST00000431143,p1@uc003qlv.2	STXBP5-AS1		5.48582	0.529255	0.0420098	UP		antisense	NA	NA	NA	NA
chr3:114343870..114343887,-	p9@ZBTB20	ZBTB20	ENSG00000181722.15	5.48024	0.723109	1.56207e-06	UP	ON	protein coding
chr4:89282612..89282616,+	p@chr4:89282612..89282616,+		NA	5.47644	0.738612	0.0128268	UP	ON	linc	NA	NA	NA	NA
chr19:35810228..35810291,+	p@chr19:35810228..35810291,+	CD22	ENSG00000012124.14	5.46962	1.6902	0.000782636	UP		protein coding		DOWN
chr17:50906109..50906121,-	p@chr17:50906109..50906121,-		NA	5.46932	0.729317	0.0202095	UP		linc	NA	NA	NA	NA
chr20:55841662..55841736,-	p1@BMP7	BMP7	ENSG00000101144.12	5.46553	2.07228	0.00142098	UP		protein coding	UP	UP		ON
chr2:130737223..130737244,+	p1@RAB6C	RAB6C	ENSG00000222014.5	5.46507	0.713592	0.00716599	UP	ON	protein coding
chr1:169555684..169555705,-	p2@F5	F5	ENSG00000198734.10	5.4643	1.18456	0.00488587	UP	ON	protein coding	UP
chrX:86983685..86983696,-	p@chrX:86983685..86983696,-		NA	5.46323	0.689762	0.0188546	UP	ON	linc	NA	NA	NA	NA
chr10:134258649..134258668,+	p1@C10orf91	C10orf91	ENSG00000180066.9	5.46191	0.725533	0.00511448	UP	ON	protein coding	UP	UP		ON
chr1:91123303..91123309,+	p1@ENST00000362796	U3	ENSG00000199666.1	5.46112	1.33757	0.00421414	UP		small ncRNAs	NA	NA	NA	NA
chr2:176973275..176973300,+	p4@HOXD10	AC009336.1	ENSG00000216193.2	5.45808	0.596697	0.0486303	UP		small ncRNAs	NA	NA	NA	NA
chr12:58026451..58026469,-	p2@B4GALNT1	B4GALNT1	ENSG00000135454.13	5.45643	0.687946	5.26941e-05	UP	ON	protein coding	UP	UP		ON
chr7:140772393..140772442,+	p@chr7:140772393..140772442,+		NA	5.45465	1.31163	0.00530906	UP	ON	protein coding	NA	NA	NA	NA
chr5:92498140..92498169,-	p@chr5:92498140..92498169,-		NA	5.45293	0.691773	0.0187943	UP	ON	linc	NA	NA	NA	NA
chr7:119547421..119547435,-	p1@ENST00000426413,p1@ENST00000431071	RP11-328J2.1	ENSG00000225546.5	5.45051	0.735252	0.0371788	UP		linc	NA	NA	NA	NA
chr2:238767346..238767363,+	p2@RAMP1	RAMP1	ENSG00000132329.10	5.45007	0.744735	0.0215731	UP	ON	protein coding	UP
chr12:117197711..117197750,+	p4@RNFT2	RNFT2	NA	5.44939	0.700681	0.0132991	UP	ON	protein coding gene body	UP	UP		ON
chr6:162477886..162477932,-	p@chr6:162477886..162477932,-	PARK2		5.44908	0.729149	0.0433595	UP		protein coding gene body
chr20:44421137..44421162,+	p3@DNTTIP1	DNTTIP1	ENSG00000101457.12	5.447	1.75822	0.00303025	UP	ON	protein coding	UP
chr20:62130474..62130552,-	p2@EEF1A2	EEF1A2	ENSG00000101210.10	5.44527	3.3074	3.84892e-08	UP		protein coding	UP	UP
chr8:62200509..62200590,+	p1@CLVS1	CLVS1		5.44377	0.504762	0.0436554	UP		protein coding		UP
chr1:63789403..63789435,-	p1@ENST00000431294	RP4-792G4.2	ENSG00000230798.5	5.44301	0.689339	0.00735848	UP	ON	antisense	NA	NA	NA	NA
chr10:47079018..47079062,+	p@chr10:47079018..47079062,+		NA	5.44084	1.92175	0.0191496	UP		protein coding	NA	NA	NA	NA
chr14:102706939..102706979,-	p4@MOK	MOK	ENSG00000080823.21	5.43986	1.34205	0.0205525	UP		protein coding	NA	NA	NA	NA
chr6:22113608..22113630,+	p@chr6:22113608..22113630,+	CASC15	NA	5.4331	1.03793	0.0184662	UP		linc	NA	NA	NA	NA
chr1:172902854..172902870,-	p@chr1:172902854..172902870,-		NA	5.431	0.714953	0.00431182	UP	ON	linc	NA	NA	NA	NA
chr8:101170257..101170296,+	p2@SPAG1	SPAG1	ENSG00000104450.12	5.43029	2.02193	2.61594e-10	UP	ON	protein coding
chr2:219866695..219866701,-	p@chr2:219866695..219866701,-	MIR375		5.42754	0.81779	0.027764	UP		small ncRNAs	NA	NA	NA	NA
chr7:96452346..96452352,-	p@chr7:96452346..96452352,-		NA	5.42724	0.717821	0.000587555	UP	ON	not annotated	NA	NA	NA	NA
chr12:71551758..71551770,-	p5@TSPAN8	TSPAN8	ENSG00000127324.8	5.4258	1.30894	0.00710898	UP		protein coding	UP
chr7:101917447..101917479,+	p4@CUX1	CUX1	ENSG00000257923.9	5.42568	1.78453	0.000312646	UP		protein coding
chr7:156803329..156803362,-	p1@MNX1	MNX1	ENSG00000130675.14	5.42403	1.18606	5.87025e-06	UP	ON	protein coding	UP	UP	ON
chr18:55102806..55102847,+	p3@ONECUT2	ONECUT2	ENSG00000119547.5	5.42274	0.529248	0.0179124	UP	ON	protein coding	UP	UP		ON
chr18:55102598..55102623,+	p1@ONECUT2	ONECUT2	ENSG00000119547.5	5.41688	2.15954	3.24709e-06	UP		protein coding	UP	UP		ON
chr21:46424480..46424506,-	p1@LINC00162	LINC00162	ENSG00000275874.1	5.41678	0.726983	0.0214136	UP		linc	DOWN		OFF	OFF
chr18:20715474..20715486,+	p4@CABLES1	CABLES1		5.41586	1.14871	0.0104812	UP	ON	protein coding		DOWN
chr11:2924521..2924577,+	p2@SLC22A18	SLC22A18	ENSG00000110628.13	5.41476	1.30589	0.000636456	UP	ON	protein coding	UP
chr12:66036125..66036136,-	p2@ENST00000539653	RP11-230G5.2	ENSG00000250748.6	5.40548	1.91954	0.0185065	UP		linc	NA	NA	NA	NA
chr5:27472371..27472418,+	p1@LOC643401	LINC01021	ENSG00000250337.5	5.4008	2.81322	8.27206e-05	UP		linc	NA	NA	NA	NA
chr1:246382944..246382951,-	p@chr1:246382944..246382951,-	SMYD3		5.40048	0.479929	0.0455176	UP		protein coding gene body
chr18:40857368..40857384,-	p6@SYT4	SYT4		5.40048	0.479929	0.0455175	UP		protein coding			OFF	OFF
chr6:69345166..69345259,+	p1@BAI3	BAI3	ENSG00000135298.13	5.39805	0.676744	0.000296198	UP	ON	protein coding	DOWN	DOWN	OFF	OFF
chr8:121823411..121823471,+	p2@AK302130		NA	5.39598	0.699585	0.00244472	UP	ON	not annotated	NA	NA	NA	NA
chr2:233352519..233352525,-	p3@ECEL1	ECEL1	ENSG00000171551.11	5.39585	0.620809	0.0264063	UP	ON	protein coding	UP	UP	ON	ON
chr6:148501038..148501057,-	p@chr6:148501038..148501057,-		NA	5.39537	0.695752	0.00417918	UP	ON	not annotated	NA	NA	NA	NA
chr19:54024454..54024463,+	p31@ZNF331	ZNF331		5.39305	0.672448	0.0317029	UP		protein coding	DOWN	DOWN
chr9:97317348..97317379,+	p1@uc004aus.1	PCAT7	ENSG00000231806.2	5.39045	1.16768	2.99999e-07	UP	ON	antisense	UP	UP	ON	ON
chr7:74988469..74988483,+	p1@STAG3L1	STAG3L1	ENSG00000205583.13	5.38997	0.640456	0.00888556	UP	ON	pseudogene			ON	ON
chr13:113841728..113841765,-	p3@PCID2	PCID2	ENSG00000126226.21	5.38881	0.662124	9.41312e-05	UP	ON	protein coding
chr3:189027755..189027764,+	p23@TPRG1	TPRG1		5.38786	0.601375	0.0360303	UP		protein coding		UP
chr10:101691118..101691135,-	p6@DNMBP	DNMBP	NA	5.38638	1.10476	0.00483572	UP	ON	protein coding
chr7:27213258..27213279,-	p@chr7:27213258..27213279,-	HOXA10	NA	5.38353	1.15401	0.00163231	UP	ON	protein coding gene body	UP	UP		ON
chr7:96634850..96634874,+	p3@DLX6	DLX6	ENSG00000006377.10	5.38147	0.647838	0.00170321	UP	ON	protein coding	UP	UP	ON	ON
chr2:115919049..115919088,+	p2@DPP10	DPP10	ENSG00000175497.16	5.38074	1.07883	0.0124801	UP	ON	protein coding	UP	UP	OFF	OFF
chrX:68003226..68003229,+	p1@ENST00000396021	SERBP1P1	ENSG00000213740.2	5.38052	2.11386	0.000641364	UP		pseudogene			ON	ON
chr3:80727046..80727051,-	p@chr3:80727046..80727051,-		NA	5.37983	0.587147	0.0263655	UP	ON	linc	NA	NA	NA	NA
chr10:61900409..61900450,-	p13@ANK3	ANK3	ENSG00000151150.20	5.37891	0.671043	0.000287332	UP	ON	protein coding
chr4:115519550..115519571,+	p3@UGT8	UGT8	ENSG00000174607.10	5.3768	1.51626	5.24996e-08	UP	ON	protein coding	UP	UP
chr7:72569000..72569055,+	p1@GTF2IP1	RP11-396K3.1	ENSG00000233369.7	5.37364	1.55039	0.000515127	UP	ON	pseudogene	NA	NA	NA	NA
chr1:210111570..210111603,+	p1@SYT14	SYT14	ENSG00000143469.16	5.37334	0.523942	0.0357578	UP		protein coding	UP	UP	ON	ON
chr2:177001581..177001659,-	p1@ENST00000440016	HOXD-AS2	ENSG00000237380.6	5.37148	0.64511	0.0120632	UP	ON	antisense	NA	NA	NA	NA
chr16:58498194..58498236,+	p3@NDRG4	NDRG4	ENSG00000103034.14	5.37006	0.598198	0.0387273	UP		protein coding	DOWN
chr19:48753106..48753123,-	p4@CARD8	CARD8	ENSG00000105483.16	5.36995	1.72087	0.0105448	UP		protein coding		DOWN
chr8:102803163..102803211,-	p1@NCALD	NCALD	ENSG00000104490.17	5.36717	1.83582	0.00979533	UP		protein coding		DOWN
chr12:104674575..104674595,-	p3@ENST00000549807	RP11-818F20.5	ENSG00000257732.1	5.36698	0.640772	0.000474147	UP	ON	antisense	UP	UP	ON	ON
chr5:75919192..75919215,-	p1@F2RL2	F2RL2	ENSG00000164220.6	5.36583	2.79731	0.0248487	UP		protein coding	UP	UP
chr12:20975224..20975226,-	p@chr12:20975224..20975226,-		NA	5.36443	0.644565	0.00166273	UP	ON	lncrna	NA	NA	NA	NA
chr8:144490357..144490399,+	p@chr8:144490357..144490399,+		NA	5.36418	0.673102	0.000626744	UP	ON	lncrna	NA	NA	NA	NA
chrX:110341059..110341099,+	p@chrX:110341059..110341099,+	PAK3		5.36246	0.678628	0.0485082	UP		protein coding	UP		OFF	OFF
chr4:73969908..73969969,-	p7@ANKRD17	ANKRD17	ENSG00000132466.17	5.36129	0.664016	0.00732938	UP	ON	protein coding
chr9:11065064..11065090,-	p@chr9:11065064..11065090,-		NA	5.35984	0.616259	0.00458579	UP	ON	linc	NA	NA	NA	NA
chr5:76476120..76476136,+	p@chr5:76476120..76476136,+		NA	5.35881	0.647216	0.00252635	UP	ON	protein coding	NA	NA	NA	NA
chr6:127439802..127439829,+	p1@RSPO3	RSPO3	ENSG00000146374.13	5.35845	2.82844	0.015994	UP		protein coding			ON
chr14:104603410..104603431,-	p@chr14:104603410..104603431,-			5.35357	0.673737	0.0328335	UP		not annotated	NA	NA	NA	NA
chr11:63974135..63974214,+	p1@FERMT3	FERMT3	ENSG00000149781.12	5.35223	2.16147	0.0291302	UP		protein coding		DOWN
chr13:107028897..107028945,+	p1@LINC00460	LINC00460	ENSG00000233532.5	5.34459	2.83789	0.000486753	UP		linc	NA	NA	NA	NA
chrX:23352471..23352530,+	p1@PTCHD1	PTCHD1	ENSG00000165186.10	5.34369	0.65501	0.0136879	UP	ON	protein coding		DOWN	OFF	OFF
chr10:21661870..21661885,-	p1@ENST00000433460	RP11-275N1.1	ENSG00000230109.1	5.34344	0.621037	0.011022	UP	ON	linc
chr9:6645824..6645880,+	p1@ENST00000413145	RP11-390F4.6	ENSG00000236924.1	5.34149	1.54915	9.92549e-07	UP	ON	linc	UP	UP	ON	ON
chr2:183291515..183291569,-	p5@PDE1A	PDE1A		5.34045	0.665073	0.0379347	UP		protein coding
chr19:48902342..48902355,+	p@chr19:48902342..48902355,+	GRIN2D	NA	5.33917	2.34078	3.08692e-05	UP		protein coding gene body	UP	UP
chr17:41393865..41393870,+	p@chr17:41393865..41393870,+		NA	5.33687	3.0706	7.7402e-08	UP		linc	NA	NA	NA	NA
chr3:149051406..149051430,-	p2@TM4SF18	TM4SF18	ENSG00000163762.6	5.33043	0.653555	0.000838157	UP	ON	protein coding		DOWN		ON
chrX:55246809..55246816,+	p3@PAGE5	PAGE5	ENSG00000158639.12	5.32992	0.642248	0.0423105	UP		protein coding	UP	UP
chr13:100634031..100634045,+	p1@ZIC2	ZIC2	ENSG00000043355.10	5.32862	0.629573	0.000165084	UP	ON	protein coding	UP	UP	ON	ON
chr5:139422833..139422898,-	p1@NRG2	NRG2	ENSG00000158458.19	5.32767	0.644487	0.000493936	UP	ON	protein coding		DOWN	OFF	OFF
chr9:87284675..87284698,+	p1@NTRK2	NTRK2	ENSG00000148053.15	5.32604	1.5054	0.0116033	UP		protein coding	DOWN	UP
chr8:18942279..18942294,-	p11@PSD3	PSD3		5.32531	0.657417	0.0335765	UP		protein coding		UP
chr19:9121076..9121094,-	p@chr19:9121076..9121094,-		NA	5.32277	2.83284	0.00178401	UP		protein coding	NA	NA	NA	NA
chr5:175298487..175298498,+	p10@CPLX2	CPLX2	ENSG00000145920.14	5.32233	0.602619	0.0385211	UP		protein coding	UP	UP	OFF	OFF
chr1:149514253..149514258,-	p1@ENST00000391242	RNVU1-19	ENSG00000212544.1	5.32173	2.21004	8.15093e-05	UP	ON	small ncRNAs	NA	NA	NA	NA
chr5:103552623..103552625,+	p@chr5:103552623..103552625,+		NA	5.32078	0.644996	0.00205656	UP	ON	not annotated	NA	NA	NA	NA
chr2:188415691..188415712,-	p@chr2:188415691..188415712,-	TFPI	NA	5.3179	1.17159	0.00352504	UP	ON	protein coding gene body		DOWN
chrX:92951215..92951233,+	p@chrX:92951215..92951233,+	FAM133A	NA	5.31698	0.597828	0.0122407	UP	ON	protein coding gene body	UP	UP
chr16:55866997..55867041,-	p1@CES1	CES1	ENSG00000198848.12	5.31652	5.31995	0.0276396	UP		protein coding		UP
chr6:136172820..136172846,+	p2@PDE7B	PDE7B	ENSG00000171408.13	5.31564	1.9525	0.0016474	UP	ON	protein coding		DOWN
chr4:105416039..105416065,-	p1@CXXC4	CXXC4	ENSG00000168772.10	5.31439	2.0671	0.000108364	UP		protein coding	UP			OFF
chr3:147111198..147111225,+	p4@ZIC1	ZIC1	ENSG00000152977.9	5.31189	0.612146	0.0155321	UP	ON	protein coding	UP	UP		ON
chr6:23177224..23177279,-	p1@ENST00000420572		NA	5.31187	0.634614	0.0420098	UP		linc	NA	NA	NA	NA
chr6:56716686..56716731,-	p2@DST	DST	ENSG00000151914.18	5.31108	4.23059	4.92002e-06	UP		protein coding	DOWN
chr19:6590884..6590916,-	p3@CD70	CD70	ENSG00000125726.10	5.31048	1.16787	0.00149454	UP	ON	protein coding	UP	UP
chr14:24047965..24048079,-	p1@JPH4	JPH4		5.30983	0.429217	0.0497393	UP		protein coding	DOWN	DOWN
chr22:27053474..27053488,+	p5@MIAT	MIAT		5.30983	0.429217	0.049739	UP		linc	UP	UP
chr17:4544965..4544979,-	p1@ALOX15	ALOX15	ENSG00000161905.12	5.303	0.651491	0.0436125	UP		protein coding	DOWN		OFF	OFF
chr12:66036060..66036071,-	p4@ENST00000539653	RP11-230G5.2	ENSG00000250748.6	5.30269	0.670745	0.042098	UP		linc	NA	NA	NA	NA
chr7:73624327..73624350,+	p1@LAT2	LAT2	ENSG00000086730.16	5.29813	2.51113	4.82597e-06	UP		protein coding		DOWN
chr6:166581938..166581955,-	p3@T	T		5.29648	0.640895	0.0343924	UP		protein coding	UP	UP	ON	ON
chr19:58536952..58536958,-	p@chr19:58536952..58536958,-	VN2R19P	ENSG00000235974.1	5.29561	0.650532	0.0310624	UP		pseudogene			ON
chr14:29235961..29236008,+	p1@FOXG1	FOXG1	NA	5.29554	1.36143	0.0067467	UP		protein coding	UP	UP	ON	ON
chr5:27217822..27217828,+	p@chr5:27217822..27217828,+			5.2955	0.646784	0.0494178	UP		linc	NA	NA	NA	NA
chr19:42498345..42498356,-	p2@ATP1A3	ATP1A3		5.29252	0.465605	0.011755	UP	ON	protein coding	UP	UP
chr12:58026426..58026438,-	p3@B4GALNT1	B4GALNT1	ENSG00000135454.13	5.29236	0.595362	0.000174186	UP	ON	protein coding	UP	UP		ON
chr8:60031619..60031676,-	p1@TOX	TOX	ENSG00000198846.5	5.29141	1.50169	0.00128376	UP		protein coding		DOWN		ON
chrX:142722807..142722840,-	p4@SLITRK4	SLITRK4	ENSG00000179542.15	5.29096	0.631583	0.0426079	UP		protein coding		UP	OFF	OFF
chr5:14156865..14156901,+	p@chr5:14156865..14156901,+	TRIO	NA	5.29078	0.640838	0.00212229	UP	ON	protein coding gene body
chr11:28723970..28723983,+	p3@ENST00000513853	RP11-115J23.1	ENSG00000249867.5	5.29035	1.25704	0.00302442	UP	ON	linc	NA	NA	NA	NA
chr18:33766737..33766750,-	p@chr18:33766737..33766750,-	RP11-49I11.1		5.28892	0.612314	0.0347506	UP		antisense	NA	NA	NA	NA
chr19:42011981..42012002,+	p@chr19:42011981..42012002,+	AC005795.1	ENSG00000268034.1	5.28637	2.30532	0.000322625	UP		pseudogene			ON
chr5:58571500..58571517,-	p1@uc003jsd.1	PDE4D	ENSG00000113448.16	5.2851	0.622214	0.0134811	UP	ON	protein coding		DOWN
chr14:102197633..102197648,-	p1@ENST00000557778	RP11-1029J19.5	ENSG00000258404.1	5.28302	0.623332	0.00427391	UP	ON	linc	UP		ON	ON
chr1:189118891..189118896,+	p@chr1:189118891..189118896,+		NA	5.28205	1.2215	0.00148341	UP	ON	linc	NA	NA	NA	NA
chr14:88471509..88471522,+	p2@GPR65	GPR65		5.28184	0.632557	0.0352232	UP		protein coding	DOWN	DOWN
chr2:176970198..176970230,+	p@chr2:176970198..176970230,+	HOXD11		5.28152	0.656578	0.034827	UP		protein coding gene body	UP	UP	ON	ON
chr18:7117741..7117752,-	p3@LAMA1	LAMA1	ENSG00000101680.13	5.28068	0.603799	0.049217	UP		protein coding	UP	UP		ON
chr2:26915584..26915634,+	p1@KCNK3	KCNK3		5.28058	0.43673	0.0433258	UP		protein coding	DOWN	DOWN	ON
chr11:72983280..72983298,+	p2@P2RY6	P2RY6	ENSG00000171631.14	5.279	1.79903	0.00112294	UP	ON	protein coding	UP	UP
chr4:16362482..16362519,+	p@chr4:16362482..16362519,+		NA	5.27793	0.631049	0.045883	UP		lncrna	NA	NA	NA	NA
chr20:34195420..34195438,-	p1@FER1L4	FER1L4	ENSG00000088340.15	5.27576	1.14829	0.00206253	UP	ON	pseudogene	UP	UP	ON	ON
chr2:168149489..168149561,+	p1@ENST00000442316	AC074363.1	ENSG00000228222.1	5.27492	1.47541	0.000509233	UP	ON	linc
chr2:203043989..203044014,+	p1@ENST00000429685	PSMA2P3	ENSG00000227890.1	5.27233	2.17906	7.92292e-05	UP		pseudogene
chr8:57500935..57500955,+	p1@ENST00000464216	RP11-17A4.1	ENSG00000241431.1	5.27173	2.5672	0.000773391	UP		pseudogene		UP		ON
chr2:233385181..233385201,+	p6@PRSS56	PRSS56		5.27081	0.60203	0.0355937	UP		protein coding	NA	NA	NA	NA
chr4:73970050..73970089,+	p@chr4:73970050..73970089,+		NA	5.26907	1.12699	0.00596447	UP	ON	lncrna	NA	NA	NA	NA
chr2:10451839..10451928,+	p@chr2:10451839..10451928,+	HPCAL1	NA	5.26883	1.85267	1.30916e-07	UP	ON	protein coding gene body		DOWN
chr7:31938679..31938703,-	p@chr7:31938679..31938703,-	PDE1C	NA	5.26668	0.623167	0.0467256	UP		protein coding gene body	DOWN	DOWN		OFF
chr19:39989545..39989562,+	p2@DLL3	DLL3		5.2665	0.42733	0.0486089	UP		protein coding	UP	UP	ON	ON
chr12:132863007..132863039,-	p2@GALNT9	GALNT9	ENSG00000182870.8	5.26474	1.18533	0.00270209	UP	ON	protein coding		DOWN
chr2:29353207..29353220,-	p@chr2:29353207..29353220,-		NA	5.26462	2.42405	9.41312e-05	UP		lncrna	NA	NA	NA	NA
chr3:149051376..149051400,-	p1@TM4SF18	TM4SF18	ENSG00000163762.6	5.2614	0.978894	0.000343197	UP	ON	protein coding		DOWN		ON
chr7:36320649..36320687,+	p4@EEPD1	EEPD1	ENSG00000122547.10	5.25683	1.1237	0.000384994	UP	ON	protein coding
chr2:176969228..176969260,+	p1@HOXD11	HOXD11		5.25474	0.638983	0.0420106	UP		protein coding	UP	UP	ON	ON
chr10:101691084..101691100,-	p8@DNMBP	DNMBP	NA	5.25439	0.9262	0.00430031	UP	ON	protein coding
chrX:114252132..114252187,-	p1@IL13RA2	IL13RA2	ENSG00000123496.7	5.25338	3.24855	0.0043111	UP		protein coding		UP	OFF	OFF
chr2:176971685..176971700,+	p6@HOXD11	HOXD11	ENSG00000128713.12	5.25217	0.470423	0.0255848	UP	ON	protein coding	UP	UP	ON	ON
chr10:1895618..1895626,+	p@chr10:1895618..1895626,+			5.25213	0.62233	0.0359464	UP		linc	NA	NA	NA	NA
chr1:147245445..147245461,-	p2@GJA5	GJA5		5.25212	0.615722	0.0360475	UP		protein coding	DOWN	DOWN
chr20:26116667..26116670,+	p@chr20:26116667..26116670,+		NA	5.25155	0.583063	0.0436554	UP		linc	NA	NA	NA	NA
chr7:43733671..43733688,-	p@chr7:43733671..43733688,-	COA1	NA	5.25109	0.574634	0.0344948	UP		protein coding gene body	NA	NA	NA	NA
chr1:219980111..219980117,-	p@chr1:219980111..219980117,-	SLC30A10		5.25069	0.563845	0.0368542	UP		protein coding gene body	UP	UP	ON	ON
chr8:32579421..32579432,+	p26@NRG1	NRG1		5.25069	0.563845	0.0368542	UP		protein coding	DOWN
chrX:27417088..27417131,-	p1@ENST00000422048,p1@uc004dbt.2	RP11-268G12.1	ENSG00000228933.7	5.24949	1.60583	0.000114896	UP	ON	linc	NA	NA	NA	NA
chr1:566736..566770,+	p2@uc001aaz.2	hsa-mir-6723	ENSG00000237973.1	5.24925	1.17671	0.00608247	UP	ON	pseudogene
chr9:96717629..96717644,-	p1@BARX1	BARX1	ENSG00000131668.13	5.24884	0.428603	0.0317891	UP	ON	protein coding	UP	UP	ON	ON
chr4:186577832..186577907,-	p1@SORBS2	SORBS2		5.24646	1.36676	0.0264532	UP		protein coding		DOWN
chr10:114135060..114135085,+	p14@ACSL5	ACSL5	ENSG00000197142.10	5.24634	0.639409	0.0306421	UP		protein coding		DOWN
chr20:61273844..61273862,+	p1@SLCO4A1	SLCO4A1	ENSG00000101187.15	5.2451	4.44816	6.94773e-10	UP		protein coding
chr2:130076372..130076376,-	p@chr2:130076372..130076376,-		NA	5.24468	0.460792	0.0442851	UP		linc	NA	NA	NA	NA
chr15:50474412..50474438,+	p1@SLC27A2	SLC27A2	ENSG00000140284.10	5.24412	2.53332	2.50766e-10	UP	ON	protein coding	UP
chr10:70847852..70847873,+	p1@SRGN	SRGN	ENSG00000122862.4	5.24271	7.70804	0.00133477	UP		protein coding		DOWN
chr5:140514782..140514851,+	p1@PCDHB5	PCDHB5	ENSG00000113209.8	5.24196	2.91279	0.0103125	UP		protein coding
chr5:140739537..140739595,+	p1@PCDHGB2	PCDHGB2	ENSG00000253910.2	5.24137	2.10335	9.44564e-07	UP	ON	protein coding
chr7:151574505..151574628,+	p1@ENST00000467458	PRKAG2-AS1	ENSG00000239911.2	5.24005	1.57473	4.66816e-08	UP	ON	antisense
chr1:38259540..38259569,+	p3@MANEAL	MANEAL	ENSG00000185090.14	5.23714	0.582794	2.0176e-07	UP	ON	protein coding	UP	UP
chr10:5060113..5060122,-	p4@AKR1C2	AKR1C2	ENSG00000151632.16	5.23688	0.451791	0.0190114	UP	ON	protein coding	UP	UP	ON	ON
chr6:56558092..56558109,-	p5@DST	DST	ENSG00000151914.18	5.23475	2.47913	7.949e-06	UP		protein coding	DOWN
chr21:44839491..44839501,-	p@chr21:44839491..44839501,-	SIK1	NA	5.23094	0.594708	0.00765199	UP	ON	protein coding gene body
chr3:5740617..5740629,+	p@chr3:5740617..5740629,+		NA	5.23023	0.528748	0.0358361	UP	ON	linc	NA	NA	NA	NA
chr7:99573677..99573697,-	p1@AZGP1	AZGP1		5.2276	0.621838	0.0226255	UP	ON	protein coding	UP
chr9:18474204..18474215,+	p3@ADAMTSL1	ADAMTSL1	ENSG00000178031.15	5.22428	0.618269	0.0192947	UP	ON	protein coding			ON
chr7:100253993..100254078,-	p1@ACTL6B	ACTL6B		5.22423	0.682753	0.0365971	UP		protein coding	UP	UP		ON
chr12:26126668..26126674,+	p27@RASSF8	RASSF8		5.22334	0.623749	0.0365236	UP		protein coding	DOWN	DOWN
chr17:77743980..77744002,-	p@chr17:77743980..77744002,-		NA	5.22219	0.58165	0.0293393	UP		linc	NA	NA	NA	NA
chr18:63418785..63418796,+	p@chr18:63418785..63418796,+	CDH7		5.2218	0.388414	0.0365236	UP		protein coding gene body	UP	UP
chr11:83393303..83393342,-	p8@DLG2	DLG2		5.22177	0.598672	0.0368954	UP		protein coding
chr17:48638068..48638089,+	p1@CACNA1G	CACNA1G		5.22067	0.412449	0.023153	UP	ON	protein coding	UP			OFF
chr7:96634878..96634900,+	p2@DLX6	DLX6	ENSG00000006377.10	5.22005	0.528812	0.024028	UP	ON	protein coding	UP	UP	ON	ON
chr9:16063204..16063225,+	p@chr9:16063204..16063225,+		NA	5.21735	1.16277	0.00663718	UP	ON	linc	NA	NA	NA	NA
chr10:93976047..93976095,+	p1@NHP2P1	NHP2P1	ENSG00000105988.6	5.21692	0.538121	0.0163442	UP	ON	pseudogene			ON
chr10:69597810..69597827,-	p2@DNAJC12	DNAJC12	ENSG00000108176.14	5.21514	0.912489	0.000549323	UP	ON	protein coding	UP	UP	ON
chr3:12330560..12330579,+	p1@PPARG	PPARG	ENSG00000132170.19	5.2107	3.13968	1.28501e-05	UP		protein coding	DOWN	DOWN
chr1:45672027..45672050,-	p1@ZSWIM5	ZSWIM5	ENSG00000162415.6	5.20954	0.565952	4.14547e-06	UP	ON	protein coding			ON
chr6:49681276..49681307,-	p2@CRISP2	CRISP2		5.20923	0.598266	0.0377755	UP		protein coding		DOWN		OFF
chr6:30951487..30951504,+	p1@MUC21	MUC21	ENSG00000204544.5	5.20798	4.33205	0.032924	UP		protein coding	UP			OFF
chr13:84660871..84660895,+	p@chr13:84660871..84660895,+		NA	5.20781	0.545751	0.0039335	UP	ON	linc	NA	NA	NA	NA
chr4:75089803..75089822,+	p6@MTHFD2L	MTHFD2L	ENSG00000163738.18	5.2042	0.589946	0.0264532	UP	ON	protein coding
chr13:36429829..36429838,-	p10@DCLK1	DCLK1	ENSG00000133083.14	5.20399	0.541909	0.00748384	UP	ON	protein coding	UP
chr12:1613287..1613292,+	p@chr12:1613287..1613292,+		NA	5.20387	0.954389	0.000327091	UP	ON	linc	NA	NA	NA	NA
chrX:117957779..117957795,+	p1@ZCCHC12	ZCCHC12	ENSG00000174460.3	5.20088	1.56525	0.0442179	UP		protein coding				OFF
chr5:67586474..67586534,+	p2@PIK3R1	PIK3R1	ENSG00000145675.14	5.19925	0.550832	0.0147804	UP	ON	protein coding	DOWN
chr4:189030755..189030765,-	p1@TRIML2	TRIML2	ENSG00000179046.8	5.19913	0.998974	0.00499011	UP	ON	protein coding	UP	UP		ON
chrX:110039038..110039084,-	p1@CHRDL1	CHRDL1	ENSG00000101938.14	5.19771	1.25504	0.0149737	UP		protein coding	DOWN	DOWN
chr15:28834609..28834646,+	p1@HERC2P9	HERC2P9	ENSG00000206149.10	5.19649	0.517111	0.00574024	UP	ON	pseudogene	NA	NA	NA	NA
chr14:65346704..65346737,-	p2@SPTB	SPTB	ENSG00000070182.17	5.19441	1.57384	0.00199266	UP	ON	protein coding	UP	UP
chr5:140705778..140705844,+	p@chr5:140705778..140705844,+	AC005618.6	ENSG00000272070.1	5.19199	1.76619	3.05113e-06	UP	ON	linc			ON	ON
chr12:131438496..131438513,+	p2@GPR133	GPR133	ENSG00000111452.12	5.19069	2.68371	0.0447693	UP	OFF	protein coding	DOWN	DOWN
chr12:31910006..31910040,-	p@chr12:31910006..31910040,-		NA	5.18937	3.33212	0.000919485	UP		linc	NA	NA	NA	NA
chr5:170739239..170739274,+	p@chr5:170739239..170739274,+		NA	5.18716	0.593608	0.0252635	UP	ON	not annotated	NA	NA	NA	NA
chr12:131438443..131438461,+	p1@GPR133	GPR133	ENSG00000111452.12	5.18611	3.56409	0.0192796	UP		protein coding	DOWN	DOWN
chr3:114343826..114343869,-	p4@ZBTB20	ZBTB20	ENSG00000181722.15	5.18454	2.11968	3.66221e-05	UP	ON	protein coding
chr19:10688044..10688070,-	p@chr19:10688044..10688070,-	AP1M2	ENSG00000129354.11	5.18434	1.03598	0.00149128	UP	ON	protein coding			ON
chr7:23387403..23387438,-	p3@IGF2BP3	IGF2BP3	ENSG00000136231.13	5.18218	3.3532	4.06467e-06	UP		protein coding	UP	UP
chr7:12971296..12971310,+	p@chr7:12971296..12971310,+			5.17991	0.581976	0.0387636	UP		linc	NA	NA	NA	NA
chr19:49142301..49142354,-	p@chr19:49142301..49142354,-	CA11	ENSG00000063180.8	5.17825	1.38538	0.00167091	UP	ON	protein coding
chrX:110339367..110339429,+	p1@PAK3	PAK3	ENSG00000077264.14	5.1769	4.65057	0.000145729	UP		protein coding	UP		OFF	OFF
chr7:151433342..151433366,-	p5@PRKAG2	PRKAG2	ENSG00000106617.13	5.17615	1.47089	0.00227549	UP	ON	protein coding
chr5:59837974..59837990,-	p@chr5:59837974..59837990,-			5.17501	0.57268	0.0389027	UP		protein coding	NA	NA	NA	NA
chr3:13461807..13461857,-	p2@NUP210	NUP210	ENSG00000132182.11	5.17254	2.22049	1.39438e-07	UP	ON	protein coding	UP	UP
chr11:4665195..4665219,+	p1@OR51E1	OR51E1		5.17153	0.572246	0.0388759	UP		protein coding	UP	UP	ON	ON
chr12:71551604..71551613,-	p8@TSPAN8	TSPAN8		5.17119	0.361985	0.0385211	UP		protein coding	UP
chr2:154335268..154335286,-	p1@RPRM	RPRM	ENSG00000177519.3	5.16659	0.385514	0.03966	UP	ON	protein coding		UP	OFF
chr4:42659102..42659161,-	p1@ATP8A1	ATP8A1	ENSG00000124406.16	5.16611	2.14769	3.28115e-07	UP	ON	protein coding		DOWN
chr17:26697276..26697303,-	p2@SEBOX,p2@VTN	VTN	NA	5.16554	1.15505	0.0298574	UP		protein coding	UP			OFF
chr7:142510312..142510332,+	p@chr7:142510312..142510332,+			5.16502	0.573755	0.0387845	UP		linc	NA	NA	NA	NA
chr6:64151611..64151636,-	p@chr6:64151611..64151636,-		NA	5.16329	0.560988	0.00828517	UP	ON	linc	NA	NA	NA	NA
chr7:87230189..87230207,-	p1@ABCB1	ABCB1	ENSG00000085563.14	5.1619	2.33205	0.0117443	UP		protein coding	DOWN	DOWN
chr10:51371401..51371434,+	p1@TIMM23B	TIMM23B	ENSG00000204152.6	5.1615	0.508755	0.00791538	UP	ON	protein coding	NA	NA	NA	NA
chr3:154798096..154798115,+	p3@MME	MME	ENSG00000196549.10	5.16115	1.83845	0.00166482	UP		protein coding	DOWN	DOWN	ON	ON
chr5:59744512..59744531,-	p31@PDE4D	PDE4D		5.15908	0.563902	0.0399127	UP		protein coding		DOWN
chr1:145715572..145715599,-	p1@CD160	CD160		5.15828	0.512649	0.040745	UP		protein coding		DOWN
chr4:159131359..159131372,+	p11@TMEM144	TMEM144		5.15782	0.559812	0.0129832	UP	ON	protein coding
chr7:134212246..134212265,+	p3@AKR1B10	AKR1B10	ENSG00000198074.9	5.15733	1.01503	0.0179124	UP	ON	protein coding	UP	UP	ON	ON
chr12:100867653..100867677,+	p2@NR1H4	NR1H4		5.15578	0.563578	0.0398962	UP		protein coding	UP		OFF	OFF
chr18:56246825..56246890,-	p5@ALPK2	ALPK2	ENSG00000198796.6	5.15489	0.52416	0.00508512	UP	ON	protein coding	UP	UP	ON
chr5:10502761..10502785,-	p2@ENST00000515243	RP11-1C1.4	ENSG00000249396.1	5.15476	0.557351	0.0314498	UP		linc			ON	ON
chr4:19457034..19457063,+	p1@ENST00000511431	RP11-608O21.1	ENSG00000248515.1	5.1545	0.554578	0.0322779	UP		linc		UP	ON	ON
chr3:149051444..149051476,-	p4@TM4SF18	TM4SF18	ENSG00000163762.6	5.15428	0.569062	0.00281965	UP	ON	protein coding		DOWN		ON
chr19:6926399..6926424,+	p@chr19:6926399..6926424,+	EMR1	NA	5.15137	0.552824	0.00649987	UP	ON	protein coding gene body	DOWN	DOWN
chr3:98275107..98275141,-	p@chr3:98275107..98275141,-	CPOX	NA	5.14753	0.576152	0.023565	UP	ON	protein coding gene body	UP	UP
chr22:49768853..49768884,+	p@chr22:49768853..49768884,+		NA	5.14667	0.963113	0.00351432	UP	ON	linc	NA	NA	NA	NA
chr2:37571765..37571779,+	p3@QPCT	QPCT	ENSG00000115828.15	5.14481	2.37156	0.000591735	UP		protein coding	UP
chr3:157823517..157823562,-	p1@SHOX2	SHOX2	ENSG00000168779.19	5.14466	0.916421	0.000168738	UP	ON	protein coding	UP	UP	ON	ON
chr7:130875162..130875193,-	p@chr7:130875162..130875193,-			5.14455	0.562313	0.031591	UP		lncrna	NA	NA	NA	NA
chr14:31343729..31343745,+	p3@COCH	COCH	ENSG00000100473.15	5.14414	1.046	3.15251e-05	UP	ON	protein coding	UP	UP	ON
chr2:170550842..170550875,-	p2@C2orf77	CCDC173	ENSG00000154479.12	5.13919	0.917719	2.08851e-06	UP	ON	protein coding	NA	NA	NA	NA
chr7:98246588..98246604,+	p1@NPTX2	NPTX2	ENSG00000106236.3	5.13621	0.467928	0.0143958	UP	ON	protein coding	UP	UP
chr1:223101757..223101776,+	p3@DISP1	DISP1	ENSG00000154309.8	5.13557	0.531013	0.0470709	UP		protein coding		DOWN
chr5:114881383..114881387,+	p@chr5:114881383..114881387,+		NA	5.13491	0.562977	0.0384895	UP		not annotated	NA	NA	NA	NA
chr18:44790480..44790556,+	p@chr18:44790480..44790556,+		NA	5.1308	1.68211	0.0108132	UP		linc	NA	NA	NA	NA
chr7:24859952..24859970,-	p@chr7:24859952..24859970,-	OSBPL3	NA	5.13078	0.548068	0.0028051	UP	ON	protein coding gene body
chr5:58571807..58571821,-	p24@PDE4D	PDE4D	ENSG00000113448.16	5.12729	0.53257	0.0224852	UP	ON	protein coding		DOWN
chr19:4581767..4581807,-	p@chr19:4581767..4581807,-		NA	5.12669	1.87169	1.81809e-07	UP	ON	protein coding	NA	NA	NA	NA
chr5:178260112..178260119,+	p@chr5:178260112..178260119,+			5.12522	0.520453	0.0431516	UP		not annotated	NA	NA	NA	NA
chr10:81070781..81070843,+	p4@ZMIZ1	ZMIZ1	NA	5.12418	2.69924	0.000732729	UP		protein coding gene body
chr8:121823505..121823566,+	p1@AK302130		NA	5.12324	1.28956	0.000917067	UP	ON	not annotated	NA	NA	NA	NA
chr3:185960400..185960473,-	p2@DGKG	DGKG	ENSG00000058866.14	5.12133	3.00024	5.76166e-09	UP		protein coding				ON
chr11:123325159..123325173,+	p3@ENST00000525757,p3@uc001pyv.1	LINC01059	ENSG00000023171.14	5.12112	0.538434	0.00360303	UP	ON	linc	NA	NA	NA	NA
chr13:19479391..19479398,-	p@chr13:19479391..19479398,-			5.11941	0.54878	0.0408019	UP		not annotated	NA	NA	NA	NA
chr5:673147..673178,+	p@chr5:673147..673178,+		NA	5.11899	0.515071	1.81819e-05	UP	ON	not annotated	NA	NA	NA	NA
chrX:19140575..19140622,-	p1@GPR64	GPR64	ENSG00000173698.17	5.11865	1.27269	0.00626899	UP		protein coding			ON
chr4:115519577..115519631,+	p2@UGT8	UGT8	ENSG00000174607.10	5.11559	1.2283	6.81488e-08	UP	ON	protein coding	UP	UP
chr6:23228836..23228864,+	p@chr6:23228836..23228864,+		NA	5.1144	0.466779	0.00539198	UP	ON	linc	NA	NA	NA	NA
chr13:100634004..100634025,+	p2@ZIC2	ZIC2	ENSG00000043355.10	5.11366	0.514038	1.35368e-05	UP	ON	protein coding	UP	UP	ON	ON
chr10:114135004..114135033,+	p6@ACSL5	ACSL5	ENSG00000197142.10	5.11097	1.17155	0.00539563	UP		protein coding		DOWN
chr19:42212501..42212521,+	p2@CEACAM5	CEACAM5	ENSG00000105388.15	5.11095	2.25389	0.00592162	UP		protein coding	UP	UP		ON
chr1:233791439..233791444,+	p7@KCNK1	KCNK1	ENSG00000135750.14	5.11015	0.503445	0.0312985	UP		protein coding	UP	UP
chr15:79290919..79290969,+	p@chr15:79290919..79290969,+			5.10976	0.486341	0.0430142	UP		lncrna	NA	NA	NA	NA
chr20:26116339..26116381,-	p@chr20:26116339..26116381,-		NA	5.10973	0.458793	0.0261486	UP	ON	other	NA	NA	NA	NA
chr6:136847697..136847750,-	p2@MAP7	MAP7	ENSG00000135525.18	5.10892	0.534394	0.0209666	UP	ON	protein coding		UP
chr8:32579321..32579340,+	p10@NRG1	NRG1	ENSG00000157168.14	5.10509	0.49411	0.0430133	UP		protein coding	DOWN
chr6:170475650..170475682,-	p@chr6:170475650..170475682,-		NA	5.1045	0.489825	0.0209526	UP	ON	linc	NA	NA	NA	NA
chr3:70048881..70048888,+	p1@ENST00000483525,p1@uc003dog.2	RP11-460N16.1	ENSG00000240405.5	5.10446	0.541677	0.0204163	UP	ON	linc	NA	NA	NA	NA
chr3:195076891..195076916,-	p@chr3:195076891..195076916,-	ACAP2		5.10324	0.547513	0.0418142	UP		protein coding		UP
chr16:28996398..28996413,+	p4@LAT	LAT	ENSG00000213658.10	5.10219	0.546073	0.0161292	UP	ON	protein coding
chr19:51472031..51472042,-	p6@KLK6	KLK6	ENSG00000167755.13	5.10209	1.45537	0.0078982	UP		protein coding	UP	UP	ON	ON
chr4:3768100..3768123,+	p2@ADRA2C	ADRA2C	ENSG00000184160.7	5.10181	0.485713	0.00894087	UP	ON	protein coding
chr11:7626993..7627017,+	p9@PPFIBP2	PPFIBP2	ENSG00000166387.11	5.10006	0.522341	0.04931	UP		protein coding
chr21:44582378..44582401,-	p1@LOC100288336	AP001631.10		5.09946	0.507088	0.0238767	UP	ON	protein coding	NA	NA	NA	NA
chr19:16045510..16045553,-	p8@CYP4F11	CYP4F11	ENSG00000171903.16	5.09888	0.478528	0.0133265	UP	ON	protein coding	UP	UP
chr7:47009249..47009265,+	p1@ENST00000445615	AC004870.4	ENSG00000223829.5	5.09809	0.521878	0.000899434	UP	ON	lncrna	NA	NA	NA	NA
chr12:118406777..118406811,-	p1@KSR2	KSR2	ENSG00000171435.13	5.09508	0.482916	0.000143547	UP	ON	protein coding				OFF
chr1:234565260..234565271,-	p@chr1:234565260..234565271,-	TARBP1		5.09435	0.90523	0.0262297	UP		protein coding gene body		UP
chr7:92463153..92463169,-	p8@CDK6	CDK6	ENSG00000105810.9	5.09299	0.538335	0.00102418	UP	ON	protein coding		UP
chr6:32557564..32557604,-	p1@HLA-DRB1,p2@HLA-DRB5	HLA-DRB1	ENSG00000196126.10	5.09204	1.11102	0.00650356	UP	ON	protein coding		DOWN
chr2:100938666..100938682,-	p@chr2:100938666..100938682,-	LONRF2	NA	5.09149	0.893433	0.000126174	UP	ON	protein coding
chr13:110354471..110354477,-	p@chr13:110354471..110354477,-			5.08064	0.319874	0.0388143	UP		not annotated	NA	NA	NA	NA
chr1:158494002..158494016,+	p@chr1:158494002..158494016,+	RP11-144L1.8	NA	5.08044	0.454356	0.0147853	UP	ON	pseudogene	NA	NA	NA	NA
chr1:8251750..8251759,+	p@chr1:8251750..8251759,+	RP11-431K24.2		5.07607	0.550829	0.0426044	UP		pseudogene	NA	NA	NA	NA
chr22:26565421..26565434,+	p1@SEZ6L	SEZ6L		5.07598	0.494711	0.0437083	UP		protein coding	UP	UP		OFF
chr2:113483700..113483732,+	p1@NT5DC4	NT5DC4	ENSG00000144130.11	5.07591	0.944138	0.00388386	UP	ON	protein coding	NA	NA	NA	NA
chr12:56915776..56915787,+	p3@RBMS2	RBMS2	ENSG00000076067.11	5.07568	0.463633	0.0410063	UP		protein coding	DOWN	DOWN
chr22:36018569..36018583,-	p2@MB	MB	ENSG00000198125.12	5.0733	1.62692	0.0115961	UP		protein coding	UP	UP
chr19:18380857..18380862,-	p1@KIAA1683	KIAA1683	NA	5.0717	0.959654	3.9313e-07	UP	ON	protein coding gene body	DOWN	DOWN	ON
chr17:35294075..35294102,+	p7@LHX1	LHX1	ENSG00000273706.4	5.06956	1.43864	0.00607213	UP		protein coding	UP	UP	ON	ON
chr8:70746335..70746374,+	p1@ENST00000501104,p1@ENST00000528800	RP11-159H10.3	ENSG00000246528.3	5.06797	0.893526	0.00137658	UP	ON	antisense	UP		ON	ON
chr12:111126910..111126949,-	p1@HVCN1	HVCN1	ENSG00000122986.13	5.06797	2.69942	0.010465	UP		protein coding		DOWN
chr20:17207711..17207722,+	p3@PCSK2	PCSK2	ENSG00000125851.9	5.06611	0.382559	0.0321361	UP		protein coding	UP		OFF	OFF
chr6:56765635..56765674,-	p@chr6:56765635..56765674,-	DST		5.06412	0.5444	0.0425795	UP		protein coding gene body	DOWN
chr1:156631224..156631248,-	p1@ENST00000448869	RP11-284F21.7	ENSG00000229953.1	5.06266	5.17454	1.10107e-15	UP		antisense	UP	UP	ON	ON
chr16:12995468..12995497,+	p1@SHISA9	SHISA9	ENSG00000237515.7	5.06244	0.904105	0.0234779	UP	ON	protein coding	UP	UP
chr14:100485771..100485833,+	p4@EVL	EVL	ENSG00000196405.12	5.06159	0.49388	0.0356886	UP		protein coding
chr8:146220249..146220272,+	p1@TMED10P1	TMED10P1	ENSG00000254618.1	5.06095	0.788089	0.00684695	UP	ON	pseudogene
chr12:51985001..51985037,+	p1@SCN8A	SCN8A	ENSG00000196876.9	5.05968	0.480042	0.000291012	UP	ON	protein coding	UP	UP
chr6:33644021..33644058,+	p@chr6:33644021..33644058,+	ITPR3		5.05963	0.50998	0.0432021	UP		protein coding gene body
chr5:156486120..156486134,-	p1@HAVCR1	HAVCR1		5.05754	0.510343	0.0431667	UP		protein coding	UP	UP	ON
chr2:223916899..223916915,+	p1@KCNE4	KCNE4	ENSG00000152049.6	5.05712	4.05703	0.0377466	UP		protein coding	UP
chr5:140201183..140201218,+	p1@PCDHA5	PCDHA5	ENSG00000204965.8	5.05672	0.408961	0.0164361	UP	ON	protein coding	UP			OFF
chr1:202129704..202129762,-	p1@PTPN7	PTPN7		5.05655	1.4278	0.0420753	UP		protein coding
chr18:63418241..63418256,+	p1@CDH7	CDH7	ENSG00000081138.13	5.0559	0.332791	0.0352635	UP		protein coding	UP	UP
chr13:22245205..22245220,+	p1@FGF9	FGF9	ENSG00000102678.6	5.05526	0.476545	0.00127248	UP	ON	protein coding		DOWN	OFF	OFF
chr20:35235394..35235409,+	p@chr20:35235394..35235409,+	TGIF2-C20orf24	NA	5.05362	0.882435	0.000426247	UP	ON	protein coding gene body	NA	NA	NA	NA
chr14:27067039..27067060,-	p6@NOVA1	NOVA1	ENSG00000139910.19	5.05298	0.489053	0.000101965	UP	ON	protein coding	UP			OFF
chr2:46300960..46301034,+	p3@PRKCE	PRKCE	ENSG00000171132.13	5.05264	1.80592	0.000268689	UP	ON	protein coding	DOWN	DOWN
chr22:48027545..48027576,+	p3@uc003bij.2,p3@uc003bik.1	RP11-191L9.4	ENSG00000224271.5	5.0498	0.465441	0.00281853	UP	ON	linc	NA	NA	NA	NA
chr13:25338297..25338335,+	p1@RNF17	RNF17		5.0489	0.476792	0.0451229	UP		protein coding		UP		ON
chr21:29765694..29765738,-	p@chr21:29765694..29765738,-		NA	5.04781	0.523385	0.00999435	UP	ON	linc	NA	NA	NA	NA
chr21:32931393..32931408,-	p4@TIAM1	TIAM1	ENSG00000156299.12	5.04769	0.474965	3.33927e-05	UP	ON	protein coding
chr1:39670336..39670355,+	p10@MACF1	MACF1	ENSG00000127603.23	5.04725	0.510701	0.0215061	UP	ON	protein coding		DOWN
chr4:47840071..47840094,-	p1@CORIN	CORIN		5.0468	0.453932	0.0330959	UP		protein coding		DOWN
chr6:55443831..55443908,-	p1@HMGCLL1	HMGCLL1	ENSG00000146151.12	5.04599	0.336483	0.0257671	UP	ON	protein coding	DOWN	DOWN	OFF	OFF
chrX:134975521..134975551,-	p1@CT45A5		NA	5.04361	0.462853	0.0170427	UP	ON	protein coding	NA	NA	NA	NA
chr17:38261177..38261211,-	p@chr17:38261177..38261211,-			5.04237	0.500776	0.0444604	UP		not annotated	NA	NA	NA	NA
chr2:70995307..70995339,-	p1@ADD2	ADD2	ENSG00000075340.22	5.04216	2.83523	0.000353871	UP		protein coding		UP
chr3:33260373..33260422,-	p2@SUSD5	SUSD5	ENSG00000173705.8	5.03998	0.502752	0.00543461	UP	ON	protein coding				ON
chr5:75699040..75699090,+	p3@IQGAP2	IQGAP2	ENSG00000145703.15	5.03918	0.468825	0.0162444	UP	ON	protein coding		DOWN
chr6:145243445..145243456,+	p@chr6:145243445..145243456,+		NA	5.03894	0.442594	0.0371982	UP	ON	linc	NA	NA	NA	NA
chr14:32887588..32887603,+	p@chr14:32887588..32887603,+	AKAP6	NA	5.03778	0.507864	0.0191226	UP	ON	protein coding gene body		DOWN
chr8:94870010..94870025,+	p13@PDP1	PDP1	ENSG00000164951.15	5.03769	0.459668	0.0322991	UP	ON	protein coding		UP
chr22:30960879..30960895,-	p1@GAL3ST1	GAL3ST1	ENSG00000128242.12	5.03714	0.487754	0.0337932	UP		protein coding	UP	DOWN		OFF
chr17:46703942..46703964,-	p4@HOXB9	HOXB9	ENSG00000170689.9	5.03527	0.851522	0.000113456	UP	ON	protein coding	UP	UP	ON	ON
chr19:49631781..49631818,+	p3@PPFIA3	PPFIA3	ENSG00000177380.13	5.03472	1.25996	2.47333e-05	UP	ON	protein coding	UP	UP
chr15:34447023..34447038,-	p3@C15orf29	KATNBL1	ENSG00000134152.10	5.03455	1.22514	0.00723984	UP		protein coding	NA	NA	NA	NA
chr17:63533962..63533988,-	p@chr17:63533962..63533988,-	AXIN2		5.03378	0.445943	0.0457308	UP		protein coding gene body		DOWN
chr17:10195132..10195137,+	p@chr17:10195132..10195137,+	RP11-401O9.4		5.03323	0.519948	0.0439687	UP		antisense	NA	NA	NA	NA
chr20:62128967..62129009,+	p@chr20:62128967..62129009,+		NA	5.03236	0.473973	0.000162286	UP	ON	not annotated	NA	NA	NA	NA
chr17:43697693..43697718,+	p3@CRHR1	CRHR1-IT1	ENSG00000204650.13	5.03127	0.444996	0.0138543	UP	ON	pseudogene	NA	NA	NA	NA
chr19:33191049..33191054,-	p@chr19:33191049..33191054,-			5.02689	0.465158	0.0464667	UP		lncrna	NA	NA	NA	NA
chr1:207996034..207996054,-	p2@C1orf132	C1orf132	ENSG00000203709.9	5.02633	0.43948	0.00147075	UP	ON	lncrna	NA	NA	NA	NA
chr7:68735026..68735050,+	p@chr7:68735026..68735050,+			5.02489	0.491508	0.0457756	UP		linc	NA	NA	NA	NA
chr1:188856517..188856523,-	p1@ENST00000414765	RP11-316I3.2		5.02489	0.491508	0.0457756	UP		linc	NA	NA	NA	NA
chr8:55471706..55471714,+	p3@RP1	RP11-53M11.3		5.02436	0.518556	0.0443076	UP		linc	NA	NA	NA	NA
chr10:52645379..52645393,-	p1@A1CF	A1CF		5.02324	0.492113	0.0457308	UP		protein coding	UP	UP	ON
chr18:63417762..63417774,+	p2@CDH7	CDH7	ENSG00000081138.13	5.02172	0.301057	0.0380896	UP		protein coding	UP	UP
chr17:81006437..81006497,-	p2@B3GNTL1	B3GNTL1	ENSG00000175711.8	5.02126	1.31096	2.02863e-05	UP	ON	protein coding	UP
chr1:246887738..246887749,+	p7@SCCPDH	SCCPDH		5.01802	0.867696	0.00800864	UP	ON	protein coding
chr9:116226039..116226056,+	p11@RGS3	RGS3	ENSG00000138835.22	5.01653	0.933555	0.000408381	UP	ON	protein coding		DOWN
chr1:154540261..154540288,+	p2@CHRNB2	CHRNB2		5.01639	0.290869	0.0316485	UP		protein coding	UP	UP
chr2:176981526..176981543,+	p3@HOXD10	HOXD10	ENSG00000128710.5	5.01557	0.35753	0.034214	UP		protein coding		UP		ON
chr6:26167298..26167303,+	p@chr6:26167298..26167303,+	HIST1H2BD	NA	5.01478	0.471056	0.000209577	UP	ON	protein coding gene body	UP	UP
chr16:29888787..29888817,-	p@chr16:29888787..29888817,-	SEZ6L2	NA	5.01456	0.436648	0.0154364	UP	ON	protein coding gene body	UP
chr20:50179368..50179392,-	p2@NFATC2	NFATC2	ENSG00000101096.19	5.01108	1.32703	0.000649671	UP	ON	protein coding		DOWN
chr15:45344875..45344879,+	p@chr15:45344875..45344879,+	SORD	NA	5.00821	0.484858	0.0299367	UP	ON	protein coding gene body	UP	UP
chr11:104005546..104005596,-	p@chr11:104005546..104005596,-	PDGFD		5.00753	0.432218	0.0470664	UP		protein coding gene body
chr14:106916169..106916203,+	p@chr14:106916169..106916203,+		NA	5.00749	0.458729	0.0192577	UP	ON	not annotated	NA	NA	NA	NA
chr7:101917407..101917443,+	p3@CUX1	CUX1	ENSG00000257923.9	5.00737	2.35413	0.000183921	UP		protein coding
chr22:22901414..22901437,-	p3@PRAME	PRAME	ENSG00000185686.17	5.00637	0.466804	0.00282916	UP	ON	protein coding	UP	UP	ON	ON
chr14:31343703..31343726,+	p2@COCH	COCH	ENSG00000100473.15	5.00625	1.15008	7.70135e-06	UP	ON	protein coding	UP	UP	ON
chr14:65233114..65233131,-	p@chr14:65233114..65233131,-	SPTB	NA	5.00422	0.450175	0.00667934	UP	ON	protein coding gene body	UP	UP
chr19:47975143..47975184,-	p1@SLC8A2	SLC8A2	ENSG00000118160.13	5.00293	0.280912	0.0447894	UP		protein coding	UP	UP
chr7:48211048..48211063,+	p1@ABCA13	ABCA13	ENSG00000179869.14	5.00288	3.02908	0.0138588	UP		protein coding		UP		ON
chr5:891522..891556,+	p@chr5:891522..891556,+		NA	5.00199	0.449297	0.000419952	UP	ON	not annotated	NA	NA	NA	NA
chr13:24528328..24528353,-	p@chr13:24528328..24528353,-		NA	5.00141	0.426709	0.0278055	UP	ON	pseudogene	NA	NA	NA	NA
chr20:61298021..61298038,-	p1@ENST00000411824	RP11-93B14.5	ENSG00000232803.1	5.00097	0.481524	0.0417227	UP		antisense	UP
chr12:54410639..54410659,+	p2@HOXC4,p2@HOXC5,p2@HOXC6	HOXC4	ENSG00000198353.7	4.99772	0.45123	0.000421122	UP	ON	protein coding	UP	UP
chr9:123165778..123165799,-	p8@CDK5RAP2	CDK5RAP2	ENSG00000136861.17	4.99611	0.861367	0.00656911	UP	ON	protein coding
chr6:136173008..136173013,+	p1@PDE7B	PDE7B	ENSG00000171408.13	4.99255	1.57584	0.00298632	UP	ON	protein coding		DOWN
chr17:21516158..21516165,+	p@chr17:21516158..21516165,+			4.99019	0.479767	0.0470436	UP		pseudogene	NA	NA	NA	NA
chr18:5466317..5466374,-	p@chr18:5466317..5466374,-	EPB41L3		4.98929	0.472775	0.0472368	UP		protein coding		DOWN
chr10:1779683..1779697,-	p11@ADARB2	ADARB2	ENSG00000185736.15	4.98928	0.435916	0.0477091	UP		protein coding			OFF	OFF
chr7:107883640..107883652,-	p21@NRCAM	NRCAM		4.9881	0.473627	0.0472016	UP		protein coding		UP
chr3:179754706..179754732,-	p4@PEX5L	PEX5L		4.9872	0.279863	0.0406867	UP		protein coding	UP	UP
chr3:89156763..89156797,+	p1@EPHA3	EPHA3	ENSG00000044524.10	4.98527	1.46081	0.00277932	UP		protein coding
chr4:176923558..176923591,-	p4@GPM6A	GPM6A	ENSG00000150625.16	4.98368	0.316783	0.0265913	UP	ON	protein coding	DOWN	DOWN	OFF	OFF
chr4:100273894..100273908,-	p1@ADH1C	ADH1C	ENSG00000248144.5	4.9831	0.481133	0.0075638	UP	ON	other	UP	UP	OFF	OFF
chr11:31832687..31832704,-	p6@PAX6	PAX6	ENSG00000007372.20	4.98207	0.420339	0.00147328	UP	ON	protein coding	DOWN	UP
chr1:114430113..114430124,-	p4@BCL2L15	BCL2L15		4.9808	0.418359	0.0484469	UP		protein coding	UP		ON
chr5:57878932..57878947,+	p3@RAB3C	RAB3C	ENSG00000152932.7	4.9768	0.438012	0.0354685	UP		protein coding	UP			OFF
chr20:62285126..62285157,-	p4@STMN3	STMN3	ENSG00000197457.9	4.97627	0.446396	0.000656537	UP	ON	protein coding	UP
chr20:10199468..10199516,+	p1@SNAP25	SNAP25	ENSG00000132639.12	4.9762	3.09721	0.010751	UP		protein coding	UP
chrX:141293047..141293082,-	p1@MAGEC2	MAGEC2		4.97319	0.47088	0.0471103	UP		protein coding	UP	UP	ON	ON
chr17:73606737..73606763,+	p6@MYO15B	MYO15B		4.97185	0.464397	0.0329528	UP		protein coding
chr11:32113490..32113494,+	p@chr11:32113490..32113494,+	RCN1	ENSG00000049449.8	4.97132	1.15986	0.000555112	UP	ON	protein coding
chr2:149632783..149632820,+	p1@KIF5C	KIF5C	ENSG00000168280.12	4.96747	2.25926	0.00324569	UP		protein coding	UP	UP
chr11:123325192..123325210,+	p2@ENST00000525757,p2@uc001pyv.1	LINC01059	ENSG00000023171.14	4.96715	0.456335	0.00853087	UP	ON	linc	NA	NA	NA	NA
chr7:27224842..27224872,-	p1@HOXA11	HOXA11	ENSG00000005073.5	4.96485	0.441054	0.0219804	UP	ON	protein coding	UP	UP		ON
chr8:19930258..19930259,-	p@chr8:19930258..19930259,-		NA	4.96419	0.435243	0.0444318	UP		not annotated	NA	NA	NA	NA
chr9:102584278..102584285,+	p5@NR4A3	NR4A3	ENSG00000119508.17	4.96327	0.444927	0.000371725	UP	ON	protein coding	DOWN	DOWN
chr19:46580848..46580895,-	p1@ENST00000366172,p1@uc002pdz.1	IGFL4	ENSG00000204869.8	4.96285	0.454234	0.00274819	UP	ON	protein coding	UP	UP	ON	ON
chr10:101691101..101691115,-	p7@DNMBP	DNMBP	NA	4.96131	1.06851	0.00244639	UP		protein coding
chr16:67198633..67198671,+	p1@HSF4	HSF4	ENSG00000102878.16	4.95968	1.29207	0.00276583	UP		protein coding	UP	UP
chr3:93783330..93783364,+	p3@NSUN3	NSUN3	NA	4.95766	0.738232	0.00682046	UP	ON	protein coding gene body
chr7:155754634..155754648,-	p@chr7:155754634..155754648,-		NA	4.95723	0.454502	0.00301866	UP	ON	linc	NA	NA	NA	NA
chr6:25652432..25652485,+	p1@SCGN	SCGN		4.95324	0.254907	0.0454347	UP		protein coding		UP	OFF	OFF
chr5:59829739..59829760,+	p@chr5:59829739..59829760,+	PART1		4.95278	0.453774	0.0486634	UP		linc	UP	UP
chr20:42647752..42647774,-	p@chr20:42647752..42647774,-			4.95278	0.453774	0.0486634	UP		not annotated	NA	NA	NA	NA
chr17:74236512..74236556,-	p2@RNF157	RNF157	ENSG00000141576.14	4.95228	0.36401	0.00260096	UP	ON	protein coding	UP
chr4:159131596..159131623,+	p3@TMEM144	TMEM144	ENSG00000164124.10	4.95214	1.32295	0.00196749	UP		protein coding
chr8:102381085..102381119,+	p1@NACAP1	NACAP1	ENSG00000228224.3	4.9508	2.33752	6.12849e-06	UP		pseudogene
chr5:45696428..45696488,-	p1@HCN1	HCN1	ENSG00000164588.5	4.94921	0.458944	0.0439664	UP		protein coding	UP
chr7:32110451..32110523,-	p1@PDE1C	PDE1C	ENSG00000154678.16	4.94583	0.92659	0.0212057	UP		protein coding	DOWN	DOWN		OFF
chr6:46097525..46097564,-	p1@ENST00000437249	RP1-8B1.4	ENSG00000231769.2	4.9427	0.42932	0.000343197	UP	ON	antisense		DOWN		OFF
chr5:134263568..134263573,+	p3@MIR4461	MIR4461	ENSG00000263963.1	4.9412	0.430651	0.0227477	UP	ON	small ncRNAs	NA	NA
chr6:22113567..22113578,+	p@chr6:22113567..22113578,+	CASC15	NA	4.94021	0.445149	0.0475342	UP		linc	NA	NA	NA	NA
chr5:12574944..12574973,+	p1@TAG	CT49	ENSG00000248131.5	4.93576	0.421912	0.026868	UP	ON	linc	NA	NA	NA	NA
chr12:120662701..120662711,-	p58@PXN	PXN		4.93509	0.468488	0.0495649	UP		protein coding
chr4:63376074..63376080,+	p1@HMGN1P11	HMGN1P11	ENSG00000248336.1	4.93407	0.41716	0.00495589	UP	ON	pseudogene
chr1:18085848..18085860,+	p@chr1:18085848..18085860,+	ACTL8		4.93202	0.456411	0.0380408	UP		protein coding gene body	UP	UP	ON	ON
chr10:26727647..26727722,+	p2@APBB1IP	APBB1IP	ENSG00000077420.15	4.93143	1.03986	0.0412967	UP		protein coding		DOWN
chr8:23712312..23712328,-	p1@STC1	STC1	ENSG00000159167.11	4.92955	6.38045	0.000567028	UP		protein coding
chr12:45270077..45270143,-	p1@NELL2	NELL2	ENSG00000184613.10	4.92835	1.87353	0.00262142	UP		protein coding	DOWN	UP
chr13:113719164..113719184,+	p@chr13:113719164..113719184,+	MCF2L		4.92703	0.44843	0.0232717	UP	ON	protein coding
chr8:26371695..26371745,+	p7@DPYSL2	DPYSL2	ENSG00000092964.16	4.92665	2.42731	3.38472e-06	UP		protein coding	DOWN	DOWN
chr17:43971904..43971945,+	p1@MAPT	MAPT	ENSG00000186868.15	4.92624	2.50945	1.05048e-06	UP		protein coding				ON
chr2:230450887..230450899,-	p@chr2:230450887..230450899,-	DNER	NA	4.9259	0.446132	0.0309666	UP		protein coding gene body	UP
chr2:115918980..115919005,+	p5@DPP10	DPP10	ENSG00000175497.16	4.92569	0.405176	0.0152212	UP	ON	protein coding	UP	UP	OFF	OFF
chr5:93953985..93954006,+	p6@ANKRD32	ANKRD32	ENSG00000133302.12	4.925	0.450875	0.0128271	UP	ON	protein coding	UP
chr3:113616338..113616364,+	p2@GRAMD1C	GRAMD1C	ENSG00000178075.19	4.92483	1.50307	0.000327376	UP		protein coding
chr12:41221975..41221996,+	p2@CNTN1	CNTN1		4.92456	0.248623	0.0434185	UP		protein coding		UP	OFF
chr5:179720177..179720223,+	p1@ENST00000504573	CTB-129O4.1	ENSG00000248367.1	4.92353	1.3357	0.001719	UP	ON	antisense	UP		ON	ON
chr2:233320827..233320853,+	p2@ALPI	ALPI	ENSG00000163295.4	4.92335	0.416382	0.0307691	UP		protein coding	UP	UP	ON	ON
chr4:41540251..41540269,+	p11@LIMCH1	LIMCH1	ENSG00000064042.17	4.92299	0.445272	0.0498097	UP		protein coding	DOWN	DOWN
chr17:63534783..63534784,-	p@chr17:63534783..63534784,-	AXIN2		4.91976	0.688902	0.0104451	UP	ON	protein coding gene body		DOWN
chr12:58026920..58026993,-	p1@B4GALNT1	B4GALNT1	ENSG00000135454.13	4.91891	3.51936	8.67256e-08	UP		protein coding	UP	UP		ON
chr4:75089754..75089790,+	p2@MTHFD2L	MTHFD2L	ENSG00000163738.18	4.91862	0.438816	0.0391486	UP	ON	protein coding
chr2:36796813..36796868,-	p@chr2:36796813..36796868,-	FEZ2	NA	4.9169	1.55382	0.00136448	UP	ON	protein coding gene body
chr12:20910262..20910266,-	p@chr12:20910262..20910266,-		NA	4.91559	0.401933	0.0119462	UP	ON	not annotated	NA	NA	NA	NA
chr13:46786138..46786153,+	p2@LRRC63	LRRC63		4.91555	0.433994	0.0355602	UP		protein coding	NA	NA	NA	NA
chr3:149051346..149051364,-	p3@TM4SF18	TM4SF18	ENSG00000163762.6	4.91434	0.419901	0.00190039	UP	ON	protein coding		DOWN		ON
chr3:36555727..36555729,+	p@chr3:36555727..36555729,+	STAC	NA	4.9141	0.406115	0.000605874	UP	ON	protein coding gene body	DOWN	DOWN	ON
chr6:141219511..141219524,-	p@chr6:141219511..141219524,-		NA	4.91297	0.422055	0.00211485	UP	ON	linc	NA	NA	NA	NA
chr5:172662197..172662216,-	p1@NKX2-5	NKX2-5	ENSG00000183072.9	4.91168	0.759583	0.000662248	UP	ON	protein coding	UP	UP	ON	ON
chr7:27153226..27153257,+	p2@ENST00000522193	HOXA-AS2	ENSG00000253552.7	4.91038	1.65409	0.00314383	UP	ON	antisense	NA	NA	NA	NA
chr15:33359020..33359043,-	p1@AK127078	FMN1	NA	4.90928	0.415596	0.00184496	UP	ON	protein coding gene body		DOWN	ON
chr8:23702263..23702282,-	p@chr8:23702263..23702282,-	STC1	NA	4.90883	1.28257	0.00218259	UP	ON	protein coding gene body
chr5:140582207..140582209,+	p@chr5:140582207..140582209,+	PCDHB11	NA	4.90855	0.416965	0.0035368	UP	ON	protein coding gene body		UP	ON
chr4:156775880..156775895,+	p3@TDO2	TDO2	ENSG00000151790.8	4.90833	0.759627	0.000295425	UP	ON	protein coding	UP			ON
chr4:152020789..152020800,+	p3@RPS3A	RPS3A	ENSG00000145425.9	4.90593	0.818091	0.00649368	UP	ON	protein coding
chr3:128206762..128206781,-	p2@GATA2	GATA2	ENSG00000179348.11	4.90496	3.72959	1.42022e-05	UP		protein coding	DOWN	DOWN
chrX:118466905..118466911,+	p@chrX:118466905..118466911,+	RP5-1139I1.1	NA	4.90467	1.24015	0.0109572	UP		linc	NA	NA	NA	NA
chr11:122027055..122027093,-	p@chr11:122027055..122027093,-	RP11-820L6.1	NA	4.90449	0.428471	0.0118805	UP	ON	lncrna	NA	NA	NA	NA
chr6:147981838..147981849,+	p1@ENST00000427015	RP11-307P5.1	ENSG00000227681.5	4.9043	0.377352	0.0372043	UP		linc	NA	NA	NA	NA
chr11:64976781..64976793,+	p25@CAPN1	CAPN1	ENSG00000014216.15	4.90342	1.29288	0.00625043	UP		protein coding
chr7:23387355..23387366,-	p8@IGF2BP3	IGF2BP3	ENSG00000136231.13	4.90324	0.818221	0.00300702	UP	ON	protein coding	UP	UP
chr3:55002066..55002104,+	p@chr3:55002066..55002104,+	CACNA2D3		4.90313	1.12547	0.0339917	UP		protein coding gene body		UP
chr11:5166455..5166462,+	p@chr11:5166455..5166462,+		NA	4.90308	0.261811	0.0471461	UP	ON	not annotated	NA	NA	NA	NA
chr12:104674521..104674536,-	p4@ENST00000549807	RP11-818F20.5	ENSG00000257732.1	4.90295	0.399552	0.00392562	UP	ON	antisense	UP	UP	ON	ON
chr22:38506619..38506678,-	p2@BAIAP2L2	BAIAP2L2	ENSG00000128298.16	4.90103	0.797395	0.0162779	UP		protein coding	UP	UP	ON
chr14:104394770..104394820,+	p1@TDRD9	TDRD9	ENSG00000156414.18	4.90064	1.14025	0.0199981	UP		protein coding				OFF
chr5:92498181..92498202,-	p@chr5:92498181..92498202,-		NA	4.89867	0.89954	0.00635723	UP	ON	linc	NA	NA	NA	NA
chr12:19389814..19389872,+	p2@PLEKHA5	PLEKHA5	ENSG00000052126.14	4.89804	1.50436	0.0266718	UP		protein coding
chrX:137793808..137793823,-	p3@FGF13	FGF13	ENSG00000129682.13	4.8977	0.41922	0.0436386	UP		protein coding	UP
chr2:102758751..102758779,+	p15@IL1R1	IL1R1		4.89682	0.732836	0.0234239	UP		protein coding		DOWN
chr2:197124944..197124958,+	p3@ENST00000433933,p3@uc002utn.1	AC020571.3	ENSG00000229056.2	4.89521	0.385873	0.0299755	UP		antisense
chr19:51472185..51472197,-	p11@KLK6	KLK6	ENSG00000167755.13	4.89309	0.318955	0.0336817	UP	ON	protein coding	UP	UP	ON	ON
chr3:13063900..13063917,-	p@chr3:13063900..13063917,-	IQSEC1	NA	4.89195	0.398558	0.011074	UP	ON	protein coding gene body		DOWN
chr1:15563005..15563040,+	p@chr1:15563005..15563040,+			4.89155	0.445155	0.0383652	UP		protein coding	NA	NA	NA	NA
chr13:46786051..46786115,+	p1@LRRC63	LRRC63	ENSG00000173988.12	4.88904	0.409353	0.00463701	UP	ON	protein coding	NA	NA	NA	NA
chr5:140474181..140474227,+	p1@PCDHB2	PCDHB2	ENSG00000112852.6	4.88836	2.64062	2.85044e-05	UP		protein coding	UP
chr7:96635178..96635181,+	p1@DLX6	DLX6	ENSG00000006377.10	4.88829	0.371659	0.00794438	UP	ON	protein coding	UP	UP	ON	ON
chr17:76480937..76480971,+	p@chr17:76480937..76480971,+	RP11-559N14.5	ENSG00000267432.5	4.88816	1.22687	0.00465218	UP		antisense	NA	NA	NA	NA
chr10:133879507..133879524,+	p@chr10:133879507..133879524,+		NA	4.8863	0.381191	0.000411017	UP	ON	protein coding	NA	NA	NA	NA
chr14:51561784..51561854,-	p1@TRIM9	TRIM9	ENSG00000100505.13	4.88548	1.38513	2.83714e-06	UP	ON	protein coding	UP	UP
chr3:40547564..40547616,+	p1@ZNF620	ZNF620	ENSG00000177842.11	4.88484	1.14847	2.70992e-08	UP	ON	protein coding
chr9:102584159..102584174,+	p2@NR4A3	NR4A3	ENSG00000119508.17	4.88315	1.79369	9.98636e-05	UP	ON	protein coding	DOWN	DOWN
chr5:32710736..32710788,+	p2@NPR3	NPR3	ENSG00000113389.15	4.88214	2.09396	3.61764e-05	UP		protein coding	DOWN
chr7:93690403..93690432,+	p2@ENST00000438538	AC003092.1	ENSG00000236453.5	4.88133	0.887377	0.0164494	UP	ON	linc	NA	NA	NA	NA
chr4:159131486..159131501,+	p8@TMEM144	TMEM144	ENSG00000164124.10	4.88128	1.03462	0.000671688	UP	ON	protein coding
chr12:100378673..100378742,-	p4@ANKS1B	ANKS1B	ENSG00000185046.18	4.88101	0.393376	5.51377e-05	UP	ON	protein coding			OFF	OFF
chr17:54672417..54672422,+	p@chr17:54672417..54672422,+	NOG	NA	4.88027	2.1844	0.000310396	UP		protein coding gene body			OFF	OFF
chr19:51071705..51071732,-	p2@LRRC4B	LRRC4B	ENSG00000131409.12	4.88016	0.699283	0.00553267	UP	ON	protein coding	DOWN	DOWN
chr7:101917482..101917507,+	p6@CUX1	CUX1	ENSG00000257923.9	4.87499	1.61221	0.00069344	UP		protein coding
chr19:55720862..55720880,-	p1@PTPRH	PTPRH	ENSG00000080031.9	4.87494	1.16087	0.00291728	UP		protein coding	UP	UP	ON	ON
chr17:6659354..6659398,+	p1@XAF1	XAF1	ENSG00000132530.16	4.87388	1.36407	0.00173668	UP		protein coding
chr2:142888573..142888591,-	p3@LRP1B	LRP1B	ENSG00000168702.16	4.87347	0.402547	0.0049453	UP	ON	protein coding	UP	UP
chr1:246887360..246887371,+	p4@SCCPDH	SCCPDH	ENSG00000143653.9	4.87306	1.51646	0.00559283	UP		protein coding
chr7:100813224..100813240,-	p@chr7:100813224..100813240,-		NA	4.87299	0.358066	0.0370945	UP	ON	not annotated	NA	NA	NA	NA
chr10:101690650..101690683,-	p2@DNMBP	DNMBP	NA	4.8723	2.9951	4.19967e-06	UP		protein coding
chr3:11610255..11610280,-	p8@VGLL4	VGLL4	ENSG00000144560.13	4.87213	0.402577	0.00402514	UP	ON	protein coding
chr11:122027681..122027697,-	p@chr11:122027681..122027697,-	RP11-820L6.1	NA	4.87212	0.810267	0.00545867	UP	ON	lncrna	NA	NA	NA	NA
chr19:46285740..46285754,-	p1@DMPK	DMPK	ENSG00000104936.17	4.87147	0.806416	0.00178738	UP	ON	protein coding
chrX:92928557..92928613,-	p1@NAP1L3	NAP1L3	ENSG00000186310.9	4.87019	1.04783	0.000438302	UP	ON	protein coding				ON
chr12:10022416..10022475,-	p3@CLEC2B	CLEC2B	ENSG00000110852.4	4.86905	0.406225	0.00150385	UP	ON	protein coding
chrX:33059467..33059499,+	p1@TBCAP1	TBCAP1	ENSG00000226781.1	4.86793	1.71321	2.07551e-06	UP		pseudogene				ON
chr5:55419911..55419941,+	p@chr5:55419911..55419941,+		NA	4.86703	0.3984	0.00826741	UP	ON	not annotated	NA	NA	NA	NA
chr2:693380..693398,+	p@chr2:693380..693398,+	AC092159.2	NA	4.86568	0.381565	0.0299631	UP		antisense	NA	NA	NA	NA
chr5:140235469..140235541,+	p1@PCDHA10	PCDHA10	ENSG00000250120.6	4.86485	1.35277	0.00134546	UP		protein coding		DOWN		OFF
chr17:73606766..73606791,+	p2@MYO15B	MYO15B		4.86481	0.408983	0.0364977	UP		protein coding
chr20:46653922..46653986,+	p@chr20:46653922..46653986,+		NA	4.86454	0.24816	0.031101	UP		linc	NA	NA	NA	NA
chr4:189081194..189081225,+	p1@ENST00000502419	RP11-366H4.1	ENSG00000248370.1	4.86422	0.418548	0.0421839	UP		linc				ON
chr15:27018884..27018916,-	p3@GABRB3	GABRB3	ENSG00000166206.13	4.86247	0.348659	0.0170233	UP	ON	protein coding				OFF
chr4:77155662..77155702,-	p@chr4:77155662..77155702,-		NA	4.86179	0.949979	0.00124997	UP	ON	protein coding	NA	NA	NA	NA
chr19:9406118..9406133,-	p@chr19:9406118..9406133,-	ZNF699		4.86163	1.16985	0.0484755	UP		protein coding gene body				ON
chr19:42007124..42007140,-	p@chr19:42007124..42007140,-			4.85974	0.380705	0.00757699	UP	ON	linc	NA	NA	NA	NA
chr11:65321313..65321324,-	p21@LTBP3	LTBP3	ENSG00000168056.14	4.85715	0.315215	0.0398941	UP	ON	protein coding
chr21:45845539..45845607,+	p4@TRPM2	TRPM2	ENSG00000142185.16	4.85519	1.14761	0.00450742	UP		protein coding	UP	UP
chr2:171571931..171571959,+	p3@SP5	SP5	ENSG00000204335.3	4.85474	0.35486	0.0367465	UP	ON	protein coding	UP	UP		OFF
chr10:5057199..5057247,-	p@chr10:5057199..5057247,-	AKR1C2	ENSG00000151632.16	4.85369	0.260686	0.0447308	UP	ON	protein coding	UP	UP	ON	ON
chr17:42733803..42733843,+	p1@C17orf104	C17orf104	ENSG00000180336.17	4.85344	1.06382	0.00270261	UP		protein coding	UP	UP		ON
chr6:129940950..129940961,-	p@chr6:129940950..129940961,-	ARHGAP18	NA	4.85329	0.391349	0.00213213	UP	ON	protein coding gene body	DOWN	DOWN
chr3:55539287..55539292,-	p1@ENST00000472238	RP11-875H7.5	ENSG00000242317.1	4.85324	1.00932	0.0150763	UP		linc		UP	ON	ON
chr11:17555398..17555410,-	p9@USH1C	USH1C	ENSG00000006611.15	4.85025	0.39664	0.0436554	UP		protein coding	UP	UP
chr6:124124712..124124731,+	p2@NKAIN2		NA	4.84638	0.278634	0.0408547	UP	ON	not annotated	NA	NA	NA	NA
chr1:114430180..114430195,-	p2@BCL2L15	BCL2L15		4.84516	0.727299	0.0470828	UP		protein coding	UP		ON
chr11:122018727..122018742,-	p@chr11:122018727..122018742,-		NA	4.84311	2.41141	3.63106e-06	UP		not annotated	NA	NA	NA	NA
chr21:47063625..47063658,+	p1@PCBP3	PCBP3	ENSG00000183570.16	4.84298	3.31371	0.00140775	UP		protein coding				ON
chr1:66458409..66458428,+	p5@PDE4B	PDE4B	ENSG00000184588.17	4.84117	0.325339	0.0327265	UP	ON	protein coding
chr17:74236559..74236626,-	p1@RNF157	RNF157	ENSG00000141576.14	4.84111	1.54033	3.74705e-05	UP	ON	protein coding	UP
chr7:94537017..94537072,+	p3@PPP1R9A	PPP1R9A	ENSG00000158528.11	4.84079	1.46351	2.14909e-06	UP	ON	protein coding		DOWN
chr6:56607215..56607225,-	p@chr6:56607215..56607225,-	DST	NA	4.8403	0.405835	0.0382965	UP	ON	protein coding gene body	DOWN
chr1:65730385..65730468,+	p2@DNAJC6	DNAJC6	ENSG00000116675.15	4.83979	0.334498	0.036157	UP	ON	protein coding
chr2:234296792..234296806,+	p13@DGKD	DGKD		4.83857	0.39496	0.0390874	UP		protein coding
chr11:65266121..65266168,+	p6@MALAT1	MALAT1	ENSG00000251562.7	4.83634	1.29533	9.77386e-05	UP	ON	linc
chr12:104760413..104760416,+	p@chr12:104760413..104760416,+		NA	4.83436	0.372929	0.000360871	UP	ON	not annotated	NA	NA	NA	NA
chrX:146959449..146959485,+	p@chrX:146959449..146959485,+		NA	4.83398	0.38688	0.00681209	UP	ON	linc	NA	NA	NA	NA
chr19:46684088..46684108,-	p@chr19:46684088..46684108,-	AC006262.4	ENSG00000269729.1	4.83251	1.48942	0.0277618	UP		linc				ON
chr19:46684114..46684142,-	p@chr19:46684114..46684142,-	AC006262.4	ENSG00000269729.1	4.82935	2.26791	0.0332438	UP		linc				ON
chr11:128376979..128377025,-	p@chr11:128376979..128377025,-	ETS1	NA	4.82747	0.417637	0.0236403	UP	ON	protein coding gene body	DOWN	DOWN
chr7:32110008..32110058,-	p4@PDE1C	PDE1C	ENSG00000154678.16	4.82634	0.395832	0.0415727	UP		protein coding	DOWN	DOWN		OFF
chr3:179754806..179754872,-	p2@PEX5L	PEX5L	ENSG00000114757.18	4.82233	0.480361	0.0449932	UP		protein coding	UP	UP
chr9:138393188..138393204,+	p@chr9:138393188..138393204,+	MRPS2		4.82217	0.76518	0.0391503	UP		protein coding
chr7:5938351..5938379,+	p2@CCZ1B,p2@CCZ1	CCZ1	ENSG00000122674.11	4.82059	0.894167	0.0112825	UP	ON	protein coding	NA	NA	NA	NA
chr8:143695830..143695845,-	p1@ARC	ARC	ENSG00000198576.3	4.8204	1.48192	0.000162947	UP	ON	protein coding	DOWN	DOWN
chr15:59904045..59904065,+	p3@GCNT3	GCNT3		4.81927	1.01369	0.0147323	UP	ON	protein coding	UP	UP	ON
chr20:36012051..36012065,+	p16@SRC	SRC	ENSG00000197122.11	4.81704	0.383987	0.0324064	UP		protein coding
chr1:66798006..66798040,+	p1@PDE4B	PDE4B	ENSG00000184588.17	4.81578	1.92645	0.00244472	UP		protein coding
chr17:76480917..76480935,+	p@chr17:76480917..76480935,+	RP11-559N14.5	ENSG00000267432.5	4.8156	0.359474	0.00247674	UP	ON	antisense	NA	NA	NA	NA
chr19:49339091..49339129,-	p@chr19:49339091..49339129,-	HSD17B14	ENSG00000087076.8	4.81321	0.360022	7.65176e-05	UP	ON	protein coding
chr8:123580905..123580931,-	p@chr8:123580905..123580931,-		NA	4.81226	1.92181	0.0141603	UP		linc	NA	NA	NA	NA
chr10:112404070..112404099,+	p2@RBM20	RBM20	ENSG00000203867.7	4.81155	0.801799	0.000650733	UP	ON	protein coding
chr1:114430197..114430210,-	p1@BCL2L15	BCL2L15	ENSG00000188761.11	4.81064	0.994704	0.035605	UP		protein coding	UP		ON
chr2:200323414..200323455,-	p1@SATB2	SATB2	ENSG00000119042.16	4.81002	2.35696	1.48171e-06	UP		protein coding	UP	UP
chr4:1107306..1107369,-	p1@RNF212	RNF212	ENSG00000178222.12	4.80753	3.22623	0.0001244	UP		protein coding	UP
chr15:65592968..65592974,-	p2@PARP16	PARP16	ENSG00000138617.14	4.80702	0.385281	0.0311762	UP	ON	protein coding
chr7:131241296..131241307,-	p3@PODXL	PODXL	ENSG00000128567.16	4.80673	1.87131	0.000552962	UP		protein coding		DOWN
chr9:133884528..133884594,+	p1@LAMC3	LAMC3	ENSG00000050555.17	4.8062	1.65068	0.00095372	UP	ON	protein coding	DOWN	DOWN
chr14:100841699..100841706,-	p5@WARS	WARS	ENSG00000140105.17	4.80614	0.836865	0.000459809	UP	ON	protein coding
chrX:15288154..15288229,-	p1@ASB9	ASB9	ENSG00000102048.15	4.80525	1.01234	2.60827e-05	UP	ON	protein coding
chr2:175411878..175411891,+	p1@ENST00000442996,p1@uc002uiw.2	AC018890.6	ENSG00000236449.1	4.80392	0.297878	0.0363512	UP	ON	antisense	UP	UP	ON	ON
chr6:27776055..27776066,+	p19@HIST1H3H	HIST1H2AI	ENSG00000196747.4	4.80213	0.301498	0.0272185	UP	ON	protein coding	UP	UP	ON	ON
chr2:115919597..115919632,-	p@chr2:115919597..115919632,-		NA	4.80195	1.23485	0.0239526	UP		lncrna	NA	NA	NA	NA
chr19:6591191..6591209,-	p5@CD70	CD70	ENSG00000125726.10	4.80132	0.35251	0.00748384	UP	ON	protein coding	UP	UP
chr2:233352555..233352566,-	p2@ECEL1	ECEL1	ENSG00000171551.11	4.80095	0.279127	0.0288056	UP		protein coding	UP	UP	ON	ON
chr12:1919552..1919568,+	p@chr12:1919552..1919568,+		NA	4.80076	0.400183	0.0480328	UP		lncrna	NA	NA	NA	NA
chr2:202719443..202719522,+	p1@CDK15	CDK15	ENSG00000138395.14	4.79896	1.62064	0.0286388	UP		protein coding	DOWN	DOWN	OFF	OFF
chr19:49631859..49631871,+	p7@PPFIA3	PPFIA3	ENSG00000177380.13	4.79739	0.735718	0.000724265	UP	ON	protein coding	UP	UP
chr11:84148598..84148663,-	p6@DLG2	DLG2		4.79738	0.196478	0.0340229	UP		protein coding
chr13:114780855..114780894,-	p@chr13:114780855..114780894,-	RASA3	NA	4.79645	0.382429	0.0317891	UP	ON	protein coding gene body
chr4:165675319..165675335,+	p1@LOC100505989	RP11-294O2.2	ENSG00000248771.5	4.79086	0.389124	0.0460206	UP	ON	linc	NA	NA	NA	NA
chr3:46448527..46448573,-	p1@ENST00000451485	RP11-24F11.2	ENSG00000223552.1	4.7903	2.14584	0.00454856	UP		antisense		DOWN	OFF	OFF
chr21:41002196..41002235,+	p5@B3GALT5	AF064860.5	ENSG00000225330.1	4.78593	0.380235	0.00864578	UP	ON	lncrna
chr4:88902673..88902729,+	p@chr4:88902673..88902729,+	SPP1	NA	4.78491	0.345893	0.0255161	UP	ON	protein coding gene body	UP	UP
chr16:1128614..1128627,-	p1@LOC146336	SSTR5-AS1	ENSG00000261713.6	4.78346	0.360606	0.0398941	UP	ON	lncrna	NA	NA	NA	NA
chr5:179757851..179757870,-	p4@GFPT2	GFPT2	ENSG00000131459.12	4.78147	1.1545	0.0042072	UP		protein coding
chr7:5938386..5938430,+	p1@CCZ1B,p1@CCZ1	CCZ1	ENSG00000122674.11	4.78071	0.701733	0.00684695	UP	ON	protein coding	NA	NA	NA	NA
chr11:102826454..102826469,-	p1@MMP13	MMP13	ENSG00000137745.11	4.77967	3.0298	0.00400463	UP		protein coding	UP	UP	ON	ON
chr11:14665329..14665356,+	p1@PDE3B	PDE3B	ENSG00000152270.8	4.77837	0.904333	0.000177706	UP	ON	protein coding		DOWN
chr11:69063861..69063881,+	p@chr11:69063861..69063881,+	MYEOV	NA	4.77725	0.36567	0.0144974	UP	ON	protein coding gene body	UP	UP		ON
chr6:121756901..121756912,+	p4@GJA1	GJA1		4.77659	0.737269	0.0481991	UP		protein coding	DOWN
chr12:54378923..54378966,+	p1@HOXC10	HOXC10	ENSG00000180818.4	4.77624	0.334211	0.0142284	UP	ON	protein coding	UP	UP		ON
chr1:246469406..246469412,-	p18@SMYD3	SMYD3	ENSG00000185420.18	4.77599	0.335241	0.0365858	UP		protein coding
chr10:101691199..101691208,-	p11@DNMBP	DNMBP	NA	4.77529	0.346612	0.0127141	UP	ON	protein coding
chr9:75788791..75788795,+	p@chr9:75788791..75788795,+		NA	4.77378	0.347328	0.000262498	UP	ON	not annotated	NA	NA	NA	NA
chr11:69002371..69002382,-	p@chr11:69002371..69002382,-			4.77224	0.334741	0.0427534	UP		linc	NA	NA	NA	NA
chr17:46724186..46724249,-	p1@ENST00000433510	RP11-357H14.17	ENSG00000272763.1	4.77096	1.84404	0.000987128	UP	ON	linc	UP	UP	ON	ON
chr14:36982948..36982964,-	p7@SFTA3	SFTA3	ENSG00000229415.9	4.76777	0.357225	0.0354264	UP	ON	protein coding		DOWN		OFF
chr8:29107572..29107608,-	p@chr8:29107572..29107608,-	KIF13B	NA	4.76662	0.717307	0.0227534	UP		protein coding gene body		DOWN
chr9:18710688..18710691,+	p@chr9:18710688..18710691,+	ADAMTSL1	NA	4.76619	0.941493	0.0355974	UP	ON	protein coding gene body			ON
chr2:177001290..177001315,+	p1@HOXD3	HOXD3	ENSG00000128652.11	4.76547	0.742949	0.0374123	UP		protein coding	UP	UP
chr15:29745140..29745158,-	p2@FAM189A1	FAM189A1	ENSG00000104059.4	4.76478	0.308995	0.0416712	UP		protein coding	DOWN	DOWN	OFF	OFF
chr11:4718911..4718938,-	p2@OR51E2	OR51E2	ENSG00000167332.7	4.76466	0.311414	0.0301948	UP		protein coding	UP	UP		ON
chr5:94728500..94728543,+	p1@FAM81B	FAM81B	ENSG00000153347.9	4.76341	0.304308	0.00425848	UP	ON	protein coding	DOWN	DOWN	OFF	OFF
chr22:29108124..29108188,-	p4@CHEK2	CHEK2		4.76191	0.731271	0.0215557	UP		protein coding	UP	UP
chr20:52748891..52748895,-	p@chr20:52748891..52748895,-		NA	4.7599	1.14977	4.91217e-05	UP	ON	not annotated	NA	NA	NA	NA
chr10:8087281..8087303,+	p@chr10:8087281..8087303,+		NA	4.75879	0.276049	0.0127141	UP	ON	protein coding	NA	NA	NA	NA
chr19:17516364..17516447,-	p1@BST2	BST2	ENSG00000130303.12	4.75823	3.13606	0.000137938	UP		protein coding
chr2:26045115..26045120,+	p1@ENST00000407942	PTGES3P2	ENSG00000217643.1	4.75816	2.18069	0.00140206	UP		pseudogene			ON
chr1:66458305..66458316,+	p13@PDE4B	PDE4B	ENSG00000184588.17	4.75611	0.206575	0.030144	UP		protein coding
chr17:4854406..4854420,+	p1@ENO3	ENO3	ENSG00000108515.17	4.7554	2.02204	0.00603902	UP	ON	protein coding	UP	UP
chr2:142888550..142888567,-	p2@LRP1B	LRP1B	ENSG00000168702.16	4.75438	0.336699	0.0044596	UP	ON	protein coding	UP	UP
chr6:139013065..139013100,+	p6@FLJ46906			4.75371	1.10114	0.0342235	UP		lncrna	NA	NA	NA	NA
chr7:131241308..131241331,-	p2@PODXL	PODXL	ENSG00000128567.16	4.75334	3.4863	7.09346e-06	UP		protein coding		DOWN
chr1:39670360..39670383,+	p6@MACF1	MACF1	ENSG00000127603.23	4.75295	1.49889	0.00265891	UP		protein coding		DOWN
chr3:160394961..160394996,+	p2@ARL14	ARL14	ENSG00000179674.3	4.75215	1.58296	0.000238806	UP		protein coding	UP	UP
chr19:50868888..50868902,-	p1@NAPSA	NAPSA	ENSG00000131400.7	4.75083	3.24757	0.0380162	UP		protein coding		DOWN
chr2:234088748..234088763,-	p@chr2:234088748..234088763,-			4.74944	0.325894	0.0443058	UP		lncrna	NA	NA	NA	NA
chr10:133879441..133879471,+	p@chr10:133879441..133879471,+		NA	4.74882	0.31508	0.00229687	UP	ON	protein coding	NA	NA	NA	NA
chr3:31699401..31699405,+	p@chr3:31699401..31699405,+		NA	4.74565	0.326286	7.70885e-05	UP	ON	not annotated	NA	NA	NA	NA
chr3:13461724..13461800,-	p1@NUP210	NUP210	ENSG00000132182.11	4.74458	3.71022	5.62679e-07	UP	ON	protein coding	UP	UP
chr10:102821731..102821752,+	p1@KAZALD1	KAZALD1	ENSG00000107821.14	4.74364	1.16264	8.5859e-05	UP	ON	protein coding	UP
chr4:187422134..187422176,-	p1@ENST00000505103,p1@ENST00000508110,p1@ENST00000508287,p1@uc003izb.1,p1@uc003izc.2	F11-AS1	ENSG00000251165.5	4.74324	1.04617	0.0295837	UP		antisense	NA	NA	NA	NA
chr1:235813290..235813323,-	p2@GNG4	GNG4	ENSG00000168243.10	4.74207	1.03151	0.000911909	UP	ON	protein coding	UP	UP
chr7:84349905..84349926,-	p@chr7:84349905..84349926,-			4.74002	0.345961	0.0425041	UP		linc	NA	NA	NA	NA
chr8:133772798..133772840,-	p1@TMEM71	TMEM71	ENSG00000165071.14	4.73997	1.30658	7.79583e-05	UP	ON	protein coding
chr9:18474125..18474160,+	p1@ADAMTSL1	ADAMTSL1	ENSG00000178031.15	4.73881	3.66909	0.00936018	UP		protein coding			ON
chr12:132863063..132863075,-	p4@GALNT9	GALNT9	ENSG00000182870.8	4.73816	0.359548	0.0202585	UP	ON	protein coding		DOWN
chr21:46351269..46351296,+	p@chr21:46351269..46351296,+		NA	4.73757	0.65864	0.0266423	UP		not annotated	NA	NA	NA	NA
chr19:43422019..43422057,-	p1@PSG6	PSG6	ENSG00000170848.15	4.73632	1.52918	0.00492863	UP		protein coding	UP	UP	ON	ON
chr14:29299437..29299470,+	p1@ENST00000548087,p1@ENST00000550122,p1@ENST00000550827,p1@ENST00000551588	CTD-2384A14.1	ENSG00000258038.5	4.73565	1.55774	0.0153546	UP		linc	NA	NA	NA	NA
chr21:21272095..21272109,+	p@chr21:21272095..21272109,+		NA	4.73372	0.228917	0.0368008	UP	ON	linc	NA	NA	NA	NA
chr5:18746250..18746285,-	p1@ENST00000512978	CTD-2023M8.1	ENSG00000248693.1	4.73344	0.7919	6.9037e-05	UP	ON	linc	UP	UP	ON	ON
chr21:36421535..36421610,-	p2@RUNX1	RUNX1	ENSG00000159216.18	4.73213	2.77864	0.000211696	UP		protein coding
chr5:140718320..140718343,+	p1@PCDHGA2	PCDHGA2	ENSG00000081853.14	4.73207	1.62679	0.00867341	UP		protein coding		DOWN
chr20:58508681..58508698,-	p1@SYCP2	SYCP2	ENSG00000196074.12	4.73204	0.757963	0.0158606	UP	ON	protein coding	UP	UP	ON	ON
chr9:79009244..79009257,-	p4@RFK	RFK	ENSG00000135002.11	4.73162	2.8109	8.50403e-05	UP		protein coding
chr13:49345230..49345234,+	p1@PSME2P2	PSME2P2	ENSG00000225131.2	4.72739	0.322627	0.00445842	UP	ON	pseudogene
chr17:73763850..73763855,-	p@chr17:73763850..73763855,-		NA	4.72681	0.32291	0.000459458	UP	ON	not annotated	NA	NA	NA	NA
chr8:62627334..62627381,-	p6@ASPH	ASPH	ENSG00000198363.15	4.72356	2.68237	3.9243e-07	UP		protein coding	UP
chr6:148809067..148809074,+	p@chr6:148809067..148809074,+	SASH1	NA	4.72347	0.351337	0.0146078	UP	ON	protein coding gene body	DOWN	DOWN
chr16:71418323..71418354,+	p@chr16:71418323..71418354,+	CALB2	NA	4.72335	0.347769	0.0150814	UP	ON	protein coding gene body			OFF
chr5:140180635..140180677,+	p1@PCDHA3	PCDHA3	ENSG00000255408.3	4.72279	0.716529	0.00909027	UP	ON	protein coding		DOWN		OFF
chr10:101691056..101691064,-	p13@DNMBP	DNMBP	NA	4.72197	0.298468	0.0377592	UP		protein coding
chr20:30555945..30555984,+	p1@XKR7	XKR7		4.72182	0.159862	0.0401291	UP		protein coding	UP	UP
chr1:91317158..91317226,-	p1@ENST00000435649,p1@ENST00000443802,p1@uc001dnu.1	RP4-665J23.1	ENSG00000233593.7	4.72112	1.82391	1.89624e-09	UP		linc	NA	NA	NA	NA
chr19:16045331..16045344,-	p4@CYP4F11	CYP4F11	ENSG00000171903.16	4.71968	0.895228	0.00213425	UP	ON	protein coding	UP	UP
chr3:183947366..183947381,+	p@chr3:183947366..183947381,+	EIF2B5	NA	4.7194	0.258806	0.0140527	UP	ON	protein coding gene body		UP
chr5:100238920..100238949,-	p2@ST8SIA4	ST8SIA4	ENSG00000113532.12	4.71926	0.829427	0.00210803	UP	ON	protein coding
chr21:44985098..44985109,+	p1@H2BFS	H2BFS	ENSG00000274559.2	4.71698	0.272979	0.0342408	UP	ON	pseudogene	NA
chr1:51434441..51434456,+	p5@CDKN2C	CDKN2C	ENSG00000123080.10	4.71623	0.312078	0.000175781	UP	ON	protein coding
chr21:44817397..44817432,-	p@chr21:44817397..44817432,-		NA	4.71457	0.31612	0.00974806	UP	ON	linc	NA	NA	NA	NA
chr11:117698787..117698813,-	p2@FXYD2	FXYD2		4.71233	0.618241	0.0467685	UP		protein coding	UP	UP	OFF	OFF
chr6:6007111..6007181,-	p1@NRN1	NRN1	ENSG00000124785.8	4.70835	2.6619	0.0211889	UP		protein coding	DOWN
chr17:54281055..54281104,+	p@chr17:54281055..54281104,+	ANKFN1	NA	4.70551	0.74722	0.000938626	UP	ON	protein coding gene body		DOWN		OFF
chr10:72576547..72576568,+	p10@SGPL1	SGPL1		4.70547	0.91539	0.0198485	UP		protein coding	UP	UP
chr1:204797749..204797855,+	p1@NFASC	NFASC	ENSG00000163531.15	4.70358	1.9721	0.0044033	UP		protein coding	DOWN		ON
chr5:52083828..52083843,+	p6@PELO	ITGA1		4.70295	0.72557	0.0214389	UP	ON	protein coding		DOWN
chr11:31832807..31832823,-	p4@PAX6	PAX6	ENSG00000007372.20	4.70283	0.292928	0.00940589	UP	ON	protein coding	DOWN	UP
chr1:224776684..224776688,+	p@chr1:224776684..224776688,+	CNIH3	NA	4.70269	0.608488	0.00634661	UP	ON	protein coding gene body	UP	UP
chr8:89339870..89339896,-	p1@MMP16	MMP16	ENSG00000156103.15	4.7011	0.267134	0.0202856	UP	ON	protein coding	UP		ON
chr12:81331460..81331505,-	p1@LIN7A	LIN7A	ENSG00000111052.7	4.69868	2.95679	0.0139364	UP		protein coding	DOWN			OFF
chrX:19140694..19140760,-	p2@GPR64	GPR64	ENSG00000173698.17	4.69861	0.74931	0.0124556	UP	ON	protein coding			ON
chr17:46806067..46806097,-	p1@HOXB13	HOXB13	ENSG00000159184.7	4.6984	0.309715	0.00520797	UP	ON	protein coding	UP	UP	ON	ON
chr12:54402745..54402788,+	p1@HOXC8	HOXC8	ENSG00000037965.5	4.69805	0.722612	0.00502044	UP	ON	protein coding	UP	UP		ON
chr11:122027745..122027771,-	p@chr11:122027745..122027771,-	RP11-820L6.1	NA	4.69789	0.636757	0.00788073	UP	ON	lncrna	NA	NA	NA	NA
chr17:37382029..37382048,-	p2@STAC2	STAC2	ENSG00000141750.6	4.69741	0.294964	0.0361896	UP		protein coding	UP	UP	OFF	OFF
chr2:108905469..108905502,+	p2@SULT1C2	SULT1C2	ENSG00000198203.9	4.69734	0.757748	0.00812515	UP	ON	protein coding	UP	DOWN		OFF
chr2:235887339..235887353,+	p9@SH3BP4	SH3BP4	ENSG00000130147.15	4.69683	0.31907	0.0104878	UP	ON	protein coding
chr5:19988288..19988330,-	p1@CDH18	CDH18	ENSG00000145526.11	4.69673	0.243268	0.0477136	UP		protein coding	UP	UP		ON
chr7:29186008..29186172,-	p1@CPVL	CPVL	ENSG00000106066.13	4.69443	3.50364	0.00721194	UP		protein coding		DOWN
chr5:38468431..38468480,-	p1@ENST00000510137	CTD-2263F21.1	ENSG00000251257.2	4.69298	2.13991	0.00673968	UP		antisense			ON	ON
chr18:8707570..8707590,-	p@chr18:8707570..8707590,-	RP11-674N23.1	ENSG00000265962.1	4.69297	0.314141	0.0204428	UP	ON	antisense		UP		ON
chr2:230450858..230450884,-	p@chr2:230450858..230450884,-	DNER	NA	4.69017	0.67516	0.0196431	UP	ON	protein coding gene body	UP
chr15:62853562..62853614,+	p3@TLN2	TLN2	ENSG00000171914.14	4.68932	0.352136	0.0427965	UP		protein coding
chr6:142369203..142369226,-	p@chr6:142369203..142369226,-			4.68829	0.343902	0.0452451	UP		protein coding	NA	NA	NA	NA
chr9:100337315..100337330,+	p@chr9:100337315..100337330,+	TMOD1		4.68781	0.348404	0.0315501	UP		protein coding gene body	DOWN	DOWN
chr17:38821373..38821440,-	p1@KRT222,p2@SMARCE1	KRT222	ENSG00000213424.8	4.686	0.742375	0.0179482	UP		protein coding
chr4:142253761..142253777,-	p1@ENST00000511213	RP11-362F19.1	ENSG00000248810.1	4.68541	0.617976	0.0439438	UP		linc			ON	ON
chr5:140529630..140529675,+	p1@PCDHB6	PCDHB6	ENSG00000113211.5	4.68274	0.830915	0.00181053	UP	ON	protein coding		UP	ON
chr8:19615402..19615427,-	p3@CSGALNACT1	CSGALNACT1	ENSG00000147408.14	4.68092	1.47397	0.00366708	UP		protein coding		DOWN
chr12:52450298..52450331,+	p11@NR4A1	NR4A1	ENSG00000123358.19	4.67941	0.30873	0.00414269	UP	ON	protein coding	DOWN	DOWN
chr2:47335914..47335927,-	p25@CALM2,p31@CALM3,p45@CALM1	C2orf61	ENSG00000239605.8	4.67818	0.303299	0.0436781	UP	ON	protein coding
chr10:67651195..67651279,-	p@chr10:67651195..67651279,-		NA	4.67736	0.282757	0.0229325	UP	ON	linc	NA	NA	NA	NA
chr12:54332608..54332636,+	p1@HOXC13	HOXC13	ENSG00000123364.4	4.67693	0.719303	0.000565756	UP	ON	protein coding	UP	UP	ON	ON
chr9:71320596..71320633,+	p3@PIP5K1B	PIP5K1B	ENSG00000107242.17	4.67234	0.546027	0.0160264	UP	ON	protein coding	DOWN	DOWN	ON
chr19:6591113..6591172,-	p1@CD70	CD70	ENSG00000125726.10	4.67193	2.11017	0.00258649	UP		protein coding	UP	UP
chr1:78956651..78956747,+	p1@PTGFR	PTGFR	ENSG00000122420.9	4.67122	0.326136	0.0375532	UP	ON	protein coding	DOWN	DOWN
chr1:29241128..29241159,+	p3@EPB41	EPB41	ENSG00000159023.18	4.67107	0.284391	0.000721828	UP	ON	protein coding
chr14:73930312..73930321,-	p4@NUMB	NUMB	ENSG00000133961.19	4.66937	0.312477	0.0176149	UP	ON	protein coding
chr11:122027845..122027860,-	p@chr11:122027845..122027860,-	RP11-820L6.1	NA	4.66911	0.625197	0.00526354	UP	ON	lncrna	NA	NA	NA	NA
chr2:100938607..100938634,-	p@chr2:100938607..100938634,-	LONRF2	NA	4.66842	0.278969	0.00172419	UP	ON	protein coding
chr4:167119415..167119458,+	p@chr4:167119415..167119458,+		NA	4.66827	0.283576	0.0488802	UP		linc	NA	NA	NA	NA
chr13:76363164..76363178,+	p9@LMO7	LMO7	ENSG00000136153.19	4.66442	0.877151	0.00492159	UP		protein coding	DOWN	DOWN
chr7:100992765..100992768,+	p@chr7:100992765..100992768,+		NA	4.66386	0.554959	0.000828344	UP	ON	pseudogene	NA	NA	NA	NA
chr12:127545156..127545162,+	p@chr12:127545156..127545162,+		NA	4.66381	0.589666	0.0151181	UP	ON	linc	NA	NA	NA	NA
chr12:131200810..131200859,-	p1@RIMBP2	RIMBP2	ENSG00000060709.13	4.66279	0.836312	0.0340466	UP		protein coding	UP	UP	OFF
chr19:55720826..55720849,-	p2@PTPRH	PTPRH	ENSG00000080031.9	4.66148	0.28902	0.0340736	UP	ON	protein coding	UP	UP	ON	ON
chr16:56225391..56225420,+	p1@GNAO1	GNAO1	ENSG00000087258.13	4.66104	0.655509	0.00224769	UP	ON	protein coding
chr1:6086385..6086411,+	p1@KCNAB2	KCNAB2	ENSG00000069424.14	4.66095	1.66924	3.84066e-05	UP		protein coding		DOWN
chr10:101542411..101542414,+	p7@ABCC2	ABCC2	ENSG00000023839.10	4.66071	0.292721	0.0323285	UP	ON	protein coding	UP	UP
chrX:138287176..138287192,-	p1@FGF13	FGF13	ENSG00000129682.13	4.66051	0.994248	0.00154915	UP	ON	protein coding	UP
chr13:46756758..46756805,-	p11@LCP1	LCP1	ENSG00000136167.13	4.65999	0.279328	0.0153661	UP	ON	protein coding		DOWN
chr7:157361711..157361723,-	p3@PTPRN2	PTPRN2	NA	4.65879	1.27547	0.0131731	UP		protein coding gene body		DOWN
chr16:85496342..85496395,+	p@chr16:85496342..85496395,+		NA	4.65843	0.809921	0.0223003	UP		linc	NA	NA	NA	NA
chr10:28287968..28288010,-	p1@ARMC4	ARMC4	ENSG00000169126.15	4.65702	0.295497	0.0111113	UP	ON	protein coding	DOWN	DOWN	OFF	OFF
chr5:175298256..175298267,-	p@chr5:175298256..175298267,-		NA	4.65701	0.267636	0.0498635	UP		lncrna	NA	NA	NA	NA
chr3:98700032..98700043,+	p7@ENST00000473756	LINC00973	ENSG00000240476.1	4.65691	0.304797	0.00388386	UP	ON	linc	UP	UP	ON	ON
chr3:149253493..149253497,-	p@chr3:149253493..149253497,-	WWTR1	NA	4.65642	0.684435	4.94819e-06	UP	ON	protein coding gene body
chr7:142552033..142552082,+	p@chr7:142552033..142552082,+			4.65527	0.310734	0.0339814	UP		protein coding	NA	NA	NA	NA
chr17:41393591..41393606,+	p@chr17:41393591..41393606,+		NA	4.65257	3.87563	1.03904e-08	UP		linc	NA	NA	NA	NA
chrX:152486124..152486143,-	p3@MAGEA1	MAGEA1		4.65239	0.30402	0.0457716	UP		protein coding	UP	UP	ON	ON
chr5:179894225..179894246,+	p@chr5:179894225..179894246,+		NA	4.65194	1.28294	0.00859509	UP		linc	NA	NA	NA	NA
chr14:56585048..56585150,+	p1@PELI2	PELI2	ENSG00000139946.9	4.64882	3.19642	1.56536e-06	UP		protein coding
chr8:143317560..143317581,-	p@chr8:143317560..143317581,-	TSNARE1		4.64746	0.144639	0.0478347	UP		protein coding gene body
chr12:15865824..15865839,-	p9@EPS8	EPS8	ENSG00000151491.12	4.64715	0.294055	0.030833	UP	ON	protein coding
chr3:238427..238455,+	p4@CHL1	CHL1		4.64617	0.301704	0.0472016	UP		protein coding	UP			ON
chr1:92351667..92351689,-	p1@TGFBR3	TGFBR3	ENSG00000069702.10	4.64298	2.33445	0.00146323	UP		protein coding	DOWN	DOWN
chr14:77843721..77843762,+	p1@SAMD15	SAMD15	ENSG00000100583.4	4.6407	1.92086	1.7285e-07	UP		protein coding
chr8:27466577..27466595,-	p8@CLU	CLU	NA	4.64069	0.282653	0.00994601	UP	ON	protein coding gene body		DOWN
chr5:140227945..140227976,+	p1@PCDHA9	PCDHA9		4.64009	0.135631	0.0322797	UP	ON	protein coding				OFF
chr10:4828673..4828695,+	p10@AKR1E2	AKR1E2	ENSG00000165568.17	4.63978	0.320992	0.0403928	UP		protein coding	UP	UP
chr16:81214917..81214946,-	p1@PKD1L2	PKD1L2	ENSG00000166473.16	4.63934	0.273758	0.00744897	UP	ON	other	UP	UP	OFF	OFF
chr19:52646236..52646246,+	p2@ENST00000492641	CTC-471J1.9	ENSG00000243680.1	4.63863	0.265415	0.0265316	UP	ON	linc		UP		ON
chr22:22012042..22012063,+	p@chr22:22012042..22012063,+	PPIL2	NA	4.63793	0.280422	0.000835837	UP	ON	protein coding gene body
chrX:28605529..28605608,+	p1@IL1RAPL1	IL1RAPL1	ENSG00000169306.9	4.63778	0.247987	0.0358714	UP		protein coding
chr12:69004707..69004718,+	p2@RAP1B	RAP1B	ENSG00000127314.17	4.63743	0.256726	0.0158777	UP	ON	protein coding
chr22:31460092..31460140,+	p4@SMTN	SMTN	ENSG00000183963.18	4.63662	1.70254	7.82797e-06	UP		protein coding
chr16:735116..735143,-	p@chr16:735116..735143,-	WDR24	NA	4.63334	0.277505	0.0183613	UP	ON	protein coding gene body
chr20:57414723..57414742,+	p42@GNAS	GNAS		4.63307	0.27698	0.0287001	UP		protein coding
chr2:189157536..189157565,+	p1@GULP1	GULP1	ENSG00000144366.15	4.63099	3.29729	1.21437e-10	UP		protein coding
chr19:51071649..51071703,-	p1@LRRC4B	LRRC4B	ENSG00000131409.12	4.63083	1.4478	0.0244563	UP		protein coding	DOWN	DOWN
chr8:32579302..32579316,+	p9@NRG1	NRG1	ENSG00000157168.14	4.62766	0.258837	0.0407211	UP		protein coding	DOWN
chr20:23807358..23807372,-	p1@CST2	CST2	ENSG00000170369.3	4.6256	0.27464	0.0164902	UP	ON	protein coding	UP	UP	ON
chr3:9595480..9595514,-	p1@LHFPL4	LHFPL4	ENSG00000156959.8	4.62536	0.889838	0.00354892	UP		protein coding	UP	UP		OFF
chr11:112832133..112832151,+	p1@NCAM1	NCAM1	ENSG00000149294.16	4.62205	3.19267	0.0210981	UP		protein coding				ON
chr11:67776012..67776048,+	p3@ALDH3B1	ALDH3B1	ENSG00000006534.15	4.62163	0.76583	0.0118805	UP	ON	protein coding		DOWN
chr9:97317164..97317174,-	p@chr9:97317164..97317174,-		NA	4.62156	0.269154	0.00028369	UP	ON	lncrna	NA	NA	NA	NA
chr22:30653971..30653987,-	p@chr22:30653971..30653987,-		NA	4.62091	1.08029	0.000146611	UP	ON	protein coding	NA	NA	NA	NA
chr1:158985493..158985535,+	p4@IFI16	IFI16	ENSG00000163565.18	4.61954	2.54164	0.00010697	UP		protein coding		UP
chr16:848915..848916,+	p@chr16:848915..848916,+	CHTF18	NA	4.61941	0.275744	0.00467098	UP	ON	protein coding gene body	UP	UP
chr14:56764500..56764503,+	p@chr14:56764500..56764503,+	PELI2	NA	4.6192	0.622339	0.000864814	UP	ON	protein coding gene body
chr12:15942503..15942514,-	p4@EPS8	EPS8	ENSG00000151491.12	4.61841	1.13032	0.000360585	UP		protein coding
chr4:141188244..141188291,+	p@chr4:141188244..141188291,+	SCOC	NA	4.6177	0.269086	0.0272474	UP		protein coding gene body
chr22:50609150..50609199,+	p3@PANX2	PANX2	ENSG00000073150.13	4.6171	1.91074	0.00300364	UP		protein coding	UP	UP
chr3:8794124..8794140,-	p@chr3:8794124..8794140,-	OXTR		4.61668	0.216624	0.042662	UP	ON	protein coding gene body				ON
chr3:174581600..174581648,+	p5@NAALADL2	NAALADL2	ENSG00000177694.14	4.61666	0.613724	0.0107191	UP	ON	protein coding	UP
chr10:64917252..64917255,-	p@chr10:64917252..64917255,-		NA	4.61548	0.266642	0.000919485	UP	ON	not annotated	NA	NA	NA	NA
chr14:95236440..95236465,-	p1@GSC	GSC	ENSG00000133937.4	4.61356	0.2698	0.00887512	UP	ON	protein coding	UP	UP
chr13:100622716..100622766,-	p@chr13:100622716..100622766,-	ZIC5	NA	4.61269	0.262318	6.09129e-05	UP	ON	protein coding gene body	UP	UP	ON	ON
chr10:4823152..4823165,-	p@chr10:4823152..4823165,-		NA	4.61217	0.311021	0.0383516	UP		linc	NA	NA	NA	NA
chr15:56035257..56035355,-	p1@PRTG	PRTG	ENSG00000166450.12	4.60824	2.22544	0.000107431	UP		protein coding		DOWN
chr4:154125565..154125626,+	p1@TRIM2	TRIM2	ENSG00000109654.14	4.60782	3.47865	3.09084e-05	UP		protein coding	UP	UP
chr9:74764340..74764392,+	p1@GDA	GDA	ENSG00000119125.16	4.60669	4.51521	0.00282714	UP		protein coding	UP	UP
chr7:81319656..81319686,+	p@chr7:81319656..81319686,+		NA	4.60531	0.285706	0.0299918	UP		lncrna	NA	NA	NA	NA
chr14:77542519..77542542,-	p1@ENST00000557526,p1@uc001xta.1	RP11-7F17.3	ENSG00000258819.1	4.60531	0.686618	0.0358361	UP		linc	DOWN	DOWN	OFF	OFF
chr12:31272017..31272051,-	p1@uc001rjy.2	RP11-551L14.1	NA	4.60526	0.689165	0.00239065	UP	ON	pseudogene	NA	NA	NA	NA
chr21:11099206..11099217,+	p@chr21:11099206..11099217,+			4.60502	0.258542	0.0466766	UP		linc	NA	NA	NA	NA
chr13:36429874..36429881,-	p13@DCLK1	DCLK1	ENSG00000133083.14	4.605	0.237681	0.0282175	UP	ON	protein coding	UP
chr6:11537971..11538030,+	p1@TMEM170B	TMEM170B	NA	4.60367	1.33887	3.1946e-05	UP		protein coding		DOWN
chr4:41259592..41259619,+	p@chr4:41259592..41259619,+	UCHL1	NA	4.60298	1.21355	4.44624e-05	UP	ON	protein coding gene body	UP	UP
chr11:1213461..1213476,+	p1@uc001lsz.2	MUC5AC	NA	4.60225	0.289718	0.0273314	UP		protein coding gene body	NA	NA	NA	NA
chr20:50159198..50159299,-	p1@NFATC2	NFATC2	ENSG00000101096.19	4.60108	2.57099	0.00335168	UP		protein coding		DOWN
chr8:128909509..128909531,+	p@chr8:128909509..128909531,+	PVT1	NA	4.5998	0.254337	8.89855e-05	UP	ON	lncrna	UP	UP
chr2:157189180..157189290,-	p1@NR4A2	NR4A2	ENSG00000153234.13	4.59953	4.6057	4.94494e-07	UP		protein coding		DOWN
chr16:50582298..50582316,+	p1@NKD1	NKD1		4.59772	1.26476	0.0295846	UP		protein coding
chr19:17799139..17799181,-	p1@UNC13A	UNC13A	ENSG00000130477.14	4.59715	1.32871	0.00600717	UP		protein coding	UP	UP
chr1:3569072..3569093,+	p1@TP73	TP73	ENSG00000078900.14	4.59654	0.248074	0.00283308	UP	ON	protein coding		UP	ON
chr2:177502254..177502360,-	p1@LOC375295	AC017048.3	ENSG00000163364.9	4.59588	2.25183	1.93542e-05	UP		linc	NA	NA	NA	NA
chr19:42817450..42817493,+	p1@TMEM145	TMEM145	ENSG00000167619.11	4.59539	0.252244	0.000513187	UP	ON	protein coding	UP	UP	ON	ON
chr6:56716399..56716422,-	p26@DST	DST	ENSG00000151914.18	4.5908	0.270433	0.0121504	UP	ON	protein coding	DOWN
chr3:195538762..195538775,-	p3@MUC4	MUC4	ENSG00000145113.21	4.59042	0.614954	0.012673	UP	ON	protein coding	UP	UP	ON	ON
chr10:102505493..102505546,+	p2@PAX2	PAX2	ENSG00000075891.21	4.5899	0.225077	0.0396893	UP	ON	protein coding	UP	UP		ON
chr17:43299585..43299657,-	p1@uc002iim.2	CTD-2020K17.1	ENSG00000267121.5	4.58916	2.36698	0.000351851	UP		antisense	NA	NA	NA	NA
chr1:223853355..223853378,-	p2@CAPN8	CAPN8	ENSG00000203697.11	4.58737	1.34071	0.0153292	UP		protein coding	UP	DOWN		OFF
chr2:36806228..36806237,-	p24@FEZ2	FEZ2		4.58721	0.288557	0.0404583	UP	ON	protein coding
chr4:190394055..190394060,+	p1@HSP90AA4P	HSP90AA4P	ENSG00000205100.2	4.58694	0.252694	0.00639608	UP	ON	pseudogene
chr13:100634130..100634143,+	p3@ZIC2	ZIC2	ENSG00000043355.10	4.58425	0.851506	1.72876e-05	UP	ON	protein coding	UP	UP	ON	ON
chr7:14028743..14028799,-	p3@ETV1	ETV1	ENSG00000006468.13	4.58288	1.33337	8.27936e-06	UP	ON	protein coding	DOWN	DOWN
chr1:159869912..159869966,-	p3@CCDC19	CCDC19	ENSG00000213085.9	4.58286	0.6318	0.00672593	UP	ON	protein coding		DOWN		ON
chr17:78450398..78450413,-	p1@NPTX1	NPTX1	ENSG00000171246.5	4.58274	1.89975	0.00539897	UP	ON	protein coding	UP	UP
chr2:44497668..44497671,+	p1@ENST00000429825	AC013717.3	ENSG00000226972.2	4.58261	0.241151	0.0277719	UP	ON	pseudogene
chr2:177053386..177053402,+	p1@HOXD1	HOXD1	ENSG00000128645.12	4.58241	0.708858	0.00236422	UP	ON	protein coding	UP
chr6:14777773..14777808,-	p@chr6:14777773..14777808,-		NA	4.58215	0.225133	0.0341205	UP		linc	NA	NA	NA	NA
chr4:23891660..23891690,-	p1@PPARGC1A	PPARGC1A	ENSG00000109819.8	4.5819	2.13846	0.00280985	UP		protein coding		DOWN
chr2:115918904..115918922,-	p1@LOC389023	AC066593.1	ENSG00000235026.5	4.57976	0.588446	0.0480712	UP		antisense	NA	NA	NA	NA
chr3:149292578..149292582,-	p@chr3:149292578..149292582,-	WWTR1	NA	4.57969	0.594229	5.6224e-05	UP	ON	protein coding gene body
chr20:10204941..10204942,+	p@chr20:10204941..10204942,+	SNAP25	NA	4.57681	0.480178	0.00522784	UP	ON	protein coding gene body	UP
chr4:106473768..106473804,+	p1@ARHGEF38	ARHGEF38	ENSG00000236699.8	4.5761	1.30812	0.023077	UP		protein coding		DOWN		OFF
chr11:25475143..25475149,+	p@chr11:25475143..25475149,+		NA	4.57487	0.273234	0.0430546	UP		linc	NA	NA	NA	NA
chr1:172224417..172224440,+	p@chr1:172224417..172224440,+	DNM3	NA	4.57457	0.261987	0.030176	UP	ON	protein coding gene body		DOWN
chr5:1380178..1380183,-	p1@ENST00000504989,p1@uc003jcj.1	RP11-325I22.2	ENSG00000250584.2	4.5733	0.267709	0.0407668	UP		linc	UP	UP	ON	ON
chr20:7391944..7391948,+	p@chr20:7391944..7391948,+		NA	4.57279	0.278877	0.0281963	UP		linc	NA	NA	NA	NA
chr12:117176090..117176112,+	p2@RNFT2	RNFT2	ENSG00000135119.14	4.57176	0.969032	9.69549e-07	UP	ON	protein coding	UP	UP		ON
chr9:100263912..100263988,+	p1@TMOD1	TMOD1	ENSG00000136842.13	4.57174	0.958715	4.46643e-05	UP	ON	protein coding	DOWN	DOWN
chr14:62394403..62394453,+	p@chr14:62394403..62394453,+	CTD-2277K2.1	NA	4.5687	0.621969	0.0020154	UP	ON	linc	NA	NA	NA	NA
chr9:139871948..139871964,+	p1@PTGDS	PTGDS	ENSG00000107317.11	4.56847	2.68179	0.0297681	UP		protein coding	DOWN	DOWN
chr14:86400995..86401031,+	p2@ENST00000557195	CTD-2341M24.1	ENSG00000258733.5	4.56832	0.255163	0.00327815	UP	ON	linc	NA	NA	NA	NA
chr8:94930034..94930089,+	p2@PDP1	PDP1	ENSG00000164951.15	4.56686	3.24229	1.45434e-05	UP		protein coding		UP
chr10:45869652..45869680,+	p1@ALOX5	ALOX5	ENSG00000012779.10	4.56575	1.08649	0.0176747	UP		protein coding	DOWN	DOWN
chr7:37382416..37382436,-	p12@ELMO1	ELMO1	ENSG00000155849.15	4.56517	0.276199	0.035334	UP	ON	protein coding		DOWN
chr3:195538743..195538754,-	p2@MUC4	MUC4	ENSG00000145113.21	4.56433	1.88517	0.0111588	UP		protein coding	UP	UP	ON	ON
chr12:52448338..52448401,+	p7@NR4A1	NR4A1	NA	4.56367	0.252612	0.00584571	UP	ON	protein coding gene body	DOWN	DOWN
chr12:20521429..20521511,+	p@chr12:20521429..20521511,+		NA	4.56095	0.685263	0.0175039	UP	ON	not annotated	NA	NA	NA	NA
chrY:20309692..20309698,+	p1@ACTG1P11	ACTG1P11	ENSG00000229465.1	4.5605	0.269747	0.0265316	UP		pseudogene
chr6:46097805..46097860,+	p2@ENPP4	ENPP4	ENSG00000001561.6	4.55683	2.11985	5.84823e-09	UP		protein coding		DOWN
chr1:224716846..224716914,+	p4@CNIH3	CNIH3	ENSG00000143786.7	4.55669	1.00123	0.0126395	UP		protein coding	UP	UP
chr5:14156841..14156863,+	p@chr5:14156841..14156863,+	TRIO	NA	4.55633	0.267419	0.0356068	UP	ON	protein coding gene body
chr5:108260286..108260322,+	p4@FER	FER	ENSG00000151422.12	4.55609	0.750265	0.00527809	UP	ON	protein coding
chr10:114135952..114136022,+	p1@ACSL5	ACSL5	ENSG00000197142.10	4.55537	3.40551	0.000641538	UP		protein coding		DOWN
chr10:69597932..69597953,-	p3@DNAJC12	DNAJC12	ENSG00000108176.14	4.5551	1.27254	0.000163798	UP	ON	protein coding	UP	UP	ON
chr7:27155133..27155160,+	p1@ENST00000518046	HOXA-AS2	ENSG00000253552.7	4.55462	0.650736	0.00161487	UP	ON	antisense	NA	NA	NA	NA
chr4:91453996..91454005,-	p@chr4:91453996..91454005,-		NA	4.55456	0.788826	0.0383704	UP	ON	not annotated	NA	NA	NA	NA
chr20:44408556..44408563,-	p5@WFDC3	WFDC3	ENSG00000124116.18	4.55445	0.490192	0.00532873	UP	ON	protein coding	UP	UP	ON
chr14:100841675..100841691,-	p1@WARS	WARS	ENSG00000140105.17	4.55211	3.86357	2.33671e-05	UP		protein coding
chrX:154563889..154563966,-	p1@CLIC2	CLIC2	ENSG00000155962.12	4.55017	0.660857	0.0054403	UP	ON	protein coding		DOWN
chr17:57924805..57924810,+	p@chr17:57924805..57924810,+		NA	4.54608	1.43918	9.04246e-08	UP	ON	linc	NA	NA	NA	NA
chr18:64271339..64271357,-	p3@CDH19	CDH19	ENSG00000071991.8	4.54545	0.17068	0.0382212	UP		protein coding	DOWN	DOWN	OFF	OFF
chr11:76917955..76917963,+	p@chr11:76917955..76917963,+	MYO7A	NA	4.54535	0.234666	0.0176747	UP	ON	protein coding gene body	UP	UP
chr1:158985457..158985468,+	p12@IFI16	IFI16	ENSG00000163565.18	4.54498	0.265988	0.0150076	UP	ON	protein coding		UP
chr10:43187153..43187192,-	p1@ENST00000411439	AL022344.4	ENSG00000233515.1	4.54477	0.125225	0.0333705	UP	ON	linc	UP	UP	ON	ON
chr5:140571902..140571967,+	p1@PCDHB10,p1@PCDHB9	PCDHB10	ENSG00000120324.4	4.54402	0.898804	0.000168738	UP	ON	protein coding
chr19:51471362..51471380,-	p7@KLK6	KLK6	ENSG00000167755.13	4.54101	0.616048	0.0260893	UP	ON	protein coding	UP	UP	ON	ON
chr15:65337716..65337742,+	p1@OSTBETA	SLC51B	ENSG00000186198.3	4.53998	0.253118	0.0433622	UP		protein coding		DOWN	OFF	OFF
chr17:46724136..46724151,-	p5@ENST00000433510	RP11-357H14.17	ENSG00000272763.1	4.53653	0.240211	0.00721387	UP	ON	linc	UP	UP	ON	ON
chr3:115509929..115509954,+	p@chr3:115509929..115509954,+		NA	4.53426	0.629557	0.00080671	UP	ON	lncrna	NA	NA	NA	NA
chr16:81129886..81129900,-	p2@GCSH	GCSH	ENSG00000140905.9	4.53317	0.477994	0.00999435	UP	ON	protein coding	UP	UP	ON
chr11:14665170..14665221,-	p2@PSMA1	PSMA1	ENSG00000129084.17	4.52969	1.79675	0.000545672	UP		protein coding
chr10:8087309..8087356,+	p@chr10:8087309..8087356,+		NA	4.52934	0.184527	0.0209208	UP	ON	protein coding	NA	NA	NA	NA
chr4:89378261..89378338,+	p1@HERC5	HERC5	ENSG00000138646.8	4.52909	2.38468	3.37157e-06	UP		protein coding
chr15:50474385..50474404,+	p2@SLC27A2	SLC27A2	ENSG00000140284.10	4.52628	1.73445	5.07165e-07	UP		protein coding	UP
chr19:54494884..54494901,+	p@chr19:54494884..54494901,+		NA	4.52625	0.985793	0.00590242	UP	ON	protein coding	NA	NA	NA	NA
chr20:10199531..10199552,+	p3@SNAP25	SNAP25	ENSG00000132639.12	4.5218	1.95347	0.0305552	UP		protein coding	UP
chr5:75919253..75919269,-	p4@F2RL2	F2RL2	ENSG00000164220.6	4.5214	0.543496	0.0152088	UP	ON	protein coding	UP	UP
chr19:36164281..36164298,+	p@chr19:36164281..36164298,+	UPK1A	NA	4.52096	0.248441	0.0341958	UP		protein coding gene body	UP	UP
chr8:120428678..120428695,+	p1@NOV	NOV	ENSG00000136999.4	4.52063	1.51175	0.000223403	UP	ON	protein coding
chr9:129376201..129376225,+	p1@LMX1B	LMX1B	NA	4.52055	0.727913	0.000759171	UP	ON	protein coding	UP	UP
chr11:67418152..67418213,-	p1@ACY3	ACY3	ENSG00000132744.7	4.5132	0.222167	0.0091055	UP	ON	protein coding	UP	UP
chr7:131241361..131241398,-	p1@PODXL	PODXL	ENSG00000128567.16	4.51311	4.87198	7.01897e-05	UP		protein coding		DOWN
chr3:157824001..157824078,-	p2@SHOX2	SHOX2	ENSG00000168779.19	4.5126	0.235532	0.0162079	UP	ON	protein coding	UP	UP	ON	ON
chr11:70217585..70217629,-	p@chr11:70217585..70217629,-		NA	4.51239	0.217392	0.000183839	UP	ON	lncrna	NA	NA	NA	NA
chr1:76081808..76081862,-	p1@SLC44A5		NA	4.51226	0.214085	0.0201995	UP	ON	protein coding	NA	NA	NA	NA
chr22:37212959..37212960,-	p@chr22:37212959..37212960,-	PVALB	ENSG00000100362.12	4.51204	0.192899	0.0403382	UP	ON	protein coding			OFF	OFF
chr1:89358212..89358217,-	p@chr1:89358212..89358217,-		NA	4.51114	0.219739	0.000532604	UP	ON	protein coding	NA	NA	NA	NA
chr22:30653345..30653353,-	p@chr22:30653345..30653353,-		NA	4.51047	0.225685	0.00257142	UP	ON	protein coding	NA	NA	NA	NA
chr5:35230569..35230602,-	p1@PRLR	PRLR	ENSG00000113494.16	4.51005	0.218383	0.0264702	UP	ON	protein coding	UP	UP	ON
chr8:133772908..133772919,-	p5@TMEM71	TMEM71	ENSG00000165071.14	4.5096	0.204319	0.0230826	UP	ON	protein coding
chr7:82073044..82073065,-	p4@CACNA2D1	CACNA2D1	ENSG00000153956.15	4.50883	0.872642	0.000284024	UP	ON	protein coding		UP
chr21:46348626..46348651,-	p6@ITGB2	ITGB2	ENSG00000160255.16	4.50849	0.675492	0.0332706	UP	ON	protein coding		DOWN
chr10:112404132..112404145,+	p4@RBM20	RBM20	ENSG00000203867.7	4.50716	0.194833	0.0336817	UP	ON	protein coding
chr4:159131661..159131687,+	p2@TMEM144	TMEM144	ENSG00000164124.10	4.50688	1.72023	5.6224e-05	UP		protein coding
chr17:54671047..54671075,+	p1@NOG	NOG	ENSG00000183691.4	4.50652	1.87226	0.00380209	UP		protein coding			OFF	OFF
chr8:23700304..23700316,-	p7@STC1	STC1	NA	4.50631	0.780232	0.0089452	UP		protein coding gene body
chr6:56311952..56311957,-	p@chr6:56311952..56311957,-		NA	4.50579	0.231221	0.00539584	UP	ON	not annotated	NA	NA	NA	NA
chr12:71833569..71833588,+	p1@LGR5	LGR5	ENSG00000139292.12	4.50545	1.05925	0.0113828	UP		protein coding		UP	OFF	OFF
chr3:195538787..195538810,-	p1@MUC4	MUC4	ENSG00000145113.21	4.50411	4.20843	0.0155777	UP		protein coding	UP	UP	ON	ON
chr8:60031809..60031835,-	p4@TOX	TOX	ENSG00000198846.5	4.50251	0.867619	0.00827302	UP		protein coding		DOWN		ON
chr9:140351903..140351920,-	p6@NELF	NSMF		4.5016	1.28714	0.0414601	UP		protein coding	NA	NA	NA	NA
chr8:90377870..90377874,-	p@chr8:90377870..90377874,-		NA	4.50058	0.215362	0.000587743	UP	ON	not annotated	NA	NA	NA	NA
chr5:43040003..43040051,-	p1@AB463523	ANXA2R	ENSG00000177721.4	4.49837	2.00067	8.27029e-06	UP		protein coding gene body
chr17:46724108..46724134,-	p6@ENST00000433510	RP11-357H14.17	ENSG00000272763.1	4.49772	0.21392	0.00300312	UP	ON	linc	UP	UP	ON	ON
chr17:21515861..21515864,-	p@chr17:21515861..21515864,-		NA	4.4976	0.236762	0.0487852	UP		linc	NA	NA	NA	NA
chr5:14156944..14156964,+	p@chr5:14156944..14156964,+	TRIO	NA	4.49649	0.222199	0.00338379	UP	ON	protein coding gene body
chr8:115758800..115758802,+	p@chr8:115758800..115758802,+		NA	4.49459	0.184907	0.0080889	UP	ON	not annotated	NA	NA	NA	NA
chr18:56193191..56193193,-	p@chr18:56193191..56193193,-	ALPK2		4.49421	0.191672	0.0269768	UP	ON	protein coding gene body	UP	UP	ON
chr2:75822927..75822949,-	p@chr2:75822927..75822949,-		NA	4.49401	0.193834	0.0375991	UP	ON	not annotated	NA	NA	NA	NA
chr14:69726864..69726916,+	p1@GALNTL1	GALNT16	ENSG00000100626.16	4.49329	1.3094	0.0227295	UP		protein coding	NA	NA	NA	NA
chr14:36983073..36983089,-	p4@SFTA3	SFTA3	ENSG00000229415.9	4.49285	0.203604	0.045052	UP	ON	protein coding		DOWN		OFF
chr2:45166354..45166379,-	p1@ENST00000437916	RP11-89K21.1	ENSG00000259439.2	4.49262	0.200222	0.00191352	UP	ON	linc	UP	UP	ON	ON
chr4:141075240..141075269,-	p2@MAML3	MAML3	ENSG00000196782.12	4.49199	1.42489	3.77949e-05	UP		protein coding
chr16:10653240..10653277,-	p6@EMP2	EMP2	ENSG00000213853.9	4.48946	0.204969	0.0267707	UP	ON	protein coding	DOWN	DOWN
chr1:21978312..21978363,-	p3@RAP1GAP	RAP1GAP	ENSG00000076864.19	4.48843	1.07512	0.0138993	UP	ON	protein coding		DOWN
chr6:74104542..74104559,+	p1@DDX43	DDX43	ENSG00000080007.7	4.48578	1.57737	0.000497765	UP		protein coding			OFF	OFF
chr1:54665916..54665927,+	p2@MRPL37	MRPL37	ENSG00000116221.15	4.48276	2.42027	0.00199266	UP		protein coding		UP
chr12:1919491..1919507,+	p@chr12:1919491..1919507,+		NA	4.48261	0.246541	0.026027	UP		lncrna	NA	NA	NA	NA
chr8:19459708..19459747,-	p2@CSGALNACT1	CSGALNACT1	ENSG00000147408.14	4.48163	0.900957	0.0300741	UP		protein coding		DOWN
chr7:27190547..27190591,-	p1@HOXA6	HOXA6	ENSG00000106006.6	4.4809	1.48684	3.58752e-05	UP	ON	protein coding			OFF	OFF
chr7:121944948..121944985,+	p1@ENST00000437317	FEZF1-AS1	ENSG00000230316.6	4.48082	0.217751	0.0067422	UP	ON	antisense	NA	NA	NA	NA
chr1:223853388..223853408,-	p1@CAPN8	CAPN8	ENSG00000203697.11	4.48024	1.26321	0.00492768	UP		protein coding	UP	DOWN		OFF
chr4:189376725..189376740,+	p1@LOC401164	LINC01060	ENSG00000249378.5	4.47988	0.654832	0.0131142	UP	ON	linc	NA	NA	NA	NA
chr1:145277311..145277353,+	p@chr1:145277311..145277353,+	NOTCH2NL	NA	4.47719	2.54977	0.00792793	UP		protein coding gene body
chr17:73087573..73087587,+	p@chr17:73087573..73087587,+	SLC16A5	NA	4.4768	0.208657	0.0175798	UP	ON	protein coding gene body		DOWN
chr12:118797475..118797527,-	p3@TAOK3	TAOK3	ENSG00000135090.13	4.47605	1.61626	0.000229239	UP		protein coding
chr7:32110594..32110649,-	p2@PDE1C	PDE1C	ENSG00000154678.16	4.47469	0.232934	0.0283417	UP		protein coding	DOWN	DOWN		OFF
chr16:19429197..19429221,+	p1@TMC5	TMC5	ENSG00000103534.16	4.47247	2.1288	0.0489553	UP		protein coding	UP	DOWN
chr17:67411378..67411399,+	p@chr17:67411378..67411399,+	MAP2K6	ENSG00000108984.13	4.47122	0.217758	0.0491249	UP		protein coding	UP	UP
chr13:113841579..113841679,-	p2@PCID2	PCID2	ENSG00000126226.21	4.47095	1.09439	0.000176839	UP		protein coding
chr13:37248149..37248196,+	p1@SERTM1	SERTM1	ENSG00000180440.3	4.47057	0.587041	0.0342586	UP	ON	protein coding	DOWN	DOWN	OFF	OFF
chr6:55740381..55740398,-	p1@BMP5	BMP5	ENSG00000112175.7	4.46848	0.568206	0.00936217	UP	ON	protein coding		DOWN		OFF
chr7:112063192..112063237,+	p2@IFRD1	IFRD1	ENSG00000006652.13	4.46769	1.99874	3.56463e-06	UP		protein coding
chr18:7117785..7117811,-	p1@LAMA1	LAMA1	ENSG00000101680.13	4.46682	2.55563	0.0286812	UP		protein coding	UP	UP		ON
chr18:8707629..8707682,-	p@chr18:8707629..8707682,-	RP11-674N23.1	ENSG00000265962.1	4.46674	0.896606	0.000995593	UP	ON	antisense		UP		ON
chr12:14720648..14720822,-	p1@PLBD1	PLBD1	ENSG00000121316.10	4.46656	4.02436	0.000311	UP		protein coding
chr22:50117906..50117953,+	p@chr22:50117906..50117953,+		NA	4.46531	0.164338	0.0313874	UP		linc	NA	NA	NA	NA
chr7:96635700..96635737,-	p@chr7:96635700..96635737,-	DLX6-AS2	NA	4.4615	0.196397	0.0234026	UP	ON	antisense	NA	NA	NA	NA
chr6:62996066..62996137,-	p1@KHDRBS2	KHDRBS2	ENSG00000112232.8	4.45973	0.425375	0.00963141	UP	ON	protein coding	DOWN	DOWN	OFF	OFF
chr14:105953526..105953541,+	p1@CRIP1	CRIP1	ENSG00000213145.9	4.45937	6.95425	0.000122142	UP		protein coding		DOWN
chr2:36597358..36597362,+	p@chr2:36597358..36597362,+	CRIM1	NA	4.4589	0.883031	0.000336734	UP	ON	protein coding gene body	DOWN	DOWN
chr4:110723252..110723291,-	p2@CFI	CFI	ENSG00000205403.12	4.4585	1.14021	0.0104089	UP		protein coding		DOWN
chr14:38036271..38036301,-	p1@ENST00000556024	RP11-356O9.2	ENSG00000259087.5	4.45781	0.247337	0.0335028	UP		linc	NA	NA	NA	NA
chr19:43244610..43244652,-	p1@PSG3	PSG3	ENSG00000221826.9	4.45702	0.20256	0.0272678	UP		protein coding	UP	UP	ON	ON
chr15:74494801..74494829,-	p3@STRA6	STRA6	ENSG00000137868.18	4.45522	1.34804	0.00287188	UP	ON	protein coding	UP	UP	ON	ON
chr6:2876650..2876678,-	p1@MGC39372	RP11-420G6.4	ENSG00000230438.6	4.45484	0.188384	0.00850865	UP	ON	linc
chr7:23387369..23387401,-	p4@IGF2BP3	IGF2BP3	ENSG00000136231.13	4.4539	2.70964	4.53206e-05	UP		protein coding	UP	UP
chr3:83280278..83280318,+	p@chr3:83280278..83280318,+		NA	4.45333	0.222057	0.0355974	UP		lncrna	NA	NA	NA	NA
chr3:89156832..89156848,+	p2@EPHA3	EPHA3	ENSG00000044524.10	4.45204	1.12464	0.0201646	UP		protein coding
chr5:140579162..140579209,+	p1@PCDHB11	PCDHB11	ENSG00000197479.6	4.44914	1.34186	8.56458e-05	UP		protein coding		UP	ON
chr16:81551450..81551487,+	p1@AK023945	CMIP	ENSG00000279476.1	4.44872	1.71531	0.0256759	UP		protein coding gene body
chr1:117602077..117602122,-	p1@ENST00000445523	RP11-27K13.3	ENSG00000236137.1	4.44825	0.181961	0.00672601	UP	ON	antisense			ON
chr9:3528664..3528687,+	p@chr9:3528664..3528687,+	RP11-509J21.1	NA	4.44815	0.197362	0.0347057	UP	ON	linc	NA	NA	NA	NA
chr2:207308275..207308295,+	p2@ADAM23	ADAM23	ENSG00000114948.12	4.44814	2.1058	0.00232044	UP		protein coding		UP
chr7:83278322..83278339,-	p6@SEMA3E	SEMA3E	ENSG00000170381.12	4.44812	0.182841	0.0122314	UP	ON	protein coding		DOWN		OFF
chr12:1609659..1609664,+	p4@LOC100292680		NA	4.44712	0.179512	0.0499591	UP	ON	linc	NA	NA	NA	NA
chr1:159046617..159046630,-	p2@AIM2	AIM2	ENSG00000163568.13	4.44624	0.216897	0.0277377	UP	ON	protein coding	UP	UP		ON
chr8:48676790..48676808,-	p@chr8:48676790..48676808,-		NA	4.44617	0.189821	0.000626744	UP	ON	not annotated	NA	NA	NA	NA
chr6:74104591..74104629,+	p3@DDX43	DDX43	ENSG00000080007.7	4.44532	1.68308	0.000616885	UP		protein coding			OFF	OFF
chr3:151484561..151484575,+	p@chr3:151484561..151484575,+		NA	4.44319	4.44067	0.00962242	UP		other	NA	NA	NA	NA
chr1:98520013..98520035,+	p@chr1:98520013..98520035,+		NA	4.44275	0.204274	0.0295337	UP	ON	linc	NA	NA	NA	NA
chr10:72576503..72576516,+	p11@SGPL1	SGPL1		4.44252	0.169743	0.038627	UP		protein coding gene body	UP	UP
chr2:188330328..188330357,-	p8@TFPI	TFPI	NA	4.44252	0.505654	0.000151146	UP	ON	protein coding gene body		DOWN
chr10:91092277..91092294,+	p2@IFIT3	IFIT3	ENSG00000119917.13	4.44249	1.46962	0.00080461	UP		protein coding		DOWN
chr11:31832581..31832601,-	p7@PAX6	PAX6	ENSG00000007372.20	4.43984	0.176181	0.0150903	UP	ON	protein coding	DOWN	UP
chr18:56246139..56246181,-	p2@ALPK2	ALPK2	ENSG00000198796.6	4.43876	0.202022	0.0450341	UP	ON	protein coding	UP	UP	ON
chr1:241520471..241520519,-	p1@RGS7	RGS7	ENSG00000182901.15	4.43704	1.04508	0.0386751	UP		protein coding	UP			OFF
chr20:34195445..34195465,-	p2@FER1L4	FER1L4	ENSG00000088340.15	4.43579	0.182803	0.0278411	UP	ON	pseudogene	UP	UP	ON	ON
chr9:87283430..87283497,+	p5@NTRK2	NTRK2		4.43525	0.142121	0.0347305	UP	ON	protein coding	DOWN	UP
chr1:110334888..110334899,-	p@chr1:110334888..110334899,-		NA	4.43433	0.731595	0.0182751	UP		not annotated	NA	NA	NA	NA
chr1:199901345..199901380,+	p@chr1:199901345..199901380,+		NA	4.43266	0.783108	0.00248611	UP	ON	linc	NA	NA	NA	NA
chr2:26785409..26785477,+	p1@C2orf70	C2orf70	ENSG00000173557.14	4.43245	1.20671	0.000259513	UP		protein coding
chr7:135665663..135665699,+	p@chr7:135665663..135665699,+		NA	4.43219	0.562155	0.00541388	UP	ON	linc	NA	NA	NA	NA
chr11:1799798..1799824,-	p1@ENST00000449749	AC068580.7	ENSG00000230834.1	4.43125	0.616725	0.0158338	UP	ON	linc		UP	ON	ON
chr4:154681108..154681198,-	p1@RNF175	RNF175	ENSG00000145428.14	4.43055	0.609148	0.0335957	UP	ON	protein coding
chr4:81951908..81951935,+	p1@BMP3	BMP3	ENSG00000152785.6	4.43009	0.19412	0.0259691	UP	ON	protein coding				OFF
chr19:51471909..51471917,-	p10@KLK6	KLK6	ENSG00000167755.13	4.43002	0.107175	0.036413	UP		protein coding	UP	UP	ON	ON
chr13:88323609..88323660,+	p@chr13:88323609..88323660,+		NA	4.42965	1.57737	0.00160841	UP		protein coding	NA	NA	NA	NA
chr12:54410664..54410684,+	p1@HOXC4,p1@HOXC5,p1@HOXC6	HOXC4	ENSG00000198353.7	4.42904	1.47132	0.00249975	UP	ON	protein coding	UP	UP
chr11:122916265..122916270,-	p@chr11:122916265..122916270,-		NA	4.42861	0.211158	0.0240703	UP	ON	not annotated	NA	NA	NA	NA
chr7:29846099..29846181,+	p1@WIPF3	WIPF3	ENSG00000122574.10	4.4274	0.907033	0.00519024	UP		protein coding	UP	UP
chr18:32073391..32073409,+	p9@DTNA	DTNA		4.42687	1.04456	0.0343332	UP		protein coding
chr22:32601104..32601159,+	p1@ENST00000434942	RP1-90G24.10	ENSG00000242082.1	4.42675	0.983118	2.29164e-05	UP	ON	antisense			ON	ON
chr12:127256819..127256831,-	p2@LOC387895	LINC00944	ENSG00000256128.5	4.42597	0.205679	0.017341	UP	ON	linc	NA	NA	NA	NA
chr8:36636676..36636688,-	p1@ENST00000519451,p1@ENST00000524132	RP11-962G15.1	ENSG00000253363.5	4.4257	0.191747	0.0497695	UP		linc	NA	NA	NA	NA
chr18:74799217..74799225,+	p@chr18:74799217..74799225,+			4.42317	0.204555	0.0392274	UP		lncrna	NA	NA	NA	NA
chr6:32908792..32908830,-	p1@HLA-DMB	HLA-DMB	ENSG00000242574.8	4.42259	1.08509	0.000139568	UP	ON	protein coding		DOWN
chr22:35834120..35834141,+	p@chr22:35834120..35834141,+		NA	4.42105	0.177612	0.000432462	UP	ON	not annotated	NA	NA	NA	NA
chr10:70863827..70863945,+	p@chr10:70863827..70863945,+	SRGN	NA	4.42092	0.770364	0.0109177	UP	ON	protein coding gene body		DOWN
chr2:29353224..29353251,-	p@chr2:29353224..29353251,-		NA	4.42032	1.95612	0.00174158	UP		lncrna	NA	NA	NA	NA
chr17:61926646..61926678,+	p1@ENST00000463377,p1@ENST00000469014	TCAM1P	ENSG00000240280.6	4.41883	0.589281	0.0107173	UP	ON	pseudogene	UP	UP		ON
chr12:43086143..43086148,+	p@chr12:43086143..43086148,+	RP11-25I15.3	ENSG00000257114.2	4.4183	0.185429	0.0208395	UP	ON	linc			ON	ON
chr13:100638100..100638115,+	p4@ZIC2	ZIC2	ENSG00000043355.10	4.41723	0.531346	0.000414268	UP	ON	protein coding	UP	UP	ON	ON
chr5:179737830..179737831,-	p@chr5:179737830..179737831,-	GFPT2	NA	4.41654	0.166288	0.0335548	UP	ON	protein coding gene body
chr3:22423205..22423225,+	p1@HMGB1P5	HMGB1P5	ENSG00000132967.9	4.4161	1.06562	5.87217e-05	UP	ON	pseudogene
chr4:2420335..2420354,-	p2@ZFYVE28	ZFYVE28	ENSG00000159733.13	4.4158	0.977569	0.000162286	UP		protein coding
chr3:5741033..5741062,-	p@chr3:5741033..5741062,-		NA	4.41571	0.147115	0.0332812	UP	ON	linc	NA	NA	NA	NA
chr6:56558160..56558173,-	p21@DST	DST	ENSG00000151914.18	4.41281	0.545128	0.00108308	UP	ON	protein coding	DOWN
chr12:7592633..7592671,-	p1@ENST00000538078	RP11-157G21.2	ENSG00000255836.1	4.41253	0.76671	0.0012191	UP	ON	pseudogene	UP	UP	ON	ON
chr7:11115216..11115224,+	p@chr7:11115216..11115224,+	PHF14	NA	4.41148	0.157589	9.50012e-05	UP	ON	protein coding gene body
chr14:65290064..65290102,-	p4@SPTB	SPTB	ENSG00000070182.17	4.41117	0.173709	0.0234055	UP	ON	protein coding	UP	UP
chr7:93354655..93354659,+	p@chr7:93354655..93354659,+	GNGT1	NA	4.41026	0.17424	0.00215196	UP	ON	protein coding gene body	UP	UP	ON	ON
chr12:122884525..122884550,-	p3@CLIP1	CLIP1	ENSG00000130779.19	4.40951	2.1144	1.13049e-05	UP		protein coding
chr15:78632686..78632701,+	p1@CRABP1	CRABP1	ENSG00000166426.7	4.40882	0.816804	0.0101033	UP		protein coding	UP	UP	ON	ON
chr7:43288941..43288960,+	p4@HECW1	HECW1	ENSG00000002746.14	4.40782	1.00167	0.00226763	UP	ON	protein coding	UP	UP	ON
chr8:121824081..121824115,-	p4@SNTB1	SNTB1	ENSG00000172164.13	4.4078	1.19124	0.00160412	UP		protein coding		DOWN
chr7:93690316..93690375,+	p1@ENST00000438538	AC003092.1	ENSG00000236453.5	4.40766	1.51551	0.0223513	UP		linc	NA	NA	NA	NA
chr22:44577210..44577236,+	p2@PARVG	PARVG	ENSG00000138964.16	4.40636	0.213415	0.0381872	UP		protein coding		DOWN
chr21:32931362..32931384,-	p2@TIAM1	TIAM1	ENSG00000156299.12	4.40625	1.28541	3.35071e-05	UP	ON	protein coding
chr7:81400148..81400151,+	p@chr7:81400148..81400151,+		NA	4.40344	0.201844	0.0312332	UP		not annotated	NA	NA	NA	NA
chr6:29404662..29404683,+	p@chr6:29404662..29404683,+		NA	4.40024	0.145301	0.0491854	UP	ON	not annotated	NA	NA	NA	NA
chr10:61900474..61900503,-	p12@ANK3	ANK3	ENSG00000151150.20	4.39969	0.809312	0.00154977	UP	ON	protein coding
chr2:225811803..225811825,-	p5@DOCK10	DOCK10	ENSG00000135905.18	4.39941	0.204806	0.0270833	UP		protein coding		DOWN
chr4:182470598..182470603,+	p@chr4:182470598..182470603,+		NA	4.39806	0.903844	0.00716448	UP		not annotated	NA	NA	NA	NA
chr5:100238956..100238994,-	p1@ST8SIA4	ST8SIA4	ENSG00000113532.12	4.39739	2.50649	0.000376011	UP		protein coding
chr9:79521006..79521040,-	p1@PRUNE2	PRUNE2	ENSG00000106772.17	4.39709	0.604376	0.0282109	UP	ON	protein coding		DOWN
chr1:236046960..236047018,-	p3@LYST	LYST	ENSG00000143669.13	4.39697	0.174271	0.0146078	UP	ON	protein coding
chr12:122884553..122884603,-	p6@CLIP1	CLIP1	ENSG00000130779.19	4.39373	1.28638	9.1857e-06	UP	ON	protein coding
chr4:188593907..188593912,-	p1@ENST00000507817	RP11-565A3.2	ENSG00000250590.5	4.39214	0.163073	0.0499524	UP	ON	linc	NA	NA	NA	NA
chr7:35293685..35293718,-	p1@TBX20	TBX20	ENSG00000164532.10	4.39145	1.21931	0.0156942	UP		protein coding	UP	UP	ON	ON
chr2:237077022..237077038,-	p1@GBX2	GBX2	ENSG00000168505.6	4.38919	0.15277	0.0145817	UP	ON	protein coding	UP	UP	ON	ON
chr10:4801681..4801685,-	p@chr10:4801681..4801685,-		NA	4.38893	0.63198	0.0118347	UP	ON	not annotated	NA	NA	NA	NA
chr5:81684648..81684651,+	p@chr5:81684648..81684651,+		NA	4.38874	0.168037	0.00497547	UP	ON	not annotated	NA	NA	NA	NA
chr19:17516449..17516463,-	p2@BST2	BST2	ENSG00000130303.12	4.38687	0.174436	0.00584386	UP	ON	protein coding
chr6:46097776..46097804,+	p1@ENPP4	ENPP4	ENSG00000001561.6	4.3858	2.32439	8.98168e-10	UP		protein coding		DOWN
chr15:56757233..56757314,-	p1@MNS1	MNS1	ENSG00000138587.5	4.38527	2.39794	4.73489e-11	UP		protein coding
chr1:94146076..94146089,+	p@chr1:94146076..94146089,+		NA	4.38432	0.970603	0.0032178	UP	ON	not annotated	NA	NA	NA	NA
chr18:60985336..60985466,-	p3@BCL2	BCL2		4.38413	0.0340089	0.047606	UP	ON	protein coding gene body
chr13:100632825..100632879,-	p@chr13:100632825..100632879,-		NA	4.38351	0.172726	5.99751e-05	UP	ON	protein coding	NA	NA	NA	NA
chr10:23216944..23217002,+	p1@ARMC3	ARMC3	ENSG00000165309.13	4.3824	0.888535	0.000179879	UP	ON	protein coding	DOWN	DOWN
chr16:19429231..19429243,+	p6@TMC5	TMC5	ENSG00000103534.16	4.38211	1.13915	0.0441018	UP		protein coding	UP	DOWN
chr1:217262933..217262968,-	p3@ESRRG	ESRRG	ENSG00000196482.16	4.38146	0.120373	0.0332734	UP	ON	protein coding			OFF	OFF
chr7:100171446..100171484,-	p2@uc003uvh.2	SAP25	ENSG00000205307.11	4.38103	0.149412	0.04088	UP		protein coding	NA	NA	NA	NA
chr11:123325116..123325128,+	p4@ENST00000525757,p4@uc001pyv.1	LINC01059	ENSG00000023171.14	4.3805	0.169992	0.00854807	UP	ON	linc	NA	NA	NA	NA
chr7:14026022..14026044,-	p7@ETV1	ETV1	ENSG00000006468.13	4.3805	0.592167	0.0266423	UP	ON	protein coding	DOWN	DOWN
chr19:54385439..54385490,+	p1@PRKCG	PRKCG	ENSG00000126583.10	4.38019	0.133967	0.0100719	UP	ON	protein coding	UP	UP	ON	ON
chr5:58543864..58543868,-	p@chr5:58543864..58543868,-	PDE4D	NA	4.37972	1.16928	0.000495721	UP		protein coding gene body		DOWN
chr16:67430199..67430237,-	p@chr16:67430199..67430237,-	ZDHHC1	ENSG00000159714.10	4.37944	0.145236	0.0136681	UP	ON	protein coding
chr15:50086217..50086255,+	p1@ENST00000558657	CTD-2647E9.1	ENSG00000259388.1	4.37836	0.66314	0.0267707	UP	ON	pseudogene	NA	NA
chr3:133429736..133429743,+	p@chr3:133429736..133429743,+	TFP1	NA	4.37419	0.157404	0.00413397	UP	ON	pseudogene	NA	NA	NA	NA
chr20:11873153..11873185,+	p6@BTBD3	BTBD3	ENSG00000132640.14	4.37351	0.159894	0.0141627	UP	ON	protein coding
chr1:79115503..79115530,+	p1@IFI44	IFI44	ENSG00000137965.10	4.37346	4.20909	1.43635e-05	UP		protein coding
chr8:55471739..55471763,+	p2@RP1	RP11-53M11.3	ENSG00000254142.2	4.37329	0.782951	0.0268897	UP		linc			ON	ON
chr5:142359457..142359470,+	p@chr5:142359457..142359470,+	ARHGAP26	NA	4.37324	2.13628	0.0137388	UP		protein coding gene body
chr14:67708401..67708416,+	p9@MPP5	MPP5	ENSG00000072415.8	4.36853	0.157383	0.00500748	UP	ON	protein coding
chr5:45696397..45696427,-	p2@HCN1	HCN1	ENSG00000164588.5	4.36824	0.17968	0.0391486	UP		protein coding	UP
chr8:43094657..43094703,+	p@chr8:43094657..43094703,+		NA	4.36797	0.164169	0.0294915	UP		linc	NA	NA	NA	NA
chr8:128807988..128808015,+	p3@PVT1	PVT1	ENSG00000249859.7	4.36717	0.541931	0.00302442	UP	ON	lncrna	UP	UP
chr20:8112900..8112925,+	p1@PLCB1	PLCB1	ENSG00000182621.16	4.36711	3.08529	8.4023e-05	UP		protein coding
chr12:117900035..117900043,-	p@chr12:117900035..117900043,-	KSR2	NA	4.3659	0.13588	0.0149306	UP	ON	protein coding gene body				OFF
chr17:74137321..74137337,-	p1@FOXJ1	FOXJ1	ENSG00000129654.7	4.36438	0.711483	0.0255074	UP	ON	protein coding		DOWN	ON
chr14:103587794..103587823,+	p@chr14:103587794..103587823,+		NA	4.36325	0.595932	0.0060131	UP	ON	other	NA	NA	NA	NA
chr2:112463437..112463455,-	p@chr2:112463437..112463455,-			4.36321	0.177883	0.0298248	UP	ON	linc	NA	NA	NA	NA
chr5:92899690..92899725,-	p@chr5:92899690..92899725,-	NR2F1-AS1	NA	4.36236	0.553185	0.000878204	UP	ON	lncrna	NA	NA	NA	NA
chr17:73606957..73607009,+	p5@MYO15B	MYO15B		4.36038	0.171374	0.040687	UP	ON	protein coding
chr4:110723142..110723181,-	p1@CFI	CFI	ENSG00000205403.12	4.35973	1.11233	0.00646026	UP		protein coding		DOWN
chr15:23810812..23810828,+	p1@MKRN3	MKRN3	ENSG00000179455.7	4.35824	1.71923	0.00150341	UP		protein coding	UP	UP
chr13:109828922..109828926,-	p@chr13:109828922..109828926,-	MYO16-AS1	NA	4.35664	0.801245	0.00269177	UP	ON	antisense	NA	NA	NA	NA
chr12:21815245..21815251,+	p1@ENST00000541860	RP11-59N23.3	ENSG00000256615.1	4.35574	3.53375	0.000100288	UP		antisense		DOWN
chrX:41213614..41213617,+	p@chrX:41213614..41213617,+	DDX3X	NA	4.35555	0.160998	0.00603741	UP	ON	protein coding gene body
chr5:16508921..16508942,-	p3@FAM134B	FAM134B	ENSG00000154153.13	4.35474	0.162117	0.0439662	UP		protein coding	DOWN	DOWN
chr1:228871187..228871205,+	p2@RHOU	RHOU	ENSG00000116574.5	4.35438	0.506036	0.00379105	UP	ON	protein coding		DOWN
chr11:129952947..129952951,+	p@chr11:129952947..129952951,+	APLP2	NA	4.35259	0.141029	0.000276985	UP	ON	protein coding gene body
chr2:177053252..177053307,-	p1@ENST00000417086,p1@ENST00000452365	HOXD-AS1	ENSG00000224189.6	4.35236	2.1908	2.79938e-05	UP		antisense	NA	NA	NA	NA
chr12:104682667..104682713,+	p2@TXNRD1	TXNRD1	ENSG00000198431.15	4.35139	5.31617	1.16749e-13	UP		protein coding	UP	UP
chr3:114343768..114343822,-	p1@ZBTB20	ZBTB20	ENSG00000181722.15	4.35132	2.50967	5.1176e-06	UP	ON	protein coding
chr17:64766837..64766855,+	p@chr17:64766837..64766855,+	PRKCA	NA	4.35114	0.541872	0.00933457	UP	ON	protein coding gene body
chr19:38308139..38308162,+	p1@LOC644554	CTD-2554C21.2	ENSG00000267640.5	4.35094	0.184145	0.0251482	UP	ON	linc	NA	NA	NA	NA
chr6:121702579..121702585,+	p1@ENST00000407291	RP1-276J11.2	ENSG00000220447.1	4.35054	0.144206	0.0209411	UP	ON	pseudogene	NA	NA
chr20:11898507..11898553,+	p2@BTBD3	BTBD3	ENSG00000132640.14	4.35046	2.1914	0.00495544	UP		protein coding
chr9:102584128..102584144,+	p3@NR4A3	NR4A3	ENSG00000119508.17	4.35	1.17733	1.89955e-06	UP	ON	protein coding	DOWN	DOWN
chr1:153518270..153518290,-	p1@S100A4	S100A4	ENSG00000196154.11	4.34927	6.50297	1.19069e-05	UP		protein coding		DOWN
chr17:9739727..9739738,+	p11@GLP2R	GLP2R	NA	4.34851	0.160013	0.0454608	UP		protein coding		DOWN	OFF	OFF
chr3:31099711..31099712,-	p@chr3:31099711..31099712,-		NA	4.34673	0.106489	0.0262939	UP	ON	not annotated	NA	NA	NA	NA
chr2:196933548..196933601,-	p1@DNAH7	DNAH7	ENSG00000118997.13	4.34578	1.1759	8.05743e-07	UP		protein coding	DOWN	DOWN		OFF
chr2:174562443..174562467,+	p@chr2:174562443..174562467,+		NA	4.34471	0.895873	4.11114e-07	UP	ON	other	NA	NA	NA	NA
chr19:47693677..47693693,+	p@chr19:47693677..47693693,+	SAE1	NA	4.34448	0.0784303	0.0304309	UP	ON	protein coding gene body
chr9:74764278..74764289,+	p4@GDA	GDA	ENSG00000119125.16	4.34367	0.833839	0.0175193	UP		protein coding	UP	UP
chr15:31521567..31521649,-	p1@ENST00000558109,p1@ENST00000559853,p1@ENST00000560812	RP11-16E12.2	ENSG00000259772.6	4.34306	0.482832	0.0146101	UP	ON	linc	NA	NA	NA	NA
chr10:99600200..99600213,+	p@chr10:99600200..99600213,+		NA	4.34104	0.142015	0.014987	UP	ON	protein coding	NA	NA	NA	NA
chr2:145780767..145780811,+	p1@ENST00000420472	TEX41	ENSG00000226674.8	4.34071	0.148497	0.0356068	UP		linc	NA	NA	NA	NA
chr13:36429819..36429826,-	p12@DCLK1	DCLK1		4.34026	0.127489	0.0429467	UP		protein coding	UP
chr1:145277406..145277436,+	p@chr1:145277406..145277436,+	NOTCH2NL	NA	4.33945	2.33674	0.00523512	UP		protein coding gene body
chr10:101690855..101690861,-	p14@DNMBP	DNMBP		4.33677	0.128885	0.0263449	UP	ON	protein coding
chr12:54380404..54380433,+	p3@HOXC10	HOXC10	ENSG00000180818.4	4.33631	0.129619	0.0390818	UP		protein coding	UP	UP		ON
chr10:96305610..96305620,+	p3@HELLS	HELLS	ENSG00000119969.14	4.33586	0.148766	0.000108772	UP	ON	protein coding	UP	UP
chr6:100061760..100061774,+	p2@PRDM13	PRDM13	NA	4.33585	0.132826	0.0204883	UP	ON	protein coding gene body	UP	UP	ON	ON
chr12:9602384..9602388,-	p@chr12:9602384..9602388,-		NA	4.33514	0.167561	0.0135524	UP	ON	not annotated	NA	NA	NA	NA
chr10:112404196..112404221,+	p1@RBM20	RBM20	ENSG00000203867.7	4.33389	0.112747	0.0162097	UP	ON	protein coding
chr19:46477244..46477302,-	p@chr19:46477244..46477302,-	NOVA2	ENSG00000104967.6	4.33249	0.0751717	0.0381996	UP	ON	protein coding	DOWN	DOWN	ON	ON
chr7:73038839..73038862,-	p1@MLXIPL	MLXIPL	ENSG00000009950.15	4.32933	1.41372	3.84536e-05	UP		protein coding
chr22:29108004..29108032,-	p5@CHEK2	CHEK2		4.32901	0.157599	0.0348834	UP	ON	protein coding	UP	UP
chr19:22398550..22398579,-	p1@ZNF676		ENSG00000282732.1	4.32775	1.2534	0.0131822	UP		other	NA	NA	NA	NA
chr5:158526917..158526932,-	p1@EBF1	EBF1	ENSG00000164330.16	4.32559	0.539573	0.00483844	UP	ON	protein coding		DOWN
chr9:17579057..17579074,+	p2@SH3GL2	SH3GL2	ENSG00000107295.9	4.32539	0.345565	0.0366615	UP	ON	protein coding	DOWN	DOWN	OFF	OFF
chr7:27224068..27224083,+	p3@HOXA11-AS1	HOXA11-AS	ENSG00000240990.9	4.32483	0.140875	0.00363439	UP	ON	antisense	NA	NA	NA	NA
chr5:31193847..31193887,+	p1@CDH6	CDH6	ENSG00000113361.12	4.324	3.2426	0.00721194	UP		protein coding
chr1:39874729..39874759,+	p1@KIAA0754	MACF1	ENSG00000127603.23	4.32396	4.21105	4.96925e-09	UP		protein coding gene body		DOWN
chr7:134233840..134233871,+	p1@AKR1B15	AKR1B15	ENSG00000227471.8	4.32299	0.829967	0.0103631	UP		protein coding	UP	UP	ON	ON
chr7:84816122..84816189,-	p1@SEMA3D	SEMA3D	ENSG00000153993.13	4.32263	1.46868	0.00534764	UP		protein coding	DOWN			ON
chr2:188330402..188330457,-	p7@TFPI	TFPI	NA	4.32195	0.505091	0.000183839	UP	ON	protein coding gene body		DOWN
chr9:5231413..5231425,+	p1@INSL4	INSL4	ENSG00000120211.4	4.32192	1.52218	0.0163318	UP		protein coding	UP	UP	ON	ON
chr1:94520868..94520897,-	p@chr1:94520868..94520897,-	ABCA4	NA	4.32061	0.162912	0.0327265	UP		protein coding gene body	UP	UP
chr1:203096831..203096864,+	p2@ADORA1	ADORA1	ENSG00000163485.15	4.32039	1.37716	0.00590242	UP		protein coding	UP
chr3:33700589..33700607,-	p2@CLASP2	CLASP2	ENSG00000163539.16	4.3201	0.667024	0.00559146	UP		protein coding
chr4:28829856..28829859,+	p@chr4:28829856..28829859,+		NA	4.31798	0.0994497	0.0229359	UP	ON	not annotated	NA	NA	NA	NA
chr13:28543285..28543314,-	p2@CDX2	CDX2	NA	4.31408	0.456374	0.0153223	UP	ON	protein coding	UP	UP	ON	ON
chr17:76356493..76356509,+	p@chr17:76356493..76356509,+	RP11-806H10.4	ENSG00000266970.1	4.31263	0.140008	0.0107346	UP	ON	linc	UP		ON
chr8:23699989..23700003,-	p2@STC1	STC1	NA	4.31223	4.34368	0.00349921	UP		protein coding gene body
chr15:65598581..65598584,+	p@chr15:65598581..65598584,+		NA	4.30952	0.632025	0.0148395	UP	ON	not annotated	NA	NA	NA	NA
chr10:31815853..31815867,+	p@chr10:31815853..31815867,+	ZEB1	NA	4.30906	0.131908	0.00400413	UP	ON	protein coding gene body	DOWN	DOWN
chr19:43383856..43383876,-	p1@PSG1	PSG1	ENSG00000231924.9	4.30858	0.421953	0.00417315	UP	ON	protein coding	UP	UP	ON	ON
chr2:154728427..154728440,+	p1@GALNT13	GALNT13	ENSG00000144278.14	4.30823	2.31122	0.000404335	UP		protein coding	DOWN		OFF
chr17:66287663..66287684,+	p2@ARSG	ARSG	ENSG00000141337.12	4.30797	0.448052	1.09767e-05	UP	ON	protein coding
chr12:21679347..21679359,+	p5@C12orf39	C12orf39	ENSG00000134548.9	4.3078	0.151073	0.0426739	UP		protein coding	UP		OFF	OFF
chr17:43045651..43045694,-	p1@C1QL1	C1QL1	ENSG00000131094.3	4.3075	1.30706	0.000424325	UP		protein coding	UP	UP		ON
chr17:46621146..46621180,-	p10@HOXB2	HOXB2	ENSG00000173917.10	4.30672	0.707631	0.0356911	UP		protein coding	UP	UP
chr19:14444525..14444559,+	p1@uc002myk.2	CTC-548K16.1	ENSG00000267147.2	4.30566	0.133347	0.00368225	UP	ON	linc	UP	UP	ON	ON
chr1:23543975..23544006,-	p@chr1:23543975..23544006,-		NA	4.30532	1.01178	0.00531516	UP	ON	protein coding	NA	NA	NA	NA
chr17:9745823..9745837,+	p4@GLP2R	GLP2R	ENSG00000065325.12	4.30397	0.121216	0.0384112	UP		protein coding		DOWN	OFF	OFF
chr9:123605514..123605528,+	p2@ENST00000442982	PSMD5-AS1	ENSG00000226752.7	4.30386	0.13554	0.000919981	UP	ON	antisense	NA	NA	NA	NA
chr3:115509849..115509867,+	p@chr3:115509849..115509867,+		NA	4.30113	0.132643	0.00345985	UP	ON	lncrna	NA	NA	NA	NA
chr2:36788813..36788831,-	p8@FEZ2	FEZ2	ENSG00000171055.14	4.30088	0.441216	0.00039635	UP	ON	protein coding
chr7:108096770..108096784,-	p2@NRCAM	NRCAM	ENSG00000091129.19	4.29944	0.587803	0.0167034	UP	ON	protein coding		UP
chr11:124632284..124632341,+	p1@ENST00000532579	RP11-677M14.3	ENSG00000250073.2	4.29856	0.125824	0.00710254	UP	ON	antisense	DOWN	DOWN	OFF	OFF
chr1:763033..763058,+	p1@ENST00000441765,p1@ENST00000449005	RP11-206L10.11	ENSG00000228794.8	4.29752	0.0960757	0.0386677	UP	ON	lncrna	NA	NA	NA	NA
chr1:27992931..27992965,-	p@chr1:27992931..27992965,-	IFI6	NA	4.29634	0.15307	0.03871	UP	ON	protein coding gene body
chr20:55841403..55841458,-	p2@BMP7	BMP7	ENSG00000101144.12	4.29608	1.39208	0.0099004	UP		protein coding	UP	UP		ON
chr7:27213284..27213291,-	p@chr7:27213284..27213291,-	HOXA10	NA	4.29466	0.152003	0.0248233	UP	ON	protein coding gene body	UP	UP		ON
chr7:26904144..26904155,-	p5@SKAP2	SKAP2	ENSG00000005020.12	4.29442	0.952796	1.03685e-07	UP	ON	protein coding
chr2:113483649..113483669,+	p2@NT5DC4	NT5DC4		4.29216	0.61794	0.0213243	UP	ON	protein coding	NA	NA	NA	NA
chr2:157186630..157186686,-	p6@NR4A2	NR4A2		4.29104	0.137131	0.0141499	UP	ON	protein coding		DOWN
chr2:71503683..71503748,+	p2@ZNF638	ZNF638	ENSG00000075292.18	4.29102	2.15281	9.06488e-10	UP		protein coding
chr8:73449214..73449261,+	p1@KCNB2	KCNB2		4.29014	0.00303034	0.0494027	UP	ON	protein coding	UP	UP	OFF
chr14:24424288..24424321,-	p3@C14orf167	DHRS4-AS1	NA	4.2901	0.749986	0.00789743	UP		lncrna	NA	NA	NA	NA
chr1:46056374..46056378,+	p@chr1:46056374..46056378,+	NASP	NA	4.28974	0.114427	0.000379609	UP	ON	protein coding gene body		UP
chr10:115511412..115511428,+	p3@C10orf81	PLEKHS1	ENSG00000148735.14	4.28934	0.126149	0.048896	UP	ON	protein coding	NA	NA	NA	NA
chr2:157189617..157189667,-	p4@NR4A2	NR4A2	ENSG00000153234.13	4.28908	0.142067	0.0129948	UP	ON	protein coding		DOWN
chr7:94833874..94833907,+	p@chr7:94833874..94833907,+	PPP1R9A	NA	4.28846	0.480196	4.93946e-05	UP	ON	protein coding gene body		DOWN
chr9:79307096..79307129,-	p2@PRUNE2	PRUNE2	ENSG00000106772.17	4.28837	0.632871	0.0262921	UP	ON	protein coding		DOWN
chrX:127913853..127913854,+	p@chrX:127913853..127913854,+		NA	4.28674	0.103708	0.020869	UP	ON	not annotated	NA	NA	NA	NA
chr2:188415716..188415740,-	p@chr2:188415716..188415740,-	TFPI	NA	4.28636	0.535692	0.0101684	UP	ON	protein coding gene body		DOWN
chr8:23700484..23700506,-	p6@STC1	STC1	NA	4.28592	0.721408	0.00921406	UP		protein coding gene body
chr16:85589318..85589348,+	p@chr16:85589318..85589348,+		NA	4.28502	0.862424	0.000357479	UP	ON	protein coding	NA	NA	NA	NA
chr5:172662230..172662241,-	p3@NKX2-5	NKX2-5	ENSG00000183072.9	4.285	0.146868	0.033171	UP	ON	protein coding	UP	UP	ON	ON
chr2:176957999..176958014,+	p1@AB463753	HOXD13	ENSG00000128714.5	4.28333	0.145994	0.0284674	UP	ON	protein coding	UP	UP	ON	ON
chr7:20257180..20257206,+	p1@ENST00000439058	AC005083.1	ENSG00000233834.6	4.28303	0.497647	0.00562637	UP	ON	lncrna	NA	NA	NA	NA
chr1:169112530..169112531,+	p@chr1:169112530..169112531,+		NA	4.28238	0.126046	0.00474555	UP	ON	not annotated	NA	NA	NA	NA
chr19:49631821..49631855,+	p1@PPFIA3	PPFIA3	ENSG00000177380.13	4.27983	1.85455	0.00011738	UP		protein coding	UP	UP
chr4:66536306..66536345,+	p1@ENST00000507117	RP11-807H7.1	ENSG00000250846.6	4.27968	0.548356	0.0470709	UP	ON	linc	NA	NA	NA	NA
chr1:156627439..156627498,+	p@chr1:156627439..156627498,+	BCAN	NA	4.27902	0.916491	0.0246215	UP		protein coding gene body	UP	UP
chr15:35591787..35591799,-	p1@ENST00000558517	RP11-150L8.4	ENSG00000259585.2	4.27877	0.74833	0.0182045	UP		pseudogene
chr19:6604094..6604121,-	p@chr19:6604094..6604121,-	CD70	ENSG00000125726.10	4.27753	0.118904	0.00787894	UP	ON	protein coding	UP	UP
chr1:207997343..207997405,-	p@chr1:207997343..207997405,-	C1orf132	NA	4.27702	0.118268	0.00300291	UP	ON	lncrna	NA	NA	NA	NA
chr3:149096538..149096558,-	p@chr3:149096538..149096558,-		NA	4.27611	0.120834	0.00233995	UP	ON	protein coding	NA	NA	NA	NA
chr10:114134846..114134867,+	p10@ACSL5	ACSL5	ENSG00000197142.10	4.27366	0.149438	0.0247798	UP	ON	protein coding		DOWN
chr16:30032610..30032629,-	p@chr16:30032610..30032629,-	DOC2A	ENSG00000149927.17	4.27209	1.32345	2.55169e-07	UP		protein coding	UP	UP
chrX:112084099..112084131,-	p2@AMOT	AMOT	ENSG00000126016.13	4.272	1.34294	0.00488115	UP	ON	protein coding
chr8:60031682..60031710,-	p2@TOX	TOX	ENSG00000198846.5	4.27107	0.964276	0.0113194	UP		protein coding		DOWN		ON
chr17:66951474..66951550,-	p1@ABCA8	ABCA8	ENSG00000141338.13	4.26924	1.28465	0.0288796	UP	ON	protein coding	DOWN	DOWN		OFF
chr9:9085941..9085944,+	p@chr9:9085941..9085944,+		NA	4.26676	0.0892665	0.0487221	UP	ON	not annotated	NA	NA	NA	NA
chr18:48086440..48086509,+	p1@MAPK4	MAPK4	ENSG00000141639.11	4.26577	2.47171	0.0374928	UP		protein coding	DOWN	DOWN	OFF	OFF
chr1:45988484..45988500,-	p4@PRDX1	PRDX1	ENSG00000117450.13	4.26496	0.646699	1.51498e-05	UP	ON	protein coding		UP
chr2:103235775..103235794,+	p2@SLC9A2	SLC9A2	ENSG00000115616.2	4.26313	0.119338	0.0266426	UP	ON	protein coding	UP	UP
chr5:82271529..82271542,-	p@chr5:82271529..82271542,-		NA	4.26236	0.119611	0.0334507	UP	ON	linc	NA	NA	NA	NA
chr12:49932805..49932858,+	p1@KCNH3	KCNH3	ENSG00000135519.6	4.26189	0.637993	0.00825994	UP		protein coding
chr3:14088629..14088639,-	p@chr3:14088629..14088639,-		NA	4.25799	0.0783718	0.0455356	UP		lncrna	NA	NA	NA	NA
chr12:54378864..54378884,+	p6@HOXC10	HOXC10	ENSG00000180818.4	4.25797	0.110818	0.00138686	UP	ON	protein coding	UP	UP		ON
chr22:21771656..21771662,+	p1@HIC2	HIC2	ENSG00000169635.9	4.25766	0.376558	0.00869146	UP	ON	protein coding
chr8:75896876..75896894,+	p3@CRISPLD1	CRISPLD1	ENSG00000121005.8	4.25536	0.120615	0.0141938	UP	ON	protein coding	UP	UP	ON	ON
chr2:202563351..202563376,-	p1@MPP4	MPP4		4.25487	0.777953	0.0371672	UP	ON	protein coding		UP
chr1:166944652..166944733,-	p1@ILDR2	ILDR2	ENSG00000143195.12	4.25456	0.0723474	0.017566	UP	ON	protein coding			OFF	OFF
chr10:101089107..101089141,+	p1@CNNM1	CNNM1	ENSG00000119946.10	4.25431	1.05146	0.00227886	UP		protein coding	UP	UP	OFF
chr4:66536143..66536160,-	p3@EPHA5	EPHA5	ENSG00000145242.13	4.25382	0.0694061	0.0374563	UP	ON	protein coding	UP			OFF
chr7:43733695..43733713,-	p@chr7:43733695..43733713,-	COA1	NA	4.25372	0.677181	0.0155242	UP		protein coding gene body	NA	NA	NA	NA
chr7:43733716..43733742,-	p@chr7:43733716..43733742,-	COA1	NA	4.25361	0.803696	0.0159144	UP		protein coding gene body	NA	NA	NA	NA
chr8:22941897..22941933,+	p2@TNFRSF10C	TNFRSF10C	ENSG00000173535.13	4.25212	2.01929	0.000381308	UP		protein coding		DOWN
chr11:121896661..121896676,-	p@chr11:121896661..121896676,-			4.25203	0.131676	0.0485012	UP		linc	NA	NA	NA	NA
chr14:105071083..105071155,-	p1@TMEM179	TMEM179	ENSG00000258986.6	4.25171	0.0962115	0.0461254	UP		protein coding	UP	UP	ON	ON
chr16:87636085..87636144,+	p1@JPH3	JPH3	ENSG00000154118.12	4.2512	0.103862	0.0312462	UP	ON	protein coding	UP	UP
chr2:176972047..176972063,+	p7@HOXD11	HOXD11	ENSG00000128713.12	4.24885	0.330419	0.0285297	UP	ON	protein coding	UP	UP	ON	ON
chr4:819901..819962,-	p1@CPLX1	CPLX1	ENSG00000168993.14	4.24876	2.44609	1.62668e-06	UP		protein coding	UP		ON	ON
chr10:5138199..5138209,+	p@chr10:5138199..5138209,+	AKR1C3	ENSG00000196139.12	4.24851	0.0351271	0.0304151	UP	ON	protein coding	UP	UP
chr12:122502269..122502287,+	p2@ENST00000423999	AC156455.1	ENSG00000256546.1	4.24773	0.49593	0.00834659	UP	ON	lncrna			ON	ON
chr1:98552570..98552605,+	p@chr1:98552570..98552605,+			4.24745	0.0823754	0.0368605	UP	ON	linc	NA	NA	NA	NA
chr16:28996522..28996529,+	p9@LAT	LAT	ENSG00000213658.10	4.24734	0.147556	0.043157	UP		protein coding
chr15:76304731..76304779,-	p1@NRG4	NRG4	ENSG00000169752.16	4.24697	1.7351	0.00151495	UP		protein coding		UP
chr7:12610338..12610355,+	p1@SCIN	SCIN	ENSG00000006747.14	4.2435	1.97513	0.0157794	UP		protein coding	UP
chrX:137793495..137793521,-	p4@FGF13	FGF13	ENSG00000129682.13	4.24301	0.12026	0.0472016	UP		protein coding	UP
chr1:203097407..203097476,+	p1@ADORA1	ADORA1	ENSG00000163485.15	4.24238	1.14404	0.00140769	UP	ON	protein coding	UP
chr11:17410869..17410911,-	p1@KCNJ11	KCNJ11	ENSG00000187486.5	4.24229	0.079943	0.0152971	UP	ON	protein coding
chr2:175462456..175462512,-	p3@WIPF1	WIPF1	ENSG00000115935.16	4.24214	2.68483	0.0257264	UP		protein coding
chr3:181442608..181442615,+	p@chr3:181442608..181442615,+	SOX2-OT	NA	4.24034	0.0850397	0.0365858	UP	ON	lncrna	NA	NA	NA	NA
chr21:22370717..22370738,+	p1@NCAM2	NCAM2	ENSG00000154654.14	4.24031	0.371824	0.0114574	UP	ON	protein coding		DOWN
chr3:128208039..128208096,+	p1@ENST00000464242,p1@ENST00000468377,p1@uc003ekp.2	RP11-475N22.4	ENSG00000244300.2	4.23838	1.89503	6.12849e-06	UP		antisense			OFF	OFF
chr6:125524852..125524861,+	p7@TPD52L1	TPD52L1	ENSG00000111907.20	4.23811	0.923358	0.00463914	UP		protein coding		UP
chr16:71378536..71378548,-	p@chr16:71378536..71378548,-		NA	4.23769	0.0774917	0.0275248	UP	ON	protein coding	NA	NA	NA	NA
chr2:202272227..202272243,-	p@chr2:202272227..202272243,-	TRAK2	NA	4.23695	0.926059	0.00973805	UP		protein coding gene body		DOWN
chr9:93195787..93195800,-	p2@ENST00000436671	RP11-389K14.3	ENSG00000231107.1	4.23689	0.671473	0.000657844	UP	ON	linc				ON
chr16:67198683..67198698,+	p2@HSF4	HSF4	ENSG00000102878.16	4.23632	1.10332	0.00840834	UP		protein coding	UP	UP
chr17:80818231..80818262,+	p@chr17:80818231..80818262,+	TBCD	ENSG00000141556.20	4.23621	0.876231	0.0193125	UP		protein coding
chr6:96463823..96463835,+	p2@FUT9	FUT9	ENSG00000172461.10	4.2359	0.0839109	0.0137968	UP	ON	protein coding	UP	UP	ON	ON
chr8:128909594..128909613,+	p@chr8:128909594..128909613,+	PVT1	NA	4.23426	0.0990161	0.00143506	UP	ON	lncrna	UP	UP
chr17:46690839..46690884,-	p1@HOXB8	HOXB8	ENSG00000120068.6	4.23378	1.57551	0.00556882	UP	ON	protein coding	UP	UP
chr19:44764031..44764072,+	p1@ZNF233	ZNF233	ENSG00000159915.12	4.23159	0.442713	0.000780611	UP	ON	protein coding
chr2:111886197..111886201,+	p@chr2:111886197..111886201,+	BCL2L11	NA	4.23058	0.399111	3.12309e-05	UP	ON	protein coding gene body
chr11:1212843..1212881,+	p2@MUC5AC	MUC5AC	ENSG00000215182.6	4.23005	0.126584	0.0431798	UP		protein coding	NA	NA	NA	NA
chr5:10307849..10307873,-	p3@CMBL	CMBL	ENSG00000164237.8	4.22996	1.14836	0.00142313	UP		protein coding	UP
chr2:99758223..99758246,+	p3@C2orf15,p6@MRPL30	C2orf15	ENSG00000273045.5	4.22816	0.353125	0.00469678	UP	ON	protein coding	UP
chr2:121101283..121101299,+	p@chr2:121101283..121101299,+		NA	4.22441	0.0801168	0.0266166	UP	ON	protein coding	NA	NA	NA	NA
chr10:96327980..96327984,+	p@chr10:96327980..96327984,+	HELLS	NA	4.22421	0.710215	5.96474e-05	UP	ON	protein coding gene body	UP	UP
chr14:56010096..56010099,+	p1@ENST00000483820	RPL7AP4	ENSG00000213641.4	4.22413	0.0979765	0.0222599	UP	ON	pseudogene
chrX:33059434..33059464,+	p2@TBCAP1	TBCAP1	ENSG00000226781.1	4.22369	1.26549	0.00277126	UP		pseudogene				ON
chr13:111522588..111522610,-	p1@LINC00346	LINC00346	ENSG00000255874.2	4.22235	1.22695	4.4622e-06	UP		protein coding	UP		ON	ON
chr10:112404108..112404122,+	p3@RBM20	RBM20	ENSG00000203867.7	4.22227	0.097686	0.0216467	UP	ON	protein coding
chr9:109984515..109984523,+	p@chr9:109984515..109984523,+		NA	4.22204	0.600913	0.000951126	UP	ON	linc	NA	NA	NA	NA
chr21:46424517..46424530,-	p4@LINC00162	LINC00162	ENSG00000275874.1	4.22202	0.127742	0.03945	UP		linc	DOWN		OFF	OFF
chr6:147527126..147527167,+	p3@STXBP5	STXBP5	NA	4.22133	0.257109	0.0171496	UP	ON	protein coding
chr1:147994144..147994148,+	p1@ENST00000391154	RNVU1-13	ENSG00000212456.1	4.2212	3.4684	0.000173708	UP		small ncRNAs	NA	NA	NA	NA
chr3:98700102..98700111,+	p8@ENST00000473756	LINC00973	ENSG00000240476.1	4.22111	0.109153	0.0127408	UP	ON	linc	UP	UP	ON	ON
chr16:84764212..84764225,-	p@chr16:84764212..84764225,-		NA	4.21881	0.0980153	0.00226763	UP	ON	lncrna	NA	NA	NA	NA
chr12:11256776..11256781,-	p@chr12:11256776..11256781,-	PRR4	NA	4.2179	0.875628	1.07452e-05	UP	ON	protein coding gene body	UP	UP		ON
chr20:62124393..62124406,-	p@chr20:62124393..62124406,-	EEF1A2	NA	4.21591	0.105405	0.00866618	UP	ON	protein coding gene body	UP	UP
chr9:11065025..11065049,-	p@chr9:11065025..11065049,-		NA	4.2154	0.0964815	0.0482112	UP	ON	linc	NA	NA	NA	NA
chr3:50712327..50712428,+	p1@MIR4787	MIR4787	ENSG00000272543.1	4.21481	2.37576	2.16789e-05	UP		small ncRNAs	NA	NA
chr13:108302737..108302743,-	p@chr13:108302737..108302743,-	FAM155A	NA	4.21445	0.114056	0.0345735	UP	ON	protein coding gene body		DOWN
chr19:51472780..51472820,-	p3@KLK6	KLK6	ENSG00000167755.13	4.21429	1.84671	0.0106982	UP		protein coding	UP	UP	ON	ON
chr2:200322654..200322707,-	p2@SATB2	SATB2	ENSG00000119042.16	4.2138	1.87471	1.1939e-06	UP		protein coding	UP	UP
chr8:133772870..133772881,-	p2@TMEM71	TMEM71	ENSG00000165071.14	4.21036	0.0862687	0.0276454	UP	ON	protein coding
chr13:76363052..76363077,+	p7@LMO7	LMO7	ENSG00000136153.19	4.20296	1.17246	0.00855473	UP		protein coding	DOWN	DOWN
chr17:42462703..42462743,-	p4@ITGA2B	ITGA2B	ENSG00000005961.17	4.20244	0.0945028	0.00824218	UP	ON	protein coding			OFF
chr2:105469718..105469783,+	p@chr2:105469718..105469783,+	RP11-13J10.1	ENSG00000269707.1	4.20152	0.0861743	0.0394188	UP	ON	lncrna				ON
chr12:31902400..31902413,+	p@chr12:31902400..31902413,+		NA	4.2009	0.106254	0.0483624	UP		pseudogene	NA	NA	NA	NA
chr20:58508817..58508867,+	p2@C20orf177	FAM217B	ENSG00000196227.10	4.20085	0.103237	0.0321079	UP	ON	protein coding	NA	NA	NA	NA
chr1:39670444..39670458,+	p5@MACF1	MACF1	ENSG00000127603.23	4.20063	1.596	0.00627458	UP		protein coding		DOWN
chr21:30565767..30565795,+	p1@LINC00189	LINC00189	ENSG00000215533.8	4.2006	0.118495	0.0408659	UP		lncrna	NA	NA	NA	NA
chr11:65788650..65788665,-	p2@CATSPER1	CATSPER1	ENSG00000175294.5	4.20031	0.760213	0.00321378	UP	ON	protein coding		DOWN		OFF
chr16:66995144..66995184,+	p1@CES3	CES3	ENSG00000172828.12	4.20022	0.456801	0.0019568	UP	ON	protein coding	UP		ON
chr11:65788602..65788644,-	p1@CATSPER1	CATSPER1	ENSG00000175294.5	4.20016	2.43219	0.00229896	UP		protein coding		DOWN		OFF
chr7:134212296..134212311,+	p2@AKR1B10	AKR1B10	ENSG00000198074.9	4.19976	1.87773	0.009375	UP		protein coding	UP	UP	ON	ON
chr6:56716896..56716928,-	p8@DST	DST		4.19905	0.12536	0.0388864	UP	ON	protein coding	DOWN
chr15:90294062..90294079,-	p2@MESP1	MESP1	ENSG00000166823.5	4.19897	0.627451	8.06774e-05	UP	ON	protein coding	UP	UP
chr8:11561684..11561751,+	p1@GATA4	GATA4	ENSG00000136574.17	4.19884	0.919182	0.0339279	UP		protein coding		UP
chr6:90121805..90121858,-	p2@RRAGD	RRAGD	ENSG00000025039.14	4.19834	0.801738	0.000708282	UP	ON	protein coding
chr4:66536221..66536236,-	p4@EPHA5	EPHA5	ENSG00000145242.13	4.19821	0.446413	0.0474128	UP	ON	protein coding	UP			OFF
chr4:118247051..118247056,+	p@chr4:118247051..118247056,+		NA	4.19687	0.46169	0.00441738	UP	ON	linc	NA	NA	NA	NA
chr12:56075512..56075532,+	p1@METTL7B	METTL7B	ENSG00000170439.6	4.19622	1.89614	0.000743747	UP	ON	protein coding	UP			ON
chr19:12941474..12941498,-	p1@RTBDN	RTBDN	ENSG00000132026.13	4.19592	0.0212467	0.0176548	UP	ON	protein coding	UP	UP	ON	ON
chr12:52448213..52448262,+	p6@NR4A1	NR4A1	NA	4.19572	0.381185	0.00229311	UP	ON	protein coding	DOWN	DOWN
chrX:47373251..47373271,-	p1@NUS1P1	NUS1P1	ENSG00000235636.1	4.19376	0.108267	0.0433444	UP		pseudogene
chr15:59730348..59730435,+	p1@FAM81A	FAM81A	ENSG00000157470.11	4.1921	2.87082	1.0454e-07	UP		protein coding	UP		ON	ON
chr17:70417540..70417544,-	p@chr17:70417540..70417544,-	LINC00511	ENSG00000227036.6	4.1906	0.0921307	0.01787	UP	ON	linc	NA	NA	NA	NA
chr11:62104897..62104975,+	p1@ASRGL1	ASRGL1	ENSG00000162174.12	4.19008	2.11846	8.68978e-06	UP		protein coding		DOWN
chr17:46703212..46703238,-	p2@HOXB9	HOXB9	ENSG00000170689.9	4.19	0.842432	0.00218626	UP	ON	protein coding gene body	UP	UP	ON	ON
chr11:125937329..125937360,+	p1@NAP1L1P1	NAP1L1P1	ENSG00000254759.1	4.18765	0.0929385	0.026847	UP	ON	pseudogene			ON	ON
chr19:49713991..49714040,+	p@chr19:49713991..49714040,+	TRPM4	ENSG00000130529.15	4.18719	0.944185	0.0351038	UP		protein coding
chr8:90072511..90072515,-	p@chr8:90072511..90072515,-		NA	4.18671	0.593302	0.00219142	UP		not annotated	NA	NA	NA	NA
chr2:207308092..207308119,+	p6@ADAM23	ADAM23	ENSG00000114948.12	4.18615	0.036176	0.04336	UP	ON	protein coding		UP
chr7:93226477..93226489,+	p@chr7:93226477..93226489,+	GNGT1	NA	4.18604	0.0972275	0.015207	UP	ON	protein coding gene body	UP	UP	ON	ON
chr5:101631964..101632029,-	p1@SLCO4C1	SLCO4C1	ENSG00000173930.8	4.18548	0.645622	0.00165751	UP	ON	protein coding	DOWN	DOWN		ON
chr2:234328000..234328014,+	p3@DGKD	DGKD	ENSG00000077044.9	4.18456	0.486288	0.00123532	UP	ON	protein coding
chr22:22874610..22874616,-	p1@ZNF280A	ZNF280A	ENSG00000169548.3	4.18319	0.0971288	0.0233694	UP	ON	protein coding	UP	UP	ON	ON
chr7:53574034..53574038,+	p@chr7:53574034..53574038,+		NA	4.18265	0.0665792	0.0288056	UP	ON	not annotated	NA	NA	NA	NA
chr17:45608614..45608626,+	p5@NPEPPS	NPEPPS	ENSG00000141279.15	4.1824	0.0593601	0.0324925	UP	ON	protein coding
chr7:29186234..29186261,+	p8@CHN2	CHN2	ENSG00000106069.20	4.18221	0.0989678	0.0413475	UP	ON	protein coding				ON
chr20:62127314..62127345,-	p6@EEF1A2	EEF1A2	NA	4.18079	0.0814018	0.00597126	UP	ON	protein coding gene body	UP	UP
chr2:133028455..133028485,-	p@chr2:133028455..133028485,-		NA	4.18023	0.540398	0.0146101	UP	ON	not annotated	NA	NA	NA	NA
chr10:8096772..8096787,+	p2@GATA3	GATA3	ENSG00000107485.15	4.17963	1.92146	0.0128475	UP		protein coding
chr8:70747205..70747221,-	p2@SLCO5A1	SLCO5A1	ENSG00000137571.10	4.17948	0.383669	0.00386215	UP	ON	protein coding	UP	UP	ON
chr15:55700348..55700388,-	p6@CCPG1	CCPG1	ENSG00000260916.5	4.17904	0.888125	5.01054e-05	UP	ON	protein coding
chr4:166300153..166300168,+	p2@CPE	CPE	ENSG00000109472.13	4.17773	1.74762	0.00124395	UP		protein coding	UP
chr2:47335892..47335907,-	p29@CALM2,p35@CALM3,p51@CALM1	C2orf61	ENSG00000239605.8	4.17697	0.0875609	0.0217249	UP	ON	protein coding
chr11:67855574..67855578,-	p@chr11:67855574..67855578,-	CHKA	NA	4.17556	0.412066	1.04252e-05	UP	ON	protein coding gene body
chr2:237076069..237076110,+	p1@ENST00000415226,p1@ENST00000483218	AC079135.1	ENSG00000233611.3	4.17439	1.55793	1.06193e-06	UP		antisense
chr11:102188241..102188255,+	p2@BIRC3	BIRC3	ENSG00000023445.13	4.17248	1.05774	1.69854e-06	UP	ON	protein coding
chr14:36983118..36983142,-	p3@SFTA3	SFTA3	ENSG00000229415.9	4.1718	1.36527	0.0226804	UP		protein coding		DOWN		OFF
chr11:65222750..65222765,+	p@chr11:65222750..65222765,+	AP000769.1	ENSG00000173727.11	4.17178	3.65805	3.44868e-08	UP		protein coding	NA	NA	NA	NA
chr3:195384929..195384947,+	p1@SDHAP2	LINC00969	ENSG00000242086.8	4.17023	0.0438086	0.0279798	UP	ON	linc	NA	NA	NA	NA
chr10:1779663..1779676,-	p9@ADARB2	ADARB2	ENSG00000185736.15	4.16954	0.0989206	0.0437638	UP		protein coding			OFF	OFF
chr5:89854636..89854651,+	p2@GPR98	GPR98	ENSG00000164199.15	4.16926	-0.0167248	0.0379802	UP	ON	protein coding			ON
chr15:60683342..60683350,-	p7@ANXA2	ANXA2	ENSG00000182718.16	4.16924	0.526658	0.00979054	UP	ON	protein coding
chr7:3740599..3740621,+	p@chr7:3740599..3740621,+	SDK1	NA	4.16772	1.65403	0.000132486	UP		protein coding gene body	UP	UP
chr10:64028400..64028433,-	p1@RTKN2	RTKN2	ENSG00000182010.10	4.16581	1.37	3.48734e-06	UP		protein coding	DOWN	DOWN
chr2:29353367..29353397,+	p12@CLIP4	CLIP4	ENSG00000115295.19	4.16408	0.680468	0.0045838	UP	ON	protein coding
chr1:228871206..228871286,+	p1@RHOU	RHOU	ENSG00000116574.5	4.16388	2.42121	0.0108989	UP		protein coding		DOWN
chr3:145968814..145968846,-	p2@PLSCR4	PLSCR4	ENSG00000114698.14	4.16343	0.339162	0.000828981	UP	ON	protein coding	DOWN	DOWN
chr2:87755107..87755119,+	p4@LINC00152	LINC00152	ENSG00000222041.10	4.16336	0.402322	0.00988776	UP	ON	linc	NA	NA	NA	NA
chr2:154449717..154449762,-	p3@ENST00000424322	AC012501.2	ENSG00000227400.2	4.16323	0.0771692	0.0280785	UP	ON	lncrna		UP	ON	ON
chr6:6007215..6007226,-	p6@NRN1	NRN1	ENSG00000124785.8	4.1631	0.0802009	0.0431327	UP	ON	protein coding	DOWN
chr21:45937474..45937495,+	p2@C21orf90	C21orf90	ENSG00000182912.6	4.16123	0.0724576	0.018151	UP	ON	protein coding		UP	OFF	OFF
chr8:107072679..107072733,-	p1@ENST00000520078,p1@ENST00000520594,p1@ENST00000521622,p1@ENST00000524045	RP11-152P17.2	ENSG00000251003.7	4.15983	4.81178	1.27056e-06	UP		lncrna	NA	NA	NA	NA
chr7:1781892..1781901,-	p2@ENST00000453348	AC074389.9	ENSG00000236081.1	4.15907	0.0800401	0.0357272	UP	ON	linc	UP	UP	ON	ON
chr4:125563283..125563289,-	p@chr4:125563283..125563289,-		NA	4.15849	0.467104	0.0205879	UP	ON	linc	NA	NA	NA	NA
chr2:122660020..122660042,+	p@chr2:122660020..122660042,+		NA	4.15621	0.0913446	0.0256292	UP	ON	linc	NA	NA	NA	NA
chr4:176987131..176987162,+	p2@WDR17	WDR17	ENSG00000150627.15	4.15601	0.0179758	0.0152395	UP	ON	protein coding		DOWN		OFF
chr17:67498411..67498447,+	p2@MAP2K6	MAP2K6	ENSG00000108984.13	4.15599	0.565678	0.0195944	UP		protein coding	UP	UP
chr1:164528687..164528711,+	p6@PBX1	PBX1	ENSG00000185630.18	4.15558	1.28005	0.00161439	UP		protein coding
chr17:13575255..13575271,-	p@chr17:13575255..13575271,-		NA	4.15523	0.07153	0.0422628	UP	ON	linc	NA	NA	NA	NA
chr13:76363027..76363039,+	p22@LMO7	LMO7	ENSG00000136153.19	4.15464	0.0885494	0.0322174	UP	ON	protein coding	DOWN	DOWN
chr2:192711954..192711965,-	p2@SDPR	SDPR	ENSG00000168497.4	4.15405	0.779281	0.00561007	UP		protein coding	DOWN	DOWN
chr2:202118045..202118050,+	p@chr2:202118045..202118050,+	CASP8	NA	4.1525	0.590043	8.34549e-06	UP	ON	protein coding gene body
chr1:181065796..181065797,+	p@chr1:181065796..181065797,+		NA	4.15006	1.28707	2.86672e-05	UP		not annotated	NA	NA	NA	NA
chr4:88898025..88898048,+	p3@SPP1	SPP1	ENSG00000118785.13	4.14787	0.0731748	0.0320823	UP	ON	protein coding	UP	UP
chr12:31548873..31548877,-	p@chr12:31548873..31548877,-	DENND5B	NA	4.14765	0.0850108	0.0223455	UP	ON	protein coding gene body
chr7:134220360..134220368,+	p@chr7:134220360..134220368,+	AKR1B10	NA	4.14761	0.070715	0.0457945	UP		protein coding gene body	UP	UP	ON	ON
chrX:108297452..108297477,+	p@chrX:108297452..108297477,+		NA	4.14715	2.6526	0.00334228	UP		linc	NA	NA	NA	NA
chr8:26371675..26371686,+	p19@DPYSL2	DPYSL2	ENSG00000092964.16	4.14544	0.070664	0.00357936	UP	ON	protein coding	DOWN	DOWN
chrX:102319092..102319107,-	p1@BEX1	BEX1	ENSG00000133169.5	4.145	4.76754	0.0371261	UP		protein coding		UP	OFF	OFF
chr15:33390505..33390525,-	p@chr15:33390505..33390525,-	FMN1	NA	4.14462	0.476398	0.0447894	UP	ON	protein coding gene body		DOWN	ON
chr11:65683428..65683475,+	p@chr11:65683428..65683475,+		NA	4.14437	2.45415	0.000273369	UP		protein coding	NA	NA	NA	NA
chr4:39033232..39033249,-	p@chr4:39033232..39033249,-	TMEM156	NA	4.14326	0.346588	0.00551292	UP	ON	protein coding gene body	UP	UP	ON
chr19:51324293..51324331,-	p@chr19:51324293..51324331,-	KLK1	ENSG00000167748.10	4.14063	1.45451	0.00726775	UP		protein coding		UP	OFF	OFF
chr2:200320768..200320800,-	p4@SATB2	SATB2	ENSG00000119042.16	4.13966	0.0669477	0.00394989	UP	ON	protein coding	UP	UP
chr1:225653027..225653052,-	p1@ENST00000428642	RP11-496N12.6	ENSG00000234476.1	4.13944	0.0532609	0.0341098	UP	ON	other		UP	ON	ON
chr2:176957443..176957457,+	p1@HOXD13	HOXD13	ENSG00000128714.5	4.13726	0.00205148	0.0374382	UP	ON	protein coding	UP	UP	ON	ON
chrX:43887933..43887952,+	p@chrX:43887933..43887952,+		NA	4.13722	0.309107	0.00664426	UP	ON	pseudogene	NA	NA	NA	NA
chr4:166299994..166300007,+	p3@CPE	CPE	ENSG00000109472.13	4.13673	1.3995	0.00113841	UP		protein coding	UP
chr11:28080032..28080036,-	p@chr11:28080032..28080036,-	KIF18A	NA	4.13635	0.36007	8.45045e-05	UP	ON	protein coding gene body	UP	UP
chr3:8811108..8811149,-	p2@OXTR	OXTR	ENSG00000180914.10	4.13611	1.9316	0.0124036	UP		protein coding				ON
chr18:5544022..5544045,-	p4@EPB41L3	EPB41L3	ENSG00000082397.16	4.13486	1.17099	0.00804857	UP		protein coding		DOWN
chr8:79717677..79717705,-	p1@IL7	IL7	ENSG00000104432.12	4.13372	0.562025	0.0048618	UP	ON	protein coding
chr11:92613813..92613863,+	p@chr11:92613813..92613863,+	FAT3		4.13173	0.0219728	0.0453203	UP	ON	protein coding gene body	DOWN	DOWN		OFF
chr12:51984657..51984728,+	p2@SCN8A	SCN8A	ENSG00000196876.9	4.13132	0.733043	5.5621e-05	UP	ON	protein coding	UP	UP
chrX:106449656..106449675,-	p1@NUP62CL	NUP62CL	ENSG00000198088.10	4.13128	2.70183	1.4012e-06	UP		protein coding	UP	UP		ON
chr6:10528731..10528766,+	p1@GCNT2	GCNT2	ENSG00000111846.15	4.1303	2.24639	3.12925e-06	UP		protein coding
chr6:94129263..94129284,-	p1@EPHA7	EPHA7	ENSG00000135333.13	4.12804	0.750273	0.00234017	UP		protein coding	UP	UP	OFF	OFF
chr12:14720405..14720419,+	p1@ENST00000545424	RP11-695J4.2	ENSG00000256751.5	4.12769	0.954412	0.00051112	UP		antisense	NA	NA	NA	NA
chr14:55042757..55042758,+	p@chr14:55042757..55042758,+	SAMD4A	NA	4.12423	1.44887	0.000457226	UP		protein coding gene body		DOWN
chrX:153030941..153030984,+	p2@PLXNB3	PLXNB3	NA	4.1235	0.071038	0.0273036	UP	ON	protein coding	UP	UP		ON
chr19:17516866..17516899,+	p6@FAM125A	CTD-2521M24.9	ENSG00000282851.1	4.12218	0.0820205	0.0443202	UP	ON	linc	NA	NA	NA	NA
chr11:123300967..123300994,+	p1@ENST00000533341,p1@uc001pyu.2	AP000783.1	ENSG00000254667.2	4.12216	1.1548	0.0173971	UP		protein coding			ON
chr12:76459827..76459839,-	p@chr12:76459827..76459839,-	NAP1L1	NA	4.11993	0.627006	5.08339e-06	UP	ON	protein coding gene body
chr11:19799327..19799367,+	p9@NAV2	NAV2	ENSG00000166833.19	4.11968	0.457956	0.0263679	UP	ON	protein coding
[truncated: 15,178 more rows]

## Sheet: S4
Supplementary Table S4: Up-regulated/hypomethylated promoters in NSCLC cell lines.
450K array		CAGE					GSE36216 NSCLC (N = 69) vs. normal (N = 6)				LUAD tumor (N = 431) vs normal (N = 31)				LUSC tumor (N = 359) vs. normal (N = 42)				GSE36216 NSCLC (N = 58)	LUAD (N = 426)	LUSC (N = 359)
Probe ID	distance to TSS	Promoter	DPI	Gene symbol	Annotation	REPEAT	normal β (mean)	tumor β (mean)	n-t	P value	normal β (mean)	tumor β (mean)	n-t	P value	normal β (mean)	tumor β (mean)	n-t	P value	Spearman	Spearman	Spearman
cg11947712	442	p1@HENMT1	chr1:109203685..109203734,-	HENMT1	protein coding		0.869063	0.497742	0.371321	0.00996009	0.864378	0.718646	0.145731	1.1254e-05	0.858348	0.661071	0.197277	9.15438e-12	-0.806146	-0.768825	-0.674573
cg07142325	-726	p1@WARS2	chr1:119683251..119683298,-	WARS2	protein coding		0.86965	0.482981	0.386669	0.0117496	0.907448	0.717996	0.189451	1.86014e-09	0.901293	0.751191	0.150102	6.92063e-09	-0.281491	-0.334394	-0.314623
cg03084710	-1448	p2@ENSA	chr1:150601588..150601631,-	ENSA	protein coding		0.800253	0.452557	0.347697	0.0205803	0.847041	0.55494	0.292101	5.73937e-14	0.815558	0.561745	0.253813	3.68401e-16	-0.076871	-0.432746	-0.257043
cg00504075	-563	p1@GON4L	chr1:155826967..155827018,-	GON4L	protein coding		0.618252	0.368664	0.249588	0.0290616	0.766051	0.445467	0.320584	1.8057e-23	0.725051	0.38861	0.336441	1.21487e-34	-0.0441416	-0.271432	-0.370658
cg17515347	-599	p1@AIM2	chr1:159046532..159046595,-	AIM2	protein coding		0.844478	0.468079	0.3764	0.00466665	0.762584	0.501865	0.260719	4.80492e-13	0.752746	0.472667	0.280079	3.07653e-21	-0.623592	-0.425227	-0.488156
cg17515347	-599	p2@AIM2	chr1:159046617..159046630,-	AIM2	protein coding		0.844478	0.468079	0.3764	0.00466665	0.762584	0.501865	0.260719	4.80492e-13	0.752746	0.472667	0.280079	3.07653e-21	-0.623592	-0.425227	-0.488156
cg01380361	-1309	p1@YOD1	chr1:207224307..207224368,-	YOD1	protein coding		0.775137	0.47128	0.303857	0.00642593	0.846443	0.562328	0.284114	4.54536e-19	0.849956	0.531315	0.318641	2.85859e-30	-0.236212	-0.207422	-0.202935
cg05968010	-477	p1@DIEXF	chr1:210001309..210001411,+	DIEXF	protein coding		0.808253	0.451238	0.357015	0.0356416	0.557429	0.363582	0.193847	1.43189e-05	0.505443	0.281916	0.223527	2.24621e-11	-0.275831	-0.0921536	-0.252981
cg10968055	-911	p1@KCNH1	chr1:211307404..211307472,-	KCNH1	protein coding		0.811327	0.486902	0.324424	0.0200344	0.849678	0.719265	0.130413	7.5887e-07	0.816542	0.597286	0.219257	5.31529e-20	0.270286	-0.0392561	-0.072612
cg16662846	452	p1@LOC339535	chr1:238649277..238649316,-	RP11-371I1.2	linc	LTR/ERV1	0.742865	0.363427	0.379438	0.00651046	0.7646	0.561894	0.202706	5.12149e-09	0.73771	0.589721	0.147989	1.18499e-05	-0.570595	-0.382232	-0.802754
cg16662846	452	p1@ENST00000400946	chr1:238649319..238649345,-	RP11-371I1.2	linc	LTR/ERV1	0.742865	0.363427	0.379438	0.00651046	0.7646	0.561894	0.202706	5.12149e-09	0.73771	0.589721	0.147989	1.18499e-05	-0.570595	-0.382232	-0.802754
cg11314684	270	p3@AKT3	chr1:244006528..244006588,-	AKT3	protein coding		0.44659	0.240241	0.206349	0.0326048	0.513919	0.33685	0.177069	3.34442e-11	0.463154	0.275511	0.187643	5.36101e-22	0.504199	0.360619	0.394135
cg12910806	-967	p3@CNST	chr1:246729601..246729687,+	CNST	protein coding		0.833557	0.401319	0.432238	0.00101394	0.750074	0.524179	0.225895	4.50273e-11	0.760861	0.474087	0.286774	1.52239e-23	-0.245563	-0.295013	-0.21641
cg14460735	-917	p3@CNST	chr1:246729601..246729687,+	CNST	protein coding		0.676883	0.370549	0.306335	0.00093316	0.520654	0.409372	0.111282	1.1515e-07	0.525227	0.40212	0.123107	1.68243e-14	-0.348304	-0.354716	-0.253192
cg17815049	-981	p3@CNST	chr1:246729601..246729687,+	CNST	protein coding		0.657555	0.281822	0.375733	0.00736148	0.529964	0.370755	0.159208	1.03066e-09	0.531513	0.329564	0.201949	2.01655e-24	-0.306469	-0.32403	-0.273095
cg12910806	-967	p1@CNST	chr1:246729724..246729794,+	CNST	protein coding	Simple repeat	0.833557	0.401319	0.432238	0.00101394	0.750074	0.524179	0.225895	4.50273e-11	0.760861	0.474087	0.286774	1.52239e-23	-0.245563	-0.295013	-0.21641
cg14460735	-917	p1@CNST	chr1:246729724..246729794,+	CNST	protein coding	Simple repeat	0.676883	0.370549	0.306335	0.00093316	0.520654	0.409372	0.111282	1.1515e-07	0.525227	0.40212	0.123107	1.68243e-14	-0.348304	-0.354716	-0.253192
cg17815049	-981	p1@CNST	chr1:246729724..246729794,+	CNST	protein coding	Simple repeat	0.657555	0.281822	0.375733	0.00736148	0.529964	0.370755	0.159208	1.03066e-09	0.531513	0.329564	0.201949	2.01655e-24	-0.306469	-0.32403	-0.273095
cg12910806	-967	p4@CNST	chr1:246729815..246729841,+	CNST	protein coding		0.833557	0.401319	0.432238	0.00101394	0.750074	0.524179	0.225895	4.50273e-11	0.760861	0.474087	0.286774	1.52239e-23	-0.245563	-0.295013	-0.21641
cg14460735	-917	p4@CNST	chr1:246729815..246729841,+	CNST	protein coding		0.676883	0.370549	0.306335	0.00093316	0.520654	0.409372	0.111282	1.1515e-07	0.525227	0.40212	0.123107	1.68243e-14	-0.348304	-0.354716	-0.253192
cg17815049	-981	p4@CNST	chr1:246729815..246729841,+	CNST	protein coding		0.657555	0.281822	0.375733	0.00736148	0.529964	0.370755	0.159208	1.03066e-09	0.531513	0.329564	0.201949	2.01655e-24	-0.306469	-0.32403	-0.273095
cg12910806	-967	p2@CNST	chr1:246729845..246729891,+	CNST	protein coding		0.833557	0.401319	0.432238	0.00101394	0.750074	0.524179	0.225895	4.50273e-11	0.760861	0.474087	0.286774	1.52239e-23	-0.245563	-0.295013	-0.21641
cg14460735	-917	p2@CNST	chr1:246729845..246729891,+	CNST	protein coding		0.676883	0.370549	0.306335	0.00093316	0.520654	0.409372	0.111282	1.1515e-07	0.525227	0.40212	0.123107	1.68243e-14	-0.348304	-0.354716	-0.253192
cg17815049	-981	p2@CNST	chr1:246729845..246729891,+	CNST	protein coding		0.657555	0.281822	0.375733	0.00736148	0.529964	0.370755	0.159208	1.03066e-09	0.531513	0.329564	0.201949	2.01655e-24	-0.306469	-0.32403	-0.273095
cg09373727	-1419	p1@PTP4A2	chr1:32403903..32403978,-	PTP4A2	protein coding	Simple repeat	0.872885	0.450303	0.422582	0.00336174	0.861272	0.573272	0.288001	3.31951e-19	0.844061	0.659163	0.184898	7.00262e-11	-0.466732	-0.236801	-0.446129
cg14838566	-712	p@chr1:37791753..37791757,+	chr1:37791753..37791757,+		not annotated		0.509265	0.284176	0.225089	0.0276439	0.843511	0.624357	0.219153	1.22615e-13	0.825773	0.531781	0.293992	1.01553e-32	NA	NA	NA
cg09216236	-495	p1@DNAJC6	chr1:65720089..65720155,+	DNAJC6	protein coding	Simple repeat	0.486282	0.271745	0.214537	0.0252932	0.384306	0.151516	0.232791	1.28558e-42	0.307005	0.12578	0.181226	7.87424e-52	0.271402	-0.0355012	0.100196
cg08128007	-759	p@chr1:840185..840202,+	chr1:840185..840202,+	RP11-54O7.16	linc		0.785492	0.543335	0.242157	0.0430631	0.791062	0.618205	0.172857	3.18443e-12	0.788211	0.584137	0.204074	1.18169e-21	NA	-0.0169652	-0.21461
cg23216685	-556	p4@ZNHIT6	chr1:86174045..86174056,-	ZNHIT6	protein coding		0.836793	0.495101	0.341692	0.0369028	0.94486	0.763303	0.181557	1.59543e-08	0.93336	0.638747	0.294613	6.69398e-25	0.0711495	-0.177229	-0.238817
cg27462398	-591	p4@ZNHIT6	chr1:86174045..86174056,-	ZNHIT6	protein coding		0.808482	0.418902	0.389579	0.00373468	0.769583	0.683161	0.0864219	0.0014176	0.797214	0.591485	0.20573	5.62853e-19	-0.0421114	-0.145555	-0.242577
cg23216685	-556	p1@ZNHIT6	chr1:86174065..86174134,-	ZNHIT6	protein coding		0.836793	0.495101	0.341692	0.0369028	0.94486	0.763303	0.181557	1.59543e-08	0.93336	0.638747	0.294613	6.69398e-25	0.0711495	-0.177229	-0.238817
cg27462398	-591	p1@ZNHIT6	chr1:86174065..86174134,-	ZNHIT6	protein coding		0.808482	0.418902	0.389579	0.00373468	0.769583	0.683161	0.0864219	0.0014176	0.797214	0.591485	0.20573	5.62853e-19	-0.0421114	-0.145555	-0.242577
cg10430205	227	p1@GTF2B	chr1:89357240..89357257,-	GTF2B	protein coding		0.72865	0.285802	0.442848	0.00479738	0.771713	0.62683	0.144883	3.64747e-06	0.785695	0.54537	0.240325	2.62201e-19	-0.105294	-0.140411	-0.0479495
cg17811845	172	p1@GTF2B	chr1:89357240..89357257,-	GTF2B	protein coding		0.58805	0.244664	0.343386	0.00467802	0.546355	0.426266	0.12009	3.11816e-05	0.556058	0.359417	0.19664	1.0736e-18	-0.222308	-0.0928896	-0.0555594
cg10430205	227	p@chr1:89358212..89358217,-	chr1:89358212..89358217,-		protein coding	LTR/ERV1	0.72865	0.285802	0.442848	0.00479738	0.771713	0.62683	0.144883	3.64747e-06	0.785695	0.54537	0.240325	2.62201e-19	NA	NA	NA
cg17811845	172	p@chr1:89358212..89358217,-	chr1:89358212..89358217,-		protein coding	LTR/ERV1	0.58805	0.244664	0.343386	0.00467802	0.546355	0.426266	0.12009	3.11816e-05	0.556058	0.359417	0.19664	1.0736e-18	NA	NA	NA
cg13269555	432	p4@KAZALD1	chr10:102821551..102821589,+	KAZALD1	protein coding		0.802688	0.358346	0.444342	0.00468873	0.598782	0.429695	0.169087	3.48168e-10	0.58511	0.516374	0.0687359	0.00859988	-0.75699	-0.591415	-0.483364
cg15302379	278	p4@KAZALD1	chr10:102821551..102821589,+	KAZALD1	protein coding		0.832538	0.431525	0.401014	0.0146519	0.665959	0.532275	0.133684	2.6464e-09	0.65707	0.601704	0.0553664	0.0107459	-0.736996	-0.585668	-0.528919
cg26605164	-5	p4@KAZALD1	chr10:102821551..102821589,+	KAZALD1	protein coding		0.646703	0.318432	0.328272	0.0127679	0.450965	0.426846	0.0241191	0.288326	0.452279	0.442252	0.0100276	0.657203	-0.690055	-0.430882	-0.433612
cg13269555	432	p1@KAZALD1	chr10:102821731..102821752,+	KAZALD1	protein coding		0.802688	0.358346	0.444342	0.00468873	0.598782	0.429695	0.169087	3.48168e-10	0.58511	0.516374	0.0687359	0.00859988	-0.75699	-0.591415	-0.483364
cg15302379	278	p1@KAZALD1	chr10:102821731..102821752,+	KAZALD1	protein coding		0.832538	0.431525	0.401014	0.0146519	0.665959	0.532275	0.133684	2.6464e-09	0.65707	0.601704	0.0553664	0.0107459	-0.736996	-0.585668	-0.528919
cg26605164	-5	p1@KAZALD1	chr10:102821731..102821752,+	KAZALD1	protein coding		0.646703	0.318432	0.328272	0.0127679	0.450965	0.426846	0.0241191	0.288326	0.452279	0.442252	0.0100276	0.657203	-0.690055	-0.430882	-0.433612
cg03804621	-494	p1@ENST00000416234	chr10:124639222..124639278,+	RP11-564D11.3	pseudogene		0.518847	0.166655	0.352192	9.67421e-05	0.539477	0.435079	0.104398	1.88638e-07	0.497115	0.444597	0.052518	0.0106272	-0.296626	-0.290676	-0.448477
cg16299003	-446	p1@ENST00000416234	chr10:124639222..124639278,+	RP11-564D11.3	pseudogene		0.443222	0.110435	0.332787	1.35914e-05	0.453219	0.410884	0.0423344	0.0033196	0.420433	0.419001	0.00143159	0.926899	-0.216217	-0.232138	-0.423398
cg17837712	-1050	p1@ENST00000416234	chr10:124639222..124639278,+	RP11-564D11.3	pseudogene		0.866198	0.61074	0.255458	0.0282972	0.94809	0.815461	0.132629	1.21806e-06	0.9324	0.73296	0.199441	2.17414e-14	-0.32105	-0.433915	-0.338706
cg00042156	-140	p1@CCNYL2	chr10:42970747..42970790,-		pseudogene		0.5652	0.310344	0.254856	0.0352511	0.671189	0.545051	0.126138	1.44697e-06	0.657533	0.490486	0.167048	4.53055e-15	NA	NA	NA
cg00042156	-140	p1@ENST00000332123,p1@ENST00000429940	chr10:42970962..42971001,+	LINC00839	linc		0.5652	0.310344	0.254856	0.0352511	0.671189	0.545051	0.126138	1.44697e-06	0.657533	0.490486	0.167048	4.53055e-15	0.168513	0.203006	-0.244727
cg00042156	-140	p1@LOC84856	chr10:42971050..42971098,+	LINC00839	linc		0.5652	0.310344	0.254856	0.0352511	0.671189	0.545051	0.126138	1.44697e-06	0.657533	0.490486	0.167048	4.53055e-15	0.168513	0.203006	-0.244727
cg02780400	-296	p1@ENST00000411439	chr10:43187153..43187192,-	AL022344.4	linc	REP522	0.752383	0.472844	0.279539	0.00381736	0.953442	0.777643	0.175799	9.82338e-06	0.960645	0.522926	0.437719	8.9042e-36	-0.438487	-0.450088	-0.12079
cg11519260	363	p1@ENST00000411439	chr10:43187153..43187192,-	AL022344.4	linc	REP522	0.724555	0.422522	0.302033	0.0202805	0.914716	0.783763	0.130953	1.27664e-05	0.890068	0.798595	0.0914727	0.00019905	-0.333041	-0.238064	-0.344444
cg22601415	-510	p13@ANK3	chr10:61900409..61900450,-	ANK3	protein coding		0.88475	0.513992	0.370758	0.0119772	0.726271	0.566027	0.160245	2.19232e-08	0.738227	0.581497	0.15673	9.67353e-10	-0.350334	-0.0558664	-0.328816
cg22601415	-510	p12@ANK3	chr10:61900474..61900503,-	ANK3	protein coding		0.88475	0.513992	0.370758	0.0119772	0.726271	0.566027	0.160245	2.19232e-08	0.738227	0.581497	0.15673	9.67353e-10	-0.350334	-0.0558664	-0.328816
cg11647108	353	p2@LOC439990	chr10:81967152..81967173,+	LINC00857	linc		0.348897	0.13022	0.218677	0.00707633	0.576212	0.445167	0.131045	1.90908e-07	0.556696	0.603734	-0.0470387	0.126385	-0.322157	-0.337524	-0.779818
cg11647108	353	p1@LOC439990	chr10:81967174..81967212,+	LINC00857	linc		0.348897	0.13022	0.218677	0.00707633	0.576212	0.445167	0.131045	1.90908e-07	0.556696	0.603734	-0.0470387	0.126385	-0.322157	-0.337524	-0.779818
cg11647108	353	p3@LOC439990	chr10:81967456..81967471,+	LINC00857	linc		0.348897	0.13022	0.218677	0.00707633	0.576212	0.445167	0.131045	1.90908e-07	0.556696	0.603734	-0.0470387	0.126385	-0.322157	-0.337524	-0.779818
cg22508615	285	p3@KIF11	chr10:94352819..94352838,+	KIF11	protein coding		0.365568	0.144803	0.220765	0.00210238	0.156742	0.114082	0.0426593	3.73394e-05	0.149576	0.0992841	0.050292	4.05681e-12	0.0362054	-0.216514	-0.30832
cg22508615	285	p2@KIF11	chr10:94352840..94352868,+	KIF11	protein coding		0.365568	0.144803	0.220765	0.00210238	0.156742	0.114082	0.0426593	3.73394e-05	0.149576	0.0992841	0.050292	4.05681e-12	0.0362054	-0.216514	-0.30832
cg22508615	285	p1@KIF11	chr10:94352870..94352930,+	KIF11	protein coding		0.365568	0.144803	0.220765	0.00210238	0.156742	0.114082	0.0426593	3.73394e-05	0.149576	0.0992841	0.050292	4.05681e-12	0.0362054	-0.216514	-0.30832
cg22508615	285	p4@KIF11	chr10:94352941..94352954,+	KIF11	protein coding		0.365568	0.144803	0.220765	0.00210238	0.156742	0.114082	0.0426593	3.73394e-05	0.149576	0.0992841	0.050292	4.05681e-12	0.0362054	-0.216514	-0.30832
cg25314624	488	p2@CEP55	chr10:95256421..95256437,+	CEP55	protein coding		0.790737	0.350563	0.440174	0.00043825	0.835523	0.58052	0.255003	3.04346e-18	0.831973	0.531784	0.300188	6.33946e-35	-0.338645	-0.529349	-0.490548
cg21727486	-606	p3@NCAM1	chr11:112832101..112832112,+	NCAM1	protein coding		0.854252	0.397895	0.456356	0.000648732	0.407191	0.429425	-0.0222346	0.450357	0.413513	0.436057	-0.0225444	0.396355	0.238755	0.301	0.263188
cg21727486	-606	p1@NCAM1	chr11:112832133..112832151,+	NCAM1	protein coding		0.854252	0.397895	0.456356	0.000648732	0.407191	0.429425	-0.0222346	0.450357	0.413513	0.436057	-0.0225444	0.396355	0.238755	0.301	0.263188
cg09632136	-1399	p5@NNMT	chr11:114167053..114167067,+	NNMT	protein coding		0.63715	0.338151	0.298999	0.0348063	0.455606	0.493218	-0.0376123	0.221935	0.428343	0.533729	-0.105386	4.14868e-05	-0.623796	-0.438931	-0.111833
cg14520913	-620	p5@NNMT	chr11:114167053..114167067,+	NNMT	protein coding		0.809423	0.513296	0.296127	0.0391329	0.856691	0.700924	0.155767	1.31226e-08	0.840586	0.694545	0.14604	1.70161e-11	-0.265373	-0.490484	-0.0974098
cg17004104	-1330	p5@NNMT	chr11:114167053..114167067,+	NNMT	protein coding		0.40457	0.181063	0.223507	0.00198349	0.243894	0.2272	0.0166938	0.404945	0.205998	0.214747	-0.00874881	0.587821	-0.538958	-0.382648	-0.00046944
cg01129262	-1226	p1@NTM	chr11:131240498..131240532,+	NTM	protein coding		0.728403	0.41439	0.314013	0.0017269	0.877996	0.670606	0.20739	3.98576e-13	0.873746	0.69152	0.182226	1.47525e-13	0.435768	0.214354	0.280254
cg01718479	145	p1@NTM	chr11:131240498..131240532,+	NTM	protein coding		0.326633	0.109906	0.216726	9.62469e-06	0.538382	0.363279	0.175103	2.36831e-14	0.501677	0.347357	0.15432	2.13686e-13	0.130857	0.110799	0.125419
cg01964039	-812	p1@NTM	chr11:131240498..131240532,+	NTM	protein coding		0.579805	0.297095	0.28271	0.00373474	0.879769	0.618176	0.261594	6.21334e-16	0.850688	0.662692	0.187996	1.50078e-11	0.320285	0.231367	0.288644
cg04414912	-1485	p1@NTM	chr11:131240498..131240532,+	NTM	protein coding		0.788597	0.368016	0.420581	0.000450292	0.918198	0.707332	0.210866	3.65682e-11	0.906569	0.697677	0.208893	2.12487e-13	0.373354	0.165512	0.246997
cg01397325	369	p4@HTATIP2	chr11:20385642..20385663,+	HTATIP2	protein coding		0.520168	0.253852	0.266316	0.00691959	0.497621	0.357679	0.139942	2.47629e-21	0.478261	0.340801	0.13746	2.16858e-21	-0.552924	-0.229219	-0.430149
cg01397325	369	p2@HTATIP2	chr11:20385666..20385757,+	HTATIP2	protein coding		0.520168	0.253852	0.266316	0.00691959	0.497621	0.357679	0.139942	2.47629e-21	0.478261	0.340801	0.13746	2.16858e-21	-0.552924	-0.229219	-0.430149
cg02130133	-803	p1@ANO5	chr11:22214569..22214642,+	ANO5	protein coding		0.617677	0.352439	0.265237	0.0280026	0.669172	0.529737	0.139435	4.47339e-08	0.642054	0.508153	0.133901	1.04113e-08	0.280627	0.0943374	0.0987513
cg08497367	-1037	p1@C11orf74	chr11:36616044..36616095,+	C11orf74	protein coding		0.873885	0.57406	0.299825	0.0190369	0.927963	0.78377	0.144193	1.97724e-07	0.920891	0.77025	0.150641	2.57682e-11	0.333169	0.206524	0.00941914
cg16604126	-987	p1@OR51E1	chr11:4665195..4665219,+	OR51E1	protein coding		0.665773	0.372882	0.292892	0.0345432	0.904048	0.689722	0.214326	1.88718e-11	0.869408	0.679587	0.189822	6.33814e-12	0.249225	-0.0992199	0.0811035
cg27183113	-205	p1@OR51E1	chr11:4665195..4665219,+	OR51E1	protein coding		0.714598	0.453247	0.261351	0.0483005	0.785587	0.654103	0.131483	1.57827e-07	0.783732	0.609181	0.174551	3.10873e-15	0.149311	-0.087576	0.211797
cg23644457	-154	p1@ENST00000530434	chr11:56457700..56457749,+	RP11-59K5.1	pseudogene		0.601607	0.341338	0.260269	0.00568762	0.847444	0.632748	0.214696	5.08569e-12	0.826207	0.617327	0.20888	1.53431e-14	NA	-0.0601834	0.0204322
cg15723195	-453	p1@FAM111A	chr11:58912240..58912355,+	FAM111A	protein coding		0.813853	0.428267	0.385586	0.00435889	0.774428	0.560534	0.213894	1.41417e-15	0.78287	0.654845	0.128025	1.10347e-06	-0.316005	-0.12914	-0.435709
cg04986336	-229	p1@ACY3	chr11:67418152..67418213,-	ACY3	protein coding		0.528157	0.29123	0.236927	0.0347916	0.34103	0.263657	0.0773724	8.92767e-08	0.307593	0.277685	0.0299082	0.0962635	-0.449214	-0.124747	-0.120793
cg01638792	-239	p5@MYEOV	chr11:69061580..69061585,+	MYEOV	protein coding		0.795403	0.415751	0.379652	0.0251685	0.902868	0.689949	0.21292	9.64764e-11	0.886588	0.639126	0.247462	1.66877e-17	-0.781291	-0.668135	-0.330665
cg01638792	-239	p1@MYEOV	chr11:69061594..69061635,+	MYEOV	protein coding		0.795403	0.415751	0.379652	0.0251685	0.902868	0.689949	0.21292	9.64764e-11	0.886588	0.639126	0.247462	1.66877e-17	-0.781291	-0.668135	-0.330665
cg01638792	-239	p3@MYEOV	chr11:69061636..69061648,+	MYEOV	protein coding		0.795403	0.415751	0.379652	0.0251685	0.902868	0.689949	0.21292	9.64764e-11	0.886588	0.639126	0.247462	1.66877e-17	-0.781291	-0.668135	-0.330665
cg05513274	-1303	p1@ENST00000510694,p1@ENST00000550223	chr12:114211448..114211463,-	RP11-438N16.1	linc	LTR/ERVL-MaLR	0.565827	0.198622	0.367205	0.000122992	0.801499	0.53871	0.262789	2.61454e-17	0.781192	0.505958	0.275234	2.02547e-26	0.0694884	NA	NA
cg05513274	-1303	p1@ENST00000547963,p1@ENST00000550905,p1@uc001tvk.1,p1@uc001tvl.3	chr12:114211474..114211499,-	RP11-438N16.1	linc	LTR/ERVL-MaLR	0.565827	0.198622	0.367205	0.000122992	0.801499	0.53871	0.262789	2.61454e-17	0.781192	0.505958	0.275234	2.02547e-26	0.0694884	NA	NA
cg23087707	-846	p2@GALNT9	chr12:132863007..132863039,-	GALNT9	protein coding		0.735647	0.432239	0.303408	0.0298653	0.932905	0.634465	0.29844	3.49496e-16	0.90995	0.548083	0.361867	1.19407e-32	0.0860875	0.0366088	0.165534
cg23087707	-846	p4@GALNT9	chr12:132863063..132863075,-	GALNT9	protein coding		0.735647	0.432239	0.303408	0.0298653	0.932905	0.634465	0.29844	3.49496e-16	0.90995	0.548083	0.361867	1.19407e-32	0.0860875	0.0366088	0.165534
cg08198187	384	p1@AMN1	chr12:31881948..31881965,-	AMN1	protein coding		0.77286	0.329341	0.443519	0.000115467	0.669025	0.404606	0.264419	3.04669e-35	0.654654	0.460626	0.194028	2.95793e-17	-0.10394	-0.149188	-0.269801
cg08198187	384	p2@AMN1	chr12:31881976..31882021,-	AMN1	protein coding		0.77286	0.329341	0.443519	0.000115467	0.669025	0.404606	0.264419	3.04669e-35	0.654654	0.460626	0.194028	2.95793e-17	-0.10394	-0.149188	-0.269801
cg08198187	384	p3@AMN1	chr12:31882027..31882048,-	AMN1	protein coding		0.77286	0.329341	0.443519	0.000115467	0.669025	0.404606	0.264419	3.04669e-35	0.654654	0.460626	0.194028	2.95793e-17	-0.10394	-0.149188	-0.269801
cg08198187	384	p@chr12:31882192..31882231,+	chr12:31882192..31882231,+		not annotated		0.77286	0.329341	0.443519	0.000115467	0.669025	0.404606	0.264419	3.04669e-35	0.654654	0.460626	0.194028	2.95793e-17	NA	-0.246419	-0.380563
cg01928411	-693	p1@LARP4	chr12:50794618..50794729,+	LARP4	protein coding		0.701915	0.463901	0.238014	0.0271492	0.935124	0.724819	0.210305	5.04016e-11	0.915167	0.579758	0.335409	7.77431e-31	0.0260543	-0.215422	-0.248715
cg01928411	-693	p2@LARP4	chr12:50794730..50794756,+	LARP4	protein coding		0.701915	0.463901	0.238014	0.0271492	0.935124	0.724819	0.210305	5.04016e-11	0.915167	0.579758	0.335409	7.77431e-31	0.0260543	-0.215422	-0.248715
cg07684775	300	p3@ZNF385A	chr12:54772960..54773015,-	ZNF385A	protein coding	Simple repeat	0.565768	0.138012	0.427756	1.4611e-11	0.429847	0.412996	0.0168511	0.516782	0.403873	0.505992	-0.102119	0.000497333	0.0841921	0.27305	0.040452
cg03758367	-170	p1@GTSF1	chr12:54867352..54867392,-	GTSF1	protein coding		0.709457	0.454487	0.25497	0.0141406	0.821875	0.624465	0.197411	3.01294e-14	0.817391	0.602812	0.214578	6.86779e-19	-0.27487	-0.119626	-0.352756
cg01027209	472	p2@LINC00460	chr13:107028964..107028978,+	LINC00460	linc		0.906982	0.611791	0.29519	0.0356851	0.932217	0.808128	0.124088	8.24484e-08	0.933611	0.779924	0.153688	3.9841e-15	-0.229273	NA	NA
cg01027209	472	p4@LINC00460	chr13:107029084..107029103,+	LINC00460	linc		0.906982	0.611791	0.29519	0.0356851	0.932217	0.808128	0.124088	8.24484e-08	0.933611	0.779924	0.153688	3.9841e-15	-0.229273	NA	NA
cg01027209	472	p3@LINC00460	chr13:107029290..107029313,+	LINC00460	linc		0.906982	0.611791	0.29519	0.0356851	0.932217	0.808128	0.124088	8.24484e-08	0.933611	0.779924	0.153688	3.9841e-15	NA	NA	NA
cg16325826	-38	p@chr13:113719164..113719184,+	chr13:113719164..113719184,+	MCF2L	protein coding		0.909498	0.346636	0.562863	0.022361	0.925834	0.645977	0.279857	1.18358e-13	0.915418	0.716358	0.19906	1.55917e-08	-0.260882	-0.132493	0.180658
cg25307724	-2	p@chr13:113719164..113719184,+	chr13:113719164..113719184,+	MCF2L	protein coding		0.873645	0.422675	0.45097	0.0155134	0.876362	0.63572	0.240642	5.28739e-13	0.889645	0.718908	0.170737	2.84873e-09	-0.311268	-0.178938	0.181528
cg04398180	9	p2@ADPRHL1	chr13:114103443..114103479,-	ADPRHL1	protein coding		0.603333	0.209281	0.394052	0.000395562	0.512551	0.465396	0.0471553	0.0167497	0.487857	0.490013	-0.00215672	0.915575	-0.438432	-0.444724	-0.48725
cg05163330	-596	p2@ADPRHL1	chr13:114103443..114103479,-	ADPRHL1	protein coding		0.388966	0.183347	0.205619	0.0421981	0.521372	0.388043	0.133329	7.12928e-09	0.513664	0.380251	0.133413	3.90775e-09	-0.553601	-0.404157	-0.481563
cg10624914	-16	p2@ADPRHL1	chr13:114103443..114103479,-	ADPRHL1	protein coding		0.484715	0.164855	0.31986	4.73472e-05	0.497514	0.42405	0.0734642	0.000100953	0.482105	0.438295	0.0438102	0.0174679	-0.371866	-0.424916	-0.478044
cg22478679	-185	p2@ADPRHL1	chr13:114103443..114103479,-	ADPRHL1	protein coding		0.337445	0.130288	0.207157	0.00330947	0.503831	0.470408	0.0334229	0.095758	0.515211	0.466579	0.0486321	0.0148187	-0.32025	-0.401883	-0.406686
cg12206359	-387	p4@DCLK1	chr13:36429731..36429762,-	DCLK1	protein coding		0.64406	0.392603	0.251457	0.049146	0.696777	0.576895	0.119882	6.54761e-05	0.686224	0.49518	0.191043	6.24578e-15	-0.0716417	0.05171	0.370517
cg12206359	-387	p1@DCLK1	chr13:36429787..36429812,-	DCLK1	protein coding		0.64406	0.392603	0.251457	0.049146	0.696777	0.576895	0.119882	6.54761e-05	0.686224	0.49518	0.191043	6.24578e-15	-0.0716417	0.05171	0.370517
cg12206359	-387	p12@DCLK1	chr13:36429819..36429826,-	DCLK1	protein coding		0.64406	0.392603	0.251457	0.049146	0.696777	0.576895	0.119882	6.54761e-05	0.686224	0.49518	0.191043	6.24578e-15	-0.0716417	0.05171	0.370517
cg12206359	-387	p10@DCLK1	chr13:36429829..36429838,-	DCLK1	protein coding		0.64406	0.392603	0.251457	0.049146	0.696777	0.576895	0.119882	6.54761e-05	0.686224	0.49518	0.191043	6.24578e-15	-0.0716417	0.05171	0.370517
cg12206359	-387	p13@DCLK1	chr13:36429874..36429881,-	DCLK1	protein coding		0.64406	0.392603	0.251457	0.049146	0.696777	0.576895	0.119882	6.54761e-05	0.686224	0.49518	0.191043	6.24578e-15	-0.0716417	0.05171	0.370517
cg12987911	-927	p1@SERTM1	chr13:37248149..37248196,+	SERTM1	protein coding		0.851718	0.532263	0.319455	0.030341	0.810454	0.739385	0.0710685	0.00584202	0.834545	0.700217	0.134328	9.30145e-08	0.450766	0.331487	0.455777
cg20900869	-644	p2@LINC00221	chr14:106938501..106938524,+	LINC00221	linc		0.836745	0.582389	0.254356	0.0231121	0.969629	0.872062	0.0975671	0.000113842	0.965308	0.807312	0.157996	3.32116e-09	NA	NA	NA
cg20900869	-644	p1@LINC00221	chr14:106938552..106938596,+	LINC00221	linc		0.836745	0.582389	0.254356	0.0231121	0.969629	0.872062	0.0975671	0.000113842	0.965308	0.807312	0.157996	3.32116e-09	NA	NA	NA
cg15301694	-1412	p2@STRN3	chr14:31495421..31495463,-	STRN3	protein coding		0.834852	0.474301	0.360551	0.00336009	0.812102	0.669753	0.142348	5.32174e-07	0.800462	0.721645	0.0788164	0.00178048	0.0360823	-0.258684	-0.161903
cg13131167	-702	p1@NUBPL	chr14:32030582..32030661,+	NUBPL	protein coding		0.87376	0.580009	0.293751	0.0371904	0.864763	0.726783	0.137979	3.2523e-06	0.883601	0.59217	0.291431	7.24587e-25	-0.143806	-0.11942	-0.115666
cg18174881	-1055	p2@MIS18BP1	chr14:45722287..45722308,-	MIS18BP1	protein coding		0.627588	0.276793	0.350795	0.00641296	0.578708	0.503943	0.0747648	0.011592	0.579091	0.570616	0.00847411	0.774196	-0.0309145	-0.116484	-0.170732
cg18174881	-1055	p3@MIS18BP1	chr14:45722335..45722348,-	MIS18BP1	protein coding		0.627588	0.276793	0.350795	0.00641296	0.578708	0.503943	0.0747648	0.011592	0.579091	0.570616	0.00847411	0.774196	-0.0309145	-0.116484	-0.170732
cg18174881	-1055	p1@MIS18BP1	chr14:45722360..45722415,-	MIS18BP1	protein coding		0.627588	0.276793	0.350795	0.00641296	0.578708	0.503943	0.0747648	0.011592	0.579091	0.570616	0.00847411	0.774196	-0.0309145	-0.116484	-0.170732
cg01498900	-246	p1@ACOT2	chr14:74035970..74036005,+	ACOT2	protein coding		0.375037	0.163805	0.211232	0.000120235	0.0955889	0.119675	-0.0240864	0.000317941	0.0828947	0.179968	-0.0970738	2.43699e-08	-0.389892	-0.190278	-0.479669
cg20067142	-590	p1@ACOT2	chr14:74035970..74036005,+	ACOT2	protein coding		0.794193	0.544712	0.249482	0.00674778	0.82067	0.666662	0.154008	2.78358e-09	0.804999	0.772814	0.0321848	0.167896	-0.364668	-0.342828	-0.362052
cg19681842	-772	p1@UBR7	chr14:93673574..93673634,+	UBR7	protein coding		0.419158	0.190497	0.228662	0.0035246	0.475614	0.258387	0.217227	4.64437e-22	0.443222	0.207357	0.235865	3.32369e-55	-0.0861608	-0.155278	-0.323532
cg14597067	-338	p@chr15:21905826..21905834,-	chr15:21905826..21905834,-		pseudogene	REP522	0.767898	0.539878	0.228021	0.0343059	0.796295	0.72358	0.0727152	0.00187514	0.79322	0.698545	0.0946752	2.88164e-05	NA	NA	NA
cg20769842	-582	p1@MKRN3	chr15:23810812..23810828,+	MKRN3	protein coding		0.548815	0.279207	0.269608	0.0126574	0.773212	0.622851	0.150361	2.37813e-07	0.72478	0.48087	0.24391	6.95232e-20	-0.476214	-0.297398	-0.422185
cg27158462	419	p2@GABRB3	chr15:26874230..26874243,-	GABRB3	protein coding		0.578798	0.2573	0.321498	0.00601266	0.802703	0.575884	0.226819	1.1253e-17	0.803037	0.529353	0.273685	1.57488e-27	0.0151732	-0.0652434	-0.0459568
cg04336814	-797	p1@GABRB3	chr15:27018175..27018241,-	GABRB3	protein coding	Low complexity	0.543132	0.314629	0.228503	0.0405558	0.860618	0.614898	0.245719	1.35512e-13	0.815875	0.476258	0.339617	2.14172e-32	0.318391	0.155847	-0.0328785
cg04336814	-797	p3@GABRB3	chr15:27018884..27018916,-	GABRB3	protein coding		0.543132	0.314629	0.228503	0.0405558	0.860618	0.614898	0.245719	1.35512e-13	0.815875	0.476258	0.339617	2.14172e-32	0.318391	0.155847	-0.0328785
cg24222194	-496	p2@HERC2P9	chr15:28834584..28834602,+	HERC2P9	pseudogene		0.507332	0.297462	0.20987	0.0138147	0.559094	0.465141	0.0939532	7.82582e-07	0.567883	0.420411	0.147471	1.10978e-17	0.0860377	NA	NA
cg24222194	-496	p1@HERC2P9	chr15:28834609..28834646,+	HERC2P9	pseudogene		0.507332	0.297462	0.20987	0.0138147	0.559094	0.465141	0.0939532	7.82582e-07	0.567883	0.420411	0.147471	1.10978e-17	0.0860377	NA	NA
cg00083193	-304	p1@OSTBETA	chr15:65337716..65337742,+	SLC51B	protein coding		0.540612	0.330641	0.209971	0.0482983	0.482299	0.389537	0.0927626	2.08172e-07	0.473477	0.580707	-0.10723	1.08843e-07	-0.391144	-0.190853	-0.112853
cg00966255	-320	p2@ATF7IP2	chr16:10479876..10479887,+	ATF7IP2	protein coding		0.805968	0.363328	0.44264	0.000113297	0.858841	0.643903	0.214938	4.99766e-19	0.856448	0.622201	0.234247	1.63086e-28	-0.296626	-0.361819	-0.16797
cg00966255	-320	p1@ATF7IP2	chr16:10479906..10479925,+	ATF7IP2	protein coding		0.805968	0.363328	0.44264	0.000113297	0.858841	0.643903	0.214938	4.99766e-19	0.856448	0.622201	0.234247	1.63086e-28	-0.296626	-0.361819	-0.16797
cg07950469	-1332	p1@HYDIN	chr16:71264580..71264638,-	HYDIN	protein coding		0.761755	0.43705	0.324705	0.0328809	0.852891	0.669295	0.183596	2.40271e-10	0.847319	0.645309	0.202011	2.40342e-14	0.311826	0.252449	0.0741667
cg26733669	-11	p@chr16:76269298..76269317,+	chr16:76269298..76269317,+		protein coding		0.777183	0.521837	0.255347	0.046933	0.821963	0.650742	0.171221	6.30226e-10	0.815328	0.577822	0.237506	7.94005e-22	NA	NA	NA
cg05273533	-1226	p@chr16:86469492..86469500,-	chr16:86469492..86469500,-	RP11-158I3.1	pseudogene	SINE/MIR	0.651835	0.291319	0.360516	0.000604848	0.802066	0.558126	0.243941	8.89914e-19	0.788582	0.470526	0.318055	1.22542e-38	NA	0.0572643	0.042828
cg04604142	-459	p1@LUC7L3	chr17:48796951..48796996,+	LUC7L3	protein coding		0.475795	0.230765	0.24503	0.0143458	0.777093	0.411008	0.366085	2.18266e-38	0.743379	0.400546	0.342832	4.54397e-41	0.0333754	-0.194174	-0.220897
cg14897188	444	p3@RNASEK	chr17:6916726..6916756,+	RNASEK	protein coding		0.720163	0.296822	0.423342	0.000144884	0.617234	0.41878	0.198454	5.42817e-21	0.614138	0.424659	0.189479	1.14214e-22	-0.344243	-0.0291163	0.0615137
cg08739828	-1400	p@chr18:33766737..33766750,-	chr18:33766737..33766750,-	RP11-49I11.1	antisense		0.530408	0.246311	0.284098	0.0198851	0.537965	0.438401	0.0995638	8.6729e-06	0.539236	0.495232	0.0440037	0.0965626	NA	NA	NA
cg08739828	-1400	p2@uc002kzp.2	chr18:33767331..33767359,-	RP11-49I11.1	antisense		0.530408	0.246311	0.284098	0.0198851	0.537965	0.438401	0.0995638	8.6729e-06	0.539236	0.495232	0.0440037	0.0965626	NA	-0.136317	-0.318565
cg27485084	-410	p5@SYT4	chr18:40857274..40857292,-	SYT4	protein coding		0.643597	0.374854	0.268743	0.0488769	0.699009	0.664232	0.034777	0.153458	0.677841	0.635431	0.0424104	0.0882783	0.19448	0.0219796	0.0667633
cg27485084	-410	p2@SYT4	chr18:40857329..40857357,-	SYT4	protein coding		0.643597	0.374854	0.268743	0.0488769	0.699009	0.664232	0.034777	0.153458	0.677841	0.635431	0.0424104	0.0882783	0.19448	0.0219796	0.0667633
cg27485084	-410	p6@SYT4	chr18:40857368..40857384,-	SYT4	protein coding		0.643597	0.374854	0.268743	0.0488769	0.699009	0.664232	0.034777	0.153458	0.677841	0.635431	0.0424104	0.0882783	0.19448	0.0219796	0.0667633
cg27485084	-410	p3@SYT4	chr18:40857389..40857405,-	SYT4	protein coding		0.643597	0.374854	0.268743	0.0488769	0.699009	0.664232	0.034777	0.153458	0.677841	0.635431	0.0424104	0.0882783	0.19448	0.0219796	0.0667633
cg27485084	-410	p10@SYT4	chr18:40857413..40857422,-	SYT4	protein coding		0.643597	0.374854	0.268743	0.0488769	0.699009	0.664232	0.034777	0.153458	0.677841	0.635431	0.0424104	0.0882783	0.19448	0.0219796	0.0667633
cg27485084	-410	p1@SYT4	chr18:40857447..40857461,-	SYT4	protein coding		0.643597	0.374854	0.268743	0.0488769	0.699009	0.664232	0.034777	0.153458	0.677841	0.635431	0.0424104	0.0882783	0.19448	0.0219796	0.0667633
cg27485084	-410	p4@SYT4	chr18:40857493..40857505,-	SYT4	protein coding		0.643597	0.374854	0.268743	0.0488769	0.699009	0.664232	0.034777	0.153458	0.677841	0.635431	0.0424104	0.0882783	0.19448	0.0219796	0.0667633
cg20143859	-380	p4@SEC11C	chr18:56806701..56806745,+	SEC11C	protein coding		0.494218	0.243617	0.250602	0.0180216	0.733229	0.595473	0.137756	4.35534e-08	0.733687	0.488991	0.244696	4.09158e-24	-0.035098	-0.192352	0.173293
cg20143859	-380	p1@SEC11C	chr18:56807096..56807175,+	SEC11C	protein coding		0.494218	0.243617	0.250602	0.0180216	0.733229	0.595473	0.137756	4.35534e-08	0.733687	0.488991	0.244696	4.09158e-24	-0.035098	-0.192352	0.173293
cg19952821	-989	p1@SERPINB11	chr18:61370192..61370197,+	SERPINB11	other		0.816337	0.426853	0.389484	0.00113648	0.841377	0.612614	0.228763	2.9265e-13	0.837171	0.704296	0.132874	3.45027e-08	NA	0.155513	0.215512
cg01500844	-88	p1@RGL3	chr19:11529980..11529998,-	RGL3	protein coding	Simple repeat	0.788063	0.35606	0.432004	0.00205328	0.02512	0.163988	-0.138868	2.71724e-07	0.0243171	0.3035	-0.279183	2.56426e-11	-0.321793	0.122166	-0.0944333
cg02433671	116	p1@RGL3	chr19:11529980..11529998,-	RGL3	protein coding	Simple repeat	0.696552	0.144012	0.552539	1.89169e-05	0.0563768	0.0670695	-0.0106927	0.247249	0.0477498	0.285267	-0.237517	2.19628e-11	-0.186625	-0.0883292	-0.199884
cg08000684	-53	p1@RGL3	chr19:11529980..11529998,-	RGL3	protein coding	Simple repeat	0.854915	0.146255	0.70866	1.752e-08	0.0400706	0.0513421	-0.0112714	0.433495	0.0385612	0.355237	-0.316676	3.49599e-10	-0.339629	0.0487283	-0.132486
cg08068820	-49	p1@RGL3	chr19:11529980..11529998,-	RGL3	protein coding	Simple repeat	0.849945	0.142722	0.707223	1.0396e-07	0.0330305	0.0588976	-0.0258672	0.0624858	0.0431916	0.363806	-0.320614	8.36227e-11	-0.284629	0.0553154	-0.186361
cg08198862	25	p1@RGL3	chr19:11529980..11529998,-	RGL3	protein coding	Simple repeat	0.729367	0.158339	0.571027	2.09176e-07	0.18066	0.20894	-0.0282804	0.0296086	0.175415	0.402962	-0.227547	2.70295e-17	-0.360546	-0.229909	-0.278873
cg14913644	-93	p1@RGL3	chr19:11529980..11529998,-	RGL3	protein coding	Simple repeat	0.704597	0.127551	0.577045	1.78584e-06	0.0220174	0.0350844	-0.013067	0.171875	0.0223066	0.260199	-0.237892	9.23066e-09	-0.196407	0.122084	-0.105035
cg15610202	-1312	p1@MIR7-3HG	chr19:4769143..4769147,+	MIR7-3HG	linc		0.790793	0.536785	0.254008	0.0309397	0.919023	0.783405	0.135618	5.20262e-07	0.921486	0.657124	0.264362	2.35121e-20	NA	-0.0592942	0.039108
cg26610167	-3	p2@PTPRH	chr19:55720826..55720849,-	PTPRH	protein coding		0.754392	0.460166	0.294226	0.0461163	0.787674	0.50704	0.280634	3.44983e-31	0.777939	0.549613	0.228327	2.0115e-19	-0.252023	-0.212518	-0.113083
cg26610167	-3	p1@PTPRH	chr19:55720862..55720880,-	PTPRH	protein coding		0.754392	0.460166	0.294226	0.0461163	0.787674	0.50704	0.280634	3.44983e-31	0.777939	0.549613	0.228327	2.0115e-19	-0.252023	-0.212518	-0.113083
cg26954695	499	p@chr19:59085102..59085126,+	chr19:59085102..59085126,+	RPL23AP79	pseudogene	Low complexity	0.86404	0.433146	0.430894	0.00965746	0.85384	0.662594	0.191247	1.80409e-07	0.871678	0.525296	0.346383	4.28134e-29	-0.281737	NA	NA
cg00603435	-831	p1@LRP1B	chr2:142888525..142888547,-	LRP1B	protein coding		0.799845	0.381155	0.41869	0.00657274	0.589317	0.485848	0.103469	0.00344639	0.602768	0.313513	0.289255	1.99404e-29	-0.443983	-0.302842	-0.44715
cg00821600	-848	p1@LRP1B	chr2:142888525..142888547,-	LRP1B	protein coding		0.745488	0.410297	0.335192	0.0112842	0.575891	0.493862	0.0820288	0.00482534	0.584514	0.366028	0.218485	4.96775e-21	-0.392289	-0.238289	-0.412807
cg02488702	-856	p1@LRP1B	chr2:142888525..142888547,-	LRP1B	protein coding		0.818928	0.478593	0.340335	0.0129644	0.719949	0.637918	0.082031	0.00902489	0.70715	0.481131	0.226019	2.27373e-17	-0.412905	-0.315211	-0.431632
cg00603435	-831	p2@LRP1B	chr2:142888550..142888567,-	LRP1B	protein coding		0.799845	0.381155	0.41869	0.00657274	0.589317	0.485848	0.103469	0.00344639	0.602768	0.313513	0.289255	1.99404e-29	-0.443983	-0.302842	-0.44715
cg00821600	-848	p2@LRP1B	chr2:142888550..142888567,-	LRP1B	protein coding		0.745488	0.410297	0.335192	0.0112842	0.575891	0.493862	0.0820288	0.00482534	0.584514	0.366028	0.218485	4.96775e-21	-0.392289	-0.238289	-0.412807
cg02488702	-856	p2@LRP1B	chr2:142888550..142888567,-	LRP1B	protein coding		0.818928	0.478593	0.340335	0.0129644	0.719949	0.637918	0.082031	0.00902489	0.70715	0.481131	0.226019	2.27373e-17	-0.412905	-0.315211	-0.431632
cg00603435	-831	p3@LRP1B	chr2:142888573..142888591,-	LRP1B	protein coding		0.799845	0.381155	0.41869	0.00657274	0.589317	0.485848	0.103469	0.00344639	0.602768	0.313513	0.289255	1.99404e-29	-0.443983	-0.302842	-0.44715
cg00821600	-848	p3@LRP1B	chr2:142888573..142888591,-	LRP1B	protein coding		0.745488	0.410297	0.335192	0.0112842	0.575891	0.493862	0.0820288	0.00482534	0.584514	0.366028	0.218485	4.96775e-21	-0.392289	-0.238289	-0.412807
cg02488702	-856	p3@LRP1B	chr2:142888573..142888591,-	LRP1B	protein coding		0.818928	0.478593	0.340335	0.0129644	0.719949	0.637918	0.082031	0.00902489	0.70715	0.481131	0.226019	2.27373e-17	-0.412905	-0.315211	-0.431632
cg08042220	-949	p1@GALNT13	chr2:154728427..154728440,+	GALNT13	protein coding		0.692302	0.373394	0.318907	0.0234475	0.674112	0.525697	0.148415	1.04968e-08	0.652923	0.47412	0.178803	3.17608e-14	-0.0883902	-0.108417	-0.277596
cg23497644	-543	p1@SSB	chr2:170655351..170655405,+	SSB	protein coding		0.447411	0.181476	0.265934	0.00193871	0.580038	0.337983	0.242056	5.70811e-29	0.570269	0.309106	0.261163	5.90186e-40	-0.21554	-0.22808	-0.459206
cg23497644	-543	p3@SSB	chr2:170655408..170655416,+	SSB	protein coding		0.447411	0.181476	0.265934	0.00193871	0.580038	0.337983	0.242056	5.70811e-29	0.570269	0.309106	0.261163	5.90186e-40	-0.21554	-0.22808	-0.459206
cg23497644	-543	p2@SSB	chr2:170655418..170655430,+	SSB	protein coding		0.447411	0.181476	0.265934	0.00193871	0.580038	0.337983	0.242056	5.70811e-29	0.570269	0.309106	0.261163	5.90186e-40	-0.21554	-0.22808	-0.459206
cg19303187	-1252	p1@DLX2	chr2:172967621..172967637,-	DLX2	protein coding		0.391789	0.151114	0.240675	4.07261e-06	0.255951	0.183248	0.0727026	2.93943e-05	0.236319	0.158107	0.0782121	7.99262e-13	-0.210803	-0.0812286	-0.120402
cg11237792	-598	p1@TTC30A	chr2:178483435..178483485,-	TTC30A	protein coding		0.617567	0.238912	0.378655	2.67191e-05	0.52864	0.389807	0.138833	3.60278e-08	0.520385	0.339431	0.180954	3.81089e-19	-0.131994	-0.152224	-0.302793
cg02561726	423	p2@DUSP19	chr2:183943499..183943530,+	DUSP19	protein coding		0.467925	0.131603	0.336322	2.63277e-06	0.142221	0.0776646	0.0645568	1.95124e-06	0.110539	0.0646912	0.0458476	4.19566e-10	-0.333292	0.0309744	-0.160092
cg13038560	-1180	p2@C2orf47	chr2:200820269..200820317,+	C2orf47	protein coding		0.652303	0.280582	0.371721	0.00554874	0.767385	0.554179	0.213206	5.49276e-16	0.742609	0.515306	0.227303	4.33678e-20	-0.171799	-0.37121	-0.48503
cg13038560	-1180	p4@C2orf47	chr2:200820477..200820488,+	C2orf47	protein coding		0.652303	0.280582	0.371721	0.00554874	0.767385	0.554179	0.213206	5.49276e-16	0.742609	0.515306	0.227303	4.33678e-20	-0.171799	-0.37121	-0.48503
cg13038560	-1180	p1@C2orf47	chr2:200820494..200820550,+	C2orf47	protein coding		0.652303	0.280582	0.371721	0.00554874	0.767385	0.554179	0.213206	5.49276e-16	0.742609	0.515306	0.227303	4.33678e-20	-0.171799	-0.37121	-0.48503
cg20608990	-582	p2@CASP8	chr2:202098175..202098202,+	CASP8	protein coding		0.764447	0.293035	0.471412	0.000135739	0.600896	0.342364	0.258532	1.5182e-27	0.578671	0.338569	0.240103	1.42724e-33	-0.337353	-0.0834378	-0.212771
cg20608990	-582	p3@CASP8	chr2:202098203..202098256,+	CASP8	protein coding		0.764447	0.293035	0.471412	0.000135739	0.600896	0.342364	0.258532	1.5182e-27	0.578671	0.338569	0.240103	1.42724e-33	-0.337353	-0.0834378	-0.212771
cg20435238	-65	p1@MYT1L	chr2:2334997..2335053,-	MYT1L	protein coding		0.828448	0.513312	0.315136	0.0296644	0.897074	0.818877	0.0781971	0.00191483	0.896171	0.7108	0.185371	1.43324e-12	-0.0736631	-0.0688253	-0.102138
cg14070755	-119	p4@MLPH	chr2:238395803..238395816,+	MLPH	protein coding		0.608513	0.310488	0.298026	0.0364351	0.306072	0.314387	-0.00831533	0.652623	0.285209	0.487905	-0.202695	1.02417e-15	-0.784675	-0.43896	-0.186167
cg14070755	-119	p1@MLPH	chr2:238395879..238395975,+	MLPH	protein coding	Simple repeat	0.608513	0.310488	0.298026	0.0364351	0.306072	0.314387	-0.00831533	0.652623	0.285209	0.487905	-0.202695	1.02417e-15	-0.784675	-0.43896	-0.186167
cg06353069	-708	p1@RAB17	chr2:238499337..238499408,-	RAB17	protein coding		0.73112	0.320358	0.410762	0.0040277	0.634154	0.392921	0.241233	5.66506e-34	0.599503	0.488337	0.111166	3.12384e-06	-0.635525	-0.352156	-0.479528
cg05870586	-382	p@chr2:240196457..240196486,-	chr2:240196457..240196486,-	HDAC4	protein coding gene body		0.558948	0.24218	0.316768	0.0325095	0.539813	0.313626	0.226187	2.5398e-22	0.501622	0.253433	0.248188	1.2994e-40	-0.561352	-0.0451543	-0.12176
cg08565197	-867	p@chr2:240196457..240196486,-	chr2:240196457..240196486,-	HDAC4	protein coding gene body		0.611443	0.289501	0.321942	0.0270224	0.642313	0.418379	0.223935	4.09839e-23	0.610407	0.333886	0.276521	6.13987e-45	-0.51558	-0.142015	-0.283499
cg01738095	-492	p1@ASXL2	chr2:26101314..26101363,-	ASXL2	protein coding		0.706138	0.289068	0.417071	5.70729e-05	0.618684	0.432396	0.186288	6.32208e-12	0.615075	0.353101	0.261974	1.24126e-40	0.411117	-0.0677422	-0.0646989
cg08239375	-1313	p6@SUPT7L	chr2:27886228..27886239,-	SUPT7L	protein coding		0.839392	0.486293	0.353099	0.0126218	0.769366	0.610829	0.158537	4.86126e-08	0.745878	0.52869	0.217188	1.12267e-17	0.0670276	-0.242712	-0.171688
cg08239375	-1313	p3@SUPT7L	chr2:27886258..27886282,-	SUPT7L	protein coding		0.839392	0.486293	0.353099	0.0126218	0.769366	0.610829	0.158537	4.86126e-08	0.745878	0.52869	0.217188	1.12267e-17	0.0670276	-0.242712	-0.171688
cg04748828	-280	p@chr2:75186022..75186034,-	chr2:75186022..75186034,-		linc		0.90737	0.680236	0.227134	0.0360263	0.897393	0.75272	0.144674	1.03159e-06	0.900292	0.655162	0.24513	1.2414e-19	NA	NA	NA
cg10973622	-1163	p2@IMMT	chr2:86422618..86422629,-	IMMT	protein coding		0.509722	0.270685	0.239037	0.0123619	0.567096	0.509776	0.0573198	0.0981232	0.570244	0.386837	0.183407	1.04138e-12	0.102772	-0.303178	-0.376361
cg00075467	-504	p1@TAF1B	chr2:9983555..9983641,+	TAF1B	protein coding		0.625025	0.366624	0.258401	0.0336044	0.578993	0.474756	0.104238	1.44527e-05	0.551986	0.37735	0.174636	1.35914e-18	-0.279584	-0.250401	-0.424065
cg19333980	-987	p6@C20orf30	chr20:5093431..5093460,-	TMEM230	protein coding		0.565247	0.281698	0.283549	0.021963	0.52657	0.375594	0.150977	5.51352e-13	0.510747	0.308494	0.202253	2.17144e-34	0.112	-0.335354	-0.274875
cg19333980	-987	p3@C20orf30	chr20:5093673..5093697,-	TMEM230	protein coding		0.565247	0.281698	0.283549	0.021963	0.52657	0.375594	0.150977	5.51352e-13	0.510747	0.308494	0.202253	2.17144e-34	0.112	-0.335354	-0.274875
cg11940960	-1473	p1@SON	chr21:34915337..34915397,+	SON	protein coding		0.433912	0.158699	0.275213	0.000731211	0.299525	0.180287	0.119238	2.0192e-13	0.271325	0.159025	0.112301	5.75057e-28	-0.347934	0.06363	0.0607844
cg27303185	137	p2@PRAME	chr22:22900001..22900057,-	PRAME	protein coding	Low complexity	0.756503	0.371442	0.385061	0.0301748	0.894857	0.676348	0.21851	4.51402e-09	0.891674	0.442478	0.449196	1.96077e-39	-0.848647	-0.717689	-0.59934
cg11225751	-257	p3@PRAME	chr22:22901414..22901437,-	PRAME	protein coding		0.357795	0.148303	0.209492	0.0489321	0.444877	0.289919	0.154958	1.06234e-08	0.392274	0.200176	0.192098	9.80085e-33	-0.814859	-0.546929	-0.322168
cg22871485	-426	p3@PRAME	chr22:22901414..22901437,-	PRAME	protein coding		0.665458	0.198035	0.467423	0.00113616	0.476851	0.364969	0.111882	4.12098e-05	0.413119	0.252052	0.161067	9.10299e-17	-0.771399	-0.682675	-0.535021
cg27303185	137	p3@PRAME	chr22:22901414..22901437,-	PRAME	protein coding		0.756503	0.371442	0.385061	0.0301748	0.894857	0.676348	0.21851	4.51402e-09	0.891674	0.442478	0.449196	1.96077e-39	-0.848647	-0.717689	-0.59934
cg11225751	-257	p5@PRAME	chr22:22901442..22901461,-	PRAME	protein coding		0.357795	0.148303	0.209492	0.0489321	0.444877	0.289919	0.154958	1.06234e-08	0.392274	0.200176	0.192098	9.80085e-33	-0.814859	-0.546929	-0.322168
cg22871485	-426	p5@PRAME	chr22:22901442..22901461,-	PRAME	protein coding		0.665458	0.198035	0.467423	0.00113616	0.476851	0.364969	0.111882	4.12098e-05	0.413119	0.252052	0.161067	9.10299e-17	-0.771399	-0.682675	-0.535021
cg27303185	137	p5@PRAME	chr22:22901442..22901461,-	PRAME	protein coding		0.756503	0.371442	0.385061	0.0301748	0.894857	0.676348	0.21851	4.51402e-09	0.891674	0.442478	0.449196	1.96077e-39	-0.848647	-0.717689	-0.59934
cg11225751	-257	p4@PRAME	chr22:22901477..22901499,-	PRAME	protein coding		0.357795	0.148303	0.209492	0.0489321	0.444877	0.289919	0.154958	1.06234e-08	0.392274	0.200176	0.192098	9.80085e-33	-0.814859	-0.546929	-0.322168
cg22871485	-426	p4@PRAME	chr22:22901477..22901499,-	PRAME	protein coding		0.665458	0.198035	0.467423	0.00113616	0.476851	0.364969	0.111882	4.12098e-05	0.413119	0.252052	0.161067	9.10299e-17	-0.771399	-0.682675	-0.535021
cg27303185	137	p4@PRAME	chr22:22901477..22901499,-	PRAME	protein coding		0.756503	0.371442	0.385061	0.0301748	0.894857	0.676348	0.21851	4.51402e-09	0.891674	0.442478	0.449196	1.96077e-39	-0.848647	-0.717689	-0.59934
cg11225751	-257	p1@PRAME	chr22:22901636..22901715,-	PRAME	protein coding		0.357795	0.148303	0.209492	0.0489321	0.444877	0.289919	0.154958	1.06234e-08	0.392274	0.200176	0.192098	9.80085e-33	-0.814859	-0.546929	-0.322168
cg22871485	-426	p1@PRAME	chr22:22901636..22901715,-	PRAME	protein coding		0.665458	0.198035	0.467423	0.00113616	0.476851	0.364969	0.111882	4.12098e-05	0.413119	0.252052	0.161067	9.10299e-17	-0.771399	-0.682675	-0.535021
cg27303185	137	p1@PRAME	chr22:22901636..22901715,-	PRAME	protein coding		0.756503	0.371442	0.385061	0.0301748	0.894857	0.676348	0.21851	4.51402e-09	0.891674	0.442478	0.449196	1.96077e-39	-0.848647	-0.717689	-0.59934
cg26683361	15	p4@SMTN	chr22:31460092..31460140,+	SMTN	protein coding	LTR/ERVL-MaLR	0.827997	0.605732	0.222264	0.0461369	0.81061	0.614243	0.196367	5.63581e-11	0.810559	0.555075	0.255484	6.35027e-21	-0.0100588	-0.140934	-0.0562521
cg25125450	142	p1@ENST00000434942	chr22:32601104..32601159,+	RP1-90G24.10	antisense	REP522	0.478518	0.144499	0.33402	0.00491224	0.756156	0.5216	0.234556	1.02582e-08	0.726388	0.387167	0.339221	3.20145e-25	-0.462213	-0.333756	-0.323413
cg26494441	-31	p1@ENST00000434942	chr22:32601104..32601159,+	RP1-90G24.10	antisense	REP522	0.604698	0.199794	0.404904	0.00562848	0.584331	0.547262	0.037069	0.0311108	0.578635	0.495759	0.0828767	5.88051e-10	-0.37102	-0.351656	-0.338028
cg10956848	191	p1@ENST00000426452,p2@uc003bij.2,p2@uc003bik.1	chr22:48027433..48027466,+	RP11-191L9.4	linc	LTR/ERVL	0.67236	0.228889	0.443471	0.00149835	0.957505	0.657936	0.299569	5.77772e-10	0.943996	0.399923	0.544073	8.24737e-39	-0.693965	NA	NA
cg14752348	276	p1@ENST00000426452,p2@uc003bij.2,p2@uc003bik.1	chr22:48027433..48027466,+	RP11-191L9.4	linc	LTR/ERVL	0.737715	0.422565	0.31515	0.0267824	0.870552	0.74045	0.130102	8.67006e-06	0.855647	0.522336	0.33331	3.28241e-26	-0.809716	NA	NA
cg10956848	191	p1@uc003bij.2,p1@uc003bik.1	chr22:48027489..48027535,+	RP11-191L9.4	linc	LTR/ERVL	0.67236	0.228889	0.443471	0.00149835	0.957505	0.657936	0.299569	5.77772e-10	0.943996	0.399923	0.544073	8.24737e-39	-0.693965	NA	NA
cg14752348	276	p1@uc003bij.2,p1@uc003bik.1	chr22:48027489..48027535,+	RP11-191L9.4	linc	LTR/ERVL	0.737715	0.422565	0.31515	0.0267824	0.870552	0.74045	0.130102	8.67006e-06	0.855647	0.522336	0.33331	3.28241e-26	-0.809716	NA	NA
cg10956848	191	p3@uc003bij.2,p3@uc003bik.1	chr22:48027545..48027576,+	RP11-191L9.4	linc	LTR/ERVL	0.67236	0.228889	0.443471	0.00149835	0.957505	0.657936	0.299569	5.77772e-10	0.943996	0.399923	0.544073	8.24737e-39	-0.693965	NA	NA
cg14752348	276	p3@uc003bij.2,p3@uc003bik.1	chr22:48027545..48027576,+	RP11-191L9.4	linc	LTR/ERVL	0.737715	0.422565	0.31515	0.0267824	0.870552	0.74045	0.130102	8.67006e-06	0.855647	0.522336	0.33331	3.28241e-26	-0.809716	NA	NA
cg17660833	-647	p2@HRH1	chr3:11267645..11267689,+	HRH1	protein coding	LINE/L2	0.6597	0.342265	0.317435	0.0365597	0.583081	0.422641	0.160439	7.90518e-10	0.552419	0.490187	0.0622324	0.0141776	-0.523947	-0.146164	-0.232688
cg00028135	-164	p11@ZBTB20	chr3:114343195..114343206,-	ZBTB20	protein coding	Low complexity	0.82419	0.304253	0.519937	0.000349259	0.498168	0.450936	0.0472314	0.0609491	0.476416	0.511971	-0.0355551	0.134812	NA	-0.161157	-0.12054
cg04564000	-769	p11@ZBTB20	chr3:114343195..114343206,-	ZBTB20	protein coding	Low complexity	0.78958	0.355218	0.434362	0.00810107	0.432795	0.477242	-0.0444478	0.175224	0.418546	0.457077	-0.0385313	0.182104	-0.253684	-0.128127	-0.0425197
cg00028135	-164	p1@ZBTB20	chr3:114343768..114343822,-	ZBTB20	protein coding	SINE/tRNA	0.82419	0.304253	0.519937	0.000349259	0.498168	0.450936	0.0472314	0.0609491	0.476416	0.511971	-0.0355551	0.134812	-0.351293	-0.161157	-0.12054
cg00028135	-164	p4@ZBTB20	chr3:114343826..114343869,-	ZBTB20	protein coding	SINE/tRNA	0.82419	0.304253	0.519937	0.000349259	0.498168	0.450936	0.0472314	0.0609491	0.476416	0.511971	-0.0355551	0.134812	-0.351293	-0.161157	-0.12054
cg00028135	-164	p@chr3:114343834..114343839,+	chr3:114343834..114343839,+		not annotated	SINE/tRNA	0.82419	0.304253	0.519937	0.000349259	0.498168	0.450936	0.0472314	0.0609491	0.476416	0.511971	-0.0355551	0.134812	NA	NA	NA
cg04564000	-769	p@chr3:114343834..114343839,+	chr3:114343834..114343839,+		not annotated	SINE/tRNA	0.78958	0.355218	0.434362	0.00810107	0.432795	0.477242	-0.0444478	0.175224	0.418546	0.457077	-0.0385313	0.182104	NA	NA	NA
cg00028135	-164	p9@ZBTB20	chr3:114343870..114343887,-	ZBTB20	protein coding	SINE/tRNA	0.82419	0.304253	0.519937	0.000349259	0.498168	0.450936	0.0472314	0.0609491	0.476416	0.511971	-0.0355551	0.134812	-0.351293	-0.161157	-0.12054
cg08832018	-461	p1@LEKR1	chr3:156544057..156544159,+	LEKR1	protein coding		0.7535	0.437997	0.315503	0.00978427	0.539951	0.371186	0.168765	1.86651e-15	0.523789	0.334863	0.188926	7.1531e-20	-0.138823	-0.0981818	-0.202663
cg04337056	-503	p1@GFM1	chr3:158362299..158362422,+	GFM1	protein coding		0.77706	0.412483	0.364577	0.00276586	0.866292	0.791624	0.0746689	0.0033815	0.843926	0.72493	0.118996	1.82538e-06	-0.0156572	-0.228006	-0.191421
cg24147596	473	p1@ARL14	chr3:160394940..160394954,+	ARL14	protein coding		0.762193	0.318618	0.443575	0.00231126	0.81393	0.66184	0.15209	3.58717e-07	0.80494	0.615131	0.189809	1.18557e-12	-0.656967	-0.478712	-0.532321
cg24147596	473	p2@ARL14	chr3:160394961..160394996,+	ARL14	protein coding		0.762193	0.318618	0.443575	0.00231126	0.81393	0.66184	0.15209	3.58717e-07	0.80494	0.615131	0.189809	1.18557e-12	-0.656967	-0.478712	-0.532321
cg17024257	-319	p1@PLD1	chr3:171528227..171528298,-	PLD1	protein coding	Simple repeat	0.885248	0.593153	0.292095	0.0270892	0.802152	0.628096	0.174055	3.25303e-08	0.793914	0.548974	0.24494	8.73248e-14	-0.346766	-0.349121	-0.00972207
cg01271129	295	p1@LRRFIP1P1	chr3:178979208..178979225,-	LRRFIP1P1	pseudogene		0.614195	0.258066	0.356129	0.000551674	0.394731	0.303126	0.0916046	5.68956e-10	0.375473	0.252442	0.12303	8.0112e-22	NA	-0.459818	-0.558434
cg06341047	-508	p1@ENST00000483525,p1@uc003dog.2	chr3:70048881..70048888,+	RP11-460N16.1	linc	LTR/ERV1	0.568497	0.287214	0.281283	0.00308435	0.654079	0.488189	0.16589	8.43998e-11	0.635499	0.551499	0.0839991	0.000610437	-0.503398	NA	NA
cg02130040	-246	p1@LOC100288428	chr3:8543319..8543388,-	LMCD1-AS1	antisense		0.301497	0.0915126	0.209984	3.50948e-05	0.0554862	0.0633465	-0.00786037	0.356708	0.0510075	0.0565198	-0.00551231	0.147967	-0.0185487	NA	NA
cg06606539	-503	p1@MIR572	chr4:11370223..11370243,+	MIR572	small ncRNAs	Simple repeat	0.804088	0.268513	0.535576	3.32325e-08	0.781128	0.529575	0.251553	2.43296e-20	0.755367	0.619674	0.135693	2.03916e-09	-0.0585722	-0.0557159	0.104676
cg18184033	-936	p@chr4:16944250..16944268,+	chr4:16944250..16944268,+		not annotated	LTR/ERVL-MaLR	0.829302	0.502519	0.326783	0.0133768	0.937362	0.755679	0.181683	3.5713e-09	0.923836	0.812834	0.111003	4.32065e-07	NA	NA	NA
cg16854281	-29	p1@LOC401164	chr4:189376725..189376740,+	LINC01060	linc		0.691328	0.408966	0.282362	0.0232468	0.516163	0.478866	0.0372969	0.299207	0.483033	0.478915	0.00411735	0.900393	-0.296633	NA	NA
cg27049827	-4	p1@LOC401164	chr4:189376725..189376740,+	LINC01060	linc		0.734578	0.468577	0.266001	0.0344142	0.578825	0.545473	0.0333521	0.293285	0.550223	0.546295	0.00392788	0.89212	-0.0584979	NA	NA
cg25740652	-1014	p8@LIMCH1	chr4:41361616..41361632,+	LIMCH1	protein coding	LTR/ERVL	0.865165	0.543075	0.32209	0.0387289	0.719005	0.583655	0.135351	6.42725e-08	0.722619	0.777888	-0.0552695	0.00290171	-0.327017	-0.470827	-0.14788
cg25740652	-1014	p19@LIMCH1	chr4:41361634..41361643,+	LIMCH1	protein coding	LTR/ERVL	0.865165	0.543075	0.32209	0.0387289	0.719005	0.583655	0.135351	6.42725e-08	0.722619	0.777888	-0.0552695	0.00290171	-0.327017	-0.470827	-0.14788
cg25740652	-1014	p4@LIMCH1	chr4:41362615..41362659,+	LIMCH1	protein coding		0.865165	0.543075	0.32209	0.0387289	0.719005	0.583655	0.135351	6.42725e-08	0.722619	0.777888	-0.0552695	0.00290171	-0.327017	-0.470827	-0.14788
cg25740652	-1014	p2@LIMCH1	chr4:41362776..41362792,+	LIMCH1	protein coding		0.865165	0.543075	0.32209	0.0387289	0.719005	0.583655	0.135351	6.42725e-08	0.722619	0.777888	-0.0552695	0.00290171	-0.327017	-0.470827	-0.14788
cg25740652	-1014	p1@LIMCH1	chr4:41362796..41362841,+	LIMCH1	protein coding		0.865165	0.543075	0.32209	0.0387289	0.719005	0.583655	0.135351	6.42725e-08	0.722619	0.777888	-0.0552695	0.00290171	-0.327017	-0.470827	-0.14788
cg25740652	-1014	p5@LIMCH1	chr4:41362846..41362859,+	LIMCH1	protein coding		0.865165	0.543075	0.32209	0.0387289	0.719005	0.583655	0.135351	6.42725e-08	0.722619	0.777888	-0.0552695	0.00290171	-0.327017	-0.470827	-0.14788
cg14906103	433	p@chr4:41936411..41936427,+	chr4:41936411..41936427,+		protein coding	LTR/ERV1	0.887885	0.446262	0.441623	0.00383181	0.760024	0.516586	0.243438	1.16889e-15	0.752323	0.517654	0.23467	2.45592e-21	NA	NA	NA
cg25806704	444	p@chr4:41936411..41936427,+	chr4:41936411..41936427,+		protein coding	LTR/ERV1	0.793925	0.342746	0.451179	0.00196571	0.721814	0.492422	0.229393	4.64198e-15	0.713559	0.487025	0.226534	3.06996e-21	NA	NA	NA
cg10910685	-256	p1@COX7B2	chr4:46911255..46911270,-	COX7B2	protein coding	LTR/ERVL	0.821932	0.586232	0.235699	0.0379313	0.918488	0.770409	0.148079	3.06103e-07	0.912311	0.697926	0.214384	2.63871e-17	-0.217345	-0.412228	-0.408349
cg26636590	-111	p1@COX7B2	chr4:46911255..46911270,-	COX7B2	protein coding	LTR/ERVL	0.704193	0.402726	0.301467	0.00455191	0.877595	0.649208	0.228386	8.32946e-13	0.858667	0.576083	0.282584	1.13931e-26	-0.226562	-0.397571	-0.273494
cg01882498	-973	p1@LIN54	chr4:83933999..83934076,-	LIN54	protein coding		0.535277	0.151507	0.383769	1.45806e-13	0.315409	0.254632	0.0607772	0.00071371	0.280632	0.235195	0.0454376	0.00135498	-0.0053216	-0.0801983	-0.292822
cg17315844	-1243	p2@CCT5	chr5:10250349..10250362,+	CCT5	protein coding		0.846013	0.393333	0.45268	5.38472e-05	0.870951	0.499668	0.371282	1.04677e-29	0.867898	0.438356	0.429542	8.63284e-50	-0.200037	-0.409295	-0.326642
cg17315844	-1243	p3@CCT5	chr5:10250363..10250374,+	CCT5	protein coding		0.846013	0.393333	0.45268	5.38472e-05	0.870951	0.499668	0.371282	1.04677e-29	0.867898	0.438356	0.429542	8.63284e-50	-0.200037	-0.409295	-0.326642
cg17315844	-1243	p1@CCT5	chr5:10250384..10250450,+	CCT5	protein coding		0.846013	0.393333	0.45268	5.38472e-05	0.870951	0.499668	0.371282	1.04677e-29	0.867898	0.438356	0.429542	8.63284e-50	-0.200037	-0.409295	-0.326642
cg00665650	-761	p1@PAIP2	chr5:138677515..138677581,+	PAIP2	protein coding		0.665743	0.304196	0.361548	2.2932e-05	0.415897	0.247431	0.168466	6.97996e-25	0.367316	0.228001	0.139315	2.48486e-30	0.253376	-0.00891234	-0.15732
cg19414040	-638	p1@HMP19	chr5:173472676..173472732,+	NSG2	protein coding		0.635537	0.249183	0.386353	0.000261725	0.728848	0.596096	0.132751	8.42629e-08	0.739477	0.647323	0.0921545	8.86981e-05	0.0777297	0.0318585	0.0738048
cg25494605	-607	p1@HMP19	chr5:173472676..173472732,+	NSG2	protein coding		0.330013	0.123504	0.206509	0.0015305	0.575992	0.450169	0.125823	4.85543e-09	0.580059	0.473499	0.10656	1.95225e-08	0.106267	0.00967594	0.112202
cg19414040	-638	p2@HMP19	chr5:173472744..173472756,+	NSG2	protein coding		0.635537	0.249183	0.386353	0.000261725	0.728848	0.596096	0.132751	8.42629e-08	0.739477	0.647323	0.0921545	8.86981e-05	0.0777297	0.0318585	0.0738048
cg25494605	-607	p2@HMP19	chr5:173472744..173472756,+	NSG2	protein coding		0.330013	0.123504	0.206509	0.0015305	0.575992	0.450169	0.125823	4.85543e-09	0.580059	0.473499	0.10656	1.95225e-08	0.106267	0.00967594	0.112202
cg07784793	169	p@chr5:33794876..33794902,-	chr5:33794876..33794902,-	ADAMTS12	protein coding gene body		0.889115	0.640886	0.248229	0.0240195	0.908724	0.741969	0.166755	1.1096e-06	0.896073	0.674368	0.221705	6.1357e-12	0.297189	-0.017983	0.152615
cg07784793	169	p@chr5:33794904..33794916,-	chr5:33794904..33794916,-	ADAMTS12	protein coding gene body		0.889115	0.640886	0.248229	0.0240195	0.908724	0.741969	0.166755	1.1096e-06	0.896073	0.674368	0.221705	6.1357e-12	0.297189	-0.017983	0.152615
cg07784793	169	p@chr5:33794920..33794939,-	chr5:33794920..33794939,-	ADAMTS12	protein coding gene body		0.889115	0.640886	0.248229	0.0240195	0.908724	0.741969	0.166755	1.1096e-06	0.896073	0.674368	0.221705	6.1357e-12	0.297189	-0.017983	0.152615
cg13700051	-480	p1@TTC33	chr5:40755987..40756077,-	TTC33	protein coding		0.876438	0.588922	0.287516	0.00772601	0.845159	0.649583	0.195576	4.14772e-09	0.861944	0.612579	0.249364	2.22716e-22	-0.207789	-0.278004	-0.298039
cg04122815	184	p1@AB463523	chr5:43040003..43040051,-	ANXA2R	protein coding gene body		0.873573	0.20283	0.670744	2.52377e-07	0.478022	0.273953	0.204069	2.26348e-12	0.443299	0.232554	0.210745	1.20661e-19	-0.588053	-0.225033	-0.0390755
cg08205639	21	p1@AB463523	chr5:43040003..43040051,-	ANXA2R	protein coding gene body		0.531997	0.232854	0.299143	0.0158038	0.291658	0.204108	0.08755	0.00181803	0.262468	0.170772	0.0916963	4.09706e-05	-0.616977	-0.263378	-0.0421194
cg10938702	328	p1@AB463523	chr5:43040003..43040051,-	ANXA2R	protein coding gene body		0.673733	0.216612	0.457121	8.81588e-05	0.261902	0.215801	0.0461009	0.0544835	0.244778	0.186217	0.0585616	0.00218231	-0.5277	-0.191778	-0.0527915
cg08205639	21	p3@C5orf39	chr5:43040187..43040202,-	ANXA2R	protein coding		0.531997	0.232854	0.299143	0.0158038	0.291658	0.204108	0.08755	0.00181803	0.262468	0.170772	0.0916963	4.09706e-05	-0.616977	-0.263378	-0.0421194
cg10938702	328	p3@C5orf39	chr5:43040187..43040202,-	ANXA2R	protein coding		0.673733	0.216612	0.457121	8.81588e-05	0.261902	0.215801	0.0461009	0.0544835	0.244778	0.186217	0.0585616	0.00218231	-0.5277	-0.191778	-0.0527915
cg08205639	21	p2@C5orf39	chr5:43040442..43040486,-	ANXA2R	protein coding		0.531997	0.232854	0.299143	0.0158038	0.291658	0.204108	0.08755	0.00181803	0.262468	0.170772	0.0916963	4.09706e-05	-0.616977	-0.263378	-0.0421194
cg06434454	79	p1@ADAMTS16	chr5:5146295..5146366,+	ADAMTS16	protein coding gene body		0.915653	0.396956	0.518697	0.00248009	0.986474	0.675676	0.310799	2.35081e-13	0.981656	0.652721	0.328935	8.97212e-19	-0.625467	-0.152104	0.0199267
cg17627328	102	p1@ADAMTS16	chr5:5146295..5146366,+	ADAMTS16	protein coding gene body		0.692655	0.175546	0.517109	2.28565e-06	0.865766	0.49908	0.366686	3.07629e-24	0.844551	0.421877	0.422674	4.68234e-44	-0.429488	-0.0792778	0.312856
cg15556672	-562	p2@MRPS36	chr5:68513622..68513665,+	MRPS36	protein coding		0.677745	0.280615	0.39713	4.35903e-05	0.634813	0.390594	0.244219	9.22365e-25	0.591128	0.366541	0.224586	1.06252e-30	-0.0369436	-0.322508	-0.0537215
cg20672187	-597	p7@TMEM200A	chr6:130686664..130686693,+	TMEM200A	protein coding		0.718482	0.416885	0.301597	0.0163101	0.680085	0.616404	0.0636812	0.0146658	0.656991	0.561043	0.0959477	1.92291e-05	-0.0525448	0.279207	0.286516
cg00836641	-777	p1@PPIL4	chr6:149867122..149867201,-	PPIL4	protein coding		0.838745	0.577602	0.261143	0.0298669	0.932943	0.779115	0.153828	1.97711e-06	0.892005	0.686351	0.205654	7.19908e-11	-0.163924	-0.071646	-0.0805694
cg00061811	-179	p@chr6:170475650..170475682,-	chr6:170475650..170475682,-		linc		0.47429	0.2185	0.25579	0.0147398	0.916157	0.698119	0.218038	7.88765e-15	0.900246	0.518422	0.381823	5.31205e-61	NA	NA	NA
cg11123018	-1315	p1@SCGN	chr6:25652432..25652485,+	SCGN	protein coding		0.653245	0.345503	0.307742	0.0219056	0.886069	0.676812	0.209258	9.59401e-11	0.870108	0.565904	0.304204	9.83144e-28	0.227078	0.185575	0.129598
cg12584100	-397	p2@HTATSF1P2	chr6:3024085..3024106,-	HTATSF1P2	pseudogene		0.635947	0.310423	0.325523	0.0497954	0.407743	0.300836	0.106907	0.00193786	0.362879	0.285607	0.0772723	0.0119435	NA	NA	NA
cg12584100	-397	p1@HTATSF1P2	chr6:3024117..3024200,-	HTATSF1P2	pseudogene		0.635947	0.310423	0.325523	0.0497954	0.407743	0.300836	0.106907	0.00193786	0.362879	0.285607	0.0772723	0.0119435	NA	NA	NA
cg20724257	115	p1@HLA-DRA	chr6:32407643..32407695,+	HLA-DRA	protein coding		0.600373	0.327928	0.272445	0.0203139	0.253849	0.200957	0.0528919	0.00159067	0.23893	0.22239	0.0165399	0.370491	-0.278066	-0.191915	-0.0658471
cg00798281	-284	p1@HLA-DPA1	chr6:33041386..33041439,-	HLA-DPA1	protein coding		0.707147	0.434967	0.27218	0.0161503	0.406917	0.312389	0.0945281	6.3599e-05	0.395644	0.350135	0.0455089	0.0582259	-0.162867	-0.270279	-0.0409357
cg12865025	-1138	p1@HLA-DPA1	chr6:33041386..33041439,-	HLA-DPA1	protein coding		0.658763	0.379143	0.279621	0.00301399	0.910717	0.695806	0.214911	1.12013e-10	0.840873	0.544532	0.296341	7.42072e-27	0.188221	0.537623	0.529241
cg17217665	-159	p3@SLC29A1	chr6:44187265..44187308,+	SLC29A1	protein coding		0.515823	0.267901	0.247923	0.0185955	0.242203	0.153	0.0892036	3.86512e-15	0.215264	0.278867	-0.0636037	0.0017194	-0.431911	-0.23174	-0.0367408
cg17217665	-159	p4@SLC29A1	chr6:44187309..44187329,+	SLC29A1	protein coding		0.515823	0.267901	0.247923	0.0185955	0.242203	0.153	0.0892036	3.86512e-15	0.215264	0.278867	-0.0636037	0.0017194	-0.431911	-0.23174	-0.0367408
cg17217665	-159	p2@SLC29A1	chr6:44187334..44187387,+	SLC29A1	protein coding		0.515823	0.267901	0.247923	0.0185955	0.242203	0.153	0.0892036	3.86512e-15	0.215264	0.278867	-0.0636037	0.0017194	-0.431911	-0.23174	-0.0367408
cg00787780	-121	p@chr6:64151611..64151636,-	chr6:64151611..64151636,-		linc		0.812367	0.402051	0.410315	0.0271417	0.842097	0.618222	0.223875	2.90295e-12	0.841351	0.671211	0.17014	1.00396e-10	NA	NA	NA
cg03326410	-115	p@chr6:64151611..64151636,-	chr6:64151611..64151636,-		linc		0.857937	0.430644	0.427293	0.0158016	0.849203	0.592113	0.25709	8.44751e-14	0.851171	0.678287	0.172884	2.55102e-09	NA	NA	NA
cg00240178	-1338	p1@EEF1A1	chr6:74230741..74230799,-	EEF1A1	protein coding		0.762865	0.440576	0.322289	0.0257788	0.773737	0.484797	0.288939	7.70073e-26	0.749729	0.504221	0.245508	3.11686e-22	-0.280938	-0.0102913	-0.012139
cg00240178	-1338	p4@EEF1A1	chr6:74231273..74231302,-	EEF1A1	protein coding		0.762865	0.440576	0.322289	0.0257788	0.773737	0.484797	0.288939	7.70073e-26	0.749729	0.504221	0.245508	3.11686e-22	-0.280938	-0.0102913	-0.012139
cg22151713	-88	p2@SLC4A2	chr7:150759689..150759719,+	SLC4A2	protein coding		0.600612	0.264614	0.335998	0.0143006	0.604498	0.513931	0.0905669	0.000331398	0.613164	0.691938	-0.0787732	0.00132074	-0.17186	-0.27397	-0.276163
cg22168987	-424	p2@SLC4A2	chr7:150759689..150759719,+	SLC4A2	protein coding		0.70237	0.372917	0.329453	0.016821	0.537163	0.438453	0.0987093	3.24051e-05	0.557033	0.651421	-0.0943887	2.46515e-05	-0.409763	-0.331336	-0.320996
cg17067544	-910	p@chr7:22766225..22766236,+	chr7:22766225..22766236,+	IL6	protein coding gene body		0.824318	0.521062	0.303256	0.0214984	0.67865	0.505548	0.173102	3.29451e-06	0.639132	0.5403	0.0988321	0.00223944	-0.0148654	-0.0567721	0.131502
cg08939418	-1340	p1@IGF2BP3	chr7:23509977..23510032,-	IGF2BP3	protein coding	Low complexity	0.5858	0.219822	0.365978	0.00839836	0.575063	0.422843	0.15222	6.29033e-06	0.527362	0.286322	0.24104	7.442e-22	-0.400597	-0.704716	-0.606571
cg08939418	-1340	p2@IGF2BP3	chr7:23510088..23510118,-	IGF2BP3	protein coding		0.5858	0.219822	0.365978	0.00839836	0.575063	0.422843	0.15222	6.29033e-06	0.527362	0.286322	0.24104	7.442e-22	-0.400597	-0.704716	-0.606571
cg08939418	-1340	p7@IGF2BP3	chr7:23510430..23510452,-	IGF2BP3	protein coding		0.5858	0.219822	0.365978	0.00839836	0.575063	0.422843	0.15222	6.29033e-06	0.527362	0.286322	0.24104	7.442e-22	-0.400597	-0.704716	-0.606571
cg01378182	-102	p3@HECW1	chr7:43288717..43288757,+	HECW1	protein coding		0.398437	0.167292	0.231144	0.00296023	0.507556	0.355347	0.152209	1.94121e-20	0.485307	0.337697	0.147611	3.0265e-21	-0.460466	-0.082808	-0.0515357
cg05606455	20	p3@HECW1	chr7:43288717..43288757,+	HECW1	protein coding		0.622282	0.26212	0.360161	0.015008	0.653013	0.496768	0.156245	5.26877e-11	0.626936	0.441419	0.185517	9.79295e-20	-0.675855	-0.108093	-0.0664879
cg17544584	34	p3@HECW1	chr7:43288717..43288757,+	HECW1	protein coding		0.676388	0.275727	0.400661	0.00161624	0.707953	0.499694	0.208259	7.64469e-15	0.691676	0.443604	0.248072	3.53005e-25	-0.670041	-0.100959	-0.0557206
cg01378182	-102	p4@HECW1	chr7:43288941..43288960,+	HECW1	protein coding		0.398437	0.167292	0.231144	0.00296023	0.507556	0.355347	0.152209	1.94121e-20	0.485307	0.337697	0.147611	3.0265e-21	-0.460466	-0.082808	-0.0515357
cg05606455	20	p4@HECW1	chr7:43288941..43288960,+	HECW1	protein coding		0.622282	0.26212	0.360161	0.015008	0.653013	0.496768	0.156245	5.26877e-11	0.626936	0.441419	0.185517	9.79295e-20	-0.675855	-0.108093	-0.0664879
cg17544584	34	p4@HECW1	chr7:43288941..43288960,+	HECW1	protein coding		0.676388	0.275727	0.400661	0.00161624	0.707953	0.499694	0.208259	7.64469e-15	0.691676	0.443604	0.248072	3.53005e-25	-0.670041	-0.100959	-0.0557206
cg11594299	-717	p1@RADIL	chr7:4923315..4923360,-	RADIL	protein coding		0.585243	0.310732	0.274512	0.0155465	0.433358	0.379216	0.0541421	0.00406571	0.409106	0.363111	0.0459958	0.0101609	0.0144892	0.0324678	0.0542582
cg25283486	-725	p1@RADIL	chr7:4923315..4923360,-	RADIL	protein coding		0.559453	0.331602	0.227851	0.0309264	0.482688	0.407058	0.0756302	2.94252e-05	0.476586	0.402923	0.0736631	1.75215e-05	0.0746608	0.0703564	0.0546653
cg00347856	376	p1@FLJ45974	chr7:53879623..53879635,-	GS1-179L18.1	linc	LTR/ERVL	0.768655	0.432621	0.336034	0.00960874	0.900227	0.707401	0.192826	1.14119e-08	0.901742	0.673631	0.228111	2.43936e-15	-0.65451	-0.515534	-0.515774
cg08311085	207	p1@FLJ45974	chr7:53879623..53879635,-	GS1-179L18.1	linc	LTR/ERVL	0.630402	0.370308	0.260094	0.0245567	0.880257	0.631042	0.249215	4.58074e-13	0.864168	0.590741	0.273428	4.48594e-21	-0.661928	-0.500223	-0.512124
cg11129772	-99	p1@FLJ45974	chr7:53879623..53879635,-	GS1-179L18.1	linc	LTR/ERVL	0.602075	0.295657	0.306418	0.00436483	0.842421	0.539793	0.302628	8.32621e-17	0.822467	0.51748	0.304986	5.8566e-22	-0.53278	-0.370851	-0.399548
cg01098474	-1131	p1@ZNF716	chr7:57509877..57509895,+	ZNF716	protein coding		0.490722	0.265208	0.225514	0.00565312	0.761381	0.556875	0.204505	3.86143e-10	0.745286	0.455124	0.290162	2.06723e-28	0.00747232	-0.24127	-0.165008
cg09299053	-124	p1@ZNF716	chr7:57509877..57509895,+	ZNF716	protein coding		0.76313	0.34133	0.4218	0.00142959	0.842125	0.648957	0.193168	1.40284e-08	0.845067	0.558672	0.286394	2.15257e-24	-0.117919	-0.272412	-0.232105
cg03605686	-616	p1@PON1,p1@PON3	chr7:95025661..95025712,-	PON1	protein coding		0.87943	0.442089	0.437341	0.00253408	0.657283	0.463244	0.194039	2.00425e-11	0.691945	0.590996	0.100949	0.00102214	-0.535829	-0.296415	-0.265057
cg20985067	-851	p1@PON1,p1@PON3	chr7:95025661..95025712,-	PON1	protein coding		0.788973	0.441637	0.347336	0.0386894	0.544864	0.486437	0.0584267	0.0186668	0.567169	0.627727	-0.0605584	0.0260391	-0.532961	-0.285502	-0.324426
cg22784187	-403	p1@PON1,p1@PON3	chr7:95025661..95025712,-	PON1	protein coding		0.776198	0.475007	0.301191	0.028578	0.608455	0.48994	0.118515	1.36973e-10	0.621089	0.525311	0.0957779	3.22279e-06	-0.329947	-0.206731	-0.135594
cg20985067	-851	p2@PON3,p5@PON1	chr7:95025713..95025722,-	PON1	protein coding		0.788973	0.441637	0.347336	0.0386894	0.544864	0.486437	0.0584267	0.0186668	0.567169	0.627727	-0.0605584	0.0260391	-0.532961	-0.285502	-0.324426
cg22784187	-403	p2@PON3,p5@PON1	chr7:95025713..95025722,-	PON1	protein coding		0.776198	0.475007	0.301191	0.028578	0.608455	0.48994	0.118515	1.36973e-10	0.621089	0.525311	0.0957779	3.22279e-06	-0.329947	-0.206731	-0.135594
cg03605686	-616	p@chr7:95025802..95025818,+	chr7:95025802..95025818,+		lncrna		0.87943	0.442089	0.437341	0.00253408	0.657283	0.463244	0.194039	2.00425e-11	0.691945	0.590996	0.100949	0.00102214	NA	NA	NA
cg22784187	-403	p@chr7:95025802..95025818,+	chr7:95025802..95025818,+		lncrna		0.776198	0.475007	0.301191	0.028578	0.608455	0.48994	0.118515	1.36973e-10	0.621089	0.525311	0.0957779	3.22279e-06	NA	NA	NA
cg26680675	-733	p1@AZGP1	chr7:99573677..99573697,-	AZGP1	protein coding		0.799463	0.584154	0.21531	0.0432133	0.800735	0.583769	0.216966	2.68154e-15	0.798207	0.536665	0.261541	5.63733e-22	-0.464472	-0.0186793	0.200135
cg09305680	-703	p1@UTP23	chr8:117778736..117778808,+	UTP23	protein coding		0.44943	0.173811	0.275619	4.78534e-07	0.407076	0.27583	0.131246	2.30494e-12	0.395332	0.262171	0.133161	7.83189e-14	0.15728	-0.381551	-0.322891
cg09502207	-1403	p1@TMEM71	chr8:133772798..133772840,-	TMEM71	protein coding		0.840787	0.343623	0.497163	1.7365e-05	0.819518	0.634654	0.184864	6.52982e-09	0.837943	0.689009	0.148934	3.01246e-09	0.619286	0.587966	0.451195
cg09502207	-1403	p2@TMEM71	chr8:133772870..133772881,-	TMEM71	protein coding		0.840787	0.343623	0.497163	1.7365e-05	0.819518	0.634654	0.184864	6.52982e-09	0.837943	0.689009	0.148934	3.01246e-09	0.619286	0.587966	0.451195
cg09502207	-1403	p4@TMEM71	chr8:133772882..133772900,-	TMEM71	protein coding		0.840787	0.343623	0.497163	1.7365e-05	0.819518	0.634654	0.184864	6.52982e-09	0.837943	0.689009	0.148934	3.01246e-09	0.619286	0.587966	0.451195
cg09502207	-1403	p5@TMEM71	chr8:133772908..133772919,-	TMEM71	protein coding		0.840787	0.343623	0.497163	1.7365e-05	0.819518	0.634654	0.184864	6.52982e-09	0.837943	0.689009	0.148934	3.01246e-09	0.619286	0.587966	0.451195
cg09147372	-557	p1@MAPK15	chr8:144798487..144798561,+	MAPK15	protein coding		0.82364	0.495237	0.328403	0.00568332	0.925449	0.787003	0.138446	1.01849e-07	0.89996	0.545482	0.354477	8.04235e-39	0.210311	0.076685	0.0903952
cg16334849	-187	p1@ENST00000519451,p1@ENST00000524132	chr8:36636676..36636688,-	RP11-962G15.1	linc	LTR/ERV1	0.936417	0.543171	0.393246	0.011223	0.992452	0.859111	0.13334	3.50246e-05	0.99139	0.772594	0.218796	3.80851e-11	-0.538296	NA	NA
cg25612480	-528	p1@UBE2V2	chr8:48920969..48921007,+	UBE2V2	protein coding	Simple repeat	0.590262	0.285613	0.304649	0.00614182	0.633834	0.393348	0.240487	1.73224e-25	0.654721	0.363138	0.291584	6.30971e-45	-0.152235	-0.369327	-0.23766
cg07896832	-745	p1@CSPP1	chr8:67976593..67976645,+	CSPP1	protein coding		0.859582	0.26333	0.596251	8.12702e-06	0.77069	0.499097	0.271593	1.36989e-13	0.75046	0.400144	0.350316	3.72993e-37	-0.030976	-0.254268	-0.250393
cg21320567	-739	p1@CSPP1	chr8:67976593..67976645,+	CSPP1	protein coding		0.838703	0.319029	0.519675	5.74506e-05	0.732641	0.508222	0.224419	4.08763e-11	0.731117	0.418012	0.313106	1.40553e-34	0.0152881	-0.258236	-0.259244
cg27247252	-724	p1@CSPP1	chr8:67976593..67976645,+	CSPP1	protein coding		0.800802	0.375096	0.425705	0.00409288	0.79792	0.534199	0.26372	1.63036e-11	0.8068	0.455804	0.350997	6.92412e-34	0.00236857	-0.262055	-0.256785
cg07896832	-745	p2@CSPP1	chr8:67976646..67976676,+	CSPP1	protein coding		0.859582	0.26333	0.596251	8.12702e-06	0.77069	0.499097	0.271593	1.36989e-13	0.75046	0.400144	0.350316	3.72993e-37	-0.030976	-0.254268	-0.250393
cg21320567	-739	p2@CSPP1	chr8:67976646..67976676,+	CSPP1	protein coding		0.838703	0.319029	0.519675	5.74506e-05	0.732641	0.508222	0.224419	4.08763e-11	0.731117	0.418012	0.313106	1.40553e-34	0.0152881	-0.258236	-0.259244
cg27247252	-724	p2@CSPP1	chr8:67976646..67976676,+	CSPP1	protein coding		0.800802	0.375096	0.425705	0.00409288	0.79792	0.534199	0.26372	1.63036e-11	0.8068	0.455804	0.350997	6.92412e-34	0.00236857	-0.262055	-0.256785
cg23732024	180	p1@LY96	chr8:74903580..74903661,+	LY96	protein coding		0.888407	0.446464	0.441943	0.00716816	0.740165	0.318469	0.421696	2.77812e-29	0.68851	0.475073	0.213438	4.18908e-09	-0.776819	-0.166824	-0.406717
cg22792785	-519	p1@LRRCC1	chr8:86019422..86019487,+	LRRCC1	protein coding		0.606475	0.249454	0.357021	0.000314779	0.18755	0.113872	0.0736787	1.83034e-07	0.145235	0.0988237	0.0464113	2.50903e-06	0.222308	-0.0919896	-0.0717994
cg22792785	-519	p2@LRRCC1	chr8:86019489..86019510,+	LRRCC1	protein coding		0.606475	0.249454	0.357021	0.000314779	0.18755	0.113872	0.0736787	1.83034e-07	0.145235	0.0988237	0.0464113	2.50903e-06	0.222308	-0.0919896	-0.0717994
cg05806645	126	p1@ENST00000518496	chr8:9009202..9009250,+	RP11-10A14.4	protein coding		0.440727	0.165573	0.275155	0.00502567	0.247277	0.18699	0.0602871	0.0123913	0.18206	0.150936	0.0311238	0.0672153	NA	NA	NA
cg14595462	261	p1@PAEP	chr9:138453595..138453608,+	PAEP	protein coding		0.726453	0.459504	0.266949	0.0349209	0.756251	0.563719	0.192532	4.70423e-22	0.740208	0.585334	0.154874	2.82376e-15	-0.520576	-0.271176	0.147623
cg23395310	-792	p1@SNHG7	chr9:139622626..139622643,-	SNHG7	antisense		0.580835	0.291142	0.289693	0.00845173	0.455194	0.347615	0.107579	6.40173e-09	0.431625	0.294284	0.137341	6.19949e-23	0.062352	-0.0987814	-0.111286
cg14223579	72	p@chr9:88358692..88358707,+	chr9:88358692..88358707,+		pseudogene		0.562225	0.254415	0.30781	0.0135869	0.802896	0.558588	0.244308	1.29989e-15	0.772434	0.56912	0.203315	2.69945e-12	NA	NA	NA
cg13647892	295	p3@uc004aus.1	chr9:97316879..97316889,+	PCAT7	antisense	REP522	0.832682	0.160509	0.672173	1.787e-14	0.885362	0.592381	0.292981	5.25413e-22	0.854153	0.497796	0.356357	2.65742e-32	-0.527392	-0.330002	-0.470901
cg13647892	295	p@chr9:97317164..97317174,-	chr9:97317164..97317174,-		lncrna	REP522	0.832682	0.160509	0.672173	1.787e-14	0.885362	0.592381	0.292981	5.25413e-22	0.854153	0.497796	0.356357	2.65742e-32	NA	NA	NA
cg13647892	295	p1@uc004aus.1	chr9:97317348..97317379,+	PCAT7	antisense	REP522	0.832682	0.160509	0.672173	1.787e-14	0.885362	0.592381	0.292981	5.25413e-22	0.854153	0.497796	0.356357	2.65742e-32	-0.527392	-0.330002	-0.470901
cg02992777	-1280	p1@BEX1	chrX:102319092..102319107,-	BEX1	protein coding		0.55883	0.288274	0.270556	0.0347677	0.833676	0.571992	0.261684	4.13963e-18	0.839942	0.507581	0.332361	1.0325e-35	0.364508	0.169626	0.00586695
cg19928247	143	p4@TCEAL1	chrX:102883620..102883681,+	TCEAL1	protein coding		0.327067	0.125561	0.201506	0.0134975	0.258097	0.248982	0.00911546	0.816131	0.179051	0.133521	0.0455306	0.115809	-0.0571842	-0.0205511	0.0330358
cg19928247	143	p6@TCEAL1	chrX:102883842..102883867,+	TCEAL1	protein coding		0.327067	0.125561	0.201506	0.0134975	0.258097	0.248982	0.00911546	0.816131	0.179051	0.133521	0.0455306	0.115809	-0.0571842	-0.0205511	0.0330358
cg19928247	143	p1@TCEAL1	chrX:102883887..102883909,+	TCEAL1	protein coding		0.327067	0.125561	0.201506	0.0134975	0.258097	0.248982	0.00911546	0.816131	0.179051	0.133521	0.0455306	0.115809	-0.0571842	-0.0205511	0.0330358
cg19928247	143	p2@TCEAL1	chrX:102884372..102884419,+	TCEAL1	protein coding		0.327067	0.125561	0.201506	0.0134975	0.258097	0.248982	0.00911546	0.816131	0.179051	0.133521	0.0455306	0.115809	-0.0571842	-0.0205511	0.0330358
cg19928247	143	p5@TCEAL1	chrX:102884424..102884441,+	TCEAL1	protein coding		0.327067	0.125561	0.201506	0.0134975	0.258097	0.248982	0.00911546	0.816131	0.179051	0.133521	0.0455306	0.115809	-0.0571842	-0.0205511	0.0330358
cg19928247	143	p3@TCEAL1	chrX:102884623..102884687,+	TCEAL1	protein coding gene body		0.327067	0.125561	0.201506	0.0134975	0.258097	0.248982	0.00911546	0.816131	0.179051	0.133521	0.0455306	0.115809	-0.0571842	-0.0205511	0.0330358
cg01868753	154	p1@RBM41	chrX:106362013..106362066,-	RBM41	protein coding		0.335808	0.126166	0.209643	0.000532413	0.196308	0.197326	-0.00101712	0.974371	0.144983	0.104697	0.0402858	0.0617231	-0.284444	-0.0199853	0.0489935
cg00488364	-1155	p1@IL13RA2	chrX:114252132..114252187,-	IL13RA2	protein coding		0.827322	0.52588	0.301442	0.0302183	0.857084	0.69342	0.163664	8.23106e-07	0.866973	0.792341	0.0746317	0.00359043	0.103496	0.152285	-0.0205373
cg17155263	89	p1@CXorf61	chrX:115594126..115594143,-	CXorf61	protein coding		0.789358	0.353768	0.43559	0.00438893	0.855901	0.685888	0.170013	1.11334e-07	0.880145	0.749144	0.131	3.08388e-06	-0.651192	-0.718131	-0.684181
cg17155263	89	p2@CXorf61	chrX:115594160..115594172,-	CXorf61	protein coding		0.789358	0.353768	0.43559	0.00438893	0.855901	0.685888	0.170013	1.11334e-07	0.880145	0.749144	0.131	3.08388e-06	-0.651192	-0.718131	-0.684181
cg17155263	89	p3@CXorf61	chrX:115594195..115594200,-	CXorf61	protein coding		0.789358	0.353768	0.43559	0.00438893	0.855901	0.685888	0.170013	1.11334e-07	0.880145	0.749144	0.131	3.08388e-06	-0.651192	-0.718131	-0.684181
cg02510708	-182	p1@STAG2	chrX:123095546..123095644,+	STAG2	protein coding	Simple repeat	0.297326	0.0961423	0.201184	0.0160971	0.260956	0.277171	-0.0162149	0.738166	0.168674	0.139774	0.0289005	0.418903	-0.213141	-0.141362	-0.136855
cg02510708	-182	p10@STAG2	chrX:123095860..123095888,+	STAG2	protein coding		0.297326	0.0961423	0.201184	0.0160971	0.260956	0.277171	-0.0162149	0.738166	0.168674	0.139774	0.0289005	0.418903	-0.213141	-0.141362	-0.136855
cg02510708	-182	p3@STAG2	chrX:123095890..123095935,+	STAG2	protein coding		0.297326	0.0961423	0.201184	0.0160971	0.260956	0.277171	-0.0162149	0.738166	0.168674	0.139774	0.0289005	0.418903	-0.213141	-0.141362	-0.136855
cg05052243	-321	p1@CT45A5	chrX:134975521..134975551,-		protein coding	LTR/ERVL	0.613135	0.30682	0.306315	0.00235742	0.723006	0.519878	0.203128	2.88487e-14	0.728472	0.479578	0.248895	4.33356e-23	NA	NA	NA
cg05052243	-321	p1@SAGE1	chrX:134975858..134975877,+	SAGE1	protein coding	LTR/ERVL	0.613135	0.30682	0.306315	0.00235742	0.723006	0.519878	0.203128	2.88487e-14	0.728472	0.479578	0.248895	4.33356e-23	-0.163909	-0.0185477	-0.2462
cg24352688	-1178	p3@OFD1	chrX:13752894..13752916,+	OFD1	protein coding		0.750928	0.439326	0.311602	0.0389892	0.699912	0.636892	0.0630197	0.0191281	0.667078	0.429852	0.237226	6.64934e-20	-0.324003	0.0159942	-0.121487
cg09929941	-29	p1@MAGEC2	chrX:141293047..141293082,-	MAGEC2	protein coding		0.772932	0.496772	0.276159	0.04507	0.810186	0.68883	0.121355	2.32526e-07	0.819895	0.643201	0.176694	4.13278e-18	-0.629519	-0.628264	-0.57392
cg10739728	-53	p1@MAGEC2	chrX:141293047..141293082,-	MAGEC2	protein coding		0.86473	0.463838	0.400892	0.0343817	0.968745	0.804318	0.164428	3.78411e-08	0.977516	0.786706	0.19081	2.16839e-13	-0.655823	-0.636958	-0.657109
cg20333412	-48	p1@MAGEC2	chrX:141293047..141293082,-	MAGEC2	protein coding		0.853212	0.544843	0.308369	0.0496715	0.927459	0.762595	0.164864	1.20402e-08	0.945666	0.733806	0.21186	5.00342e-18	-0.685447	-0.657979	-0.678009
cg26465522	-66	p1@MAGEC2	chrX:141293047..141293082,-	MAGEC2	protein coding		0.753023	0.355186	0.397838	0.0290998	0.973589	0.761224	0.212365	7.37646e-10	0.971653	0.74975	0.221904	6.08521e-14	-0.631022	-0.608012	-0.620277
cg08448931	-332	p2@MAGEA4	chrX:151080929..151080974,+	MAGEA4	protein coding		0.798043	0.418026	0.380017	0.00294141	0.822881	0.582884	0.239997	1.80196e-12	0.833646	0.61883	0.214816	8.74154e-13	-0.256061	-0.0612399	-0.13413
cg08448931	-332	p1@MAGEA4	chrX:151081351..151081390,+	MAGEA4	protein coding		0.798043	0.418026	0.380017	0.00294141	0.822881	0.582884	0.239997	1.80196e-12	0.833646	0.61883	0.214816	8.74154e-13	-0.256061	-0.0612399	-0.13413
cg05031352	-84	p2@MAGEA1	chrX:152486087..152486103,-	MAGEA1	protein coding		0.909373	0.45613	0.453243	0.010893	0.97293	0.814984	0.157946	3.05561e-05	0.966248	0.627844	0.338404	2.2402e-22	-0.730281	-0.562691	-0.508766
cg10066681	-77	p2@MAGEA1	chrX:152486087..152486103,-	MAGEA1	protein coding		0.92753	0.496669	0.430861	0.0186218	0.981054	0.832571	0.148483	9.51651e-05	0.979318	0.659206	0.320112	1.4636e-20	-0.751219	-0.586131	-0.569197
cg13494652	-372	p2@MAGEA1	chrX:152486087..152486103,-	MAGEA1	protein coding		0.579332	0.365418	0.213914	0.0402912	0.697016	0.54789	0.149125	3.91759e-09	0.676445	0.453179	0.223266	2.17774e-23	-0.222678	-0.425188	-0.108277
cg23776892	157	p2@MAGEA1	chrX:152486087..152486103,-	MAGEA1	protein coding		0.668497	0.418664	0.249832	0.0346044	0.789912	0.662968	0.126944	1.32756e-07	0.79585	0.600132	0.195718	6.05398e-17	-0.664956	-0.478087	-0.561483
cg05031352	-84	p1@MAGEA1	chrX:152486108..152486123,-	MAGEA1	protein coding		0.909373	0.45613	0.453243	0.010893	0.97293	0.814984	0.157946	3.05561e-05	0.966248	0.627844	0.338404	2.2402e-22	-0.730281	-0.562691	-0.508766
cg10066681	-77	p1@MAGEA1	chrX:152486108..152486123,-	MAGEA1	protein coding		0.92753	0.496669	0.430861	0.0186218	0.981054	0.832571	0.148483	9.51651e-05	0.979318	0.659206	0.320112	1.4636e-20	-0.751219	-0.586131	-0.569197
cg13494652	-372	p1@MAGEA1	chrX:152486108..152486123,-	MAGEA1	protein coding		0.579332	0.365418	0.213914	0.0402912	0.697016	0.54789	0.149125	3.91759e-09	0.676445	0.453179	0.223266	2.17774e-23	-0.222678	-0.425188	-0.108277
cg23776892	157	p1@MAGEA1	chrX:152486108..152486123,-	MAGEA1	protein coding		0.668497	0.418664	0.249832	0.0346044	0.789912	0.662968	0.126944	1.32756e-07	0.79585	0.600132	0.195718	6.05398e-17	-0.664956	-0.478087	-0.561483
cg05031352	-84	p3@MAGEA1	chrX:152486124..152486143,-	MAGEA1	protein coding		0.909373	0.45613	0.453243	0.010893	0.97293	0.814984	0.157946	3.05561e-05	0.966248	0.627844	0.338404	2.2402e-22	-0.730281	-0.562691	-0.508766
cg10066681	-77	p3@MAGEA1	chrX:152486124..152486143,-	MAGEA1	protein coding		0.92753	0.496669	0.430861	0.0186218	0.981054	0.832571	0.148483	9.51651e-05	0.979318	0.659206	0.320112	1.4636e-20	-0.751219	-0.586131	-0.569197
cg13494652	-372	p3@MAGEA1	chrX:152486124..152486143,-	MAGEA1	protein coding		0.579332	0.365418	0.213914	0.0402912	0.697016	0.54789	0.149125	3.91759e-09	0.676445	0.453179	0.223266	2.17774e-23	-0.222678	-0.425188	-0.108277
cg23776892	157	p3@MAGEA1	chrX:152486124..152486143,-	MAGEA1	protein coding		0.668497	0.418664	0.249832	0.0346044	0.789912	0.662968	0.126944	1.32756e-07	0.79585	0.600132	0.195718	6.05398e-17	-0.664956	-0.478087	-0.561483
cg17639056	-68	p1@SLC9A7	chrX:46618519..46618622,-	SLC9A7	protein coding		0.295822	0.0796375	0.216185	0.00700264	0.231665	0.286347	-0.0546816	0.276922	0.166153	0.139067	0.0270857	0.479317	-0.0746562	-0.0133851	-0.0143614
cg10860619	-191	p4@PHF16	chrX:46772037..46772051,+	PHF16	protein coding		0.304916	0.0963526	0.208564	0.0144771	0.255567	0.291191	-0.0356243	0.476556	0.177165	0.152269	0.0248958	0.526243	-0.294165	-0.0812173	-0.141884
cg16126759	-288	p1@RRAGB	chrX:55744166..55744222,+	RRAGB	protein coding		0.376811	0.168278	0.208534	0.0338185	0.234593	0.238093	-0.00349966	0.922791	0.167303	0.131092	0.036211	0.176385	-0.205574	-0.00390889	0.0275002
cg18931873	-1489	p1@ENST00000396021	chrX:68003226..68003229,+	SERBP1P1	pseudogene	LINE/L1	0.638398	0.384658	0.25374	0.0310408	0.878089	0.731919	0.14617	1.15938e-07	0.876787	0.679766	0.197022	2.84366e-15	NA	-0.0557747	-0.0518762
cg05109619	-148	p1@KIF4A	chrX:69509927..69509970,+	KIF4A	protein coding		0.282677	0.0742077	0.208469	0.0120754	0.243839	0.267585	-0.0237466	0.613433	0.165132	0.130374	0.0347578	0.314906	-0.327017	-0.227772	-0.116077
cg00816548	-162	p1@COX7B	chrX:77154953..77155012,+	COX7B	protein coding		0.334997	0.120211	0.214785	0.000124341	0.269453	0.242981	0.0264723	0.43086	0.204508	0.154531	0.0499773	0.0359802	-0.216894	-0.0727625	-0.0398918
cg10646076	-109	p1@COX7B	chrX:77154953..77155012,+	COX7B	protein coding		0.353947	0.149397	0.204549	0.00338526	0.295598	0.273611	0.0219877	0.562178	0.223692	0.170273	0.0534187	0.0575706	-0.338065	-0.0617412	-0.0871716
cg12981362	-42	p1@COX7B	chrX:77154953..77155012,+	COX7B	protein coding		0.40593	0.200315	0.205615	0.015312	0.29131	0.286526	0.00478396	0.912097	0.209152	0.163324	0.0458272	0.138311	-0.285798	-0.0805458	-0.0453998
cg19584075	44	p1@COX7B	chrX:77154953..77155012,+	COX7B	protein coding		0.385229	0.168153	0.217076	0.0128014	0.294095	0.288238	0.00585702	0.901502	0.21272	0.155356	0.0573643	0.104792	-0.184349	-0.0500284	0.00922031
cg05563347	-1060	p1@APOOL	chrX:84258868..84258915,+	APOOL	protein coding		0.89409	0.497977	0.396113	0.012918	0.863893	0.730745	0.133148	1.54062e-05	0.883492	0.746214	0.137278	7.35131e-07	-0.120182	-0.168818	-0.0972202
cg25153266	-440	p1@APOOL	chrX:84258868..84258915,+	APOOL	protein coding		0.387055	0.160074	0.226981	0.00241105	0.340502	0.287208	0.0532941	0.191387	0.262155	0.169789	0.092366	0.00210949	-0.5269	-0.157244	0.00471284

## Sheet: S5
Supplementary Table S5: Epi-markers in NSCLC.
		Differential methylation (DM)		FANTOM5 Differential expression (DE)										TCGA
							DE promoter with highest expression							Spearman Rho < -0.3		TCGA DE		TCGA ON/OFF
Gene symbol	category	# DM probes	DM Probe IDs	# UP promoters	UP promoters	Up promoter location	Promoter	Promoter location	logFC	logCPM	FDR	gene annotation	REPEAT	LUAD	LUSC	LUAD	LUSC	LUAD	LUSC
CEP55	cancer testis antigen	1	cg25314624	1	p2@CEP55	chr10:95256421..95256437,+	p2@CEP55	chr10:95256421..95256437,+	2.53	2.21	0.00238	protein coding		yes	yes	UP	UP
CT83	cancer testis antigen	3	cg17155263, cg17155263, cg17155263	3	p1@orf61 p2@orf61 p3@orf61	chrX:115594126..115594143,- chrX:115594160..115594172,- chrX:115594195..115594200,-	p1@orf61	chrX:115594126..115594143,-	8.02	2.66	3e-05	protein coding		yes	yes	UP	UP	ON	ON
MAGEA1	cancer testis antigen	9	cg05031352, cg10066681, cg23776892, cg05031352, cg10066681, cg23776892, cg05031352, cg10066681, cg23776892	9	p1@MAGEA1 p1@MAGEA1 p1@MAGEA1 p2@MAGEA1 p2@MAGEA1 p2@MAGEA1 p3@MAGEA1 p3@MAGEA1 p3@MAGEA1	chrX:152486108..152486123,- chrX:152486108..152486123,- chrX:152486108..152486123,- chrX:152486087..152486103,- chrX:152486087..152486103,- chrX:152486087..152486103,- chrX:152486124..152486143,- chrX:152486124..152486143,- chrX:152486124..152486143,-	p1@MAGEA1	chrX:152486108..152486123,-	6.02	1.09	0.0378	protein coding		yes	yes	UP	UP	ON	ON
MAGEC2	cancer testis antigen	2	cg10739728, cg26465522	2	p1@MAGEC2 p1@MAGEC2	chrX:141293047..141293082,- chrX:141293047..141293082,-	p1@MAGEC2	chrX:141293047..141293082,-	4.97	0.47	0.04711	protein coding		yes	yes	UP	UP	ON	ON
PRAME	cancer testis antigen	9	cg22871485, cg27303185, cg27303185, cg22871485, cg27303185, cg22871485, cg27303185, cg22871485, cg27303185	9	p1@PRAME p1@PRAME p2@PRAME p3@PRAME p3@PRAME p4@PRAME p4@PRAME p5@PRAME p5@PRAME	chr22:22901636..22901715,- chr22:22901636..22901715,- chr22:22900001..22900057,- chr22:22901414..22901437,- chr22:22901414..22901437,- chr22:22901477..22901499,- chr22:22901477..22901499,- chr22:22901442..22901461,- chr22:22901442..22901461,-	p1@PRAME	chr22:22901636..22901715,-	8.98	3.51	0	protein coding		yes	yes	UP	UP	ON	ON
ADPRHL1	protein coding	4	cg04398180, cg05163330, cg10624914, cg22478679	4	p2@ADPRHL1 p2@ADPRHL1 p2@ADPRHL1 p2@ADPRHL1	chr13:114103443..114103479,- chr13:114103443..114103479,- chr13:114103443..114103479,- chr13:114103443..114103479,-	p2@ADPRHL1	chr13:114103443..114103479,-	4.12	0.89	2e-05	protein coding		yes	yes	UP
AIM2	protein coding	2	cg17515347, cg17515347	2	p1@AIM2 p2@AIM2	chr1:159046532..159046595,- chr1:159046617..159046630,-	p1@AIM2	chr1:159046532..159046595,-	6.94	1.77	0.0009	protein coding		yes	yes	UP	UP		ON
ARL14	protein coding	2	cg24147596, cg24147596	2	p1@ARL14 p2@ARL14	chr3:160394940..160394954,+ chr3:160394961..160394996,+	p1@ARL14	chr3:160394940..160394954,+	3.96	1.88	0.00133	protein coding		yes	yes	UP	UP
IGF2BP3	protein coding	3	cg08939418, cg08939418, cg08939418	3	p1@IGF2BP3 p2@IGF2BP3 p7@IGF2BP3	chr7:23509977..23510032,- chr7:23510088..23510118,- chr7:23510430..23510452,-	p1@IGF2BP3	chr7:23509977..23510032,-	1.85	5.01	0.02008	protein coding	Low complexity	yes	yes	UP	UP
KAZALD1	protein coding	6	cg13269555, cg15302379, cg26605164, cg13269555, cg15302379, cg26605164	6	p1@KAZALD1 p1@KAZALD1 p1@KAZALD1 p4@KAZALD1 p4@KAZALD1 p4@KAZALD1	chr10:102821731..102821752,+ chr10:102821731..102821752,+ chr10:102821731..102821752,+ chr10:102821551..102821589,+ chr10:102821551..102821589,+ chr10:102821551..102821589,+	p1@KAZALD1	chr10:102821731..102821752,+	4.74	1.16	9e-05	protein coding		yes	yes	UP
LRP1B	protein coding	9	cg00603435, cg00821600, cg02488702, cg00603435, cg00821600, cg02488702, cg00603435, cg00821600, cg02488702	9	p3@LRP1B p3@LRP1B p3@LRP1B p2@LRP1B p2@LRP1B p2@LRP1B p1@LRP1B p1@LRP1B p1@LRP1B	chr2:142888573..142888591,- chr2:142888573..142888591,- chr2:142888573..142888591,- chr2:142888550..142888567,- chr2:142888550..142888567,- chr2:142888550..142888567,- chr2:142888525..142888547,- chr2:142888525..142888547,- chr2:142888525..142888547,-	p3@LRP1B	chr2:142888573..142888591,-	4.87	0.4	0.00495	protein coding			yes	UP	UP
MKRN3	protein coding	1	cg20769842	1	p1@MKRN3	chr15:23810812..23810828,+	p1@MKRN3	chr15:23810812..23810828,+	4.36	1.72	0.0015	protein coding			yes	UP	UP
MYEOV	protein coding	3	cg01638792, cg01638792, cg01638792	3	p1@MYEOV p3@MYEOV p5@MYEOV	chr11:69061594..69061635,+ chr11:69061636..69061648,+ chr11:69061580..69061585,+	p1@MYEOV	chr11:69061594..69061635,+	5.78	5.51	0	protein coding		yes	yes	UP	UP		ON
PLD1	protein coding	1	cg17024257	1	p1@PLD1	chr3:171528227..171528298,-	p1@PLD1	chr3:171528227..171528298,-	1.93	4.02	0.00639	protein coding	Simple repeat	yes			UP
PON1	protein coding	2	cg20985067, cg20985067	2	p1@PON1,p1@PON3 p2@PON3,p5@PON1	chr7:95025661..95025712,- chr7:95025713..95025722,-	p1@PON1,p1@PON3	chr7:95025661..95025712,-	3.73	3.05	0.00099	protein coding			yes	UP			OFF
RP11-564D11.3	pseudogene	1	cg17837712	1	p1@ENST00000416234	chr10:124639222..124639278,+	p1@ENST00000416234	chr10:124639222..124639278,+	1.35	1.05	0.03208	pseudogene		yes	yes	UP	UP	ON	ON
LINC00857	linc	3	cg11647108, cg11647108, cg11647108	3	p1@LOC439990 p2@LOC439990 p3@LOC439990	chr10:81967174..81967212,+ chr10:81967152..81967173,+ chr10:81967456..81967471,+	p1@LOC439990	chr10:81967174..81967212,+	1.66	1.92	0.0054	linc		yes	yes	UP		ON	ON
RP11-371I1.2	linc at LTR/ERV1	2	cg16662846, cg16662846	2	p1@ENST00000400946 p1@LOC339535	chr1:238649319..238649345,- chr1:238649277..238649316,-	p1@ENST00000400946	chr1:238649319..238649345,-	3.86	1.6	0.00334	linc	LTR/ERV1	yes	yes	UP	UP	ON	ON
GS1-179L18.1	linc at LTR/ERVL	3	cg00347856, cg08311085, cg11129772	3	p1@FLJ45974 p1@FLJ45974 p1@FLJ45974	chr7:53879623..53879635,- chr7:53879623..53879635,- chr7:53879623..53879635,-	p1@FLJ45974	chr7:53879623..53879635,-	5.99	1.82	0.00213	linc	LTR/ERVL	yes	yes	UP	UP	ON	ON
PCAT7	REP522 (antisense)	2	cg13647892, cg13647892	2	p1@uc004aus.1 p3@uc004aus.1	chr9:97317348..97317379,+ chr9:97316879..97316889,+	p1@uc004aus.1	chr9:97317348..97317379,+	5.39	1.17	0	antisense	REP522	yes	yes	UP	UP	ON	ON
RP1-90G24.10	REP522 (antisense)	2	cg25125450, cg26494441	2	p1@ENST00000434942 p1@ENST00000434942	chr22:32601104..32601159,+ chr22:32601104..32601159,+	p1@ENST00000434942	chr22:32601104..32601159,+	4.43	0.98	2e-05	antisense	REP522	yes	yes			ON	ON
AL022344.4	REP522 (linc)	2	cg02780400, cg11519260	2	p1@ENST00000411439 p1@ENST00000411439	chr10:43187153..43187192,- chr10:43187153..43187192,-	p1@ENST00000411439	chr10:43187153..43187192,-	4.54	0.13	0.03337	linc	REP522	yes		UP	UP	ON	ON

## Sheet: S6
Supplementary Table S6: Extended information for Table 2.
					Correleation gene expression and methylaion		Differential expression				DNA demethylation treatment	Survival analysis						Threshold = max expression in normal TCGA samples						Threshold = max expression in normal TCGA samples + 1 standard deviation						Threshold = mean expression in normal TCGA samples + 3 standard deviations
					Spearman Rho < -0.3		TCGA DE		TCGA ON/OFF			TCGA LUAD			TCGA LUSC			Activation threshold (RPKM)		Frequency (%) Normal		Frequency (%) Cancer		Activation threshold (RPKM)		Frequency (%) Normal		Frequency (%) Cancer		Activation threshold (RPKM)		frequency (%) Normal		Frequency (%) Cancer
	Gene symbol	category	# DM probes	# UP promoters	LUAD	LUSC	LUAD	LUSC	LUAD	LUSC		prognosis	HR (95% CI)	P value	prognosis	HR (95% CI)	P value	LUAD	LUSC	LUAD	LUSC	LUAD	LUSC	LUAD	LUSC	LUAD	LUSC	LUAD	LUSC	LUAD	LUSC	LUAD	LUSC	LUAD	LUSC
1	MYEOV	protein coding	3	3	yes	yes	UP	UP		ON	UP	poor	1.42 (1.06 - 1.91)	0.02	poor	1.41 (1.08 - 1.86)	0.01	21.71	34.87	0	0	0.627	0.495	39.21	65.42	0	0	0.56	0.37	24.1	28.22	0	0.02	0.61	0.54
2	ADPRHL1	protein coding	4	4	yes	yes	UP											139.36	111.33	0	0	0.232	0.164	197.4	158.42	0	0	0.13	0.08	121.77	121.53	0.02	0	0.3	0.14
3	ARL14	protein coding	2	2	yes	yes	UP	UP			UP							13.8	11.79	0	0	0.301	0.391	29.03	24.39	0	0	0.21	0.27	21.36	21.54	0	0	0.25	0.3
4	KAZALD1	protein coding	6	6	yes	yes	UP				UP							191.16	103.83	0	0	0.219	0.184	277.71	151.69	0	0	0.09	0.1	166.62	173.36	0.02	0	0.27	0.07
5	PLD1	protein coding	1	1	yes			UP			UP							480.57	630.85	0	0	0.236	0.764	618.17	866.45	0	0	0.13	0.61	657.66	873.97	0	0	0.12	0.6
6	AIM2	protein coding	2	2	yes	yes	UP	UP		ON								155.95	382.57	0	0	0.336	0.164	316.83	891.01	0	0	0.2	0.04	166.07	323.03	0	0.02	0.32	0.19
7	IGF2BP3	protein coding	3	3	yes	yes	UP	UP				poor	1.50 (1.12 - 2.03)	0.01				291.98	143.62	0	0	0.455	0.838	537.06	220.6	0	0	0.31	0.81	197.34	109	0.02	0.02	0.51	0.87
8	LRP1B	protein coding	9	9		yes	UP	UP										28.72	17.64	0	0	0.076	0.371	59.72	34	0	0	0.04	0.27	27.57	20.38	0.02	0	0.08	0.36
9	MKRN3	protein coding	1	1		yes	UP	UP										17.1	12.93	0	0	0.232	0.663	38.61	28.83	0	0	0.16	0.62	27.24	24.42	0	0	0.19	0.63
10	PON1	protein coding	2	2		yes	UP			OFF								27.44	34.92	0	0	0.27	0.026	53.7	72.19	0	0	0.15	0.01	45.2	50.65	0	0	0.19	0.01
11	MAGEA1	cancer testis antigen	9	9	yes	yes	UP	UP	ON	ON	UP							8.25	11.87	0	0	0.176	0.445	13.57	19.87	0	0	0.16	0.4	3.6	4.42	0.05	0.02	0.21	0.53
12	MAGEC2	cancer testis antigen	2	2	yes	yes	UP	UP	ON	ON	UP							7.7	1.86	0	0	0.209	0.363	11.82	2.58	0	0	0.18	0.33	2.7	1.15	0.02	0.02	0.25	0.4
13	PRAME	cancer testis antigen	9	9	yes	yes	UP	UP	ON	ON	UP							42.84	28.31	0	0	0.52	0.864	101.35	65.01	0	0	0.45	0.85	23.48	35.06	0.03	0	0.55	0.86
14	CEP55	cancer testis antigen	1	1	yes	yes	UP	UP				poor	1.35 (1.01 - 1.82)	0.04				155.38	250.45	0	0	0.779	0.978	276.14	558.93	0	0	0.62	0.78	222.77	438.66	0	0	0.68	0.89
15	CT83	cancer testis antigen	3	3	yes	yes	UP	UP	ON	ON		poor	1.42 (1.06 - 1.91)	0.02				7	4.76	0	0	0.49	0.321	11.4	7.12	0	0	0.46	0.31	3.98	2.52	0.02	0.02	0.51	0.33
16	RP11-564D11.3	pseudogene	1	1	yes	yes	UP	UP	ON	ON								0.17	0.68	0	0	0.859	0.589	0.22	0.82	0	0	0.82	0.49	0.18	0.38	0	0.02	0.86	0.77
17	LINC00857	linc	3	3	yes	yes	UP		ON	ON	UP	poor	1.37 (1.01 - 1.83)	0.04				1.14	1.85	0	0	0.742	0.138	1.43	2.3	0	0	0.61	0.09	1.02	1.2	0.02	0.02	0.78	0.25
18	PCAT7	antisense from REP522 promoter	2	2	yes	yes	UP	UP	ON	ON	UP							0.36	0.25	0	0	0.436	0.858	0.47	0.31	0	0	0.35	0.83	0.38	0.25	0	0	0.41	0.86
19	RP1-90G24.10	antisense from REP522 promoter	2	2	yes	yes			ON	ON								0.33	0.3	0	0	0.158	0.174	0.42	0.39	0	0	0.1	0.13	0.31	0.3	0.02	0	0.17	0.17
20	AL022344.4	linc from REP522 promoter	2	2	yes		UP	UP	ON	ON								0.05	0.02	0	0	0.33	0.719	0.06	0.02	0	0	0.31	0.71	0.03	0.01	0.03	0.02	0.39	0.72
21	GS1-179L18.1	linc from LTR/ERVL promoter	3	3	yes	yes	UP	UP	ON	ON								0.1	0.08	0	0	0.207	0.273	0.12	0.09	0	0	0.2	0.26	0.06	0.06	0.02	0.02	0.22	0.29
22	RP11-371I1.2	linc from LTR/ERV1 promoter	2	2	yes	yes	UP	UP	ON	ON								1.02	1.29	0	0	0.266	0.449	1.38	1.73	0	0	0.22	0.4	1.18	1.19	0	0.04	0.24	0.46
																				Average Protein coding		0.343867	0.468733			Average Protein coding		0.256667	0.39			Average Protein coding		0.336	0.448
																				Average lncRNAs		0.428286	0.457143			Average lncRNAs		0.372857	0.415714			Average lncRNAs		0.438571	0.502857
																				Average		0.370727	0.465045			Average		0.293636	0.398182			Average		0.368636	0.465455
																				Average Protein coding		0.39525				Average Protein coding		0.313214				Average Protein coding		0.378929
																				Average lncRNAs		0.442714				Average lncRNAs		0.394286				Average lncRNAs		0.470714

## Sheet: S7
Supplementary Table S7: Univariate and multivariate Cox regression models of TCGA LUAD and LUSC datasets.
	TCGA lung adenocarcinoma (LUAD)								TCGA lung squamous cell carcinoma (LUSC)
		Univariate				Multivariate				Univariate				Multivariate
		HR (95% CI)	P value			HR (95% CI)	P value			HR (95% CI)	P value			HR (95% CI)	P value
	MYEOV	1.49 (1.09 - 2.03)	0.01		MYEOV	1.42 (1.06 - 1.91)	0.02		MYEOV	1.46 (1.11 - 1.92)	0.008		MYEOV	1.41 (1.08 - 1.86)	0.01
	Stage	2.46 (1.77 - 3.38)	< 0.01		Stage	2.63 (1.92 - 3.57)	< 0.01		Stage	1.61 (1.15 - 2.20)	< 0.01		Stage	1.59 (1.14 - 2.18)	< 0.01
	Age	1.23 (0.90 - 1.67)	0.2						Age	1.18 (0.89 - 1.55)	0.24
	Gender	1.12 (0.82 - 1.52)	0.48						Gender	1.25 (0.92 - 1.75)	0.16
	Smoking	0.84 (0.55 - 1.32)	0.42
		Univariate								Univariate
		HR (95% CI)	P value							HR (95% CI)	P value
	ADPRHL1	0.86 (0.63 - 1.18)	0.35						ADPRHL1	1.21 (0.92 - 1.59)	0.18
	Stage	2.44 (1.76 - 3.35)	< 0.01						Stage	1.61 (1.16 - 2.21)	< 0.01
	Age	1.19 (0.87 - 1.62)	0.27						Age	1.21 (0.92 - 1.59)	0.18
	Gender	1.12 (0.82 - 1.52)	0.48						Gender	1.22 (0.89 - 1.70)	0.22
	Smoking	0.89 (0.59 - 1.40)	0.6
		Univariate								Univariate
		HR (95% CI)	P value							HR (95% CI)	P value
	AIM2	1.12 (0.82 - 1.53)	0.48						AIM2	1.17 (0.89 - 1.54)	0.27
	Stage	2.47 (1.78 - 3.39)	< 0.01						Stage	1.60 (1.14 - 2.19)	< 0.01
	Age	1.22 (0.89 - 1.66)	0.22						Age	1.22 (0.93 - 1.61)	0.15
	Gender	1.15 (0.72 - 1.72)	0.38						Gender	1.23 (0.90 - 1.71)	0.2
	Smoking	0.88 (0.58 - 1.39)	0.58
		Univariate								Univariate
		HR (95% CI)	P value							HR (95% CI)	P value
	ARL14	1.39 (1.02 - 1.90)	0.04						ARL14	1.28 (0.97 - 1.69)	0.08
	Stage	2.34 (1.68 - 3.23)	< 0.01						Stage	1.58 (1.13 - 2.17)	< 0.01
	Age	1.20 (088 - 1.63)	0.25						Age	1.16 (0.88 - 1.53)	0.3
	Gender	1.18 (0.86 - 1.61)	0.3						Gender	1.20 (0.87 - 1.67)	0.27
	Smoking	0.93 (0.61 - 1.46)	0.74
		Univariate				Multivariate				Univariate
		HR (95% CI)	P value			HR (95% CI)	P value			HR (95% CI)	P value
	CEP55	1.44 (1.06 - 1.99)	0.02		CEP55	1.35 (1.01 - 1.82)	0.043		CEP55	0.88 (0.67 - 1.17)	0.38
	Stage	2.43 (1.75 - 3.34)	< 0.01		Stage	2.59 (1.89 - 3.52)	< 0.01		Stage	1.60 (1.15 - 2.20)	< 0.01
	Age	1.28 (0.93 - 1.75)	0.13						Age	1.19 (0.90 - 1.56)	0.23
	Gender	1.10 (0.81 - 1.50)	0.54						Gender	1.25 (0.91 - 1.74)	0.18
	Smoking	0.85 (0.56 - 1.33)	0.46
		Univariate				Multivariate				Univariate
		HR (95% CI)	P value			HR (95% CI)	P value			HR (95% CI)	P value
	CT83	1.49 (1.09 - 2.03)	0.01		CT83	1.42 (1.06 - 1.91)	0.02		CT83	1.04 (0.74 - 1.43)	0.82
	Stage	2.38 (1.71 - 3.27)	< 0.01		Stage	2.58 (1.88 - 3.50)	< 0.01		Stage	1.58 (1.13 - 2.18)	< 0.01
	Age	1.26 (0.90 - 1.67)	0.2						Age	1.21 (0.92 - 1.59)	0.18
	Gender	1.15 (0.84 - 1.56)	0.38						Gender	1.22 (0.89 - 1.69)	0.22
	Smoking	0.83 (0.55 - 1.31)	0.42
		Univariate				Multivariate				Univariate
		HR (95% CI)	P value			HR (95% CI)	P value			HR (95% CI)	P value
	IGF2BP3	1.63 (1.20 - 2.24)	0.002		IGF2BP3	1.50 (1.12 - 2.03)	0.007		IGF2BP3	0.77 (0.59 - 1.02)	0.07
	Stage	2.33 (1.68 - 3.21)	< 0.01		Stage	2.52 (1.84 - 3.43)	< 0.01		Stage	1.57 (1.13 - 2.15)	< 0.01
	Age	1.28 (0.93 - 1.75)	0.12						Age	1.19 (0.90 - 1.56)	0.23
	Gender	1.15 (0.84 - 1.57)	0.38						Gender	1.23 (0.90 - 1.71)	0.2
	Smoking	0.94 (0.62 - 1.48)	0.79
		Univariate								Univariate
		HR (95% CI)	P value							HR (95% CI)	P value
	KAZALD1	1.13 (0.84 - 1.54)	0.42						KAZALD1	0.88 (0.67 - 1.15)	0.35
	Stage	2.43 (1.75 - 3.34)	< 0.01						Stage	1.58 (1.14 - 2.17)	< 0.01
	Age	1.20 (0.87 - 1.62)	0.27						Age	1.21 (0.92 - 1.59)	0.17
	Gender	1.13 (0.83 - 1.53)	0.45						Gender	1.22 (0.89 - 1.69)	0.23
	Smoking	0.90 (0.60 - 1.42)	0.64
		Univariate								Univariate
		HR (95% CI)	P value							HR (95% CI)	P value
	LRP1B	1.09 (0.80 - 1.48)	0.58						LRP1B	0.94 (0.74 - 1.24)	0.65
	Stage	2.47 (1.78 - 3.40)	< 0.01						Stage	1.57 (1.12 - 2.17)	< 0.01
	Age	1.20 (0.87 - 1.63)	0.26						Age	1.21 (0.92 - 1.59)	0.17
	Gender	1.12 (0.82 - 1.53)	0.46						Gender	1.22 (0.89 - 1.69)	0.23
	Smoking	0.90 (0.60 - 1.42)	0.65
		Univariate								Univariate
		HR (95% CI)	P value							HR (95% CI)	P value
	MAGEA1	1.58 (0.98 - 2.44)	0.06						MAGEA1	1.06 (0.81 - 1.40)	0.66
	Stage	2.47 (1.78 - 3.39)	< 0.01						Stage	1.56 (1.14 - 2.18)	< 0.01
	Age	1.22 (0.89 - 1.66)	0.22						Age	1.20 (0.91 - 1.58)	0.19
	Gender	1.09 (0.80 - 1.49)	0.57						Gender	1.21 (0.88 - 1.69)	0.24
	Smoking	0.87 (0.58 - 1.37)	0.53
		Univariate								Univariate
		HR (95% CI)	P value							HR (95% CI)	P value
	MAGEC2	0.93 (0.55 - 1.48)	0.76						MAGEC2	0.81 (0.61 - 1.10)	0.12
	Stage	2.48 (1.78 - 3.41)	< 0.01						Stage	1.60 (1.15 - 2.19)	< 0.01
	Age	1.20 (0.88 - 1.63)	0.26						Age	1.20 (0.91 - 1.58)	0.19
	Gender	1.13 (0.83 - 1.54)	0.43						Gender	1.20 (0.87 - 1.66)	0.27
	Smoking	0.90 (0.60 - 1.42)	0.65
		Univariate								Univariate
		HR (95% CI)	P value							HR (95% CI)	P value
	MKRN3	0.88 (0.64 - 1.20)	0.41						MKRN3	0.81 (0.62 - 1.07)	0.14
	Stage	2.49 (1.79 - 3.42)	< 0.01						Stage	1.61 (1.15 - 2.21)	< 0.01
	Age	1.21 (0.89 - 1.65)	0.22						Age	1.23 (0.94 - 1.63)	0.14
	Gender	1.15 (0.84 - 1.57)	0.38						Gender	1.25 (0.91 - 1.74)	0.17
	Smoking	0.91 (0.60 - 1.43)	0.68
		Univariate								Univariate
		HR (95% CI)	P value							HR (95% CI)	P value
	PLD1	1.30 (0.95 - 1.77)	0.1						PLD1	0.84 (0.64 - 1.10)	0.21
	Stage	2.46 (1.77 - 3.38)	< 0.01						Stage	1.60 (1.15 - 2.20)	< 0.01
	Age	1.26 (0.92 - 1.72)	0.15						Age	1.22 (0.93 - 1.61)	0.16
	Gender	1.15 (0.84 - 1.56)	0.38						Gender	1.24 (0.91 - 1.73)	0.18
	Smoking	0.90 (0.60 - 1.40)	0.62
		Univariate								Univariate
		HR (95% CI)	P value							HR (95% CI)	P value
	PON1	0.92 (0.67 - 1.24)	0.57						PON1	1.14 (0.87 - 1.50)	0.35
	Stage	2.46 (1.78 - 3.38)	< 0.01						Stage	1.60 (1.15 - 2.19)	< 0.01
	Age	1.20 (0.87 - 1.63)	0.26						Age	1.19 (0.91 -1.57)	0.21
	Gender	1.12 ( 0.82 - 1.53)	0.47						Gender	1.23 (0.90 - 1.72)	0.2
	Smoking	0.89 (0.59 - 1.40)	0.61
		Univariate								Univariate
		HR (95% CI)	P value							HR (95% CI)	P value
	PRAME	1.32 (0.98 - 1.81)	0.07						PRAME	0.86 (0.65 - 1.12)	0.26
	Stage	2.45 (1.77 - 3.37)	< 0.01						Stage	1.59 (1.14 - 2.18)	< 0.01
	Age	1.24 (0.90 - 1.68)	0.19						Age	1.21 (0.92 - 1.60)	0.17
	Gender	1.11 (0.82 - 1.52)	0.5						Gender	1.20 (0.88 - 1.67)	0.26
	Smoking	0.89 (0.59 - 1.40)	0.6
		Univariate								Univariate
		HR (95% CI)	P value							HR (95% CI)	P value
	AL022344.4	0.92 (0.58 - 1.38)	0.68						AL022344.4	1.36 (0.95 - 1.91)	0.09
	Stage	2.48 (1.78 - 3.42)	< 0.01						Stage	1.58 (1.13 - 2.17)	< 0.01
	Age	1.20 (0.87 - 1.63)	0.27						Age	1.23 (0.93 - 1.62)	0.15
	Gender	1.14 (0.83 - 1.55)	0.42						Gender	1.17 (0.85 - 1.64)	0.33
	Smoking	0.91 (0.60 - 1.43)	0.66
		Univariate				Multivariate				Univariate
		HR (95% CI)	P value			HR (95% CI)	P value			HR (95% CI)	P value
	LINC00857	1.46 (1.07 - 1.99)	0.02		LINC00857	1.37 (1.01 - 1.83)	0.04		LINC00857	1.22 (0.91 - 1.63)	0.18
	Stage	2.34 (1.68 - 3.22)	< 0.01		Stage	2.52 (1.84 - 3.43)	< 0.01		Stage	1.56 (1.12 - 2.14)	< 0.01
	Age	1.25 (0.91 - 1.70)	0.17						Age	1.21 (0.92 - 1.60)	0.17
	Gender	1.09 (0.80 - 1.49)	0.57						Gender	1.25 (0.91 - 1.74)	0.17
	Smoking	0.90 (0.60 - 1.41)	0.64
		Univariate								Univariate
		HR (95% CI)	P value							HR (95% CI)	P value
	GS1-179L18.1	1.11 (0.75 - 1.59)	0.6						GS1-179L18.1	0.98 (0.68 - 1.36)	0.89
	Stage	2.44 (1.76 - 3.36)	< 0.01						Stage	1.60 (1.14 - 2.19)	< 0.01
	Age	1.22 (0.89 - 1.66)	0.22						Age	1.21 (0.92 - 1.59)	0.18
	Gender	1.12 (0.82 - 1.53)	0.48						Gender	1.22 (0.89 - 1.70)	0.22
	Smoking	0.89 (0.59 - 1.40)	0.6
		Univariate								Univariate
		HR (95% CI)	P value							HR (95% CI)	P value
	PCAT7	0.91 (0.64 - 1.26)	0.57						PCAT7	1.00 (0.76 - 1.33)	0.97
	Stage	2.51 (1.80 - 3.47)	< 0.01						Stage	1.59 (1.14 - 2.18)	< 0.01
	Age	1.19 (0.87 - 1.63)	0.27						Age	1.21 (0.92 - 1.59)	0.18
	Gender	1.13 (0.83 - 1.54)	0.44						Gender	1.22 (0.89 - 1.70)	0.22
	Smoking	0.91 (0.60 - 1.42)	0.66
		Univariate								Univariate
		HR (95% CI)	P value							HR (95% CI)	P value
	RP11-371I1.2	0.89 (0.62 - 1.25)	0.5						RP11-371I1.2	1.01 (0.76 - 1.34)	0.95
	Stage	2.51 (1.80 - 3.47)	< 0.01						Stage	1.59 (1.14 - 2.18)	< 0.01
	Age	1.22 (0.89 - 1.66)	0.22						Age	1.21 (0.91 - 1.59)	0.19
	Gender	1.13 (0.83 - 1.54)	0.45						Gender	1.22 (0.89 - 1.70)	0.22
	Smoking	0.90 (0.60 - 1.42)	0.65
		Univariate								Univariate
		HR (95% CI)	P value							HR (95% CI)	P value
	RP11-564D11.3	1.35 (0.98 - 1.86)	0.07						RP11-564D11.3	0.85 (0.56 - 1.26)	0.44
	Stage	2.37 (1.70 - 3.26)	< 0.01						Stage	1.60 (1.15 - 2.19)	< 0.01
	Age	1.27 (0.92 - 1.73)	0.15						Age	1.20 (0.91 - 1.58)	0.19
	Gender	1.09 (0.80 - 1.49)	0.57						Gender	1.22 (0.89 - 1.70)	0.21
	Smoking	0.87 (0.57 - 1.36)	0.53
		Univariate								Univariate
		HR (95% CI)	P value							HR (95% CI)	P value
	RP1-90G24.10	1.25 (0.90 - 1.71)	0.78						RP1-90G24.10	1.02 (0.06 - 4.60)	0.98
	Stage	2.48 (1.79 - 3.41)	< 0.01						Stage	1.59 (1.14 - 2.18)	< 0.01
	Age	1.22 (0.89 - 1.66)	0.21						Age	1.21 (0.92 - 1.59)	0.18
	Gender	1.13 (0.83 - 1.54)	0.44						Gender	1.22 (0.89 -1.70)	0.22
	Smoking	0.92 (0.61 - 1.45)	0.72

## Sheet: S8
Supplementary Table S8: Gene expression profiling of SAECs treated with 5-aza-dC and TSA.
Feature number	ProbeID	Gene symbol	Annotation	logFC
16647	A_33_P3359017	CYP4F2	protein coding gene	12.6892
54065	A_33_P3233608	SPANXC	protein coding gene	11.4859
15318	A_32_P219660	SPANXA1	protein coding gene	11.317
26154	A_33_P3294277	CYP4F3	protein coding gene	11.0828
25948	A_23_P107454	KRTAP3-1	protein coding gene	10.8345
48702	A_33_P3230698	KIF1A	protein coding gene	10.5042
52047	A_21_P0012459	XLOC_l2_010338	linc	10.2528
828	A_23_P169017	DEFB103B	protein coding gene	10.0753
52255	A_33_P3363799	NCAM1	protein coding gene	9.91268
59358	A_23_P79108	ATP8B3	protein coding gene	9.71677
3473	A_23_P146274	STMN2	protein coding gene	9.66144
3030	A_24_P305784	SPANXB1	protein coding gene	9.64554
11468	A_23_P94472	FBP2	protein coding gene	9.63571
57820	A_33_P3368313	MT1H	protein coding gene	9.62858
25774	A_33_P3718734	LOC729083	lncRNA	9.62498
41061	A_32_P154473	KIF5C	protein coding gene	9.57003
39997	A_33_P6475164	LINC01447	linc	9.37555
61019	A_33_P3806965	FLJ13744	non coding RNA	9.32145
46316	A_19_P00316836	LINC01291	linc	9.28637
62013	A_21_P0007722	lnc-IFNG-2	linc	9.25503
14478	A_21_P0012935	XLOC_l2_012323	linc	9.24126
38051	A_23_P161659	SYT13	protein coding gene	9.08655
18733	A_33_P3215282	TTBK1	protein coding gene	9.0569
3237	A_23_P164196	DLX4	protein coding gene	9.04087
16111	A_23_P164405	KRTAP2-4	protein coding gene	9.0259
9194	A_33_P3420862	PAGE2B	protein coding gene	8.8637
30991	A_23_P258088	PACSIN1	protein coding gene	8.85464
6903	A_24_P365349	CACNG7	protein coding gene	8.8512
51616	A_23_P210224	DPYSL5	protein coding gene	8.78937
22107	A_23_P66881	RGS9	protein coding gene	8.72541
31900	A_23_P25396	NR1H4	protein coding gene	8.71759
542	A_23_P50710	CYP4F2	protein coding gene	8.68298
62760	A_23_P101671	ATCAY	protein coding gene	8.68113
11033	A_23_P302568	SLC30A3	protein coding gene	8.62098
1095	A_33_P3410806	CLDN10	protein coding gene	8.60961
9636	A_33_P3293164	CHGA	protein coding gene	8.60114
62023	A_23_P76749	GALNT16	protein coding gene	8.58618
34165	A_23_P82651	NPTX2	protein coding gene	8.48333
8440	A_33_P3220911	BST2	protein coding gene	8.47151
45096	A_33_P3221203	MMP13	protein coding gene	8.46986
18161	A_22_P00002791	lnc-C2CD4B-1	linc	8.44944
5720	A_24_P314477	TUBB2B	protein coding gene	8.44174
36105	A_22_P00001368	lnc-AP002478.1-2	lncRNA	8.42275
24105	A_32_P351968	HLA-DMB	protein coding gene	8.42184
21092	A_23_P76538	TESC	protein coding gene	8.42047
39434	A_33_P3366336	SBK1	protein coding gene	8.41945
4896	A_33_P3326483	CRABP1	protein coding gene	8.37097
28638	A_32_P101031	LYPD1	protein coding gene	8.35829
53468	A_23_P166087	RASSF2	protein coding gene	8.32959
3144	A_23_P108075	SLC7A10	protein coding gene	8.32326
10290	A_23_P425681	CCK	protein coding gene	8.252
24285	A_33_P3356816	LCE1B	protein coding gene	8.23677
56086	A_21_P0001880	LINC01293	linc	8.22567
16252	A_23_P307502	CDKN2A-AS1	antisense	8.22159
59567	A_24_P271696	XAGE1B	protein coding gene	8.18006
34292	A_23_P161218	ANKRD1	protein coding gene	8.1714
7969	A_33_P3480395	SCUBE1	protein coding gene	8.16197
25187	A_23_P155688	SPINK2	protein coding gene	8.16026
41686	A_33_P3733417	DRD2	protein coding gene	8.15651
30075	A_33_P3280759	LOC400867	lncRNA	8.11506
48312	A_22_P00010915		non coding RNA	8.10148
19314	A_23_P50250	CKM	protein coding gene	8.06062
25651	A_19_P00802607	lnc-HK2-1	linc	8.0338
55237	A_23_P353667	MIR7-3HG	lncRNA	8.02142
40050	A_32_P70927	PAGE2	protein coding gene	8.01711
38258	A_23_P166823	TNNC1	protein coding gene	7.99725
51702	A_23_P148541	CTAG1A	protein coding gene	7.99312
18243	A_23_P163492	BAIAP3	protein coding gene	7.96987
17257	A_32_P99019	FMR1NB	protein coding gene	7.95897
32716	A_33_P3532770	LOC283674		7.95267
1669	A_33_P3253792	CXorf67	protein coding gene	7.93052
44085	A_22_P00015999	LOC101928106	non coding RNA	7.91602
15081	A_33_P3302185	HS3ST6	protein coding gene	7.91519
25819	A_23_P259901	TKTL1	protein coding gene	7.90337
6562	A_22_P00015676			7.89149
49692	A_33_P3420224	ENTPD8	protein coding gene	7.8876
14523	A_32_P33083	VCX2	protein coding gene	7.88723
20221	A_23_P201747	PADI2	protein coding gene	7.88368
56007	A_23_P31739	STMN4	protein coding gene	7.85007
51478	A_33_P3249534	NEFM	protein coding gene	7.84809
15856	A_23_P159191	GAST	protein coding gene	7.84538
57947	A_23_P94103	SCARA5	protein coding gene	7.83952
54583	A_33_P3211198	NCMAP	protein coding gene	7.82943
24375	A_21_P0009625	LOC100996324	lncRNA	7.78705
37170	A_24_P224488	MAPT	protein coding gene	7.78254
47185	A_23_P326893	CCDC151	protein coding gene	7.77646
22794	A_23_P102391	SLC40A1	protein coding gene	7.7675
55006	A_33_P3322519	VWA5B2	protein coding gene	7.74185
55447	A_24_P31275	ATP1B2	protein coding gene	7.72147
13758	A_23_P68487	BMP7	protein coding gene	7.70315
1840	A_23_P321501	DHRS2	protein coding gene	7.68802
6516	A_33_P3308332	PLEKHB1	protein coding gene	7.65083
56094	A_22_P00006427	LOC101929181	lncRNA	7.6451
50562	A_23_P329340			7.64353
8010	A_21_P0014143	LINC01511	linc	7.64263
22686	A_23_P157628	DEFB4A	protein coding gene	7.59103
20701	A_22_P00008976	LINC00668	linc	7.59031
26616	A_23_P436369	FILIP1	protein coding gene	7.57271
52345	A_33_P3262742	DAPL1	protein coding gene	7.56698
39078	A_33_P3241204	CALHM3	protein coding gene	7.55663
37	A_33_P3293593	TTC9B	protein coding gene	7.55188
29259	A_22_P00010618	LOC101929056	non coding RNA	7.54394
41414	A_21_P0012685	LOC100507639	lncRNA	7.5387
28249	A_22_P00009163	LOC102723465	non coding RNA	7.53382
54254	A_23_P92730	HSPB3	protein coding gene	7.51536
247	A_23_P315451	KIRREL2	protein coding gene	7.50569
56980	A_23_P150343	SLN	protein coding gene	7.50365
59381	A_33_P3233645	MT1G	protein coding gene	7.48113
10491	A_33_P3276703	VGF	protein coding gene	7.47225
42569	A_23_P140876	ABCA3	protein coding gene	7.47029
1218	A_33_P3388192	GTSF1	protein coding gene	7.44054
13099	A_23_P161297	OGDHL	protein coding gene	7.43805
45984	A_23_P349406	RIMKLA	protein coding gene	7.40205
8273	A_23_P254688	TMEM108	protein coding gene	7.3936
34280	A_23_P30294	CDO1	protein coding gene	7.38506
47029	A_24_P65941	RUNX1-IT1	lncRNA	7.35359
41324	A_32_P69368	ID2	protein coding gene	7.34748
60171	A_23_P124905	NPTX1	protein coding gene	7.32676
10736	A_23_P255672	ABLIM2	protein coding gene	7.3224
41187	A_33_P3382399	KRTAP3-1	protein coding gene	7.32094
4965	A_23_P119611	FXYD7	protein coding gene	7.31894
4209	A_23_P165598	DAPL1	protein coding gene	7.31818
57728	A_23_P205164	POU4F1	protein coding gene	7.31738
54752	A_33_P3243454	IGFL3	protein coding gene	7.31094
19685	A_23_P312300	SCGB2A1	protein coding gene	7.30834
50711	A_32_P131640	SLITRK4	protein coding gene	7.30463
17266	A_23_P312851	PMEL	protein coding gene	7.29352
22038	A_23_P435874	SPATA31A3	protein coding gene	7.28078
24103	A_24_P139665	HPCAL4	protein coding gene	7.27
19462	A_22_P00010710	lnc-NFYB-1	linc	7.2649
53000	A_23_P143143	ID2	protein coding gene	7.24779
46575	A_23_P140450	SLC27A2	protein coding gene	7.24476
54383	A_24_P124624	OLR1	protein coding gene	7.22769
39270	A_23_P135381	SP5	protein coding gene	7.22139
15178	A_24_P185945	MAGEA4	protein coding gene	7.21348
24681	A_23_P119916	WNT6	protein coding gene	7.20621
8146	A_23_P26457	HBA2	protein coding gene	7.20255
8389	A_33_P3330952	ATP8A1	protein coding gene	7.19022
41854	A_33_P3284129	LYPD1	protein coding gene	7.18849
29258	A_33_P3222183	DPYSL5	protein coding gene	7.1847
19256	A_21_P0013061	XLOC_l2_012871	linc	7.17621
62477	A_33_P3265111	MIR7-3HG	lncRNA	7.17048
57360	A_32_P128209	LINC01554	linc	7.16042
4158	A_32_P356316	HLA-DOA	protein coding gene	7.15353
58481	A_21_P0012848	XLOC_l2_011744	linc	7.14551
5912	A_21_P0013007	LOC643201		7.14179
41520	A_24_P230282	VCX2	protein coding gene	7.14167
49294	A_23_P115261	AGT	protein coding gene	7.13771
10216	A_23_P115261	AGT	protein coding gene	7.13603
46639	A_33_P3258362	HBA2	protein coding gene	7.12804
33121	A_23_P94517	BRINP1	protein coding gene	7.11918
12221	A_23_P168403	KCNH2	protein coding gene	7.11431
55220	A_23_P115261	AGT	protein coding gene	7.11084
49969	A_23_P82503	PEG10	protein coding gene	7.10171
23210	A_23_P159952	BEX1	protein coding gene	7.08696
20137	A_23_P375165	TEX19	protein coding gene	7.0841
37390	A_33_P3313283	CILP2	protein coding gene	7.07711
59499	A_23_P386942	DIRAS1	protein coding gene	7.07272
13066	A_32_P29965	MAGEA9	protein coding gene	7.05485
57255	A_21_P0008064			7.04955
17051	A_32_P50223	PLK5	protein coding gene	7.04741
7433	A_33_P3475906	LOC100130331	pseudogene	7.04505
6005	A_33_P3400843	C1QL4	protein coding gene	7.04461
59025	A_23_P115261	AGT	protein coding gene	7.04212
42928	A_23_P19754	CPA4	protein coding gene	7.04176
39705	A_23_P101521	IZUMO2	protein coding gene	7.03971
40433	A_24_P854492	MIAT	lncRNA	7.03587
20157	A_21_P0006851	lnc-LYZL1-1	linc	7.0235
28114	A_23_P114934	MAEL	protein coding gene	7.02205
14103	A_23_P129133	OCA2	protein coding gene	6.99576
14997	A_33_P3408757	FOXO6	protein coding gene	6.97042
15753	A_33_P3214948	SPOCK2	protein coding gene	6.96679
40450	A_33_P3220470	SMAD6	protein coding gene	6.93531
41363	A_23_P115261	AGT	protein coding gene	6.93377
38105	A_23_P256470	NPY	protein coding gene	6.92603
23091	A_23_P349463	CHP2	protein coding gene	6.92557
8898	A_23_P399255	RNF182	protein coding gene	6.91758
38391	A_23_P115261	AGT	protein coding gene	6.90662
42177	A_23_P114185	TSPAN7	protein coding gene	6.90627
56726	A_23_P115261	AGT	protein coding gene	6.90243
55294	A_22_P00014395	LOC102723346	non coding RNA	6.901
23738	A_23_P137173	TMSB15A	protein coding gene	6.89448
13228	A_24_P706340	FAM155A	protein coding gene	6.89441
33766	A_33_P3387646	LOC643201	pseudogene	6.89241
13990	A_24_P228796	GAGE7	other	6.88416
23106	A_23_P107247	CACNA1G	protein coding gene	6.87371
15488	A_32_P183904	SHF	protein coding gene	6.86833
51033	A_21_P0012465	LINC01214	linc	6.85292
54978	A_22_P00012795	LINC01419	linc	6.85081
10940	A_23_P146233	LPL	protein coding gene	6.84299
15853	A_23_P427122	ART5	protein coding gene	6.83865
31290	A_23_P39465	BST2	protein coding gene	6.83588
14470	A_21_P0000882	RNF157-AS1	antisense	6.83206
40948	A_24_P248240	SYT11	protein coding gene	6.82858
39620	A_21_P0012663	XLOC_l2_011102	linc	6.82331
59788	A_23_P389987	TLX2	protein coding gene	6.81422
50033	A_23_P115261	AGT	protein coding gene	6.80682
49883	A_23_P115261	AGT	protein coding gene	6.80343
22382	A_33_P3376095	SYPL2	protein coding gene	6.79815
15974	A_33_P3312499	MS4A15	protein coding gene	6.79437
53126	A_23_P86470	CH25H	protein coding gene	6.79306
38094	A_32_P209960	CIITA	protein coding gene	6.79019
19410	A_33_P3316118	SNAP91	protein coding gene	6.77417
46476	A_21_P0009781	UCA1	lncRNA	6.76382
15986	A_33_P3285565	CLDN3	protein coding gene	6.76187
29947	A_33_P3229953	EEF1A2	protein coding gene	6.75079
62231	A_24_P277657	GMPR	protein coding gene	6.74632
60264	A_23_P169351	SH3GL2	protein coding gene	6.74632
58146	A_23_P217554	MAGEA8	protein coding gene	6.73363
57355	A_23_P120863	GAL3ST1	protein coding gene	6.72803
26270	A_21_P0004928	lnc-NT5DC1-4	lncRNA	6.72575
49591	A_33_P3294533	PRKCB	protein coding gene	6.71972
54826	A_24_P261470	NRXN2	protein coding gene	6.71225
47001	A_23_P250102	CAND2	protein coding gene	6.70676
60464	A_23_P138524	CPXM2	protein coding gene	6.69327
556	A_23_P125233	CNN1	protein coding gene	6.693
55548	A_21_P0000795	LINC00624	linc	6.6905
18798	A_23_P93169	LGSN	protein coding gene	6.6876
46925	A_33_P3213797	KCNK7	protein coding gene	6.68609
47537	A_22_P00013725	LOC643201	pseudogene	6.68418
20437	A_23_P217570	CAPN6	protein coding gene	6.65704
7776	A_23_P166269	FAM3B	protein coding gene	6.64037
46247	A_32_P60635	C11orf97	other	6.63661
16892	A_21_P0000578	PHKA2-AS1	antisense	6.62828
1219	A_23_P19134	GPR98	protein coding gene	6.62634
10861	A_33_P3305780	CCNI2	protein coding gene	6.62466
8948	A_33_P3222653	LINC00605	linc	6.62306
34762	A_23_P32165	LHX2	protein coding gene	6.62033
9138	A_23_P83298	PRRX2	protein coding gene	6.61401
20265	A_33_P3261595	ANKRD34B	protein coding gene	6.61338
29388	A_33_P3225022	FTCD	protein coding gene	6.59683
25612	A_21_P0012166	LINC01271	linc	6.59322
2182	A_32_P100830	KIF19	protein coding gene	6.59231
42317	A_32_P156851	RCAN2	protein coding gene	6.5896
49937	A_33_P3218960	CACNA1H	protein coding gene	6.58622
43520	A_33_P3301709	GNG4	protein coding gene	6.58228
19183	A_23_P167818	FAM184A	protein coding gene	6.57767
15242	A_24_P313431	CBLN1	protein coding gene	6.57628
23531	A_23_P307382	SLC32A1	protein coding gene	6.57329
18934	A_24_P191781	PARM1	protein coding gene	6.57265
47594	A_32_P183367	CELF4	protein coding gene	6.57232
19657	A_23_P372834	AQP1	protein coding gene	6.56825
22857	A_23_P100730	SKAP1	protein coding gene	6.56485
2913	A_23_P214244	ENPP5	protein coding gene	6.56428
11058	A_21_P0012664	LOC102723415	non coding RNA	6.5618
9485	A_32_P75902	MEIOB	protein coding gene	6.5532
56003	A_23_P67453	TNNI3	protein coding gene	6.54884
37499	A_32_P192376	ENPP1	protein coding gene	6.54715
14600	A_23_P24774	ABCC8	protein coding gene	6.54276
58961	A_23_P42975	PRKAR2B	protein coding gene	6.53939
28577	A_22_P00025522	CLEC4GP1	pseudogene	6.53932
20662	A_21_P0008607	LOC100507480	non coding RNA	6.5393
32865	A_33_P3289121	C2orf40	protein coding gene	6.53001
54911	A_22_P00006211	lnc-FAM43A-7	linc	6.52902
8612	A_33_P3381378	PAX1	protein coding gene	6.52565
38696	A_23_P26386	TPPP3	protein coding gene	6.52466
35325	A_23_P113111	AR	protein coding gene	6.49657
48270	A_32_P125338	FAM43B	protein coding gene	6.49447
53811	A_23_P45324	TMEM35	protein coding gene	6.48902
52855	A_33_P3391915	BTBD17	protein coding gene	6.48782
14462	A_32_P152195	STAC2	protein coding gene	6.47678
35281	A_23_P302672	DDIT4L	protein coding gene	6.4745
30607	A_22_P00022805			6.47196
30078	A_23_P360964	DACT3	protein coding gene	6.47024
44917	A_21_P0014444	LOC100507639	lncRNA	6.46304
6641	A_21_P0006292	lnc-AUH-4	linc	6.45986
52733	A_24_P827037	LRRC15	protein coding gene	6.4549
34418	A_23_P7562	ACSL6	protein coding gene	6.44118
37278	A_23_P417918	PENK	protein coding gene	6.43573
4008	A_32_P9543	APOBEC3A	protein coding gene	6.4321
18768	A_23_P150316	MMP12	protein coding gene	6.42952
4026	A_23_P157136	SCIN	protein coding gene	6.42132
13872	A_23_P125809	ZCCHC12	protein coding gene	6.41442
55197	A_23_P389897	NGFR	protein coding gene	6.40854
44355	A_33_P3382860	RND2	protein coding gene	6.40645
3512	A_33_P3322804	NTRK2	protein coding gene	6.40534
2073	A_23_P337262	APCDD1	protein coding gene	6.40404
276	A_23_P29975	C4orf19	protein coding gene	6.40101
29417	A_24_P365015	HOXB13	protein coding gene	6.40046
31869	A_33_P3348714	FGF9	protein coding gene	6.39983
4673	A_33_P3337134	ABLIM2	protein coding gene	6.3944
310	A_33_P3373273	SLC15A1	protein coding gene	6.38869
3157	A_23_P324327	GPRC5B	protein coding gene	6.38378
57869	A_23_P152398	MT4	protein coding gene	6.38367
36626	A_33_P3209229	RAB26	protein coding gene	6.38171
32808	A_33_P3287785	NEFL	protein coding gene	6.38003
53648	A_22_P00007283	lnc-GPR20-1	linc	6.37753
43199	A_33_P3407356	LINC01348	linc	6.37444
16504	A_33_P3315470	LINC01018	linc	6.37435
42152	A_33_P3304983	PRKAR2B	protein coding gene	6.37143
41714	A_23_P401774	ELMOD1	protein coding gene	6.36988
23750	A_23_P91552	FTCD	protein coding gene	6.36942
50723	A_32_P71571	FAM19A4	protein coding gene	6.34852
61143	A_23_P215913	CLU	protein coding gene	6.34847
49673	A_23_P89431	CCL2	protein coding gene	6.33936
48112	A_23_P327551	CPNE4	protein coding gene	6.33848
29100	A_33_P3342375	MAGEA6	protein coding gene	6.33717
29917	A_32_P212471	RIIAD1	protein coding gene	6.33479
39972	A_33_P3326767			6.33346
51573	A_23_P1102	ACTA1	protein coding gene	6.33067
62705	A_24_P280274	S100A7A	protein coding gene	6.32939
14792	A_33_P3232214		pseudogene	6.32741
47038	A_23_P89431	CCL2	protein coding gene	6.31791
9938	A_23_P203173	IL10RA	protein coding gene	6.31246
302	A_23_P207632	ATP2A3	protein coding gene	6.31199
10191	A_33_P3285540	CLDN5	protein coding gene	6.30976
58485	A_33_P3304242	DNAI1	protein coding gene	6.30948
52702	A_21_P0013836	XLOC_l2_015849	linc	6.30625
14983	A_23_P158318	ROR2	protein coding gene	6.28664
451	A_24_P930741	EPHA10	protein coding gene	6.28402
3252	A_23_P41804	NKD2	protein coding gene	6.2774
26070	A_22_P00003561	lnc-CCRN4L-7	linc	6.27216
2698	A_24_P86993	JAM3	protein coding gene	6.26836
47811	A_33_P3407863	lnc-GABRE-1	lncRNA	6.26612
50929	A_23_P163402	CYP1A1	protein coding gene	6.2643
8915	A_22_P00014909	TPBGL	protein coding gene	6.25993
62357	A_23_P13713	PRPH	protein coding gene	6.25619
55001	A_21_P0014031	MAPT	protein coding gene	6.24996
39545	A_32_P185317	MNX1-AS1	antisense	6.2434
24830	A_33_P3323945	CEND1	protein coding gene	6.24313
14764	A_22_P00016480	lnc-TMEM88B-1	lncRNA	6.23278
3599	A_32_P3476	RPRML	protein coding gene	6.22717
35103	A_21_P0007215	lnc-PPP1R32-1	linc	6.22555
20553	A_32_P200238	UCA1	lncRNA	6.22289
517	A_23_P157007	TMEM176B	protein coding gene	6.22219
14000	A_21_P0004369	lnc-CDH9-2	linc	6.22148
56827	A_33_P3228402		not annotated	6.22093
24233	A_24_P77968	FLNC	protein coding gene	6.21667
17046	A_21_P0013596			6.21575
32310	A_33_P3337485	CD248	protein coding gene	6.2122
12750	A_24_P253003	WNT11	protein coding gene	6.20497
22442	A_23_P300600	NEFH	protein coding gene	6.18873
55145	A_21_P0006031	LOC101928014		6.188
61903	A_21_P0003164	lnc-KLF15-3	linc	6.18241
42189	A_23_P21092	CALB2	protein coding gene	6.18042
45489	A_21_P0006426	PABPC1L2B-AS1	antisense	6.17775
62530	A_23_P88767	PLA2G10	protein coding gene	6.17392
51143	A_24_P150791	JPH3	protein coding gene	6.17309
45420	A_23_P85693	GBP2	protein coding gene	6.17209
20818	A_24_P355626	ABCG4	protein coding gene	6.17099
57258	A_33_P3535972	CELF4	protein coding gene	6.16897
45976	A_24_P153840	FGD3	protein coding gene	6.15342
46466	A_33_P3299761	KRT23	protein coding gene	6.15249
42341	A_23_P155057	CYTH4	protein coding gene	6.15088
53861	A_21_P0005622			6.14906
50152	A_33_P3316953	RBFOX3	protein coding gene	6.14815
27617	A_23_P217319	FGF13	protein coding gene	6.14093
43017	A_23_P397120	SMIM24	protein coding gene	6.13288
20014	A_23_P40295	LAMP5	protein coding gene	6.12777
47	A_22_P00025188			6.12706
57118	A_23_P77993	C1QL1	protein coding gene	6.12602
36506	A_23_P401700	APBB1IP	protein coding gene	6.1204
22538	A_24_P303091	CXCL10	protein coding gene	6.10589
39036	A_24_P245838	MGAT3	protein coding gene	6.1054
17271	A_23_P379649	BMF	protein coding gene	6.10483
21195	A_32_P109683	PAGE2B	protein coding gene	6.09595
62668	A_23_P143981	FBLN2	protein coding gene	6.09136
19198	A_32_P133090			6.08995
38871	A_24_P410408	KRT83	protein coding gene	6.07966
50095	A_23_P89431	CCL2	protein coding gene	6.07848
31121	A_23_P96291	MAGEA1	protein coding gene	6.0753
3016	A_33_P3795649			6.07511
29562	A_32_P147622	MCF2L-AS1	antisense	6.07464
60489	A_23_P215048	KIAA0408	protein coding gene	6.07201
53171	A_24_P280846	GOLT1A	protein coding gene	6.07165
10154	A_23_P354908	NMNAT2	protein coding gene	6.0684
48101	A_33_P3881812	IRGM	protein coding gene	6.06683
18661	A_21_P0002467	lnc-SUCLG1-2	linc	6.06424
58452	A_33_P3280845	THY1	protein coding gene	6.05259
52668	A_24_P187970	PADI2	protein coding gene	6.04154
48599	A_33_P3846177	B4GALNT1	protein coding gene	6.0406
50860	A_21_P0002880	lnc-RYK-1	linc	6.03465
30614	A_23_P157926	LINGO2	protein coding gene	6.02725
1298	A_21_P0005753	lnc-UTP23-2	linc	6.02576
20552	A_23_P73571	MUM1L1	protein coding gene	6.02502
30911	A_23_P7313	SPP1	protein coding gene	6.02266
31120	A_23_P84118	CDH18	protein coding gene	6.02088
46406	A_23_P90470		not annotated	6.01966
22282	A_23_P145786	MLXIPL	protein coding gene	6.01783
35656	A_33_P3275220	NRK	protein coding gene	6.01121
172	A_33_P3231739	ELOVL2	protein coding gene	6.01006
53001	A_23_P88303	HSPA2	protein coding gene	6.00867
11633	A_21_P0004080	LINC01574	linc	6.00776
8619	A_23_P66854	KRT20	protein coding gene	6.00289
50647	A_23_P139786	OASL	protein coding gene	5.99827
45517	A_32_P87697	HLA-DRA	protein coding gene	5.99122
5216	A_24_P51909	CPLX1	protein coding gene	5.99025
47103	A_22_P00025235			5.98856
59582	A_24_P332857	CT47A11	protein coding gene	5.98385
6437	A_23_P137665	CHI3L1	protein coding gene	5.98383
11709	A_21_P0010448	lnc-SMC1B-2	linc	5.9744
7649	A_23_P152047	SCAMP5	protein coding gene	5.97218
13044	A_33_P3255290	JAKMIP2	protein coding gene	5.97068
19313	A_23_P121144	LYZL4	protein coding gene	5.96745
29039	A_23_P77731	CRYM	protein coding gene	5.96743
5540	A_23_P163567	SMPD3	protein coding gene	5.96692
36175	A_32_P110655	LINC00633	linc	5.96592
56170	A_19_P00320101	MIR4697HG	lncRNA	5.96315
61309	A_23_P20443	LZTS1	protein coding gene	5.96253
14737	A_23_P82775	SOX17	protein coding gene	5.96021
25045	A_22_P00005649			5.95776
18705	A_24_P104407	SYNM	protein coding gene	5.95123
50203	A_22_P00012698	lnc-RAB1A-1	linc	5.95003
466	A_23_P140821	PARD6A	protein coding gene	5.93544
49574	A_33_P3610406	ECEL1P2	pseudogene	5.92671
57124	A_33_P3409467	GCGR	protein coding gene	5.92554
14634	A_33_P3299416	GRASP	protein coding gene	5.92066
54593	A_21_P0004244	lnc-CCDC152-1	linc	5.91649
24181	A_24_P264943	COMP	protein coding gene	5.91304
52563	A_23_P142606	CRYGC	protein coding gene	5.91287
4078	A_33_P3258056	PALM3	protein coding gene	5.91006
51214	A_22_P00004113	LOC101928223	non coding RNA	5.90399
30094	A_21_P0000727	LINC01010	linc	5.89305
40930	A_21_P0010823	XLOC_l2_001569	linc	5.89057
38978	A_23_P212608	CLSTN2	protein coding gene	5.88587
8338	A_33_P3408152	NEFH	protein coding gene	5.88534
35494	A_23_P259344	CECR6	protein coding gene	5.87597
40522	A_23_P370666	GLYATL1	protein coding gene	5.87429
1869	A_33_P3354847	C9orf171	protein coding gene	5.87232
20959	A_21_P0013141		pseudogene	5.86957
15872	A_23_P416774	CLIC5	protein coding gene	5.86753
12716	A_23_P163455	MAP1A	protein coding gene	5.86567
57216	A_23_P89431	CCL2	protein coding gene	5.85709
1593	A_33_P3302320	LINC01251	linc	5.85613
8589	A_33_P3298159	PTGDS	protein coding gene	5.85255
7215	A_23_P163087	NID2	protein coding gene	5.85178
53992	A_23_P430728	ATP4A	protein coding gene	5.85169
33326	A_23_P115261	AGT	protein coding gene	5.84316
49971	A_23_P153964	INHBB	protein coding gene	5.84079
24691	A_33_P3381666	ABLIM2	protein coding gene	5.83363
34324	A_23_P413641	PREX1	protein coding gene	5.83345
4224	A_23_P89431	CCL2	protein coding gene	5.83211
47607	A_21_P0007435	LOC101928812	lncRNA	5.82975
48972	A_23_P416581	GNAZ	protein coding gene	5.82948
54685	A_33_P3411328	LINC01136	linc	5.829
24354	A_33_P3290040	CPT1C	protein coding gene	5.82766
61217	A_23_P47924	PTPRR	protein coding gene	5.82656
45374	A_32_P14721	DNAH12	protein coding gene	5.81926
16385	A_23_P48585	SALL2	protein coding gene	5.81886
21753	A_23_P518	VTCN1	protein coding gene	5.81869
7673	A_22_P00001865			5.81498
8345	A_21_P0012598	XLOC_l2_010724	linc	5.81427
29190	A_23_P501193	KCNJ16	protein coding gene	5.81201
21494	A_23_P89431	CCL2	protein coding gene	5.80572
24287	A_23_P8820	FABP4	protein coding gene	5.80469
41059	A_23_P71270	AZGP1	protein coding gene	5.80262
57284	A_22_P00008561	KCNN3	protein coding gene	5.80049
46817	A_23_P333029	ERICH5	protein coding gene	5.79979
50612	A_24_P208825	MUC4	protein coding gene	5.78675
53075	A_23_P349966	TMEM130	protein coding gene	5.78336
404	A_24_P11061	CSAG1	protein coding gene	5.78295
5092	A_33_P3313864	lnc-CTIF-1	linc	5.7803
25498	A_23_P65278	NBEA	protein coding gene	5.76748
31028	A_23_P62099	MAGEC2	protein coding gene	5.76332
37782	A_21_P0013150	LOC100422737		5.76298
27063	A_23_P204885	PCDH20	protein coding gene	5.76257
44557	A_22_P00016125	lnc-TIGD2-1	lncRNA	5.76237
1049	A_22_P00021123	lnc-CHAC1-2	linc	5.76027
48816	A_23_P10025	NELL2	protein coding gene	5.75338
55520	A_33_P3356821	LCE1C	protein coding gene	5.75329
59137	A_33_P3252286	CRLF1	protein coding gene	5.75277
20700	A_21_P0011750		pseudogene	5.7517
8732	A_33_P3222947	TMEM114	protein coding gene	5.7488
41145	A_23_P37942	CLDN6	protein coding gene	5.73726
46208	A_33_P3220738	ASTN1	protein coding gene	5.73294
20067	A_21_P0001392	OVAAL	lncRNA	5.73173
40461	A_23_P314811	SLC10A4	protein coding gene	5.73053
46012	A_21_P0005616	LINC01419	linc	5.73016
28702	A_22_P00021096	HCG14	lncRNA	5.7288
35799	A_24_P13024	SLC16A12	protein coding gene	5.72847
37589	A_23_P153616	MADCAM1	protein coding gene	5.72327
8391	A_23_P7313	SPP1	protein coding gene	5.71934
30818	A_23_P376036	EXD1	protein coding gene	5.71539
62960	A_33_P3266484	OR13F1	protein coding gene	5.70534
36588	A_23_P151710	PTGER2	protein coding gene	5.70478
54970	A_24_P401491	MORN5	protein coding gene	5.70278
34186	A_24_P275073	ADAMTS14	protein coding gene	5.69952
34897	A_23_P7313	SPP1	protein coding gene	5.69121
3901	A_23_P217228	TRO	protein coding gene	5.68952
19086	A_21_P0006440			5.68718
57408	A_21_P0000582	LOC100134317	lncRNA	5.68655
49307	A_23_P89431	CCL2	protein coding gene	5.68362
59526	A_23_P320242	KIAA1324L	protein coding gene	5.68139
43546	A_21_P0012019	LOC100506563	non coding RNA	5.681
39860	A_21_P0009394	lnc-AMZ2-1	linc	5.68024
47823	A_32_P352358	LOC650293		5.67977
56212	A_23_P99373	RNF17	protein coding gene	5.67879
39555	A_33_P3289845	IGFL1	protein coding gene	5.67504
14824	A_33_P3286162		not annotated	5.67354
16365	A_33_P3293213	RGL3	protein coding gene	5.67286
53307	A_33_P3374190	INPP5A	protein coding gene	5.67231
17845	A_24_P13285	PPP1R1A	protein coding gene	5.66826
18695	A_21_P0009343	TBX2-AS1	antisense	5.66764
30122	A_21_P0012954			5.66753
23012	A_33_P3369706	LINC01574	linc	5.66726
23981	A_23_P10172	PRSS50	protein coding gene	5.65376
275	A_22_P00003178			5.64977
59607	A_21_P0001441	lnc-C1orf31-7	linc	5.64799
836	A_22_P00000694		non coding RNA	5.64664
11647	A_23_P73632	NR0B1	protein coding gene	5.64621
51717	A_21_P0004807	LOC101929484	non coding RNA	5.63953
19233	A_23_P123596	GLDC	protein coding gene	5.63897
55115	A_33_P3385266	ABCC6	protein coding gene	5.63881
26686	A_21_P0011749	XLOC_l2_007059	linc	5.6381
46550	A_23_P304110	SOWAHA	protein coding gene	5.63727
15819	A_23_P89431	CCL2	protein coding gene	5.63526
32381	A_21_P0003041	lnc-RNF13-2	linc	5.63387
54649	A_21_P0007497	LINC01234	linc	5.6322
22307	A_23_P3911	PLXDC1	protein coding gene	5.63106
59591	A_24_P945096	CACNA1I	protein coding gene	5.63065
13951	A_23_P125383	TMEFF2	protein coding gene	5.62823
20698	A_21_P0012481		non coding RNA	5.62691
30971	A_23_P54144	BMP4	protein coding gene	5.62613
46867	A_21_P0004397	lnc-ACTBL2-1	lncRNA	5.62558
20615	A_33_P3364038	IRGM	protein coding gene	5.62479
32100	A_21_P0014697	LOC101060542	lncRNA	5.61402
23104	A_23_P156390	JAKMIP2	protein coding gene	5.61289
32441	A_21_P0014662	LOC100507395	non coding RNA	5.61111
14192	A_21_P0005820			5.60968
6186	A_23_P126167	KCNN3	protein coding gene	5.60849
17518	A_22_P00016648			5.60662
943	A_33_P3367301	GJD3	protein coding gene	5.60169
40010	A_21_P0000685	LOC100286922	pseudogene	5.60083
9874	A_23_P148255	MAGEA2B	protein coding gene	5.59916
13125	A_23_P23029	BSND	protein coding gene	5.59711
34058	A_23_P201066	SUSD4	protein coding gene	5.59416
47047	A_23_P7313	SPP1	protein coding gene	5.59349
1079	A_33_P3393331	MFSD6L	protein coding gene	5.59269
59559	A_22_P00015400	LOC102723834	non coding RNA	5.5909
31183	A_33_P3289296	TMEM37	protein coding gene	5.5892
14498	A_33_P3281985	CR2	protein coding gene	5.58524
60370	A_23_P77908	SLC47A2	protein coding gene	5.58285
29941	A_24_P174793	PCSK1	protein coding gene	5.58184
29263	A_23_P99063	LUM	protein coding gene	5.58085
31710	A_23_P31798	NAT2	protein coding gene	5.57959
25831	A_21_P0003382	LOC101929448	lncRNA	5.57839
30720	A_24_P580248	XLOC_l2_000384	linc	5.57696
36890	A_33_P3287158	NLGN4X	protein coding gene	5.57471
607	A_24_P154868	MEP1A	protein coding gene	5.5729
55751	A_24_P37253	LYPD6	protein coding gene	5.56755
18873	A_33_P3336562			5.56751
2999	A_23_P82929	NOV	protein coding gene	5.56747
15221	A_33_P3336587	LOC283710		5.56615
29973	A_23_P7313	SPP1	protein coding gene	5.56412
49080	A_24_P344961	AMOT	protein coding gene	5.5597
26446	A_23_P7313	SPP1	protein coding gene	5.55906
43421	A_23_P326760	MYRIP	protein coding gene	5.55815
39268	A_23_P146134	DUSP26	protein coding gene	5.5576
10440	A_23_P109072	SALL4	protein coding gene	5.55607
16043	A_23_P417974	AQP11	protein coding gene	5.55285
13471	A_22_P00013724	lnc-RP11-817J15.3.1-2	lncRNA	5.55052
37350	A_23_P352494	RHOXF2	protein coding gene	5.55035
19936	A_22_P00015399	lnc-SRP9-1	linc	5.5483
3812	A_33_P3229552	LRFN1	protein coding gene	5.54564
11007	A_32_P109604	ANKRD20A12P	pseudogene	5.54449
62623	A_23_P116414	PLA2G16	protein coding gene	5.5426
931	A_23_P94338	ENPP2	protein coding gene	5.54175
4645	A_23_P54488	ACSBG1	protein coding gene	5.5415
11118	A_21_P0003085	lnc-FAM43A-6	linc	5.53848
50968	A_33_P3212172	SNX22	protein coding gene	5.53699
23835	A_23_P74290	GBP5	protein coding gene	5.52863
60622	A_23_P98121	FXYD4	protein coding gene	5.52756
22647	A_23_P116414	PLA2G16	protein coding gene	5.52543
58814	A_21_P0007204	LOC101928812	lncRNA	5.52153
32699	A_33_P3362008	NPPB	protein coding gene	5.52036
4997	A_33_P3225066	DNAJC12	protein coding gene	5.51583
12518	A_23_P4096	CA4	protein coding gene	5.51231
3591	A_21_P0012936	XLOC_l2_012323	linc	5.51225
12198	A_24_P85258	CFAP74	protein coding gene	5.51157
40289	A_23_P111860	RADIL	protein coding gene	5.50756
33253	A_23_P301846	CALCA	protein coding gene	5.50084
11704	A_22_P00022475	lnc-TMEM88B-1	lncRNA	5.50078
35977	A_23_P116414	PLA2G16	protein coding gene	5.49745
11770	A_23_P64058	RASGRP2	protein coding gene	5.49741
31276	A_32_P780817	CT45A1	protein coding gene	5.49672
28709	A_22_P00019769	lnc-CRNKL1-3	lncRNA	5.49576
52469	A_23_P253542	SMPX	protein coding gene	5.49479
56874	A_24_P317907	SORBS1	protein coding gene	5.49242
32449	A_23_P108082	CREB3L3	protein coding gene	5.48899
33930	A_33_P3298850	SLC16A8	protein coding gene	5.48886
59718	A_22_P00003067	lnc-C8orf39-1	lncRNA	5.47884
29447	A_23_P251151	NELL1	protein coding gene	5.47859
46389	A_23_P89431	CCL2	protein coding gene	5.47725
50191	A_23_P339119	ACSS3	protein coding gene	5.4745
26235	A_21_P0002113			5.46974
2614	A_33_P3284453	SOGA3	protein coding gene	5.46897
4928	A_23_P7313	SPP1	protein coding gene	5.46771
53619	A_23_P116414	PLA2G16	protein coding gene	5.4675
50904	A_23_P344884	CARNS1	protein coding gene	5.46152
27039	A_33_P3258777			5.46002
43474	A_23_P398566	NR4A3	protein coding gene	5.45961
10056	A_24_P62783	FABP3	protein coding gene	5.45782
61369	A_21_P0004343	LINC01574	linc	5.45673
1036	A_23_P120822	UPB1	protein coding gene	5.4559
20974	A_23_P116414	PLA2G16	protein coding gene	5.45421
16591	A_24_P389916	LRRC32	protein coding gene	5.45392
16431	A_33_P3249897		not annotated	5.45047
34810	A_33_P3222977	TEKT5	protein coding gene	5.44869
14956	A_33_P3305655	NBEAP1	pseudogene	5.44619
39461	A_24_P20630	LEF1	protein coding gene	5.44419
46039	A_23_P254831	MAGEB2	protein coding gene	5.44066
4534	A_23_P159237	GPR20	protein coding gene	5.4357
24091	A_33_P3249414	TRIM58	protein coding gene	5.43359
22506	A_23_P113572	CD19	protein coding gene	5.43251
2506	A_33_P3338740	DHH	protein coding gene	5.43074
45311	A_33_P3418716	EFHD1	protein coding gene	5.42221
11555	A_33_P3338698	IHH	protein coding gene	5.42011
61011	A_23_P134204	FAM71F1	protein coding gene	5.41953
27694	A_22_P00008311	lnc-ITGB3BP-1	antisense	5.41573
12567	A_23_P40217	DOK5	protein coding gene	5.41119
55205	A_19_P00315868			5.41096
36643	A_33_P3358397	LGI2	protein coding gene	5.40939
58320	A_23_P111583	CD36	protein coding gene	5.40911
15170	A_21_P0014556	lnc-ABHD12B-5	lncRNA	5.40692
7431	A_23_P257111	FBP1	protein coding gene	5.4065
20194	A_23_P7313	SPP1	protein coding gene	5.4057
42007	A_23_P7313	SPP1	protein coding gene	5.40073
49336	A_22_P00016935	TSPAN33	protein coding gene	5.40023
52480	A_33_P3780505	MT1DP	pseudogene	5.397
49471	A_23_P71170	TRPV6	protein coding gene	5.39417
7795	A_23_P383009	IGFBP5	protein coding gene	5.39368
22474	A_33_P3394584	FLJ16779	lncRNA	5.39342
55670	A_21_P0009153	LOC102723471	non coding RNA	5.39084
7364	A_23_P90359	NRTN	protein coding gene	5.39025
57078	A_23_P31124	COL21A1	protein coding gene	5.3895
35311	A_23_P39251	PLIN5	protein coding gene	5.38907
28415	A_23_P300033	PDGFRA	protein coding gene	5.38429
1080	A_21_P0000856	IL10RB-AS1	antisense	5.38404
57077	A_33_P3328559	TBC1D10C	protein coding gene	5.38356
30045	A_23_P71480	DEFB1	protein coding gene	5.38273
50382	A_23_P23996	MAT1A	protein coding gene	5.3813
61435	A_33_P3390656	ACSL6	protein coding gene	5.3794
22370	A_33_P3418005	CCDC160	protein coding gene	5.37864
30975	A_33_P3341722			5.37849
47527	A_23_P49145	ZG16	protein coding gene	5.37838
43227	A_33_P3256510	KCNK12	protein coding gene	5.3708
18632	A_23_P78248	KRT23	protein coding gene	5.36964
23858	A_33_P3315243	PRR29	protein coding gene	5.36901
47764	A_22_P00000521	LOC100287225	lncRNA	5.36739
30583	A_23_P110837	IRX4	protein coding gene	5.36707
47652	A_33_P3231247			5.36697
59878	A_23_P108280	CYP4F12	protein coding gene	5.3656
53269	A_23_P116414	PLA2G16	protein coding gene	5.36215
47698	A_23_P28815	CYP24A1	protein coding gene	5.36155
51562	A_33_P3401711	USH1G	protein coding gene	5.36136
61503	A_23_P85015	MAOB	protein coding gene	5.35931
25882	A_21_P0000922	LOC101927787	lncRNA	5.3582
36733	A_23_P116414	PLA2G16	protein coding gene	5.35601
3190	A_23_P85922	BMP8A	protein coding gene	5.35447
21085	A_23_P305092	CRTAM	protein coding gene	5.35388
25873	A_21_P0007910	DLEU1	lncRNA	5.35367
24558	A_23_P116414	PLA2G16	protein coding gene	5.35287
26462	A_23_P81898	UBD	protein coding gene	5.35266
48463	A_23_P342709	FBXO15	protein coding gene	5.35222
46676	A_23_P143526	S100B	protein coding gene	5.35201
45668	A_21_P0004457	lnc-CSNK1A1-1	linc	5.35169
21484	A_33_P3420266	ANKRD20A2	protein coding gene	5.35087
61602	A_23_P257231	ETNPPL	protein coding gene	5.34959
15078	A_24_P684183	SLC44A4	protein coding gene	5.34955
19113	A_23_P431971	CRTAC1	protein coding gene	5.34855
25594	A_23_P116414	PLA2G16	protein coding gene	5.34796
50650	A_33_P3226546			5.34764
53313	A_33_P3343066	PAX2	protein coding gene	5.34674
48197	A_23_P149121	DIRAS3	protein coding gene	5.34633
28088	A_32_P184464	ROPN1	protein coding gene	5.3451
44463	A_23_P112982	SVOP	protein coding gene	5.33592
56147	A_33_P3368945	LOC389332	lncRNA	5.33538
13830	A_23_P396299	MRVI1-AS1	antisense	5.33459
60191	A_23_P133691	RRAGD	protein coding gene	5.33356
45827	A_32_P102519	LOC541473	pseudogene	5.32766
30393	A_23_P42784	STK31	protein coding gene	5.32407
57756	A_22_P00005567			5.32125
23751	A_33_P3364180	FGD5	protein coding gene	5.31951
59391	A_23_P116414	PLA2G16	protein coding gene	5.31371
12091	A_22_P00006964		non coding RNA	5.3108
33081	A_33_P3285629	DNAI2	protein coding gene	5.31037
9797	A_23_P140748	NDRG4	protein coding gene	5.30968
40726	A_23_P88678	C15orf27	protein coding gene	5.30699
56476	A_23_P119562	CFD	protein coding gene	5.30329
61109	A_22_P00013980	LOC100422737		5.30239
33863	A_23_P131060	CYP4F8	protein coding gene	5.30087
25477	A_32_P53524	NTN1	protein coding gene	5.29555
60366	A_23_P105251	GLI1	protein coding gene	5.29346
26400	A_23_P42397	PRSS35	protein coding gene	5.29331
33685	A_33_P3315959	LGSN	protein coding gene	5.28923
44899	A_21_P0011100	XLOC_l2_003414	linc	5.28828
29441	A_32_P780862	BMP8B	protein coding gene	5.2872
44734	A_33_P3212109	DCDC2	protein coding gene	5.28435
58247	A_23_P76374	SYCP3	protein coding gene	5.28303
14817	A_24_P306594	C1orf167	protein coding gene	5.28144
61212	A_23_P132760	TRH	protein coding gene	5.27902
52580	A_33_P3397910	lnc-RAB1A-1	lncRNA	5.27794
36541	A_33_P3302245	TMEM59L	protein coding gene	5.27743
52277	A_22_P00009067	TPRG1-AS1	antisense	5.27617
16367	A_19_P00319537	LINC01091	linc	5.27477
42899	A_33_P3303649	MB	protein coding gene	5.27426
27176	A_32_P14762	OOEP	protein coding gene	5.27419
34816	A_23_P317450	DNAJB3	other	5.27068
2100	A_21_P0008118	lnc-ING1-1	linc	5.26981
39193	A_24_P186608	DPY19L2P2	pseudogene	5.26518
44803	A_23_P7313	SPP1	protein coding gene	5.2617
52915	A_32_P40288	TMEM200A	protein coding gene	5.26145
60272	A_22_P00015445	LOC100505664	non coding RNA	5.26129
44340	A_21_P0004420	lnc-ARRDC3-1	linc	5.25869
13183	A_21_P0011348	LOC283683	lncRNA	5.25202
60809	A_32_P207117	TSPYL6	protein coding gene	5.24848
35672	A_33_P3345309	PRSS56	protein coding gene	5.24785
9917	A_21_P0011101	LOC101927901	lncRNA	5.2461
9371	A_22_P00005363	lnc-DRD2-1	linc	5.245
12916	A_23_P136936	SYP	protein coding gene	5.24462
926	A_32_P416161	XKRX	protein coding gene	5.23873
44187	A_24_P942493	WSCD1	protein coding gene	5.23736
3684	A_24_P21507	SPAG6	protein coding gene	5.23711
32590	A_24_P31627	KCNB1	protein coding gene	5.23661
2117	A_33_P3213645	ERN2	protein coding gene	5.23454
8856	A_33_P3392391	CPT1C	protein coding gene	5.23314
25553	A_23_P52266	IFIT1	protein coding gene	5.23242
39157	A_33_P3347707	NOVA2	protein coding gene	5.23147
11805	A_22_P00006831	lnc-GABRE-1	lncRNA	5.22775
33311	A_23_P171074	ITM2A	protein coding gene	5.22761
36833	A_33_P3606685	C12orf80	other	5.22621
8264	A_33_P3379106	LINC00922	linc	5.22617
50789	A_33_P3639068	GFRA1	protein coding gene	5.22584
21493	A_33_P3421913	CADM1	protein coding gene	5.22361
49132	A_24_P49106	TCEAL7	protein coding gene	5.22212
51355	A_23_P103672	NES	protein coding gene	5.22122
12852	A_33_P3357759	MROH2A	protein coding gene	5.22111
25169	A_22_P00000677	lnc-ADA-1	lncRNA	5.22026
19616	A_23_P24083	PNLIPRP2	protein coding gene	5.21945
1115	A_33_P3260964	LINC01300	linc	5.21909
15031	A_24_P183664	TRIL	protein coding gene	5.21906
28596	A_23_P61487	LRRC20	protein coding gene	5.21867
31099	A_33_P3390868	SYNPO2	protein coding gene	5.21838
4345	A_33_P3293381	RASSF4	protein coding gene	5.2171
5111	A_23_P126869	PADI3	protein coding gene	5.20608
47206	A_33_P3297092	H2BFWT	protein coding gene	5.20466
48593	A_23_P312132	ITGAX	protein coding gene	5.20273
43888	A_23_P144348	SLIT2	protein coding gene	5.20225
45212	A_22_P00015892	lnc-TCF19-1	lncRNA	5.19894
49244	A_23_P16252	KLK1	protein coding gene	5.19561
56352	A_23_P136246	COX7B2	protein coding gene	5.19177
7830	A_33_P3307337	MAPK4	protein coding gene	5.18955
36018	A_23_P253446	GAP43	protein coding gene	5.18888
10608	A_33_P3348061	CABP7	protein coding gene	5.18864
39331	A_23_P307968	CDH23	protein coding gene	5.18801
54037	A_19_P00322276	LINC01091	linc	5.18626
21028	A_21_P0007851	LINC01405	linc	5.18215
31410	A_32_P225345	C11orf88	protein coding gene	5.18159
8266	A_33_P3294917	PRUNE2	protein coding gene	5.17691
43671	A_33_P3373388	GABRA1	protein coding gene	5.17623
11594	A_33_P3328450	HMX1	protein coding gene	5.17531
41595	A_23_P118571	SOST	protein coding gene	5.17501
54625	A_24_P10214	STXBP6	protein coding gene	5.17288
47998	A_23_P4074	CFAP52	protein coding gene	5.17116
17844	A_24_P240187	LRRN1	protein coding gene	5.16847
41113	A_22_P00005179	lnc-DIRC1-1	linc	5.16467
43635	A_32_P313405	LAMA1	protein coding gene	5.16378
44347	A_22_P00014665			5.16243
28743	A_21_P0014150	LOC101928489	lncRNA	5.16216
38062	A_21_P0011676	XLOC_l2_006621	linc	5.15973
57100	A_21_P0000057	RGS9	protein coding gene	5.15849
11177	A_23_P216340	SLA	protein coding gene	5.15605
59076	A_23_P119573	KCNN1	protein coding gene	5.15446
5875	A_21_P0003810	lnc-CLDN24-3	linc	5.14923
44421	A_21_P0010314	LOC102724800	non coding RNA	5.14738
12116	A_33_P3364854	TRPV6	protein coding gene	5.14673
47452	A_24_P49997	PFN3	protein coding gene	5.1441
52285	A_21_P0002267	lnc-C2orf40-4	linc	5.14003
9799	A_23_P215484	CCL26	protein coding gene	5.13996
8768	A_23_P90722	PTPRN	protein coding gene	5.13914
29107	A_24_P350397	HSD3B1	protein coding gene	5.13651
3957	A_32_P222460	LOC100130700	pseudogene	5.13468
7278	A_33_P3687198	HRK	protein coding gene	5.13222
22970	A_33_P3219279	JPH4	protein coding gene	5.1319
20564	A_23_P420281	PRKCB	protein coding gene	5.13015
28918	A_33_P3286864	ATP8A2	protein coding gene	5.12916
529	A_23_P200579	CELA3B	protein coding gene	5.12748
47892	A_21_P0006238	lnc-RXRA-1	linc	5.12397
25216	A_19_P00320067	LOC100130417	lncRNA	5.12019
2844	A_23_P70318	ENPP4	protein coding gene	5.11924
5477	A_33_P3314176	FAM46C	protein coding gene	5.1181
56040	A_22_P00021102	lnc-LRRC17-1	lncRNA	5.11708
37376	A_22_P00008884	LOC101929641	non coding RNA	5.11322
54586	A_21_P0011039	LINC01252	linc	5.11254
32961	A_23_P156562	CRIP3	protein coding gene	5.11138
55234	A_21_P0009266			5.10686
33012	A_22_P00023337		non coding RNA	5.10616
29418	A_23_P349566	CCDC85A	protein coding gene	5.10484
30348	A_23_P155900	NPFFR2	protein coding gene	5.10478
19509	A_32_P183765	ERBB4	protein coding gene	5.10278
23172	A_23_P3643	DNASE1L2	protein coding gene	5.10245
9289	A_23_P103877	LRRC38	protein coding gene	5.10147
50463	A_21_P0005005	LOC102724520	non coding RNA	5.09887
5266	A_32_P49867	LRCOL1	protein coding gene	5.09884
32254	A_23_P150549	PGA3	protein coding gene	5.09723
11197	A_33_P3366754	LOC100128670		5.09454
38256	A_23_P49865	YBX2	protein coding gene	5.09403
24333	A_21_P0000024	FLT1	protein coding gene	5.092
14008	A_32_P214178	LINC00319	linc	5.09099
23975	A_23_P35444	INA	protein coding gene	5.08974
10160	A_21_P0010042	LOC101929863	non coding RNA	5.0879
52136	A_22_P00007928	lnc-HTR1A-1	linc	5.08274
53467	A_23_P106602	CRISPLD2	protein coding gene	5.08035
51469	A_22_P00013821	lnc-RPE-2	linc	5.07979
44331	A_23_P145935	EPHB6	protein coding gene	5.07959
24184	A_21_P0000841	PRKAG2-AS1	antisense	5.07822
58451	A_23_P416178	CCDC136	protein coding gene	5.07699
57262	A_23_P16275	TSKS	protein coding gene	5.07689
61661	A_24_P302584	SOX11	protein coding gene	5.07396
36069	A_33_P3260342	NFASC	protein coding gene	5.07381
45178	A_23_P325606	ESX1	protein coding gene	5.06999
61222	A_23_P215720	CFTR	protein coding gene	5.06587
24533	A_32_P225659	UTS2B	protein coding gene	5.06417
59122	A_24_P112941	LINGO1	protein coding gene	5.06381
6001	A_24_P105933	VIPR1	protein coding gene	5.06347
12250	A_21_P0000594	BOK-AS1	antisense	5.05954
50496	A_23_P201459	IFI6	protein coding gene	5.05911
34105	A_24_P497464	SOX9-AS1	antisense	5.0554
9957	A_33_P3229370	ID4	protein coding gene	5.05341
38818	A_21_P0007735	lnc-KITLG-2	linc	5.05152
39974	A_23_P71946	BSPRY	protein coding gene	5.05072
47884	A_21_P0009261	lnc-MSI2-2	linc	5.04656
38914	A_33_P3333058		not annotated	5.04654
50748	A_21_P0004850	lnc-E2F3-1	linc	5.04624
57319	A_19_P00321588	C14orf132	other	5.04481
5118	A_21_P0004421	LUCAT1	lncRNA	5.04341
42466	A_33_P3227269	GATA3-AS1	antisense	5.04228
1317	A_23_P217178	MAGEC1	protein coding gene	5.04167
749	A_23_P163306	CGNL1	protein coding gene	5.04146
59636	A_23_P145644	DDC	protein coding gene	5.04087
13083	A_33_P3308512	SLC16A10	protein coding gene	5.04059
5587	A_32_P122226	AMDHD1	protein coding gene	5.0394
16926	A_24_P211842	FADS6	protein coding gene	5.0393
32222	A_23_P50517	ZNF541	protein coding gene	5.03755
30597	A_21_P0003758	lnc-ARSJ-1	linc	5.03484
32766	A_23_P89431	CCL2	protein coding gene	5.03341
29077	A_32_P216520	WIF1	protein coding gene	5.03293
16917	A_21_P0012731	lnc-BMP2K-1	lncRNA	5.03151
51063	A_33_P3250745	DCAF8L1	protein coding gene	5.03089
51856	A_33_P3372099	DDIT4L	protein coding gene	5.03061
41946	A_21_P0009038	lnc-CES1-2	linc	5.0285
8076	A_21_P0012881	XLOC_l2_011908	linc	5.02773
32911	A_23_P118095	RPL3L	protein coding gene	5.02582
7107	A_21_P0010816		pseudogene	5.02312
41740	A_33_P3729002	lnc-GRHL2-9	lncRNA	5.02261
27038	A_22_P00014437			5.02244
62923	A_23_P110253	KIT	protein coding gene	5.0221
51763	A_32_P84373	FAM153B	protein coding gene	5.02191
14492	A_33_P3330911	BCAS1	protein coding gene	5.02184
59790	A_21_P0002731	LOC102725370	non coding RNA	5.02053
17263	A_23_P301021	ASTN1	protein coding gene	5.01876
36619	A_24_P406601	OLFM1	protein coding gene	5.01709
11321	A_23_P211680	MLC1	protein coding gene	5.01148
32405	A_33_P3218704			5.01107
35848	A_23_P31064	MOXD1	protein coding gene	5.01085
42917	A_23_P161727	HSPB2	protein coding gene	5.01077
10319	A_23_P162579	HSPB8	protein coding gene	5.01015
44400	A_23_P310460	MDGA1	protein coding gene	5.00908
36468	A_33_P3422010	DNAH12	protein coding gene	5.00205
10041	A_22_P00004611	LOC101929511	non coding RNA	5.00092
59300	A_33_P3264910	NKX6-2	protein coding gene	4.99938
4545	A_32_P60065	F2RL2	protein coding gene	4.99846
14872	A_21_P0011018	LOC101928620	non coding RNA	4.99826
21822	A_33_P3320197	FAM150B	protein coding gene	4.9958
56417	A_22_P00005849		non coding RNA	4.99462
21392	A_23_P205713	STXBP6	protein coding gene	4.99459
26175	A_33_P3298216	MYO16	protein coding gene	4.99381
52766	A_24_P231829	BHMT2	protein coding gene	4.99262
48274	A_33_P3412418			4.98541
40574	A_33_P3887081	LINC01252	linc	4.98538
13935	A_21_P0013154			4.98507
53744	A_22_P00000141	LOC100506107	non coding RNA	4.98505
19571	A_24_P6825	ZCCHC18	protein coding gene	4.98444
61809	A_21_P0010170			4.98443
52291	A_23_P62752	NPPB	protein coding gene	4.9832
35309	A_33_P3314231	CRYBA2	protein coding gene	4.98075
8167	A_23_P53176	FOLR1	protein coding gene	4.98064
13972	A_33_P3262376	OTUD7A	protein coding gene	4.97989
13845	A_33_P3263867	P2RX7	protein coding gene	4.97774
54354	A_33_P3709327	EPHA5-AS1	antisense	4.97571
38695	A_23_P62953	PBX1	protein coding gene	4.97514
16578	A_23_P121564	GUCY1B3	protein coding gene	4.97467
22151	A_23_P92517	TTC29	protein coding gene	4.97447
57743	A_33_P8979259	LOC101929419	non coding RNA	4.97435
30624	A_33_P3400248	FGF20	protein coding gene	4.96992
5822	A_32_P57810	RNF157	protein coding gene	4.96969
22702	A_22_P00017401	lnc-VCAN-1	linc	4.968
45896	A_33_P3323647	EPHA10	protein coding gene	4.96384
20656	A_22_P00010966	LOC101929340	lncRNA	4.9637
13070	A_33_P3358745	SEPP1	protein coding gene	4.96327
58583	A_21_P0008873	TP53TG3D	protein coding gene	4.96316
7924	A_23_P103877	LRRC38	protein coding gene	4.96255
34488	A_32_P38645	RIMS4	protein coding gene	4.96022
50717	A_33_P3419369	LINC01091	linc	4.95932
1708	A_23_P102117	WNT10A	protein coding gene	4.9579
19921	A_23_P33961	BRS3	protein coding gene	4.95786
23377	A_23_P85082	RHOXF1	protein coding gene	4.95673
15489	A_21_P0000129	DCLK1	protein coding gene	4.95598
49938	A_21_P0004504	LOC101928505	lncRNA	4.9559
39131	A_33_P3241786	ADD2	protein coding gene	4.95155
36007	A_33_P3324974		not annotated	4.95014
42076	A_33_P3490572	PM20D1	protein coding gene	4.94583
33139	A_33_P3287223	DPP4	protein coding gene	4.94428
55963	A_23_P103877	LRRC38	protein coding gene	4.94304
44853	A_23_P312999	C4orf22	protein coding gene	4.94298
53374	A_23_P87310	LMO1	protein coding gene	4.94274
36695	A_21_P0008269	LINC00605	linc	4.94144
9331	A_22_P00019726	PHKA2-AS1	antisense	4.9402
806	A_21_P0013601	XLOC_l2_015033	linc	4.93944
34029	A_33_P3382100	IGFN1	protein coding gene	4.9379
13003	A_21_P0014087	LOC100506405	non coding RNA	4.9366
35385	A_23_P34007	PPP1R2P9	pseudogene	4.93273
40896	A_21_P0000632	USP3-AS1	antisense	4.93181
4651	A_23_P121926	SEPP1	protein coding gene	4.93072
49902	A_24_P203308	STRA8	protein coding gene	4.92964
62429	A_33_P3638471	TRGV7	pseudogene	4.92789
30482	A_22_P00025809	LOC101927418	lncRNA	4.9277
47319	A_21_P0012933	LOC643201	pseudogene	4.9265
31765	A_21_P0003002	lnc-ST3GAL6-1	linc	4.92598
51220	A_23_P210164	HOXD8	protein coding gene	4.92107
32353	A_22_P00021147	lnc-LRRK1-4	lncRNA	4.91896
35194	A_22_P00018986	FBXO3-AS1	antisense	4.91679
14967	A_23_P360754	ADAMTS4	protein coding gene	4.91563
10534	A_33_P3209960	RASGRP2	protein coding gene	4.9145
21282	A_22_P00024593	C5orf66-AS1	antisense	4.9137
29106	A_33_P3293748	TRIM50	protein coding gene	4.91296
27380	A_21_P0004422	lnc-ARRDC3-1	linc	4.91195
42821	A_23_P84860	FAM107A	protein coding gene	4.91147
15786	A_19_P00318559	LINC01021	linc	4.91012
59234	A_33_P3329013	SSTR2	protein coding gene	4.90942
39472	A_32_P170547	CT45A5	protein coding gene	4.90894
15446	A_33_P3312119	C6orf99	other	4.90843
52244	A_23_P36882	NTS	protein coding gene	4.90829
56227	A_33_P3692979	LOC283485		4.90301
53088	A_23_P103877	LRRC38	protein coding gene	4.90211
2224	A_23_P348146	SLAIN1	protein coding gene	4.90104
52664	A_22_P00020016			4.90097
39757	A_23_P145054	FAM162B	protein coding gene	4.89978
51560	A_23_P15619	PRAC1	protein coding gene	4.89712
18203	A_23_P137484	L1TD1	protein coding gene	4.89647
50638	A_23_P154643	BMP7	protein coding gene	4.89606
42220	A_33_P3369401	CYP24A1	protein coding gene	4.89555
42860	A_33_P3293918	SH2D3C	protein coding gene	4.89534
61672	A_22_P00007836	lnc-HPS3-3	lncRNA	4.89334
27402	A_23_P32805	GRID1	protein coding gene	4.88952
44415	A_21_P0005694	LOC101929268	lncRNA	4.88663
9416	A_23_P55448	KRT12	protein coding gene	4.88652
27715	A_23_P110196	HERC5	protein coding gene	4.8841
34144	A_22_P00011317	LOC101926940	lncRNA	4.88298
22624	A_23_P254741	SOD3	protein coding gene	4.88127
55936	A_23_P49448	FA2H	protein coding gene	4.88042
61332	A_23_P50232	AURKC	protein coding gene	4.87994
61343	A_23_P379789	ST8SIA5	protein coding gene	4.87949
6569	A_33_P3274935	HID1	protein coding gene	4.87857
22153	A_22_P00000919	lnc-AKAP10-1	lncRNA	4.87785
39404	A_23_P108157	TJP3	protein coding gene	4.87731
518	A_33_P3268838	CPEB1	protein coding gene	4.87659
31018	A_21_P0000643	ST8SIA6-AS1	antisense	4.87651
47746	A_33_P3406866	NFASC	protein coding gene	4.87635
18697	A_22_P00008484	KCNB1	protein coding gene	4.876
61248	A_23_P414654	RAB37	protein coding gene	4.87476
55417	A_22_P00000818			4.87286
26900	A_33_P3270668	FAM131B	protein coding gene	4.86884
50557	A_23_P6263	MX2	protein coding gene	4.86536
26254	A_23_P145984	TSPAN12	protein coding gene	4.86408
55840	A_23_P154338	EFHD1	protein coding gene	4.86367
14605	A_23_P83200	AK8	protein coding gene	4.86158
58064	A_23_P154855	KCNE1	protein coding gene	4.85854
2177	A_23_P372308	RGMA	protein coding gene	4.85851
50196	A_33_P3318771	CALCA	protein coding gene	4.8569
52449	A_23_P167812	RBM24	protein coding gene	4.85546
38945	A_33_P3310894	KRT40	protein coding gene	4.85029
49114	A_23_P254863	NIM1K	protein coding gene	4.84882
1429	A_23_P103877	LRRC38	protein coding gene	4.84865
49063	A_33_P3239295	PRODH	protein coding gene	4.84762
10284	A_33_P3322814	NTRK3	protein coding gene	4.84736
19852	A_21_P0006413	LINC01203	linc	4.8452
12831	A_23_P407840	FNDC1	protein coding gene	4.84162
62841	A_33_P3250443	DUOXA2	protein coding gene	4.8406
38085	A_21_P0012599	lnc-BMP2K-1	linc	4.83923
21042	A_21_P0010979			4.83239
23756	A_23_P406025	PRUNE2	protein coding gene	4.83236
47945	A_33_P3314559	RAB3C	protein coding gene	4.83203
36790	A_33_P3291484	ST8SIA4	protein coding gene	4.83009
13227	A_23_P110624	CTNND2	protein coding gene	4.82902
62440	A_33_P3696837	MLK7-AS1	antisense	4.82667
39439	A_21_P0007830	MUC19	protein coding gene	4.82558
29482	A_33_P3328410			4.82495
11174	A_19_P00320814	LINC00160	linc	4.82371
58462	A_23_P144326	ASB5	protein coding gene	4.82362
27223	A_21_P0001634	LOC102723817	non coding RNA	4.82244
36148	A_24_P192914	AMICA1	protein coding gene	4.82215
53770	A_21_P0003024	LOC101928948	non coding RNA	4.82055
46948	A_32_P38623	PPP1R9A	protein coding gene	4.82014
58330	A_32_P110472	IYD	protein coding gene	4.82003
17475	A_23_P336612	C15orf26	protein coding gene	4.81861
17297	A_23_P38959	VAV1	protein coding gene	4.81722
51429	A_22_P00012889	LINC01234	linc	4.81513
8907	A_24_P212539	GALM	protein coding gene	4.8139
34567	A_23_P110403	PDLIM3	protein coding gene	4.81306
47359	A_23_P212655	KLHL6	protein coding gene	4.81063
54369	A_24_P100613	LAMA1	protein coding gene	4.80985
15628	A_21_P0014572	lnc-CACNB3-1	lncRNA	4.80969
48219	A_23_P329962	SUN3	protein coding gene	4.80788
7408	A_23_P18282	DLEC1	protein coding gene	4.80564
45557	A_23_P72989	CCR4	protein coding gene	4.80341
30196	A_22_P00016610			4.80267
29044	A_21_P0012183	ANKRD20A5P	pseudogene	4.80244
9093	A_21_P0008092	lnc-NDFIP2-8	linc	4.80155
487	A_33_P3821494	MAPK8IP2	protein coding gene	4.80133
26574	A_22_P00001221	SLC22A31	protein coding gene	4.80094
36169	A_23_P128084	ITGA7	protein coding gene	4.79758
18939	A_21_P0013637		pseudogene	4.79573
41489	A_22_P00010420	LOC104968399	lncRNA	4.7944
12241	A_23_P354705	ST8SIA1	protein coding gene	4.79372
42658	A_19_P00321403	LOC101928932	non coding RNA	4.79083
61721	A_21_P0011153	XLOC_l2_003803	linc	4.79069
1540	A_21_P0013726	LOC403323	lncRNA	4.78684
31433	A_22_P00024983	LOC101929756	non coding RNA	4.78503
61549	A_23_P353614	C8orf46	protein coding gene	4.78459
7270	A_23_P51936	TNFRSF9	protein coding gene	4.78163
10266	A_21_P0014592	LOC101926887	non coding RNA	4.77972
1957	A_21_P0005248	lnc-ASB4-3	linc	4.77957
11349	A_22_P00024592			4.77635
1961	A_21_P0012220	ANKRD20A11P	pseudogene	4.77498
16021	A_23_P433229	PHYHIP	protein coding gene	4.77495
23168	A_33_P3236517	PDCL2	protein coding gene	4.77435
22378	A_23_P10647	CYTL1	protein coding gene	4.77354
46309	A_23_P331700	SRRM3	protein coding gene	4.77194
34317	A_33_P3283863	TENM1	protein coding gene	4.77015
18568	A_22_P00025315			4.76933
49012	A_23_P363769	KRT86	protein coding gene	4.76817
47128	A_21_P0005608	LOC101927525	non coding RNA	4.768
28747	A_32_P25357	CDH15	protein coding gene	4.76515
48495	A_24_P870620	PTN	protein coding gene	4.76498
56266	A_22_P00011799	lnc-PGPEP1L-2	linc	4.7646
1584	A_24_P19228	GAMT	protein coding gene	4.76427
53772	A_33_P3397835	RFPL4B	protein coding gene	4.76385
21339	A_23_P365412	MFSD4	protein coding gene	4.76177
19204	A_22_P00010760			4.76033
16352	A_24_P38290	TAC1	protein coding gene	4.75984
10140	A_32_P66222	ANKRD20A2	protein coding gene	4.75458
25559	A_23_P129064	GATM	protein coding gene	4.75349
30054	A_24_P142305	HBA2	protein coding gene	4.75318
20042	A_23_P11390	VCY	protein coding gene	4.75025
15925	A_23_P103601	MAN1C1	protein coding gene	4.75002
4772	A_33_P3319886	C19orf45	protein coding gene	4.74939
25363	A_21_P0001105	LOC101928043	lncRNA	4.74919
44728	A_22_P00024071	lnc-C1orf200-3	linc	4.74915
49674	A_22_P00002758			4.74737
37728	A_21_P0013178	LOC102659288	lncRNA	4.74716
33781	A_33_P3248354	OLFM1	protein coding gene	4.7443
61211	A_21_P0014724	LOC100507336	non coding RNA	4.74423
11719	A_21_P0011850	XLOC_l2_007543	linc	4.74338
22998	A_22_P00022495	LOC101927512	non coding RNA	4.74173
14255	A_22_P00003155	FRRS1L	protein coding gene	4.7399
53103	A_32_P4985	CAMTA1	protein coding gene	4.73275
41769	A_23_P216118	UNC5D	protein coding gene	4.73235
42903	A_23_P500300	TRIM15	protein coding gene	4.72913
19506	A_23_P67339	RCN3	protein coding gene	4.72882
1492	A_22_P00016042	LOC101927492	lncRNA	4.7279
41023	A_33_P3362826	ANKRD31	protein coding gene	4.72773
23690	A_23_P153897	GNG7	protein coding gene	4.72738
2986	A_32_P153773	CACNA1B	protein coding gene	4.72717
25338	A_22_P00009092	LOC101927902	non coding RNA	4.72674
16532	A_33_P3369495	CLDN10	protein coding gene	4.7236
35071	A_23_P54918	LDHD	protein coding gene	4.7225
60972	A_21_P0009742	lnc-PGLYRP2-1	linc	4.7222
15229	A_23_P156880	ENPP1	protein coding gene	4.72115
18716	A_32_P486693	NRIP3	protein coding gene	4.71919
45484	A_33_P3258061	PALM3	protein coding gene	4.71642
60570	A_24_P367645	MAP7D2	protein coding gene	4.71636
45958	A_33_P3270445	BAI2	protein coding gene	4.71234
49278	A_33_P3334773	MYOD1	protein coding gene	4.7102
5523	A_33_P3374987	NAT16	protein coding gene	4.7085
37920	A_24_P336983	CAPN13	protein coding gene	4.70823
25227	A_24_P350589	RNF150	protein coding gene	4.70746
20385	A_23_P2283	TAC3	protein coding gene	4.70689
20585	A_33_P3322594	MAGEB17	protein coding gene	4.70402
6348	A_24_P472007	UNC13A	protein coding gene	4.70349
10752	A_24_P579356	ARHGAP28	protein coding gene	4.70242
14657	A_23_P111919	PURG	protein coding gene	4.69993
34572	A_24_P389415	PNMA2	protein coding gene	4.69867
45805	A_23_P95231	CASC1	protein coding gene	4.69858
44022	A_23_P216108	ANK1	protein coding gene	4.69682
6344	A_21_P0008381			4.69147
10448	A_21_P0000824	PAXBP1-AS1	antisense	4.69041
[truncated: 9,128 more rows]

## Sheet: S9
Supplementary Table S9: Up-regulated/hypomethylated genes in NSCLC cell lines that show up-regulation by 5-aza-dC and TSA in SAECs.
[truncated: 52 more rows]

[truncated: 4 more sheets: S10, S11, S12, S13]
